# Supplementary material for: Circadian Disruption Primes Myofibroblasts for Accelerated Activation as a Mechanism Underpinning Fibrotic Progression in Non-Alcoholic Fatty Liver Disease
Source: MDPI journal article supplement (doi:10.3390/cells12121582), 2023-06-08
Supplement: s1 [file s1]

## Supplementary Figures for Circadian disruption primes myofibroblasts for accelerated activation as a mechanism underpinning fibrotic progression in non-alcoholic fatty liver disease

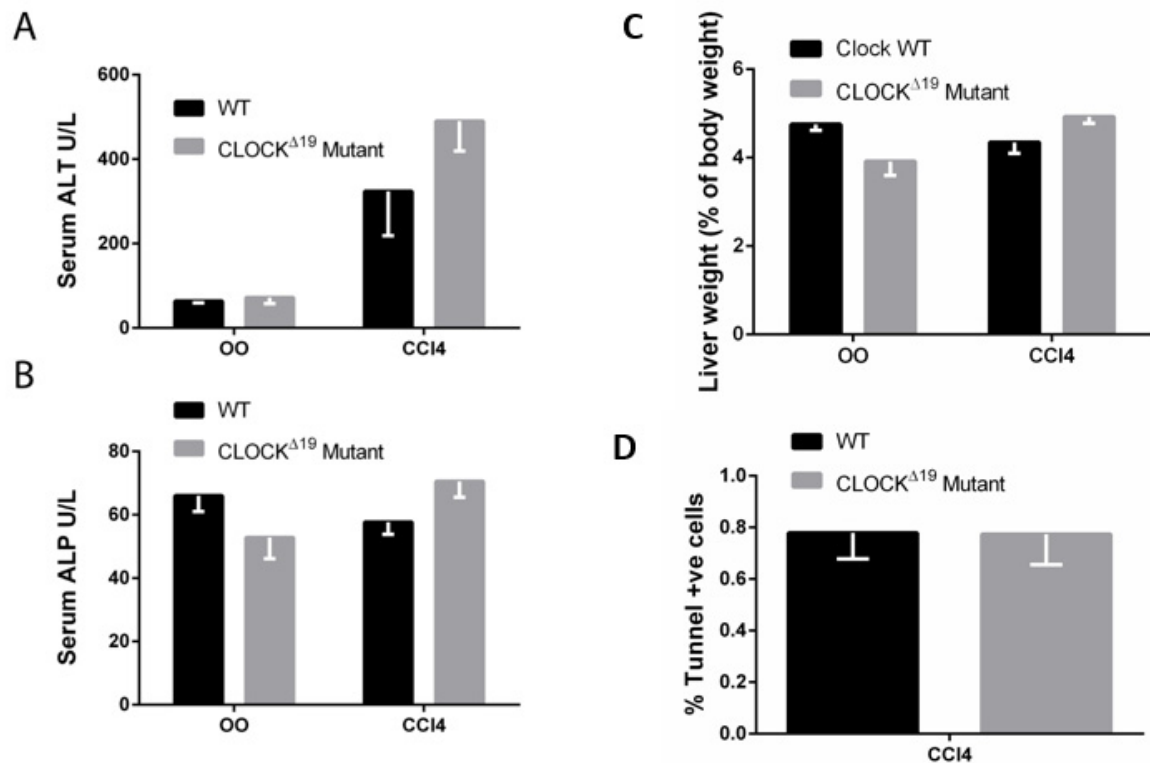

**Supplementary Figure S1. Liver weights and function tests after CCl<sub>4</sub> treatment** No significant differences between the WT and  $CLOCK^{\Delta 19}$  are evident in (A) serum LFT, (B) Serum ALP, (C) liver weight to body weight ratios or (D) TUNEL staining. Error bars represent mean  $\pm$  SD, n=3-5.

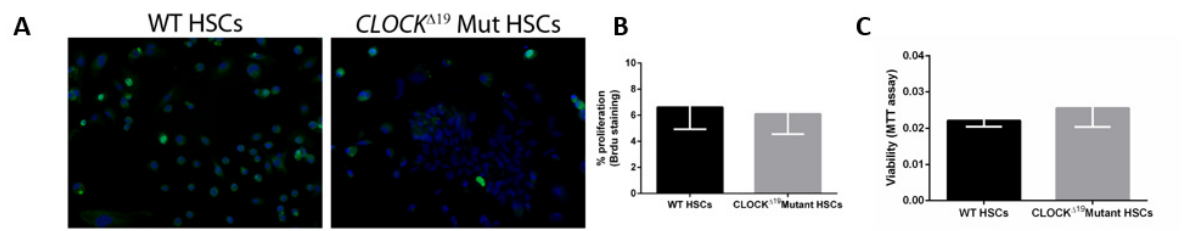

**Supplementary Figure S2. BRDU incorporation and MTT assay** No significant difference between WT and *CLOCK*<sup>Δ19</sup> was observed in proliferation via BRDU (A,B) or viability via MTT assay. Error bars represent mean +/- SD. N=3
