# Supplementary material for: Circadian Disruption Primes Myofibroblasts for Accelerated Activation as a Mechanism Underpinning Fibrotic Progression in Non-Alcoholic Fatty Liver Disease
Source: Cells. 2023 Jun 8;12(12):1582. doi: 10.3390/cells12121582 (PMC10297459; doi:10.3390/cells12121582)
Supplement: Supplementary file 1 [file cells-12-01582-s001.zip]

Archive with 4 entries (4 files):
- Supplementary Figures for CLOCK paper.pdf
- Supplementary Table S1 Microarray analysis.xlsx
- Supplementary Table S2 upregulated extracellular genes.xlsx
- Supplementary Table S3 circadian rhythm gene expression changes.xlsx
