# Supplementary material for: Circadian Disruption Primes Myofibroblasts for Accelerated Activation as a Mechanism Underpinning Fibrotic Progression in Non-Alcoholic Fatty Liver Disease
Source: Cells. 2023 Jun 8;12(12):1582. doi: 10.3390/cells12121582 (PMC10297459; doi:10.3390/cells12121582)
Supplement: Supplementary file 1 [file cells-12-01582-s001.zip › Supplementary Table S1 Microarray analysis.xlsx]

## Sheet: RMA
Probeset ID	Gene Symbol	Gene Title	RefSeq Transcript ID	Alignments	Genome Version	Mut_A_T0_05_b1	Mut_A_T0_05_b2	Mut_A_T0_05_b3	Mut_A_T12_06_b1	Mut_A_T12_06_b2	Mut_A_T12_06_b3	Mut_Q_T0_04_b1	Mut_Q_T0_04_b3	WT_A_T0_02_b1	WT_A_T0_02_b2	WT_A_T0_02_b3	WT_A_T12_03_b1	WT_A_T12_03_b2	WT_A_T12_03_b3	WT_Q_T0_01_b1	WT_Q_T0_01_b3	Mean(Mut * A * T0)	Mean(Mut * A * T12)	Mean(Mut * Q * T0)	Mean(WT * A * T0)	Mean(WT * A * T12)	Mean(WT * Q * T0)	Ratio(Mut * A * T0 vs. Mut * Q * T0)	Fold-Change(Mut * A * T0 vs. Mut * Q * T0)	log2Ratio(Mut * A * T0 vs. Mut * Q * T0)	p.value.mut_A_T0_vs_mut_Q_T0	fdr.mut_A_T0_vs_mut_Q_T0	Ratio(Mut * A * T12 vs. Mut * Q * T0)	Fold-Change(Mut * A * T12 vs. Mut * Q * T0)	log2Ratio(Mut * A * T12 vs. Mut * Q * T0)	p.value.mut_A_T12_vs_mut_Q_T0	fdr.mut_A_T12_vs_mut_Q_T0	Ratio(WT * A * T0 vs. WT * Q * T0)	Fold-Change(WT * A * T0 vs. WT * Q * T0)	log2Ratio(WT * A * T0 vs. WT * Q * T0)	p.value.WT_A_T0_vs_WT_Q_T0	fdr.WT_A_T0_vs_WT_Q_T0	Ratio(WT * A * T12 vs. WT * Q * T0)	Fold-Change(WT * A * T12 vs. WT * Q * T0)	log2Ratio(WT * A * T12 vs. WT * Q * T0)	p.value.WT_A_T12_vs_WT_Q_T0	fdr.WT_A_T12_vs_WT_Q_T0	Ratio(Mut * A * T12 vs. Mut * A * T0)	Fold-Change(Mut * A * T12 vs. Mut * A * T0)
1447939_a_at	Gm21093 /// Gm3893 /// Gm5859 /// Gm7819 /// LOC101055653 /// LOC101056212 /// LOC101056243	predicted gene, 21093 /// predicted gene 3893 /// predicted pseudogene 5859 /// predict	NR_033506 /// XM_003945751 /// XM_003945752 /// XR_033794 /// XR_106271 /// XR_140627 /	chr4_GL456350_random:83195-88332 (+) // 97.24 // /// chr4_JH584293_random:142939-148075	NCBI 38	317.783	317.44	183.457	340.523	366.538	255.797	1152.81	3121.88	259.293	368.276	245.672	302.227	411.872	230.133	792.224	85.5531	264.514	317.24	1897.13	286.267	305.986	260.338	0.139433	-7.17192	-2.84236	0.00130673	0.00729843	0.167227	-5.97991	-2.58012	0.00265558	0.0129006	1.0996	1.0996	0.136979	0.846849	0.9377	1.17534	1.17534	0.233078	0.742809	0.8815	1.19933	1.19933
1460011_at	Cyp26b1	cytochrome P450, family 26, subfamily b, polypeptide 1	NM_001177713 /// NM_175475	chr6:84571418-84572923 (-) // 95.17 // qC3 chr6:84571418-84572923 (-) // 95.17 // qC3	NCBI 38	419.597	459.257	662.842	286.85	379.158	501.915	2391.38	6225.94	420.88	413.565	811.341	340.796	419.86	996.079	727.824	725.508	503.619	379.348	3858.43	520.758	522.356	726.662	0.130521	-7.66163	-2.93765	4.22043e-05	0.000480831	0.0983137	-10.1715	-3.34646	1.14283e-05	0.000174958	0.716645	-1.39539	-0.480669	0.339544	0.580243	0.718841	-1.39113	-0.476255	0.343841	0.583826	0.753243	-1.32759
1435579_at	---	---	---	chr1:138483394-138619743 (-) // 95.15 // qE4 chr3:83135943-83136337 (+) // 41.81 // qE3	NCBI 38	19.1218	18.5974	15.3874	16.4717	16.201	13.738	217.689	521.045	19.2648	17.7415	13.2379	21.2793	17.4287	17.6654	97.18	45.956	17.6217	15.4195	336.779	16.5396	18.7118	66.828	0.0523242	-19.1116	-4.25638	1.66022e-08	1.20771e-06	0.045785	-21.8412	-4.44898	9.77953e-09	8.38529e-07	0.247494	-4.0405	-2.01453	5.95269e-05	0.000731731	0.279998	-3.57145	-1.83651	0.000141296	0.00150367	0.875024	-1.14283
1427184_at	Tcrb-J	T cell receptor beta, joining region	---	chr6:41116035-41548181 (+) // 98.26 // qB1 chr6:41116035-41548181 (+) // 98.26 // qB1 c	NCBI 38	29.5256	26.2618	25.8547	32.3605	30.9893	23.6456	175.679	459.299	26.5563	32.5952	26.34	28.0355	25.7451	22.7059	68.9572	70.8764	27.1673	28.7307	284.083	28.3577	25.4027	69.9164	0.0956314	-10.4568	-3.38637	4.13884e-08	2.4603e-06	0.101135	-9.88782	-3.30565	5.49651e-08	3.07327e-06	0.405595	-2.46551	-1.30189	0.000737946	0.00547854	0.363329	-2.75232	-1.46065	0.000281466	0.00258911	1.05754	1.05754
1457324_at	Gm17167	predicted gene 17167	---	chr4_JH584294_random:52078-52928 (+) // 62.65 // /// chr4:42207122-42207971 (+) // 79.0	NCBI 38	49.0151	37.2427	31.3837	50.5906	40.0028	32.9642	199.882	1466.6	41.9942	43.2587	36.057	40.3331	46.0762	36.9661	154.036	117.703	38.55	40.5573	541.43	40.3104	40.9556	134.65	0.0712003	-14.0449	-3.81197	1.33079e-05	0.000195569	0.0749074	-13.3498	-3.73875	1.622e-05	0.000230696	0.299373	-3.34032	-1.73998	0.00845384	0.038584	0.304165	-3.28769	-1.71707	0.00914253	0.0417426	1.05207	1.05207
1425947_at	Ifng	interferon gamma	NM_008337	chr10:118441045-118445892 (+) // 95.39 // qD2 chr10:118441045-118445892 (+) // 95.39 //	NCBI 38	14.0002	15.2168	11.5223	14.4971	16.7597	12.4139	7708.88	4112.07	12.3455	15.2183	11.2796	15.2928	15.3698	13.6432	5373.53	376.615	13.4895	14.4483	5630.32	12.8447	14.7466	1422.59	0.00239592	-417.376	-8.7052	2.50484e-08	1.67364e-06	0.00256621	-389.68	-8.60615	2.86864e-08	1.85356e-06	0.00902914	-110.753	-6.7912	4.46345e-07	1.62785e-05	0.0103661	-96.4687	-6.59198	6.24167e-07	2.13585e-05	1.07107	1.07107
1439736_at	5830453J16Rik	RIKEN cDNA 5830453J16 gene	---	chr11:46377725-46378274 (-) // 36.63 // qB1.1 chr11:46377725-46378274 (-) // 36.63 // q	NCBI 38	10.8911	9.79306	11.4429	10.1065	9.74791	12.4476	248.59	194.936	10.9883	10.6982	9.62896	9.9914	9.87512	9.68923	144.298	21.6534	10.6867	10.7036	220.134	10.4218	9.85114	55.8978	0.0485461	-20.599	-4.3645	1.23816e-06	3.22652e-05	0.0486234	-20.5662	-4.36221	1.24537e-06	3.25231e-05	0.186444	-5.36355	-2.42319	0.000412751	0.0034289	0.176235	-5.67424	-2.50443	0.000311433	0.00281289	1.00159	1.00159
1426851_a_at	Nov	nephroblastoma overexpressed gene	NM_010930	chr15:54745927-54753778 (+) // 96.1 // qD1 chr15:54745927-54753778 (+) // 96.1 // qD1 c	NCBI 38	207.747	396.396	114.578	386.442	586.677	147.072	122.61	107.172	173.454	157.198	81.0838	323.649	218.837	99.8532	63.8886	13.7956	211.313	321.867	114.632	130.274	191.95	29.6882	1.84341	1.84341	0.882377	0.256329	0.452459	2.80782	2.80782	1.48945	0.0664527	0.166664	4.3881	4.3881	2.1336	0.0132062	0.0546384	6.46554	6.46554	2.69277	0.00313196	0.0179121	1.52317	1.52317
1447937_a_at	4933409K07Rik /// Gm10590 /// Gm21093 /// Gm2192 /// Gm3893 /// Gm5859 /// Gm7819 /// LOC100041516 /// LOC101055653 /// LOC101056185 /// LOC101056212	RIKEN cDNA 4933409K07 gene /// predicted gene 10590 /// predicted gene, 21093 /// predi	NM_178649 /// NR_033123 /// NR_033506 /// XM_003945751 /// XM_003945752 /// XR_001565 /	chr4:41889607-42106512 (+) // 96.02 // qA5 /// chr4:42238848-42603842 (+) // 96.02 // q	NCBI 38	67.3817	75.8109	67.8767	88.1933	68.5059	53.3734	207.851	826.307	62.2117	82.3539	60.9304	73.9725	107.322	63.8389	199.007	60.9577	70.2531	68.5745	414.426	67.8365	79.7289	110.141	0.169519	-5.89905	-2.56048	0.000319884	0.00237914	0.165469	-6.04344	-2.59537	0.000284534	0.00216149	0.615907	-1.62362	-0.699216	0.207246	0.423325	0.72388	-1.38144	-0.466178	0.392169	0.632002	0.976108	-1.02448
1442903_at	4732423E21Rik	RIKEN cDNA 4732423E21 gene	---	chr18:69570187-69570762 (+) // 78.21 // qE2 chr18:69570187-69570762 (+) // 78.21 // qE2	NCBI 38	16.9984	20.7162	24.528	16.8259	17.1227	25.8547	139.38	121.86	23.5636	19.9262	39.7848	24.1866	22.7597	22.6444	29.0791	43.1086	20.5176	19.5297	130.326	26.5334	23.1864	35.4057	0.157433	-6.3519	-2.66719	4.22546e-07	1.42413e-05	0.149853	-6.67321	-2.73838	3.13334e-07	1.14612e-05	0.749416	-1.33437	-0.416161	0.168181	0.368647	0.654881	-1.527	-0.610695	0.0518335	0.158459	0.951851	-1.05058
1457917_at	Lck	lymphocyte protein tyrosine kinase	NM_001162432 /// NM_001162433 /// NM_010693	chr4:129548349-129573617 (-) // 93.86 // qD2.2 chr4:129556812-129557708 (-) // 74.51 //	NCBI 38	30.1484	23.6259	17.9148	28.4674	20.0626	22.7309	183.083	534.402	22.4001	23.6259	18.98	26.1036	24.7476	17.5802	104.11	77.2715	23.368	23.5026	312.794	21.5764	22.4777	89.6928	0.0747072	-13.3856	-3.74261	1.6184e-07	6.86656e-06	0.0751379	-13.3089	-3.73432	1.66031e-07	7.11805e-06	0.240559	-4.15698	-2.05554	9.133e-05	0.00103468	0.250609	-3.99028	-1.99649	0.000119682	0.00132169	1.00577	1.00577
1441115_at	D18Ertd232e	DNA segment, Chr 18, ERATO Doi 232, expressed	---	chr18:20966657-20967751 (+) // 17.78 // qA2 chr18:20966657-20967751 (+) // 17.78 // qA2	NCBI 38	18.1787	17.5101	16.5033	15.8849	14.7477	18.2403	107.818	182.289	16.7919	17.3963	17.8864	18.1073	16.425	15.4815	41.9352	38.956	17.3837	16.2273	140.193	17.3524	16.6363	40.4072	0.123998	-8.06464	-3.01161	5.37184e-10	9.46387e-08	0.11575	-8.63932	-3.11092	3.60172e-10	7.16545e-08	0.42944	-2.32861	-1.21947	1.69821e-05	0.000270544	0.411718	-2.42885	-1.28027	1.03185e-05	0.000187424	0.933481	-1.07126
1430579_at	Tnik	TRAF2 and NCK interacting kinase	NM_001163007 /// NM_001163008 /// NM_001163009 /// NM_026910	chr3:28359685-28360786 (+) // 74.95 // qA3 chr3:28630430-28665929 (+) // 92.92 // qA3 c	NCBI 38	26.364	24.9958	23.2438	22.6157	21.987	26.4562	79.3975	174.271	21.1823	24.2543	26.9385	25.3911	23.5676	22.7174	32.8241	36.4465	24.835	23.6066	117.63	24.0093	23.8663	34.5878	0.211128	-4.73646	-2.24381	5.38598e-07	1.69781e-05	0.200686	-4.9829	-2.31699	3.74752e-07	1.31941e-05	0.694153	-1.4406	-0.526674	0.0511625	0.155921	0.690019	-1.44923	-0.535292	0.0479825	0.149524	0.950543	-1.05203
1441600_at	C920021A13	uncharacterized protein C920021A13	---	--- ---	NCBI 38	22.4617	19.0509	17.5626	21.3088	19.0355	16.8939	547.17	880.494	19.2818	16.6835	15.8447	21.3997	16.4916	13.5105	233.047	178.938	19.5876	18.9941	694.105	17.2097	16.8311	204.207	0.02822	-35.4358	-5.14714	1.28175e-11	6.08509e-09	0.0273649	-36.5432	-5.19153	1.1508e-11	5.70356e-09	0.0842755	-11.8658	-3.56874	1.20536e-09	1.78826e-07	0.0824216	-12.1327	-3.60083	1.08029e-09	1.69641e-07	0.969697	-1.03125
1454881_s_at	Upk3b	uroplakin 3B	NM_175309	chr5:136042881-136045398 (+) // 92.67 // qG2 chr5:136042881-136045398 (+) // 92.67 // q	NCBI 38	8417.42	8159.07	8605.63	8510.45	8827.79	7477.54	1836.48	1648	7322.29	9243.9	4429.17	7307.42	9703.44	3087.14	893.344	301.777	8391.42	8250.7	1739.67	6692.83	6026.48	519.208	4.82375	4.82375	2.27016	0.000371947	0.00268575	4.74279	4.74279	2.24574	0.000407683	0.00287206	12.8901	12.8901	3.68819	3.33236e-06	7.56e-05	11.6072	11.6072	3.53695	5.2087e-06	0.000110032	0.983216	-1.01707
1419082_at	Serpinb2	serine (or cysteine) peptidase inhibitor, clade B, member 2	NM_001174170 /// NM_011111	chr1:107515461-107525599 (+) // 95.42 // qE2.1 chr1:107515461-107525599 (+) // 95.42 //	NCBI 38	266.93	491.127	283.445	242.984	283.839	169.723	394.049	171.837	344.13	418.499	297.156	263.373	240.61	287.37	114.29	53.1603	333.694	227.054	260.213	349.784	263.088	77.9458	1.28238	1.28238	0.358824	0.377881	0.583818	0.872568	-1.14604	-0.196661	0.625133	0.784107	4.48755	4.48755	2.16593	0.00010416	0.00114883	3.37528	3.37528	1.75501	0.000652157	0.00509139	0.680426	-1.46967
1456084_x_at	Fmod	fibromodulin	NM_021355	chr1:134037459-134048286 (+) // 99.73 // qE4 chr1:134047914-134048159 (+) // 70.83 // q	NCBI 38	1181.83	3309.98	782.032	1384.54	4360.55	1410.92	648.022	829.7	1154.93	4274.8	1215.61	1767.96	4484	1700.68	426.422	113.616	1451.67	2042.33	733.254	1817.32	2380.09	220.11	1.97981	1.97981	0.985362	0.235334	0.426737	2.78525	2.78525	1.47781	0.084824	0.200853	8.25623	8.25623	3.04548	0.00205448	0.0124408	10.8131	10.8131	3.43471	0.000822514	0.00615398	1.40682	1.40682
1427053_at	Abi3bp	ABI gene family, member 3 (NESH) binding protein	NM_001014399 /// NM_001014422 /// NM_001014423 /// NM_001014424 /// NM_178790	chr16:56575101-56690135 (+) // 97.72 // qC1.1 chr16:56575101-56690135 (+) // 97.72 // q	NCBI 38	25.6286	31.3902	13.6607	36.8494	32.2669	16.0318	141.331	115.579	29.775	20.036	11.3263	36.6798	19.977	13.391	40.5262	36.5538	22.233	26.713	127.791	18.9053	21.4088	38.4889	0.173979	-5.74781	-2.52301	0.000233521	0.00185358	0.209038	-4.78383	-2.25816	0.000599815	0.00390928	0.49119	-2.03587	-1.02565	0.0613838	0.178232	0.556232	-1.79781	-0.846241	0.114909	0.284066	1.20151	1.20151
1449015_at	Retnla	resistin like alpha	NM_020509	chr16:48842550-48844461 (+) // 86.06 // qB5 chr16:48842550-48844461 (+) // 86.06 // qB5	NCBI 38	63.9509	51.904	51.2734	67.8429	52.3381	41.8634	3262.83	2151.59	64.7197	51.119	48.8721	57.2955	57.2921	49.4268	1231.84	530.745	55.4175	52.9728	2649.49	54.4787	54.5414	808.576	0.0209157	-47.811	-5.57927	1.75671e-10	4.27607e-08	0.019993	-50.0175	-5.64436	1.52142e-10	3.98938e-08	0.0673763	-14.842	-3.89161	1.41943e-08	1.13305e-06	0.0674538	-14.825	-3.88996	1.42667e-08	1.16195e-06	0.955884	-1.04615
1440441_at	Fbxl7	F-box and leucine-rich repeat protein 7	NM_176959	chr15:26543473-26895580 (-) // 99.75 // qB1 chr15:26787620-26788261 (-) // 99.53 // qB1	NCBI 38	34.1393	42.9025	113.797	39.7445	41.6488	48.6599	243.51	737.079	37.2935	44.5254	73.3556	41.0317	66.4182	101.314	78.6936	220.892	55.0317	43.1856	423.639	49.5695	65.1155	131.84	0.129902	-7.69808	-2.9445	0.000315798	0.00235418	0.10194	-9.8097	-3.29421	0.000115975	0.00106191	0.375984	-2.65969	-1.41126	0.036467	0.120774	0.493899	-2.0247	-1.01771	0.116398	0.286397	0.784742	-1.2743
1430886_at	1700112E06Rik	RIKEN cDNA 1700112E06 gene	NM_028275	chr14:22019711-23056097 (+) // 99.46 // qA3 chr14:22019711-23056097 (+) // 99.46 // qA3	NCBI 38	218.62	377.318	515.763	253.82	376.953	533.294	580.028	786.985	311.556	414.669	641.078	289.795	351.327	567.963	612.7	74.1492	349.098	370.903	675.626	435.896	386.7	213.146	0.516704	-1.93534	-0.95259	0.189356	0.367651	0.548975	-1.82158	-0.865188	0.23051	0.416261	2.04506	2.04506	1.03214	0.157357	0.351997	1.81425	1.81425	0.859373	0.233485	0.459462	1.06246	1.06246
1440781_at	B830007D08Rik	RIKEN cDNA B830007D08 gene	---	chr9:100500796-100501112 (-) // 89.87 // qE3.3 chr9:100500796-100501112 (-) // 89.87 //	NCBI 38	50.8541	67.1721	113.953	43.0442	45.5822	123.135	210.811	226.428	43.3169	53.163	147.089	51.3499	62.2975	109.786	119.593	39.8265	73.015	62.2823	218.48	69.7079	70.5537	69.0141	0.334196	-2.99226	-1.58123	0.0249512	0.0789148	0.285071	-3.5079	-1.81061	0.0124019	0.0449393	1.01005	1.01005	0.0144267	0.981884	0.993649	1.0223	1.0223	0.0318186	0.960058	0.983814	0.853004	-1.17233
1457172_at	Arhgef15	Rho guanine nucleotide exchange factor (GEF) 15	NM_177566	chr11:68944167-68946448 (-) // 92.49 // qB3 chr11:68943156-68944226 (-) // 86.93 // qB3	NCBI 38	40.557	32.0593	49.619	36.1571	33.0283	80.4355	596.725	1465.92	33.0559	36.4059	48.1662	34.3064	38.0362	63.4844	203.724	431.093	40.1072	45.7976	935.277	38.701	43.5926	296.35	0.0428826	-23.3195	-4.54346	2.76843e-07	1.02764e-05	0.0489667	-20.422	-4.35206	4.51387e-07	1.51812e-05	0.130591	-7.65748	-2.93687	2.98592e-05	0.000420975	0.147098	-6.7982	-2.76515	5.37634e-05	0.000696777	1.14188	1.14188
1441058_at	Itpkb	inositol 1,4,5-trisphosphate 3-kinase B	NM_001081175	chr1:180423827-180424802 (+) // 97.4 // qH4 chr1:180337826-180338463 (+) // 79.87 // qH	NCBI 38	58.3175	81.6882	115.559	76.9157	71.729	113.48	1059.78	1985.28	76.0757	82.2465	133.308	76.6917	75.1665	111.667	494.205	427.997	81.9573	85.5479	1450.47	94.1324	86.3438	459.911	0.0565026	-17.6983	-4.14554	2.87311e-08	1.85911e-06	0.0589781	-16.9555	-4.08368	3.43212e-08	2.14097e-06	0.204676	-4.88578	-2.28859	2.06568e-05	0.000316241	0.187741	-5.3265	-2.41318	1.20467e-05	0.000210425	1.04381	1.04381
1452114_s_at	Igfbp5	insulin-like growth factor binding protein 5	NM_010518	chr1:72858036-72874886 (-) // 96.14 // qC3 chr1:72857929-72874869 (-) // 93.39 // qC3 c	NCBI 38	125.985	61.0956	198.825	107.718	51.9583	135.721	4461.98	5153.7	89.9563	68.4241	88.8923	91.3479	44.5673	72.129	2574.05	900.286	115.239	91.2422	4795.28	81.7904	66.4672	1522.26	0.0240313	-41.6124	-5.37894	2.04548e-07	8.20028e-06	0.0190271	-52.5565	-5.7158	1.01408e-07	4.86706e-06	0.0537283	-18.6122	-4.21817	3.07155e-06	7.11189e-05	0.0436626	-22.9029	-4.51746	1.45672e-06	4.13724e-05	0.791765	-1.263
1437260_at	Mmrn1	multimerin 1	NM_001163507 /// NM_027613	chr6:60927791-60946118 (+) // 92.8 // qB3 chr6:60988289-60989378 (+) // 99.91 // qB3 ch	NCBI 38	118.241	88.5713	82.1242	107.872	95.6308	86.8443	1118.02	2850.11	102.07	105.48	61.2573	103.784	105.989	52.2709	730.083	445.468	95.0991	96.4013	1785.11	87.0444	83.1538	570.285	0.0532747	-18.7706	-4.23041	1.30905e-07	5.85127e-06	0.054004	-18.5171	-4.21079	1.38134e-07	6.23623e-06	0.152634	-6.55164	-2.71185	1.68898e-05	0.000269359	0.145811	-6.85819	-2.77783	1.32192e-05	0.000226863	1.01369	1.01369
1427122_at	Copg2as2	coatomer protein complex, subunit gamma 2, antisense 2	NR_002845	chr6:30806943-30809199 (+) // 95.43 // qA3.3 chr6:30806943-30809199 (+) // 95.43 // qA3	NCBI 38	7.64718	7.54416	8.78285	7.96839	7.89078	9.07647	62.0728	81.0651	7.208	7.36966	8.07178	7.43821	7.95823	8.89705	24.5117	20.9784	7.97227	8.29476	70.9362	7.54066	8.07566	22.6764	0.112387	-8.89785	-3.15345	2.25147e-11	9.06639e-09	0.116932	-8.55195	-3.09626	2.83102e-11	1.11028e-08	0.332535	-3.0072	-1.58842	9.43963e-08	4.9194e-06	0.356126	-2.80799	-1.48954	1.98462e-07	9.05955e-06	1.04045	1.04045
1448962_at	Myh11	myosin, heavy polypeptide 11, smooth muscle	NM_001161775 /// NM_013607	chr16:14193723-14291363 (-) // 96.32 // qA1 chr16:14193723-14291363 (-) // 96.32 // qA1	NCBI 38	474.036	271.351	324.188	465.47	335.821	343.223	933.623	580.473	728.62	505.105	222.36	606.985	521.066	229.533	704.846	81.2425	346.783	377.117	736.188	434.129	417.152	239.306	0.47105	-2.12292	-1.08605	0.164828	0.333091	0.512254	-1.95216	-0.965069	0.213588	0.394667	1.81413	1.81413	0.859278	0.264961	0.497295	1.74318	1.74318	0.801722	0.296811	0.534839	1.08747	1.08747
1419663_at	Ogn	osteoglycin	NM_008760	chr13:49607989-49624504 (+) // 98.09 // qA5 chr13:49607989-49624504 (+) // 98.09 // qA5	NCBI 38	2605.48	2544.35	1486.76	3884.21	4358.48	2805.93	1322.11	445.172	2577.05	2238	1327.37	4042.93	3464.59	1083.23	704.528	89.6564	2144.02	3621.57	767.179	1970.85	2475.66	251.33	2.79473	2.79473	1.48271	0.0759015	0.186888	4.72072	4.72072	2.23901	0.0121723	0.0442195	7.8418	7.8418	2.97118	0.00197724	0.0120736	9.85022	9.85022	3.30016	0.000890371	0.00657335	1.68915	1.68915
1457198_at	Nrp1	neuropilin 1	NM_008737	chr8:128359031-128505471 (+) // 96.14 // qE2 chr8:128359031-128505471 (+) // 96.14 // q	NCBI 38	138.6	171.648	380.222	161.768	199.294	254.755	1321.97	2939.14	184.341	188.533	458.031	269.672	232.954	331.715	599.298	720.842	208.358	201.761	1971.12	251.557	275.183	657.264	0.105703	-9.46047	-3.24191	1.29749e-05	0.000191928	0.102356	-9.76978	-3.28833	1.12101e-05	0.000172261	0.382731	-2.6128	-1.3856	0.0121716	0.0512466	0.41868	-2.38846	-1.25608	0.0204484	0.0782954	0.968341	-1.03269
1420338_at	Alox15	arachidonate 15-lipoxygenase	NM_009660	chr11:70344146-70352017 (-) // 98.85 // qB3 chr11:70344146-70352017 (-) // 98.85 // qB3	NCBI 38	70.3348	63.2344	42.7066	73.5658	67.3486	54.0991	208.711	323.899	66.7777	60.8766	41.0662	61.8978	52.9457	35.3236	89.7008	86.0581	57.4829	64.476	260.002	55.0626	48.7368	87.8603	0.221086	-4.52312	-2.17732	6.11144e-06	0.000106135	0.247982	-4.03255	-2.01169	1.38964e-05	0.000204151	0.626703	-1.59565	-0.674146	0.0410433	0.132212	0.554706	-1.80276	-0.850205	0.0134377	0.056414	1.12165	1.12165
1442041_at	LOC552876	uncharacterized LOC552876	---	chr15:26707390-26708083 (-) // 89.32 // qB1 chr15:26707390-26708083 (-) // 89.32 // qB1	NCBI 38	18.5805	18.1806	48.0694	21.7036	21.4407	18.4135	54.7016	162.481	16.3671	21.4489	29.6185	18.5139	23.6584	24.4598	31.9015	31.9604	25.3201	20.4628	94.2689	21.8264	22.0452	31.9304	0.268593	-3.7231	-1.89651	0.00107693	0.00625106	0.217068	-4.60686	-2.20378	0.000314085	0.00233382	0.683558	-1.46293	-0.548864	0.246644	0.474958	0.69041	-1.44841	-0.534475	0.258608	0.489733	0.808165	-1.23737
1442213_at	LOC552908	uncharacterized LOC552908	---	chrX:123789232-123789969 (+) // 27.22 // qE3 chrX:123789232-123789969 (+) // 27.22 // q	NCBI 38	19.9409	19.6279	23.2313	21.3902	18.66	25.3112	36.0534	133.122	23.6506	24.3277	22.3836	19.7428	20.2579	28.0587	24.5533	22.8644	20.872	21.6178	69.2782	23.44	22.3884	23.6938	0.301277	-3.3192	-1.73084	0.000549068	0.00366379	0.312044	-3.20468	-1.68018	0.000699888	0.00440922	0.989288	-1.01083	-0.0155375	0.967963	0.988858	0.944907	-1.05831	-0.0817558	0.832777	0.927018	1.03574	1.03574
1423110_at	Col1a2	collagen, type I, alpha 2	NM_007743	chr6:4505713-4541535 (+) // 96.92 // qA1 chr6:4505713-4541535 (+) // 96.92 // qA1 chr6:	NCBI 38	17577	19091	15961	17400.5	18911	18082.4	684.299	138.944	15929.3	17927.9	13020.2	16263.8	18132.4	12827.8	217.67	51.4311	17495.5	18121.3	308.36	15492.7	15581	105.804	56.7378	56.7378	5.82624	1.97624e-07	7.99377e-06	58.7651	58.7651	5.87689	1.7892e-07	7.54863e-06	146.424	146.424	7.19401	1.67092e-08	1.27513e-06	147.261	147.261	7.20223	1.64815e-08	1.28827e-06	1.03573	1.03573
1438802_at	Foxp1	forkhead box P1	NM_001197321 /// NM_001197322 /// NM_053202	chr6:98929331-99266534 (-) // 92.4 // qD3 chr6:98929331-99266534 (-) // 92.4 // qD3 chr	NCBI 38	43.9083	44.1327	96.5483	31.8826	32.6173	61.4518	293.86	338.088	45.1787	42.1773	53.6211	53.2414	46.3405	57.1905	170.573	68.7177	57.1939	39.9801	315.199	46.7502	52.061	108.266	0.181453	-5.51105	-2.46233	4.38101e-05	0.000495049	0.126841	-7.88387	-2.97891	6.35749e-06	0.000110535	0.43181	-2.31583	-1.21153	0.0109359	0.0470763	0.480863	-2.07959	-1.0563	0.0225704	0.0844631	0.699029	-1.43056
1447407_at	Arap3	ArfGAP with RhoGAP domain, ankyrin repeat and PH domain 3	NM_001205336 /// NM_139206	chr18:37972632-37973022 (-) // 97.21 // qB3 --- --- chr18:37972627-37998908 (-) // 98.1	NCBI 38	26.9582	21.1392	68.2151	25.4404	29.4099	83.7689	309.916	562.561	33.4892	19.7978	119.669	54.1499	24.368	124.36	108.797	190.657	33.8755	39.7224	417.549	42.9701	54.7478	144.024	0.0811297	-12.3259	-3.62363	0.0007527	0.0047037	0.095132	-10.5117	-3.39393	0.00125779	0.00707151	0.298353	-3.35173	-1.74491	0.0547262	0.163848	0.380128	-2.6307	-1.39544	0.115125	0.284444	1.17259	1.17259
1440481_at	Stat1	signal transducer and activator of transcription 1	NM_001205313 /// NM_001205314 /// NM_009283	chr1:52119476-52161007 (+) // 93.31 // qC1.1 chr1:52121162-52121656 (+) // 23.93 // qC1	NCBI 38	35.7884	51.3447	75.5522	42.96	42.0282	49.3965	382.378	310.913	32.7961	61.0578	80.9134	49.6998	47.7422	61.0572	117.594	120.348	51.7749	44.6742	344.799	54.5123	52.5184	118.963	0.150159	-6.65959	-2.73544	2.1037e-06	4.7492e-05	0.129566	-7.71806	-2.94824	9.22333e-07	2.60151e-05	0.458231	-2.1823	-1.12585	0.00546132	0.0272769	0.441468	-2.26517	-1.17962	0.00402814	0.0219211	0.862858	-1.15894
1447938_at	Gm10590 /// Gm2192	predicted gene 10590 /// predicted gene 2192	XR_001565 /// XR_141429	chr4:41889607-42106512 (+) // 96.02 // qA5 /// chr4:42238848-42603842 (+) // 96.02 // q	NCBI 38	133.605	106.819	83.4539	131.107	108.728	81.3674	224.063	557.234	99.7847	118.813	90.0122	127.592	137.323	89.035	201.281	73.9889	106.004	105.069	353.376	102.191	115.979	122.035	0.299976	-3.3336	-1.73708	0.00137908	0.0076197	0.297327	-3.3633	-1.74988	0.00130465	0.00728229	0.837392	-1.19418	-0.256025	0.559861	0.769872	0.950373	-1.05222	-0.0734342	0.866342	0.942063	0.991171	-1.00891
1430089_at	5830469G19Rik	RIKEN cDNA 5830469G19 gene	---	chr4:129820746-129822053 (+) // 85.71 // qD2.2 chr4:129820746-129822053 (+) // 85.71 //	NCBI 38	202.645	213.121	392.781	162.454	178.727	269.747	1310.83	937.489	180.207	226.972	434.185	227.098	238.03	356.529	419.834	349.318	256.94	198.59	1108.58	260.901	268.113	382.949	0.231779	-4.31445	-2.10918	0.000108934	0.0010105	0.179144	-5.5821	-2.48081	2.27645e-05	0.000299942	0.681294	-1.4678	-0.553651	0.173715	0.376144	0.700129	-1.42831	-0.514307	0.204115	0.420011	0.772907	-1.29382
1442745_x_at	Rbm39	RNA binding motif protein 39	NM_133242	chr2:156147635-156180185 (-) // 72.97 // qH1 chr2:156147238-156167743 (-) // 97.76 // q	NCBI 38	244.885	197.316	381.487	169.122	188.474	260.86	611.201	974.015	196.376	218.177	391.336	269.031	207.672	265.953	238.331	298.922	264.16	202.59	771.568	255.947	245.841	266.906	0.342368	-2.92083	-1.54638	0.0005381	0.00360768	0.26257	-3.80851	-1.92923	7.55621e-05	0.00075654	0.958936	-1.04282	-0.0604936	0.860739	0.944369	0.921074	-1.08569	-0.118611	0.731446	0.875171	0.766922	-1.30391
1460187_at	Sfrp1	secreted frizzled-related protein 1	NM_013834	chr8:23411500-23448767 (+) // 94.85 // qA2 chr8:23448376-23449634 (+) // 95.37 // qA2 c	NCBI 38	900.829	929.929	886.014	1112.97	888.193	978.797	110.11	87.1762	829.155	648.593	832.587	1255.51	850.711	917.009	39.7768	28.8961	905.405	989.071	97.9742	765.023	993.09	33.9027	9.24123	9.24123	3.20808	7.30258e-10	1.20462e-07	10.0952	10.0952	3.3356	4.52147e-10	8.49679e-08	22.5653	22.5653	4.49603	1.10001e-11	4.96116e-09	29.2923	29.2923	4.87245	4.00206e-12	2.22836e-09	1.09241	1.09241
1424890_at	Bnc1	basonuclin 1	NM_007562	chr7:81966653-81992292 (-) // 99.83 // qD3 chr7:81966653-81992292 (-) // 99.83 // qD3	NCBI 38	2256.65	3173.47	2787.29	2199.55	3341.06	2346.8	195.797	196.527	1487.82	3028.09	1044.29	1763.86	3107.05	867.877	119.739	38.5067	2712.67	2583.66	196.16	1675.64	1681.69	67.9028	13.8286	13.8286	3.78958	1.26321e-05	0.000188276	13.1709	13.1709	3.71928	1.52976e-05	0.000220755	24.6767	24.6767	4.62508	1.51699e-06	4.10425e-05	24.7667	24.7667	4.63033	1.49825e-06	4.21275e-05	0.952439	-1.04994
1452670_at	Myl9	myosin, light polypeptide 9, regulatory	NM_172118	chr2:156775430-156781658 (+) // 95.23 // qH1 chr2:156775430-156781658 (+) // 95.23 // q	NCBI 38	11711.5	11402.3	8652.56	11788.5	12648.2	9556.83	2120.89	1296.86	12861.4	10802	6755.55	12183.3	11191.2	6662.42	1350.86	245.172	10493.4	11252.8	1658.43	9790.73	9684.76	575.495	6.32704	6.32704	2.66153	0.000294865	0.00222587	6.78511	6.78511	2.76237	0.000212827	0.00171559	17.0124	17.0124	4.08851	4.54212e-06	9.60403e-05	16.8284	16.8284	4.07283	4.73177e-06	0.000102501	1.0724	1.0724
1416114_at	Sparcl1	SPARC-like 1	NM_010097	chr5:104079107-104114130 (-) // 97.19 // qE5 chr5:104079107-104114130 (-) // 97.19 // q	NCBI 38	302.304	374.974	172.074	372.095	446.506	692.797	1942.41	766.488	322.304	964.295	439.014	483.046	1314.15	179.256	1307.49	138.899	269.188	486.441	1220.2	514.815	484.59	426.151	0.22061	-4.53289	-2.18043	0.0328408	0.0980386	0.398659	-2.50841	-1.32677	0.169717	0.335573	1.20805	1.20805	0.27268	0.769733	0.899115	1.13713	1.13713	0.185397	0.842123	0.93076	1.80707	1.80707
1417933_at	Igfbp6	insulin-like growth factor binding protein 6	NM_008344	chr15:102144361-102149511 (+) // 94.21 // qF2 chr15:102144361-102149511 (+) // 94.21 //	NCBI 38	4309.97	4640.18	4108.14	5177.76	6045.95	3934.76	2455.86	1427.69	4383.92	6600.84	2052.48	4666.17	6946.83	2080.96	1226.63	350.547	4347.29	4975.41	1872.56	3901.73	4070.81	655.74	2.32166	2.32166	1.21516	0.0593471	0.155085	2.65713	2.65713	1.40987	0.0322917	0.0953581	5.94996	5.94996	2.57288	0.000765321	0.00564922	6.20793	6.20793	2.63411	0.000632792	0.00497551	1.1445	1.1445
1438279_at	Dpp4	dipeptidylpeptidase 4	NM_001159543 /// NM_010074	chr2:62331628-62412231 (-) // 98.9 // qC1.3 chr2:62357703-62358652 (-) // 58.38 // qC1.	NCBI 38	145.86	117.047	94.9236	139.147	120.61	100.986	984.441	1864.82	121.837	112.922	83.4262	145.414	111.318	74.2619	360.563	625.017	117.46	119.226	1354.93	104.702	106.328	474.722	0.0866934	-11.5349	-3.52793	1.46947e-07	6.33601e-06	0.0879972	-11.364	-3.5064	1.57706e-07	6.89216e-06	0.220554	-4.53404	-2.1808	2.6912e-05	0.00038803	0.22398	-4.46468	-2.15856	2.97925e-05	0.000436116	1.01504	1.01504
1421335_a_at	Egfl7	EGF-like domain 7	NM_001164564 /// NM_178444 /// NM_198724 /// NM_198725	chr11:88068361-88082541 (+) // 60.26 // qC chr11:88068361-88082541 (+) // 60.26 // qC c	NCBI 38	105.768	158.194	530.289	137.731	240.566	539.795	1672.35	4164.86	128.651	115.819	472.198	107.926	167.366	527.437	794.231	1077.61	207.023	261.517	2639.23	191.619	211.993	925.135	0.0784431	-12.7481	-3.67221	0.000914762	0.00549343	0.0990913	-10.0917	-3.3351	0.00190223	0.00986122	0.207126	-4.82797	-2.27142	0.0202182	0.076428	0.229149	-4.36398	-2.12564	0.0278582	0.0991815	1.26322	1.26322
1446130_at	Mir1931	microRNA 1931	NR_035452	chr10:93162365-93163064 (+) // 73.86 // qC2 chr10:93162365-93163064 (+) // 73.86 // qC2	NCBI 38	64.3312	76.9508	121.151	47.0569	51.852	86.6433	466.848	508.368	56.9134	75.0541	105.667	63.7637	66.8382	103.517	194.275	150.589	84.3286	59.5694	487.146	76.7067	76.1246	171.036	0.173107	-5.77676	-2.53026	5.53736e-06	9.88288e-05	0.122282	-8.17779	-3.03172	7.74376e-07	2.28867e-05	0.448481	-2.22975	-1.15688	0.00495897	0.0252318	0.445079	-2.24679	-1.16787	0.00466358	0.0245916	0.706397	-1.41564
1435284_at	Rtn4	reticulon 4	NM_024226 /// NM_194051 /// NM_194052 /// NM_194053 /// NM_194054	chr11:29718569-29742115 (+) // 95.54 // qA3.3 chr11:29695871-29696703 (+) // 92.71 // q	NCBI 38	325.326	340.704	782.927	272.444	318.267	762.747	561.41	516.235	304.011	357.253	979.066	438.111	338.987	977.672	196.412	181.979	442.729	404.395	538.35	473.762	525.599	189.057	0.822385	-1.21598	-0.282114	0.641359	0.799148	0.751173	-1.33125	-0.412783	0.49768	0.686481	2.5059	2.5059	1.32533	0.0433414	0.137726	2.78009	2.78009	1.47513	0.0270616	0.0969888	0.913408	-1.0948
1439673_at	E230008O15Rik	RIKEN cDNA E230008O15 gene	XR_106454	chr5:32473561-32474281 (+) // 75.59 // qB1 chr5:32473561-32474281 (+) // 75.59 // qB1 c	NCBI 38	30.3178	47.3541	74.5313	30.8854	32.4638	68.8461	193.105	187.57	42.3503	40.8466	71.5199	40.2075	29.6044	71.2197	58.328	76.9632	47.4751	41.0213	190.318	49.8289	43.9293	67.001	0.249451	-4.0088	-2.00317	0.000682894	0.00434894	0.215542	-4.63947	-2.21396	0.000295054	0.00222529	0.743704	-1.34462	-0.4272	0.36098	0.602783	0.655654	-1.52519	-0.608993	0.200202	0.414873	0.864064	-1.15732
1440091_at	Meis2	Meis homeobox 2	NM_001136072 /// NM_001159567 /// NM_001159568 /// NM_001159569 /// NM_001159570 /// NM	chr2:115863068-116065113 (-) // 94.43 // qE4 chr2:115996069-115996711 (-) // 98.75 // q	NCBI 38	47.6608	46.5563	173.431	33.2255	54.0957	116.945	384.676	977	63.3321	58.0915	77.1572	45.0493	48.5824	90.9945	165.618	282.248	72.7371	59.4572	613.045	65.7209	58.3973	216.207	0.118648	-8.42827	-3.07524	0.000301107	0.00226602	0.0969865	-10.3107	-3.36607	0.000134749	0.00119869	0.303973	-3.28977	-1.71798	0.0171313	0.067046	0.2701	-3.70234	-1.88843	0.0102035	0.0455089	0.817428	-1.22335
1430058_at	Slbp	stem-loop binding protein	NM_009193	chr5:33648661-33652353 (-) // 51.08 // qB2 chr5:33648661-33652353 (-) // 51.08 // qB2 c	NCBI 38	96.6442	104.339	159.851	103.853	109.297	176.48	414.133	682.798	82.5044	145.183	150.994	98.8448	122.735	152.68	183.872	193.422	117.278	126.077	531.874	121.868	122.828	188.635	0.2205	-4.53515	-2.18115	2.11629e-05	0.000280974	0.237044	-4.21863	-2.07677	3.44821e-05	0.000412623	0.646052	-1.54786	-0.630278	0.0832252	0.223398	0.651141	-1.53576	-0.618958	0.0883446	0.235	1.07503	1.07503
1441779_at	9530006C21Rik	RIKEN cDNA 9530006C21 gene	---	chr8:33928166-33928608 (-) // 98.66 // qA4 chr8:33928166-33928608 (-) // 98.66 // qA4	NCBI 38	91.06	129.804	218.277	90.4874	128.881	292.622	561.926	899.689	95.8801	154.927	230.708	127.753	177.28	217.804	213.898	297.547	137.154	150.555	711.027	150.766	170.229	252.28	0.192896	-5.18415	-2.3741	0.0004133	0.00292253	0.211743	-4.72271	-2.23961	0.000669973	0.00426158	0.597619	-1.67331	-0.742702	0.163902	0.362219	0.674764	-1.482	-0.567545	0.279838	0.515922	1.09771	1.09771
1416454_s_at	Acta2	actin, alpha 2, smooth muscle, aorta	NM_007392	chr19:34240923-34255320 (-) // 95.81 // qC1 chr19:34240923-34255320 (-) // 95.81 // qC1	NCBI 38	26156.8	24338.3	24689.9	25889.2	25100.4	24339.4	6972.15	5122.73	27570.3	25100.8	22121.6	26067.2	25119.2	22901	5716.71	811.747	25047.9	25100	5976.15	24830.1	24658.5	2154	4.19136	4.19136	2.06742	0.00178319	0.00935595	4.2001	4.2001	2.07042	0.00176419	0.0092757	11.5268	11.5268	3.52692	1.57377e-05	0.000254953	11.4477	11.4477	3.51699	1.61965e-05	0.00026621	1.00209	1.00209
1419426_s_at	Ccl21a /// Ccl21b /// Ccl21c /// Gm10591 /// Gm13304 /// Gm1987 /// Gm21541 /// LOC100041504 /// LOC100041593	chemokine (C-C motif) ligand 21A (serine) /// chemokine (C-C motif) ligand 21B (leucine	NM_001193666 /// NM_001193667 /// NM_001193668 /// NM_001270360 /// NM_011124 /// NM_01	chr4:41903648-41904742 (+) // 94.25 // qA5 /// chr4:42114822-42115916 (+) // 94.25 // q	NCBI 38	97.6106	82.658	67.6558	89.4737	108.756	75.0067	1819.54	6117.71	83.5447	88.7481	73.4255	85.6373	90.3347	61.5847	1290.46	1124.89	81.7264	90.036	3336.45	81.6533	78.1021	1204.82	0.0244956	-40.8237	-5.35133	3.13181e-09	3.54894e-07	0.0269862	-37.056	-5.21163	4.31497e-09	4.5258e-07	0.0677717	-14.7554	-3.88317	1.40955e-07	6.74862e-06	0.0648241	-15.4264	-3.94733	1.16603e-07	5.91554e-06	1.10168	1.10168
1455160_at	2610203C20Rik	RIKEN cDNA 2610203C20 gene	NM_001033153 /// NR_015483	chr9:41591556-41592829 (+) // 98.45 // qA5.1 chr9:41591556-41592829 (+) // 98.45 // qA5	NCBI 38	1684.56	1798.17	2197.84	1585.25	1698.8	2237.39	70.6482	136.735	1112.11	2134.23	1766.98	2215	2106.43	1788.44	25.8689	48.7276	1881.15	1819.72	98.2857	1612.63	2028.22	35.504	19.1402	19.1402	4.25853	1.26164e-08	9.91311e-07	18.514	18.514	4.21054	1.44459e-08	1.12331e-06	45.4212	45.4212	5.50529	5.57968e-10	9.79693e-08	57.1275	57.1275	5.83611	2.71687e-10	5.72586e-08	0.967287	-1.03382
1419017_at	Corin	corin	NM_001122756 /// NM_016869	chr5:72299947-72504234 (-) // 98.57 // qC3.2 chr5:72299947-72504234 (-) // 98.57 // qC3	NCBI 38	14.251	12.0713	14.1397	13.6059	12.7092	12.5858	54.7572	83.1488	12.839	12.8425	11.5179	12.803	14.0773	15.9511	41.0934	14.4924	13.4487	12.9592	67.4759	12.3837	14.2191	24.4037	0.199311	-5.01729	-2.32691	6.30055e-06	0.000108458	0.192056	-5.20682	-2.3804	4.95525e-06	9.255e-05	0.507451	-1.97063	-0.97866	0.0089612	0.0403796	0.582663	-1.71626	-0.779266	0.0294707	0.103581	0.9636	-1.03778
1457292_at	Taf1d	TATA box binding protein (Tbp)-associated factor, RNA polymerase I, D	NM_026541 /// NM_027261 /// NM_029248 /// NR_028401	chr9:15307725-15312104 (+) // 94.41 // qA2 chr9:15307745-15316970 (+) // 92.34 // qA2 c	NCBI 38	298.148	374.584	581.368	268.235	369.75	525.995	242.824	465.22	229.576	357.478	497.96	383.043	375.13	465.233	79.3517	187.696	401.924	373.657	336.112	344.447	405.846	122.041	1.1958	1.1958	0.257976	0.567963	0.746031	1.11171	1.11171	0.15278	0.73416	0.85794	2.8224	2.8224	1.49692	0.00481003	0.0246264	3.32549	3.32549	1.73357	0.00173563	0.0112018	0.929672	-1.07565
1446558_at	Dennd4a	DENN/MADD domain containing 4A	NM_001162917 /// NM_176935	chr9:64918758-64919666 (+) // 99.56 // qC --- ---	NCBI 38	16.5312	17.0445	19.6154	15.8867	21.4233	19.7832	118.672	132.672	15.8867	15.9101	21.4883	14.9997	18.0713	25.16	58.2917	36.0566	17.6805	18.8831	125.477	17.578	18.9639	45.8452	0.140906	-7.09692	-2.8272	4.05144e-08	2.42984e-06	0.15049	-6.64496	-2.73226	6.05195e-08	3.32055e-06	0.383419	-2.60811	-1.38301	8.88025e-05	0.00101087	0.413649	-2.41751	-1.27352	0.000188944	0.00189536	1.06801	1.06801
1422454_at	Krt13	keratin 13	NM_010662	chr11:100117324-100121566 (-) // 91.5 // qD chr11:100117324-100121566 (-) // 91.5 // qD	NCBI 38	16.1506	15.4107	13.1581	15.5515	17.4275	14.3666	97.4776	14.4222	14.4163	15.9676	12.4575	14.8967	14.9408	13.0574	13.8252	13.6076	14.8503	15.7321	37.4946	14.2072	14.2705	13.7159	0.396065	-2.52484	-1.33619	0.0227416	0.0734667	0.419584	-2.38331	-1.25297	0.0307813	0.0919443	1.03582	1.03582	0.0507733	0.92323	0.970529	1.04043	1.04043	0.0571799	0.913571	0.962934	1.05938	1.05938
1437676_at	Spag9	sperm associated antigen 9	NM_001025428 /// NM_001025429 /// NM_001025430 /// NM_001199203 /// NM_001199204 /// NM	chr11:94048422-94094229 (+) // 90.37 // qD chr11:94097805-94126087 (+) // 97.27 // qD c	NCBI 38	26.0794	24.4606	68.9667	27.7387	22.269	76.6899	173.439	223.994	27.8239	31.9009	62.1548	25.2884	24.0835	53.3907	64.251	82.0802	35.3023	36.1832	197.102	38.0683	31.918	72.6208	0.179106	-5.58329	-2.48111	0.000851385	0.00520232	0.183576	-5.44733	-2.44555	0.000954258	0.00565162	0.52421	-1.90763	-0.931783	0.128879	0.306652	0.439518	-2.27522	-1.18601	0.0596381	0.176319	1.02496	1.02496
1427884_at	Col3a1	collagen, type III, alpha 1	NM_009930	chr1:45311605-45349852 (+) // 99.45 // qC1.1 chr1:45311605-45349852 (+) // 99.45 // qC1	NCBI 38	3831.37	6235.35	3382.72	4472.43	7762.62	3575.32	613.713	143.445	3141.61	5427.52	1831.88	4236.47	6809.48	1725.3	212.177	56.42	4323.25	4988.53	296.704	3149.27	3678.5	109.398	14.5712	14.5712	3.86505	0.00017682	0.0014801	16.8127	16.8127	4.07148	0.000110052	0.00102027	28.7876	28.7876	4.84738	2.03837e-05	0.000312909	33.6243	33.6243	5.07143	1.28789e-05	0.000221894	1.15383	1.15383
1453244_at	5830416P10Rik	RIKEN cDNA 5830416P10 gene	NR_028427	chr19:53461642-53464796 (-) // 81.98 // qD2 chr19:53461642-53464796 (-) // 81.98 // qD2	NCBI 38	27.43	23.9642	27.3269	28.496	24.6887	25.2063	97.9481	181.754	23.1017	19.6372	25.5297	25.3569	21.9939	27.3269	47.9929	50.4477	26.1894	26.0774	133.425	22.6251	24.793	49.2049	0.196285	-5.09464	-2.34898	7.0983e-08	3.67555e-06	0.195445	-5.11654	-2.35517	6.88334e-08	3.66091e-06	0.459812	-2.1748	-1.12088	0.000172968	0.00171942	0.503872	-1.98463	-0.988871	0.000511541	0.00421157	0.99572	-1.0043
1423505_at	Tagln	transgelin	NM_011526	chr9:45929631-45936058 (-) // 96.49 // qA5.2 chr9:45929631-45936058 (-) // 96.49 // qA5	NCBI 38	22668.3	19779.4	21497.6	20791	21052.4	19478.7	2370.72	1885.16	23872.1	20923.7	17137.3	21792	21061.2	18354.9	1563.52	389.161	21279.8	20427.1	2113.91	20454.1	20346.6	779.989	10.0669	10.0669	3.33155	1.28279e-06	3.31929e-05	9.6634	9.6634	3.27253	1.56149e-06	3.86949e-05	26.2233	26.2233	4.71278	2.38724e-08	1.69081e-06	26.085	26.085	4.70515	2.43392e-08	1.71519e-06	0.959914	-1.04176
1446272_at	Cdk17	cyclin-dependent kinase 17	NM_146239	chr10:93235436-93241534 (+) // 95.35 // qC2 chr10:93231262-93231942 (+) // 100.0 // qC2	NCBI 38	42.3415	64.3646	102.996	32.8719	63.8261	55.8465	194.174	457.293	33.0559	52.1962	87.7961	48.5334	50.3129	79.6856	95.4254	127.238	65.4754	48.9335	297.984	53.3073	57.9473	110.189	0.219728	-4.55108	-2.18621	0.000612024	0.00399174	0.164215	-6.08957	-2.60634	0.000133324	0.00118952	0.483779	-2.06706	-1.04758	0.0505204	0.154476	0.525887	-1.90155	-0.927175	0.0788041	0.216215	0.747357	-1.33805
1455466_at	Gpr133	G protein-coupled receptor 133	NM_001081342 /// NM_177734	chr5:129203929-129204599 (+) // 90.9 // qG1.3 chr5:129203929-129204599 (+) // 90.9 // q	NCBI 38	1284.5	1687.21	324.694	1286.52	1696.49	363.636	249.55	259.118	816.104	2186.72	98.3185	857.801	2603.78	129.617	126.737	69.934	889.463	925.86	254.288	559.832	661.533	94.1448	3.49783	3.49783	1.80646	0.192449	0.372071	3.64097	3.64097	1.86432	0.179508	0.349549	5.9465	5.9465	2.57204	0.0722261	0.201211	7.02675	7.02675	2.81286	0.0519442	0.158672	1.04092	1.04092
1418726_a_at	Tnnt2	troponin T2, cardiac	NM_001130174 /// NM_001130175 /// NM_001130176 /// NM_001130177 /// NM_001130178 /// NM	chr1:135836404-135852265 (+) // 96.94 // qE4 chr1:135836404-135852265 (+) // 96.94 // q	NCBI 38	209.319	207.7	131.53	297.183	419.527	305.116	188.786	103.66	157.403	168.681	295.932	257.347	301.849	208.148	146.36	18.4046	178.824	336.32	139.891	198.805	252.87	51.901	1.27831	1.27831	0.354238	0.582311	0.757066	2.40415	2.40415	1.26553	0.0652252	0.164535	3.83049	3.83049	1.93753	0.00877722	0.0397491	4.87216	4.87216	2.28456	0.00305285	0.0175477	1.88073	1.88073
1448421_s_at	Aspn	asporin	NM_001172481 /// NM_025711	chr13:49544442-49567560 (+) // 99.11 // qA5 chr13:49544442-49567560 (+) // 99.11 // qA5	NCBI 38	16.9579	21.5937	12.7626	20.9552	27.2466	21.9623	231.005	26.8451	25.5393	31.7211	13.0621	25.639	45.0375	16.0962	111.268	7.73527	16.719	23.2323	78.7485	21.9544	26.489	29.3374	0.212309	-4.71011	-2.23576	0.0397237	0.113669	0.295019	-3.38961	-1.76112	0.0949599	0.218509	0.748342	-1.33629	-0.41823	0.675701	0.845423	0.902907	-1.10753	-0.147351	0.882467	0.94962	1.38957	1.38957
1442494_at	C79242	expressed sequence C79242	---	chr17:47008013-47008841 (-) // 81.16 // qC chr17:47008013-47008841 (-) // 81.16 // qC	NCBI 38	47.6472	57.4426	71.1943	44.7964	55.8637	89.0288	186.803	220.684	38.6234	62.5254	63.5544	71.9496	57.9501	83.8342	85.9261	66.6904	57.9746	60.6224	203.039	53.5405	70.4423	75.6999	0.285536	-3.50218	-1.80826	4.50883e-05	0.000506305	0.298577	-3.34922	-1.74383	6.39243e-05	0.000661857	0.707278	-1.41387	-0.499651	0.120346	0.291798	0.930552	-1.07463	-0.103841	0.73511	0.877344	1.04567	1.04567
1440847_at	Mtss1	metastasis suppressor 1	NM_001146180 /// NM_144800	chr15:58941796-59082022 (-) // 97.54 // qD1 chr15:58941235-58942429 (-) // 98.18 // qD1	NCBI 38	97.3138	111.436	176.928	89.8057	82.83	122.007	575.188	661.222	107.36	104.375	177.504	111.472	107.728	146.61	194.819	272.898	124.248	96.8151	616.736	125.757	120.742	230.554	0.20146	-4.96377	-2.31143	3.12022e-06	6.41116e-05	0.15698	-6.37025	-2.67135	6.34956e-07	1.9777e-05	0.545461	-1.83331	-0.874452	0.0112684	0.0482545	0.523703	-1.90948	-0.933179	0.00770849	0.0365959	0.779212	-1.28335
1439943_at	Vps54	vacuolar protein sorting 54 (yeast)	NM_139061	chr11:21239280-21321133 (+) // 99.49 // qA3.1 chr11:21277993-21278614 (+) // 99.84 // q	NCBI 38	14.284	15.0406	23.6343	12.3974	17.4771	16.4579	42.1915	58.9001	15.7091	16.4789	20.8252	15.3716	13.7708	26.0267	19.0043	18.3962	17.1878	15.2777	49.8506	17.5343	17.6617	18.6978	0.344786	-2.90035	-1.53623	0.000147507	0.0012806	0.30647	-3.26296	-1.70618	5.53021e-05	0.000592864	0.937775	-1.06635	-0.0926863	0.753933	0.890114	0.944586	-1.05866	-0.0822459	0.780807	0.901241	0.888871	-1.12502
1456446_at	4930523C07Rik	RIKEN cDNA 4930523C07 gene	NM_001024470 /// NM_001162896 /// NR_028111	chr1:160044412-160071994 (+) // 89.74 // qH1 chr1:160075347-160076018 (+) // 88.24 // q	NCBI 38	37.4204	42.5621	52.0812	32.9758	34.3284	40.7653	467.332	331.783	30.7218	50.6071	45.4578	35.8899	57.0953	57.2942	248.297	88.8268	43.6119	35.8686	393.767	41.345	48.9661	148.51	0.110755	-9.02892	-3.17456	1.13796e-06	3.02434e-05	0.0910905	-10.9781	-3.45656	4.39136e-07	1.48578e-05	0.278397	-3.592	-1.84478	0.000261128	0.00238307	0.329713	-3.03294	-1.60072	0.000853696	0.0063546	0.822449	-1.21588
1434390_at	AI503316	expressed sequence AI503316	---	chr1:178321107-178326129 (-) // 96.57 // qH4 chr1:178321107-178326129 (-) // 96.57 // q	NCBI 38	186.929	341.198	356.572	215.743	303.081	421.466	277.922	398.877	156.397	329.183	394.088	290.61	353.709	368.174	62.282	255.97	283.32	302.056	332.952	272.743	335.74	126.263	0.850933	-1.17518	-0.232883	0.671053	0.818853	0.907204	-1.10229	-0.140501	0.797319	0.895225	2.16012	2.16012	1.11111	0.0587911	0.172694	2.65906	2.65906	1.41092	0.0208282	0.0794082	1.06613	1.06613
1459966_at	Osbpl7	oxysterol binding protein-like 7	NM_001081434	chr11:97059084-97068904 (+) // 97.66 // qD chr11:97052909-97053342 (+) // 12.01 // qD c	NCBI 38	54.901	103.423	140.86	75.774	102.612	170.775	108.696	143.988	43.192	104.871	169.16	114.396	108.454	148.384	31.4367	71.8539	92.8243	109.912	125.104	91.5064	122.56	47.5275	0.741979	-1.34775	-0.43055	0.449996	0.650073	0.878575	-1.13821	-0.186763	0.740835	0.862433	1.92535	1.92535	0.945121	0.111212	0.275622	2.57872	2.57872	1.36666	0.028151	0.0999793	1.1841	1.1841
1429969_at	4833403J16Rik	RIKEN cDNA 4833403J16 gene	---	chr6:48755337-48756368 (+) // 21.37 // qB2.3 chr6:48755337-48756368 (+) // 21.37 // qB2	NCBI 38	15.3915	13.9482	13.6052	13.8682	13.4891	14.9185	174.618	186.127	16.3921	13.8211	17.867	13.985	15.32	17.5423	156.948	30.0271	14.2947	14.0791	180.281	15.9372	15.5478	68.6492	0.0792913	-12.6117	-3.65669	2.10723e-06	4.75191e-05	0.0780954	-12.8049	-3.67862	1.97452e-06	4.62371e-05	0.232156	-4.30746	-2.10683	0.000454517	0.00370422	0.226484	-4.41533	-2.14252	0.000394506	0.00340515	0.984917	-1.01531
1429060_at	Malat1	metastasis associated lung adenocarcinoma transcript 1 (non-coding RNA)	NR_002847	chr11:101246423-101248246 (+) // 47.74 // qD chr11:101246423-101248246 (+) // 47.74 //	NCBI 38	1108.68	1605.96	2388.06	1280.86	1908.56	2425.28	908.558	1267.75	733.022	2458.38	2888.05	1712.37	2661.3	2584.1	370.404	454.999	1620.02	1809.91	1073.2	1732.93	2275.08	410.526	1.5095	1.5095	0.594071	0.260904	0.457933	1.68642	1.68642	0.753964	0.159696	0.32125	4.22132	4.22132	2.07769	0.00125145	0.00839281	5.5419	5.5419	2.47038	0.000305001	0.00276444	1.1172	1.1172
1430415_at	Phf6	PHD finger protein 6	NM_027642	chrX:52912239-52913396 (+) // 99.65 // qA5 chrX:52912239-52913396 (+) // 99.65 // qA5 c	NCBI 38	104.927	123.619	164.221	94.6973	118.286	190.297	558.843	551.977	114.476	134.825	148.572	123.023	122.687	142.521	230.097	196.679	128.667	128.697	555.399	131.868	129.089	212.733	0.231666	-4.31656	-2.10988	1.73922e-06	4.14153e-05	0.231719	-4.31557	-2.10955	1.74223e-06	4.20643e-05	0.619879	-1.61322	-0.689941	0.018502	0.0713517	0.606811	-1.64796	-0.720681	0.0147226	0.0606786	1.00023	1.00023
1431708_a_at	Tia1	cytotoxic granule-associated RNA binding protein 1	NM_001164078 /// NM_001164079 /// NM_011585	chr6:86404275-86432796 (+) // 99.24 // qD1 chr6:86404275-86432796 (+) // 99.24 // qD1 c	NCBI 38	136.344	199.902	354.976	159.683	236.933	363.15	113.773	230.723	102.988	210.041	313.782	214.385	247.44	322.88	33.8829	113.93	213.084	239.51	162.019	189.339	257.772	62.1314	1.31518	1.31518	0.39526	0.514534	0.705921	1.47828	1.47828	0.56392	0.356557	0.558009	3.04741	3.04741	1.60758	0.0174568	0.0680956	4.14883	4.14883	2.0527	0.00412362	0.0223104	1.12402	1.12402
1430585_at	5930436O19Rik	RIKEN cDNA 5930436O19 gene	---	chr17:88057627-88059160 (-) // 72.88 // qE4 chr17:88057627-88059160 (-) // 72.88 // qE4	NCBI 38	48.8605	56.6056	107.35	47.4071	54.3049	93.2703	301.672	309.121	69.1426	54.8655	116.937	60.3182	58.9752	115.61	165.51	83.0552	66.7123	62.1551	305.373	76.2661	74.3654	117.246	0.218461	-4.57747	-2.19455	0.000315886	0.00235445	0.203537	-4.91311	-2.29664	0.000212219	0.00171283	0.650485	-1.53731	-0.620412	0.192045	0.402463	0.634272	-1.57661	-0.656826	0.168908	0.370973	0.931685	-1.07332
1430195_at	2810043O03Rik	RIKEN cDNA 2810043O03 gene	---	chr9:71983827-71985673 (-) // 78.45 // qD chr9:71983827-71985673 (-) // 78.45 // qD	NCBI 38	33.5389	45.3224	115.228	32.9627	42.9637	101.449	507.689	383.875	62.593	40.4412	90.0499	52.4474	43.8181	82.6848	186.876	154.184	55.9509	52.3751	441.463	61.0864	57.4912	169.744	0.12674	-7.89019	-2.98006	0.000107208	0.000998385	0.11864	-8.42887	-3.07534	7.98986e-05	0.000791806	0.359872	-2.77877	-1.47444	0.0176919	0.0687745	0.338692	-2.95254	-1.56195	0.0130084	0.0549957	0.93609	-1.06827
1449361_at	Tbx21	T-box 21	NM_019507	chr11:97098006-97115328 (-) // 99.92 // qD chr11:97098006-97115328 (-) // 99.92 // qD	NCBI 38	23.8188	20.3043	19.1035	24.086	17.4961	19.6315	1281.02	1505.71	23.2679	22.0683	18.2621	28.9346	24.9524	17.8382	823.293	347.72	20.9833	20.2249	1388.78	21.0876	23.4402	535.046	0.0151087	-66.1872	-6.04848	4.9023e-11	1.63777e-08	0.0145626	-68.669	-6.10159	4.39567e-11	1.59878e-08	0.0394124	-25.3727	-4.66521	1.2152e-09	1.79107e-07	0.0438094	-22.8261	-4.51262	1.82396e-09	2.4928e-07	0.963859	-1.0375
1439094_at	Cltc	clathrin, heavy polypeptide (Hc)	NM_001003908	chr11:86723277-86724187 (-) // 43.91 // qC chr11:86723277-86724187 (-) // 43.91 // qC c	NCBI 38	188.86	252.558	388.172	180.77	228.709	421.297	406.416	658.305	174.953	195.306	478.098	275.646	226.836	377.909	124.36	320.246	264.551	259.219	517.24	253.737	286.957	199.564	0.511464	-1.95517	-0.967295	0.0867042	0.206585	0.501156	-1.99539	-0.996668	0.0785484	0.189444	1.27146	1.27146	0.346486	0.518194	0.740177	1.43792	1.43792	0.523983	0.333572	0.573672	0.979846	-1.02057
1425362_at	Agfg2	ArfGAP with FG repeats 2	NM_145566 /// NM_178162	chr5:137662825-137684726 (-) // 84.17 // qG2 chr5:137662825-137684726 (-) // 84.17 // q	NCBI 38	63.4142	87.2593	133.692	60.4729	63.8261	102.45	192.561	398.831	47.6752	90.5588	142.572	89.6288	93.4057	123.975	73.374	155.86	90.4444	73.3991	277.126	85.0654	101.247	106.939	0.326365	-3.06405	-1.61544	0.00538476	0.0230448	0.264857	-3.77562	-1.91671	0.00165183	0.00878972	0.795452	-1.25715	-0.330153	0.50682	0.731897	0.946774	-1.05622	-0.078908	0.872896	0.944978	0.811536	-1.23223
1456629_at	Kank3	KN motif and ankyrin repeat domains 3	NM_030697	chr17:33822019-33822915 (+) // 87.62 // qB1 chr17:33810522-33822920 (+) // 98.62 // qB1	NCBI 38	51.4109	58.0915	126.886	45.5191	69.3923	127.806	679.672	1235.64	55.0116	50.4987	136.522	73.6675	58.5938	139.267	288.641	434.45	72.365	73.907	916.423	72.3846	84.397	354.099	0.0789646	-12.6639	-3.66265	2.14187e-05	0.000283619	0.0806472	-12.3997	-3.63223	2.3287e-05	0.000305061	0.204418	-4.89193	-2.29041	0.00138126	0.00906258	0.238341	-4.19566	-2.0689	0.00289238	0.0167997	1.02131	1.02131
1438296_at	Slc2a4rg-ps	Slc2a4 regulator, pseudogene	NR_045164	chr2:181386626-181387596 (+) // 98.77 // qH4 chr2:181386626-181387596 (+) // 98.77 // q	NCBI 38	102.798	122.949	172.61	95.562	132.714	187.653	209.485	533.106	69.8419	134.989	202.412	139.425	167.672	208.885	115.744	145.202	129.695	133.511	334.182	124.036	169.656	129.638	0.388098	-2.57667	-1.36551	0.0107141	0.0402112	0.399518	-2.50301	-1.32367	0.0127593	0.0459227	0.956787	-1.04516	-0.0637303	0.891471	0.957345	1.30869	1.30869	0.388123	0.412179	0.649761	1.02943	1.02943
1441045_at	Ddx43	DEAD (Asp-Glu-Ala-Asp) box polypeptide 43	NM_001191044	chr9:78418119-78423587 (+) // 97.91 // qE1 chr9:78418119-78423587 (+) // 97.91 // qE1	NCBI 38	19.5725	18.3984	22.9017	23.1665	21.7651	26.2784	73.4202	184.678	18.6467	17.7764	25.1486	20.8961	18.8312	17.8835	52.3433	39.17	20.2037	23.6631	116.444	20.2763	19.1631	45.2802	0.173507	-5.76347	-2.52693	1.31036e-06	3.37127e-05	0.203216	-4.92088	-2.29891	3.66336e-06	7.3497e-05	0.447795	-2.23316	-1.15909	0.00193604	0.011882	0.423212	-2.36288	-1.24055	0.00116296	0.00810547	1.17123	1.17123
1444962_at	Gm7609	predicted pseudogene 7609	NM_001081746	chr1:85202137-85214420 (+) // 87.36 // qC5 /// chr1:85539027-85551208 (+) // 87.88 // q	NCBI 38	41.8019	31.366	24.5367	38.0055	32.5107	29.362	93.4813	218.985	34.0974	39.228	29.114	41.0317	38.445	27.3203	60.3523	51.5145	31.8047	33.1046	143.077	33.8955	35.0604	55.7581	0.222292	-4.49859	-2.16947	1.36889e-05	0.000200033	0.231377	-4.32195	-2.11168	1.80166e-05	0.000249406	0.607899	-1.64501	-0.718096	0.0429415	0.136781	0.628794	-1.59034	-0.669341	0.0567122	0.169603	1.04087	1.04087
1460016_at	Tmem164	transmembrane protein 164	NM_001199357 /// NM_001199360 /// NM_177592	chrX:142835406-142838375 (+) // 97.62 // qF2 chrX:142835406-142838375 (+) // 97.62 // q	NCBI 38	60.0101	76.2287	112.815	83.4673	86.3562	84.6595	272.865	248.485	87.5504	88.1552	128.249	84.0096	96.8101	116.086	91.7072	112.469	80.2117	84.8193	260.39	99.6598	98.1013	101.559	0.308044	-3.24629	-1.69879	1.08104e-05	0.000166403	0.32574	-3.06993	-1.61821	1.77686e-05	0.000246836	0.981297	-1.01906	-0.0272382	0.91308	0.966327	0.965955	-1.03524	-0.0499721	0.841367	0.930408	1.05745	1.05745
1457508_at	C430003N24Rik	RIKEN cDNA C430003N24 gene	---	chr10:108184246-108184916 (+) // 98.52 // qD1 chr10:108184246-108184916 (+) // 98.52 //	NCBI 38	51.7672	67.7358	114.118	52.7617	52.5485	70.9701	240.788	251.972	105.518	77.3635	113.188	85.655	62.0612	78.8337	101.848	91.2855	73.6902	58.1634	246.317	97.3987	74.8334	96.422	0.299168	-3.3426	-1.74097	3.67865e-05	0.000432735	0.236133	-4.23489	-2.08233	5.93719e-06	0.000104886	1.01013	1.01013	0.014541	0.959833	0.985912	0.776101	-1.28849	-0.365684	0.219324	0.440769	0.789301	-1.26694
1445452_at	Traf1	TNF receptor-associated factor 1	NM_009421	chr2:34943257-34961772 (-) // 89.92 // qB chr2:34957546-34958162 (-) // 75.53 // qB chr	NCBI 38	46.9298	37.476	50.0093	55.1359	38.6195	54.927	667.779	379.632	46.0214	36.4921	64.8224	56.5738	43.0018	55.2171	330.335	118.059	44.4718	48.9036	503.497	47.7487	51.2145	197.478	0.0883255	-11.3218	-3.50103	5.85086e-07	1.80369e-05	0.097128	-10.2957	-3.36397	9.14401e-07	2.58472e-05	0.241793	-4.13577	-2.04816	0.000144462	0.00149196	0.259343	-3.8559	-1.94707	0.000227399	0.00219472	1.09966	1.09966
1421445_at	Slc26a3	solute carrier family 26, member 3	NM_021353	chr12:31438218-31473912 (+) // 98.66 // qA2 chr12:31438218-31473912 (+) // 98.66 // qA2	NCBI 38	17.8237	19.7241	17.4337	21.4498	20.3634	18.3715	774.995	319.766	16.7852	18.5667	18.5965	17.8931	19.4613	14.5592	197.61	194.485	18.3005	20.0204	497.789	17.9624	17.179	196.041	0.0367635	-27.2009	-4.76558	1.9578e-10	4.57507e-08	0.0402186	-24.8641	-4.63599	2.7536e-10	5.86457e-08	0.0916257	-10.914	-3.4481	1.01679e-08	9.00949e-07	0.0876296	-11.4117	-3.51244	8.14439e-09	7.55803e-07	1.09398	1.09398
1426396_at	Cd247	CD247 antigen	NM_001113391 /// NM_001113392 /// NM_001113393 /// NM_001113394 /// NM_031162 /// NR_10	chr1:165788722-165867687 (+) // 94.58 // qH2.3 chr1:165788764-165870246 (+) // 99.34 //	NCBI 38	26.1335	20.8026	26.9385	25.6564	24.4156	25.4162	344.297	517.064	26.5279	23.2937	32.6068	24.5811	23.4003	34.4952	186.092	149.36	24.4661	25.1569	421.927	27.2112	27.0724	166.717	0.0579862	-17.2455	-4.10815	1.13743e-10	3.18629e-08	0.0596237	-16.7719	-4.06797	1.28508e-10	3.53404e-08	0.163218	-6.12676	-2.61513	2.77608e-08	1.89823e-06	0.162385	-6.1582	-2.62251	2.68487e-08	1.86293e-06	1.02824	1.02824
1443260_at	Meis1	Meis homeobox 1	NM_001193271 /// NM_010789	chr11:19009783-19010411 (-) // 95.28 // qA3.1 chr11:19009783-19010411 (-) // 95.28 // q	NCBI 38	157.289	201.36	195.55	122.037	200.847	213.035	151.716	189.462	128.415	222.085	159.866	190.039	217.267	112.85	73.0321	61.8531	183.644	173.488	169.542	165.817	167.024	67.2107	1.08318	1.08318	0.115273	0.717662	0.849356	1.02328	1.02328	0.033201	0.916864	0.960107	2.46713	2.46713	1.30283	0.00110937	0.0076018	2.48509	2.48509	1.3133	0.00104255	0.00744931	0.944698	-1.05854
1449456_a_at	Cma1	chymase 1, mast cell	NM_010780	chr14:55941452-55944661 (-) // 98.8 // qC3 chr14:55941452-55944661 (-) // 98.8 // qC3	NCBI 38	56.1912	40.1389	40.6098	58.0658	36.8987	50.1401	194.383	360.883	49.3895	46.6134	45.479	48.0952	54.1658	33.4614	124.36	88.9257	45.077	47.5377	264.857	47.1325	44.3395	105.161	0.170193	-5.87567	-2.55476	8.39582e-07	2.38242e-05	0.179484	-5.57152	-2.47807	1.17754e-06	3.11669e-05	0.448193	-2.23118	-1.15781	0.00157321	0.0100729	0.421635	-2.37172	-1.24593	0.000895058	0.00659932	1.05459	1.05459
1457588_at	Vcp	valosin containing protein	NM_009503	chr4:42979962-43000473 (-) // 98.1 // qA5 /// chrX:104345266-104348505 (-) // 96.63 //	NCBI 38	182.067	286.081	420.088	179.747	275.437	274.047	257.066	500.863	159.84	290.47	391.663	300.798	261.392	363.318	92.9451	219.063	279.697	238.507	358.823	262.966	305.682	142.695	0.77948	-1.28291	-0.359416	0.452964	0.652501	0.664689	-1.50446	-0.589249	0.226998	0.411886	1.84285	1.84285	0.881939	0.0802133	0.217253	2.1422	2.1422	1.09909	0.0343334	0.116435	0.852734	-1.1727
1455904_at	Gas5 /// Snord47	growth arrest specific 5 /// small nucleolar RNA, C/D box 47	NR_002840 /// NR_028543	chr1:161035749-161038539 (+) // 89.54 // qH2.1 chr1:161035749-161038537 (+) // 94.63 //	NCBI 38	774.575	1500.53	1685.01	886.695	1517.36	1635.48	1122.32	1298.95	476.858	1682.95	1194.82	1304.08	1476.83	1302.57	452.151	512.99	1251.12	1300.63	1207.41	986.1	1358.78	481.62	1.03623	1.03623	0.0513443	0.911557	0.958436	1.07725	1.07725	0.107353	0.816428	0.906114	2.04747	2.04747	1.03384	0.0401786	0.130058	2.8212	2.8212	1.49631	0.00579482	0.0291363	1.03959	1.03959
1437671_x_at	Prss23	protease, serine, 23	NM_029614	chr7:89509108-89517539 (-) // 96.29 // qD3 chr7:89509099-89509395 (-) // 92.72 // qD3 c	NCBI 38	12328.3	10181	10587	11183.4	10087.4	11756.5	2853.57	3044.61	13203.7	11764.5	9930.3	11441.8	10445.7	12477.6	1929.18	718.052	10993.8	10986.9	2947.55	11554	11424.9	1177	3.72993	3.72993	1.89915	2.3644e-05	0.000306951	3.72753	3.72753	1.89822	2.37598e-05	0.00030944	9.81687	9.81687	3.29526	5.58939e-08	3.28481e-06	9.70689	9.70689	3.27901	5.92265e-08	3.4202e-06	0.999357	-1.00064
1440854_at	2810403A07Rik	RIKEN cDNA 2810403A07 gene	NM_028814	chr3:88685808-88712933 (+) // 95.95 // qF1 chr3:88685813-88705939 (+) // 86.64 // qF1 c	NCBI 38	79.3436	94.0193	182.672	65.0096	77.0458	83.1744	147.895	299.31	67.7108	105.829	137.347	91.1429	88.694	135.244	66.2564	106.601	110.867	74.6764	210.395	99.4707	103.018	84.0415	0.526943	-1.89774	-0.924281	0.0402058	0.114724	0.354933	-2.81743	-1.49438	0.00277818	0.0134004	1.18359	1.18359	0.243169	0.558752	0.769239	1.22579	1.22579	0.293712	0.481399	0.708422	0.673571	-1.48462
1455257_at	Itgb3	integrin beta 3	NM_016780	chr11:104608053-104667790 (+) // 96.08 // qE1 chr11:104669326-104670902 (+) // 92.35 //	NCBI 38	232.574	226.256	523.325	221.805	227.678	467.53	1129.01	687.449	251.169	237.416	177.149	224.763	215.768	236.037	898.523	138.698	301.98	286.879	880.989	219.418	225.371	353.021	0.342773	-2.91738	-1.54467	0.0266113	0.0831853	0.325634	-3.07093	-1.61868	0.0212254	0.0686228	0.621543	-1.6089	-0.686074	0.28659	0.522348	0.638406	-1.5664	-0.647454	0.313409	0.552454	0.949999	-1.05263
1441684_at	Ttc3	tetratricopeptide repeat domain 3	NM_009441	chr16:94370617-94469222 (+) // 98.72 // qC4 chr16:94370617-94469222 (+) // 98.72 // qC4	NCBI 38	77.9427	65.9851	92.9407	49.3379	67.944	96.0483	179.12	285.788	76.1245	71.6239	91.7675	81.8588	78.5455	90.5053	79.6841	103.174	78.1883	68.5393	226.253	79.3886	83.487	90.6717	0.34558	-2.89369	-1.53291	7.48317e-05	0.000754288	0.302933	-3.30106	-1.72293	2.40037e-05	0.000311626	0.87556	-1.14213	-0.191722	0.487828	0.717424	0.920765	-1.08605	-0.119095	0.66464	0.837363	0.876593	-1.14078
1437917_at	D530037H12Rik	RIKEN cDNA D530037H12 gene	---	chr1:64114181-64114977 (-) // 92.9 // qC2 chr1:64114181-64114977 (-) // 92.9 // qC2	NCBI 38	66.2459	107.487	138.908	76.1752	78.6693	166.66	415.201	751.501	85.4061	101.502	174.303	110.349	87.1717	156.043	178.72	280.564	99.637	99.9594	558.592	114.749	114.497	223.925	0.178372	-5.60627	-2.48704	9.19494e-05	0.000886492	0.178949	-5.58819	-2.48238	9.35742e-05	0.000897552	0.512446	-1.95143	-0.964528	0.0496482	0.152512	0.511321	-1.95572	-0.967699	0.0490036	0.151929	1.00323	1.00323
1448870_at	Ltbp1	latent transforming growth factor beta binding protein 1	NM_019919 /// NM_206958	chr17:75392444-75393047 (+) // 22.22 // qE2 chr17:75392186-75392514 (+) // 14.02 // qE2	NCBI 38	2080.16	2360.99	1362.93	1563.02	2103.75	2146.82	308.119	269.141	1653.57	2555.67	1313.48	1520.97	2218.37	1426.02	199.79	67.7147	1884.67	1918.28	287.975	1770.57	1688.23	116.314	6.54436	6.54436	2.71025	1.69174e-05	0.000234911	6.66121	6.66121	2.73578	1.53775e-05	0.000221535	15.2226	15.2226	3.92814	3.05161e-07	1.22046e-05	14.5143	14.5143	3.8594	3.72984e-07	1.45393e-05	1.01786	1.01786
1440635_at	Palld	palladin, cytoskeletal associated protein	NM_001081390	chr8:61513245-61591139 (-) // 98.61 // qB3.1 chr8:61511428-61513269 (-) // 95.63 // qB3	NCBI 38	29.5748	22.4413	31.3316	27.4335	21.6729	29.0105	97.2982	224.464	30.5841	30.107	24.6132	33.9239	24.2742	32.0179	56.135	63.5309	27.4991	25.8376	147.783	28.2994	29.763	59.7104	0.186076	-5.37413	-2.42604	1.55204e-06	3.82715e-05	0.174834	-5.71972	-2.51594	1.03881e-06	2.83246e-05	0.473946	-2.10995	-1.07721	0.00272389	0.0156223	0.498459	-2.00618	-1.00445	0.00438146	0.0234327	0.93958	-1.06431
1443088_at	9930031P18Rik	RIKEN cDNA 9930031P18 gene	---	chr13:107863528-107864212 (-) // 93.72 // qD2.1 chr13:107863528-107864212 (-) // 93.72	NCBI 38	47.675	53.0414	220.086	54.0555	47.2158	91.4869	460.869	723.764	81.5264	58.6816	165.61	77.9522	63.925	127.868	251.974	217.197	82.2561	61.5646	577.545	92.5333	86.0504	233.941	0.142423	-7.02133	-2.81175	0.000461338	0.00318449	0.106597	-9.38112	-3.22976	0.000137192	0.00121514	0.395542	-2.52818	-1.3381	0.0453013	0.142208	0.367831	-2.71864	-1.44289	0.0328613	0.112474	0.748454	-1.33609
1456547_at	Gm19313	predicted gene, 19313	XR_140669 /// XR_142115	chr4:155210594-155211308 (-) // 99.02 // qE2 chr4:155210594-155211308 (-) // 99.02 // q	NCBI 38	122.549	97.7559	220.625	97.3607	74.8535	191.624	314.275	419.002	111.672	115.933	220.473	132.37	93.0998	204.329	148.695	145.985	138.26	111.775	362.878	141.851	136.046	147.332	0.381011	-2.6246	-1.3921	0.00923981	0.0356388	0.308025	-3.24648	-1.69888	0.00255143	0.0124875	0.962794	-1.03864	-0.0547009	0.906172	0.963496	0.923394	-1.08296	-0.114982	0.804503	0.913762	0.808443	-1.23695
1438429_at	2610319H10Rik	RIKEN cDNA 2610319H10 gene	---	chr8:11622380-11625912 (-) // 96.35 // qA1.1 chr8:11622380-11625912 (-) // 96.35 // qA1	NCBI 38	344.14	434.125	474.603	353.954	399.135	444.395	543.617	660.938	282.914	426.99	472.916	420.605	437.525	418.948	182.229	326.646	413.898	397.447	599.414	385.14	425.611	243.977	0.690504	-1.44822	-0.534278	0.0575069	0.151488	0.663058	-1.50816	-0.592793	0.037858	0.107874	1.5786	1.5786	0.658646	0.0234058	0.0853651	1.74448	1.74448	0.802797	0.00800703	0.0377154	0.960252	-1.04139
1426442_at	Gpm6a	glycoprotein m6a	NM_001253754 /// NM_001253756 /// NM_153581	chr8:54954706-55060878 (+) // 97.99 // qB1.3 chr8:54954706-55060878 (+) // 97.99 // qB1	NCBI 38	1438.83	1671.82	1471.72	1562.29	1601.45	1498.69	989.925	588.095	1254.15	1926.23	1510.36	1366.8	1789.89	1713.18	512.094	188.357	1524.06	1553.6	762.995	1539.45	1612.29	310.573	1.99749	1.99749	0.998188	0.0115396	0.0426563	2.03613	2.03613	1.02583	0.00987337	0.0374232	4.95697	4.95697	2.30946	1.31999e-05	0.000221147	5.19131	5.19131	2.3761	9.84568e-06	0.000180876	1.01935	1.01935
1430576_at	Tpp2	tripeptidyl peptidase II	NM_009418	chr1:43933999-44002971 (+) // 99.74 // qC1.1 chr1:43933999-44002971 (+) // 99.74 // qC1	NCBI 38	43.7932	64.138	104.548	41.5154	48.1247	94.4861	139.735	233.797	39.0572	48.5716	112.242	58.7697	58.1299	118.206	65.88	82.2521	66.4718	57.3714	180.747	59.7125	73.9173	73.6161	0.36776	-2.71916	-1.44316	0.0145961	0.0515586	0.317413	-3.15047	-1.65557	0.00659539	0.0269437	0.811128	-1.23285	-0.301998	0.565513	0.773593	1.00409	1.00409	0.00588859	0.990954	0.996317	0.863099	-1.15862
1459344_at	9630019E01Rik	RIKEN cDNA 9630019E01 gene	---	chr2:146401622-146402282 (-) // 99.55 // qG1 chr2:146401622-146402282 (-) // 99.55 // q	NCBI 38	21.3576	19.0099	24.2542	18.5515	17.6097	21.4491	31.993	129.507	18.2127	19.9281	23.5323	19.0932	19.0101	22.7421	22.9081	30.0826	21.4342	19.1358	64.3684	20.4409	20.2099	26.2514	0.332991	-3.00308	-1.58644	0.00165175	0.00878175	0.297285	-3.36377	-1.75008	0.000773928	0.00477104	0.778664	-1.28425	-0.360927	0.383688	0.625351	0.769861	-1.29894	-0.37733	0.363113	0.603766	0.892772	-1.12011
1440764_at	Araf	v-raf murine sarcoma 3611 viral oncogene homolog	NM_001159645 /// NM_009703	chrX:20848542-20860519 (+) // 97.76 // qA1.3 chrX:20848558-20852906 (+) // 87.86 // qA1	NCBI 38	244.63	265.213	538.753	226.047	310.11	479.75	267.641	534.33	145.651	342.004	424.345	300.376	365.571	369.113	98.0098	242.757	326.962	322.783	378.164	276.495	343.503	154.248	0.864602	-1.1566	-0.209892	0.696168	0.835728	0.853549	-1.17158	-0.228454	0.670986	0.816219	1.79253	1.79253	0.841997	0.133401	0.31428	2.22695	2.22695	1.15507	0.0469046	0.147196	0.987216	-1.01295
1444096_at	Zfr	zinc finger RNA binding protein	NM_011767	chr15:12117852-12185683 (+) // 95.38 // qA1 chr15:12172242-12172958 (+) // 56.9 // qA1	NCBI 38	164.175	175.043	215.047	148.135	139.529	168.444	314.453	328.422	172.422	169.614	178.672	191.18	157.23	196.738	173.248	99.2355	183.511	151.563	321.361	173.529	180.837	131.12	0.571042	-1.75118	-0.808331	0.00173883	0.00915787	0.471627	-2.12032	-1.08428	0.000154453	0.00133589	1.32344	1.32344	0.404293	0.0708873	0.19854	1.37918	1.37918	0.463811	0.0419244	0.135262	0.825906	-1.21079
1450757_at	Cdh11	cadherin 11	NM_009866	chr8:102632933-102785111 (-) // 99.86 // qD1 chr8:102632933-102785111 (-) // 99.86 // q	NCBI 38	7896.87	7824.12	9537.86	7429.64	7745.89	8950.9	189.235	264.235	7070.74	7206.26	4237.69	7541.86	7205.91	4649.93	123.901	67.2902	8383.29	8015.63	223.604	5998.97	6322.15	91.3061	37.4928	37.4928	5.22854	2.784e-10	5.89489e-08	35.8487	35.8487	5.16385	3.24693e-10	6.65635e-08	65.7033	65.7033	6.03789	4.65919e-11	1.5287e-08	69.2405	69.2405	6.11354	3.98858e-11	1.36532e-08	0.956149	-1.04586
1438972_x_at	2810410L24Rik	RIKEN cDNA 2810410L24 gene	NR_030682	chr11:120187957-120189890 (-) // 100.0 // qE2 chr11:120187959-120188253 (-) // 97.96 //	NCBI 38	244.104	390.24	423.417	329.013	512.916	551.235	873.779	1851.47	232.172	395.546	459.61	371.102	472.713	450.626	466.881	577.81	342.939	453.111	1271.93	348.175	429.177	519.392	0.269625	-3.70886	-1.89097	0.000189922	0.00156593	0.356243	-2.80707	-1.48907	0.00137046	0.00757791	0.670353	-1.49175	-0.577007	0.139576	0.324146	0.826305	-1.21021	-0.275254	0.466029	0.696127	1.32126	1.32126
1429236_at	Galnt15	UDP-N-acetyl-alpha-D-galactosamine:polypeptide N-acetylgalactosaminyltransferase 15	NM_030166	chr14:32028988-32062204 (+) // 86.5 // qB chr14:32028988-32062204 (+) // 86.5 // qB chr	NCBI 38	28.5554	27.01	30.0773	28.8638	25.4578	33.4016	743.761	299.691	26.4814	25.4099	30.7407	29.5291	35.9984	31.8463	235.757	157.672	28.5202	29.0612	472.12	27.4507	32.3492	192.801	0.0604083	-16.554	-4.04911	4.65925e-09	4.70105e-07	0.0615545	-16.2458	-4.02199	5.05331e-09	5.13804e-07	0.142378	-7.02356	-2.8122	3.39341e-07	1.31257e-05	0.167785	-5.95999	-2.57531	9.1309e-07	2.87981e-05	1.01897	1.01897
1448730_at	Cpa3	carboxypeptidase A3, mast cell	NM_007753	chr3:20215615-20242181 (-) // 95.28 // qA2 chr3:20215615-20242181 (-) // 95.28 // qA2	NCBI 38	41.6017	32.4124	32.468	47.6158	38.8683	34.9461	154.716	313.955	40.2082	27.8358	29.7798	44.6174	29.1828	27.8551	156.865	51.7408	35.2446	40.1403	220.395	32.182	33.1012	90.0903	0.159916	-6.25329	-2.64461	2.18356e-05	0.00028804	0.18213	-5.49059	-2.45696	4.51606e-05	0.000506083	0.357218	-2.79941	-1.48512	0.00305343	0.0171093	0.367422	-2.72166	-1.44449	0.00369003	0.0204301	1.13891	1.13891
1449396_at	Aoc3	amine oxidase, copper containing 3	NM_009675	chr11:101330604-101339428 (+) // 90.01 // qD chr11:101330604-101339428 (+) // 90.01 //	NCBI 38	297.967	419.869	69.6553	387.985	563.76	208.184	243.235	228.933	465.925	415.598	39.0216	558.272	652.898	63.4841	220.735	42.2669	205.784	357.096	235.975	196.23	284.961	96.5905	0.872058	-1.14671	-0.197504	0.874167	0.938388	1.51328	1.51328	0.597679	0.633152	0.7901	2.03156	2.03156	1.02259	0.418173	0.658221	2.95019	2.95019	1.56081	0.224284	0.44725	1.73529	1.73529
1456836_at	Itk	IL2 inducible T cell kinase	NM_010583	chr11:46325149-46389515 (-) // 94.96 // qB1.1 chr11:46363102-46389484 (-) // 77.29 // q	NCBI 38	35.8898	26.0774	23.3511	38.3448	23.7829	24.0612	80.5865	90.0367	34.6548	25.6729	20.4391	38.6985	27.6586	19.8271	48.842	24.9361	27.9586	27.996	85.1804	26.2965	27.6859	34.8984	0.328228	-3.04667	-1.60723	0.000527187	0.00354346	0.328667	-3.04259	-1.6053	0.00053246	0.00356139	0.753517	-1.32711	-0.408288	0.265347	0.497792	0.793332	-1.26051	-0.334003	0.358311	0.598534	1.00134	1.00134
1436871_at	Srsf7	serine/arginine-rich splicing factor 7	NM_001195485 /// NM_001195486 /// NM_001195487 /// NM_146083 /// NR_036615	chr17:80200073-80207302 (-) // 97.99 // qE3 chr17:80201309-80207300 (-) // 96.09 // qE3	NCBI 38	286.36	276.227	515.36	200.01	215.456	529.422	979.34	1816.93	188.477	255.85	444.478	290.86	199.823	443.422	427.442	698.907	344.166	283.621	1333.96	277.778	295.38	546.573	0.258	-3.87597	-1.95456	0.0020373	0.0104177	0.212614	-4.70336	-2.23369	0.000733039	0.00457226	0.508218	-1.96766	-0.976481	0.0766725	0.210379	0.540423	-1.8504	-0.887839	0.103921	0.264351	0.824085	-1.21347
1438052_at	A130071D04Rik	RIKEN cDNA A130071D04 gene	---	chr1:138164752-138165826 (-) // 66.39 // qE4 chr1:138164752-138165826 (-) // 66.39 // q	NCBI 38	36.4171	43.9516	74.2381	35.5746	38.6445	42.5269	335.45	318.35	43.2289	37.7595	81.8486	42.2561	30.8279	64.122	222.172	81.2855	49.166	38.8117	326.788	51.124	43.7133	134.385	0.150453	-6.64661	-2.73262	3.79514e-05	0.000442972	0.118768	-8.4198	-3.07378	1.16421e-05	0.000177519	0.380428	-2.62862	-1.3943	0.00811624	0.0373903	0.325284	-3.07424	-1.62023	0.00308431	0.0176934	0.789402	-1.26678
1425087_at	Hypk	huntingtin interacting protein K	NM_026318	chr2:121457126-121458310 (+) // 91.72 // qE5 chr2:121457126-121458310 (+) // 91.72 // q	NCBI 38	83.0375	130.508	223.428	88.5716	117.49	229.544	97.4374	162.297	70.5416	118.11	230.133	120.873	121.76	232.448	26.8804	99.5557	134.282	133.676	125.753	124.233	150.68	51.7311	1.06782	1.06782	0.0946685	0.884196	0.944196	1.063	1.063	0.0881416	0.892114	0.946756	2.40152	2.40152	1.26395	0.0690726	0.194824	2.91275	2.91275	1.54238	0.0310606	0.107709	0.995491	-1.00453
1438527_at	Gm12816 /// Gm5879 /// Rpl3	predicted gene 12816 /// predicted gene 5879 /// ribosomal protein L3	NM_013762 /// XM_001475733 /// XM_001476804 /// XR_035706 /// XR_107848	chr15:80079053-80080101 (-) // 57.53 // qE1 chr15:80079053-80080101 (-) // 57.53 // qE1	NCBI 38	475.171	501.649	798.44	368.312	471.056	743.748	548.735	743.61	317.153	564.565	729.874	486.974	473.11	776.615	227.561	303.647	575.212	505.326	638.782	507.47	563.48	262.863	0.900481	-1.11052	-0.151232	0.69993	0.837937	0.791075	-1.2641	-0.338114	0.394356	0.59446	1.93054	1.93054	0.949004	0.0281368	0.0987546	2.14361	2.14361	1.10004	0.0133416	0.0561095	0.878502	-1.1383
1441507_at	Sptbn1	spectrin beta, non-erythrocytic 1	NM_009260 /// NM_175836	chr11:30107508-30198164 (-) // 99.21 // qA3.3 chr11:30107508-30198164 (-) // 99.21 // q	NCBI 38	39.699	38.4283	84.4864	37.092	44.624	71.3337	104.099	222.785	44.773	53.6604	59.7685	43.9449	52.1829	64.8867	53.2973	73.7233	50.5133	49.0585	152.288	52.3657	52.9904	62.6838	0.331696	-3.01481	-1.59207	0.00144157	0.00788648	0.322143	-3.10421	-1.63423	0.00118133	0.00671275	0.835396	-1.19704	-0.259468	0.522178	0.742855	0.845361	-1.18293	-0.242361	0.549564	0.761588	0.9712	-1.02965
1429742_at	Rcbtb2	regulator of chromosome condensation (RCC1) and BTB (POZ) domain containing protein 2	NM_001170694 /// NM_134083 /// NR_033185	chr14:73138768-73184218 (+) // 89.24 // qD3 chr14:73138768-73184218 (+) // 89.24 // qD3	NCBI 38	36.3506	32.3069	52.3604	40.5332	28.9184	49.0206	86.3131	162.045	35.2885	31.3625	91.4869	39.2321	30.5428	75.0096	52.8927	44.7964	39.4701	38.584	118.255	46.6088	44.7942	48.6764	0.333772	-2.99606	-1.58307	0.00542796	0.0232	0.326277	-3.06488	-1.61583	0.00475962	0.0206706	0.957521	-1.04436	-0.062624	0.897025	0.95968	0.920245	-1.08667	-0.11991	0.804455	0.913736	0.977543	-1.02297
1459601_at	Sik1	salt inducible kinase 1	NM_010831	chr17:31844256-31855778 (-) // 94.62 // qB1 chr17:31852250-31852770 (-) // 69.62 // qB1	NCBI 38	95.1714	53.5192	81.3963	109.301	25.0087	94.6977	400.652	218.104	67.3292	56.1741	53.0793	90.8956	47.8782	89.9941	116.038	128.86	74.5693	63.7309	295.638	58.5538	73.1674	122.281	0.252232	-3.9646	-1.98718	0.0023784	0.0117966	0.215571	-4.63883	-2.21376	0.00106383	0.00617024	0.478846	-2.08835	-1.06237	0.065206	0.186484	0.598356	-1.67125	-0.740924	0.183409	0.391998	0.854655	-1.17006
1428781_at	Dmkn	dermokine	NM_001166173 /// NM_001166174 /// NM_028618 /// NM_172899	chr7:30776405-30781066 (+) // 93.54 // qB1 chr7:30776405-30781066 (+) // 93.54 // qB1	NCBI 38	97.3511	82.4559	46.6493	123.601	65.9492	34.3599	509.898	155.735	66.79	95.6108	31.136	81.8588	81.0451	28.8509	206.485	65.8464	72.0781	65.4277	281.797	58.3661	57.6301	116.603	0.255781	-3.90959	-1.96702	0.0181365	0.0612256	0.232181	-4.30698	-2.10668	0.0125764	0.0453913	0.500553	-1.99779	-0.998405	0.193076	0.404023	0.494243	-2.0233	-1.01671	0.185568	0.394593	0.907734	-1.10164
1436222_at	Gas5	growth arrest specific 5	NR_002840	chr1:161035749-161038539 (+) // 89.54 // qH2.1 chr1:161035749-161038537 (+) // 94.63 //	NCBI 38	1725.08	1984.86	2083.76	1711.64	1882.42	2092.88	1150.31	1264.83	1038.04	1902.51	1724.17	2013.55	1741.16	2028.42	413.985	605.843	1925.08	1889.25	1206.24	1504.43	1923.08	500.81	1.59602	1.59602	0.674479	0.0132869	0.0477798	1.56628	1.56628	0.647342	0.0165589	0.0564877	3.004	3.004	1.58688	1.44176e-05	0.000237404	3.83981	3.83981	1.94103	1.70591e-06	4.65727e-05	0.981364	-1.01899
1451901_at	Hltf	helicase-like transcription factor	NM_009210 /// NM_144959	chr3:20057819-20108521 (+) // 93.7 // qA2 chr3:20057838-20118490 (+) // 97.03 // qA2 ch	NCBI 38	34.4162	39.5111	69.6553	33.0491	39.4095	87.1823	82.1438	120.477	32.0099	37.7102	85.3649	44.2883	40.933	104.072	28.0419	60.899	45.5838	48.4243	99.4811	46.8819	57.3543	41.3189	0.458218	-2.18237	-1.12589	0.0667636	0.169266	0.486769	-2.05436	-1.03869	0.0877973	0.206011	1.13464	1.13464	0.182235	0.751295	0.888794	1.38809	1.38809	0.473101	0.41562	0.65256	1.06231	1.06231
1453840_at	Pabpc1	poly(A) binding protein, cytoplasmic 1	NM_008774	chr15:36595659-36608760 (-) // 90.87 // qB3.1 chr15:36603495-36608973 (-) // 72.4 // qB	NCBI 38	117.304	363.914	609.837	86.5497	391.393	682.96	338.246	1476.36	53.7702	352.177	668.233	157.586	344.327	701.476	175.669	490.595	296.383	284.947	706.678	233.036	336.38	293.57	0.419402	-2.38435	-1.25359	0.298816	0.500795	0.40322	-2.48003	-1.31036	0.278409	0.473789	0.793801	-1.25976	-0.333151	0.778104	0.903574	1.14583	1.14583	0.196393	0.867935	0.942795	0.961418	-1.04013
1425028_a_at	Tpm2	tropomyosin 2, beta	NM_001277875 /// NM_001277876 /// NM_009416	chr4:43514710-43523539 (-) // 98.98 // qA5 chr4:43514710-43523539 (-) // 98.98 // qA5 c	NCBI 38	16111	12815.2	11384.8	16138.5	12969	12134.3	1622.87	1002.83	17429.8	13453.9	7298.15	15634.7	12937.1	8822.95	1244.42	227.235	13296	13643.3	1275.72	11961.4	12129.2	531.767	10.4224	10.4224	3.38162	4.21126e-05	0.000480597	10.6949	10.6949	3.41885	3.78438e-05	0.000441717	22.4939	22.4939	4.49146	2.24182e-06	5.58609e-05	22.8098	22.8098	4.51158	2.13536e-06	5.53805e-05	1.02614	1.02614
1438916_x_at	6720401G13Rik	RIKEN cDNA 6720401G13 gene	NR_015505 /// NR_026976	chrX:50563119-50569376 (-) // 97.58 // qA5 chrX:50555749-50562875 (-) // 81.31 // qA5 c	NCBI 38	91.3295	109.812	235.958	107.071	124.172	287.254	234.569	380.341	65.7224	129.876	234.667	125.749	124.041	223.15	93.7772	166.599	133.264	156.316	298.708	126.059	151.556	125	0.446135	-2.24147	-1.16445	0.0645152	0.165158	0.52331	-1.91091	-0.934262	0.129021	0.274579	1.00848	1.00848	0.0121825	0.983394	0.994203	1.21246	1.21246	0.277937	0.637477	0.820647	1.17299	1.17299
1444073_at	Maf	avian musculoaponeurotic fibrosarcoma (v-maf) AS42 oncogene homolog	NM_001025577	chr8:115682938-115683670 (-) // 49.47 // qE1 chr8:115703182-115706121 (-) // 90.59 // q	NCBI 38	105.402	216.568	285.965	109.705	195.459	327.456	719.546	1414.81	112.277	238.378	375.61	230.429	284.91	273.841	294.814	610.35	186.889	191.489	1008.97	215.822	261.969	424.194	0.185228	-5.39876	-2.43263	0.0010204	0.00599387	0.189787	-5.26906	-2.39755	0.00114222	0.0065325	0.508785	-1.96547	-0.974872	0.114656	0.281958	0.617568	-1.61926	-0.69533	0.24914	0.478297	1.02461	1.02461
1435648_at	Lrrn4	leucine rich repeat neuronal 4	NM_177303	chr2:132867954-132869427 (-) // 83.42 // qF2 chr2:132867954-132869427 (-) // 83.42 // q	NCBI 38	1987.67	2832.73	2067.51	1948.42	2646.9	1303.8	268.145	355.099	1798.17	3511.56	1169.69	1787.8	3493.2	663.84	172.766	97.4982	2266.42	1887.42	308.58	1947.49	1606.49	129.786	7.34452	7.34452	2.87667	0.000327714	0.00242789	6.1166	6.1166	2.61273	0.00073053	0.00455959	15.0052	15.0052	3.90739	1.84983e-05	0.000289183	12.3777	12.3777	3.62967	3.85124e-05	0.000536261	0.832811	-1.20075
1441100_at	Mbtd1	mbt domain containing 1	NM_134012	chr11:93912408-93946985 (+) // 98.08 // qD chr11:93885827-93913014 (+) // 96.04 // qD c	NCBI 38	43.2535	50.8088	98.173	45.4527	46.5254	74.5842	113.546	182.77	51.9462	45.7971	80.5583	58.7427	52.9903	100.854	53.22	69.3668	59.9767	54.0297	144.058	57.6544	67.9645	60.7592	0.416337	-2.4019	-1.26418	0.00718523	0.0290899	0.375054	-2.66628	-1.41483	0.00347461	0.0160332	0.9489	-1.05385	-0.075672	0.851519	0.940049	1.11858	1.11858	0.161668	0.689961	0.852015	0.900842	-1.11007
1418199_at	Hemgn	hemogen	NM_053149	chr4:46393550-46404236 (-) // 89.7 // qB1 chr4:46393550-46404236 (-) // 89.7 // qB1	NCBI 38	13.8951	10.5435	12.977	12.9066	12.2829	16.984	99.9853	18.0811	14.9583	12.5452	15.4027	12.611	11.1987	17.0408	25.514	12.6373	12.3882	13.9118	42.5188	14.2447	13.4009	17.9563	0.291357	-3.43221	-1.77914	0.00456603	0.020091	0.327193	-3.0563	-1.61179	0.00846289	0.0330177	0.793296	-1.26056	-0.334069	0.531151	0.749216	0.746309	-1.33993	-0.422155	0.430853	0.666457	1.123	1.123
1439349_at	Sbno2	strawberry notch homolog 2 (Drosophila)	NM_183426	chr10:80071275-80071854 (-) // 85.02 // qC1 chr10:80071275-80071854 (-) // 85.02 // qC1	NCBI 38	462.047	477.058	533.643	479.222	472.61	627.547	909.752	1196.42	359.22	571.3	605.843	546.559	589.422	529.912	493.797	394.234	489.97	521.871	1043.27	499.109	554.741	441.219	0.469637	-2.12931	-1.09038	0.000283085	0.00215619	0.500213	-1.99915	-0.999386	0.000591223	0.00386726	1.1312	1.1312	0.177854	0.435666	0.673026	1.25729	1.25729	0.330317	0.159234	0.356461	1.06511	1.06511
1443823_s_at	Atp1a2	ATPase, Na+/K+ transporting, alpha 2 polypeptide	NM_178405	chr1:172274115-172284819 (-) // 98.74 // qH3 chr1:172271709-172274004 (-) // 70.83 // q	NCBI 38	23.1191	22.4272	20.3995	22.2054	17.4395	18.7416	143.085	77.7042	18.6019	18.9854	16.6055	20.666	16.5941	21.0246	113.948	17.4783	21.9511	19.3612	105.443	18.0334	19.3188	44.6275	0.208179	-4.80357	-2.2641	0.000956571	0.0056841	0.183618	-5.4461	-2.44522	0.000513646	0.00345503	0.404086	-2.47472	-1.30727	0.0289357	0.100852	0.432888	-2.31006	-1.20793	0.0409533	0.132928	0.88202	-1.13376
1422812_at	Cxcr6	chemokine (C-X-C motif) receptor 6	NM_030712	chr9:123806474-123811855 (+) // 99.3 // qF4 chr9:123806474-123811855 (+) // 99.3 // qF4	NCBI 38	56.1564	41.971	61.6024	39.7938	35.7231	48.7093	2726.24	3679.02	62.3138	37.8929	61.2878	37.3037	29.1828	68.2272	1782.92	1013.97	52.5599	41.0639	3167	52.5023	42.0353	1344.54	0.0165961	-60.2551	-5.91301	4.69383e-10	8.43412e-08	0.0129662	-77.1238	-6.2691	2.28036e-10	5.19426e-08	0.0390485	-25.6092	-4.67859	8.12726e-09	7.54213e-07	0.0312637	-31.986	-4.99937	3.65078e-09	4.20036e-07	0.781278	-1.27995
1441229_at	D230019N24Rik	RIKEN cDNA D230019N24 gene	---	chr10:63295157-63295793 (+) // 50.62 // qB4 chr10:63295157-63295793 (+) // 50.62 // qB4	NCBI 38	44.7254	49.4379	85.3184	39.6165	40.8725	60.9725	150.22	162.258	53.8694	51.1258	72.4488	49.2472	52.606	100.947	52.1698	84.5475	57.3523	46.2182	156.123	58.4346	63.9494	66.4142	0.367355	-2.72216	-1.44475	0.00132965	0.00740445	0.296038	-3.37795	-1.75615	0.000269794	0.00207044	0.879855	-1.13655	-0.184662	0.610856	0.805164	0.96289	-1.03854	-0.0545571	0.879935	0.948418	0.805863	-1.24091
1443114_at	A730059M13Rik	RIKEN cDNA A730059M13 gene	---	chr4:126916981-126917659 (-) // 42.94 // qD2.2 chr4:126916981-126917659 (-) // 42.94 //	NCBI 38	32.7932	38.466	50.0253	45.136	38.3018	78.6818	61.826	81.4471	48.2345	38.4942	67.1428	45.5326	36.4921	69.1296	23.0809	39.5789	39.8122	51.4286	70.9618	49.9554	48.6103	30.2244	0.561039	-1.78241	-0.833827	0.0404863	0.115371	0.72474	-1.37981	-0.464465	0.226982	0.411886	1.65282	1.65282	0.72493	0.06947	0.195627	1.60831	1.60831	0.685546	0.0840083	0.226661	1.29178	1.29178
1436679_at	Tecpr1	tectonin beta-propeller repeat containing 1	NM_027410	chr5:144194752-144209916 (-) // 90.71 // qG2 chr5:144194441-144194997 (-) // 92.91 // q	NCBI 38	22.5604	27.8825	20.8268	23.5105	31.5	19.6032	44.0942	75.0844	23.3965	22.1251	25.045	25.1888	24.9054	27.9172	24.4273	24.6681	23.5741	24.3949	57.5395	23.492	25.9692	24.5474	0.409702	-2.4408	-1.28735	8.21123e-05	0.000812672	0.423969	-2.35866	-1.23797	0.000118177	0.00107827	0.957003	-1.04493	-0.0634046	0.785047	0.907	1.05792	1.05792	0.0812305	0.727027	0.872715	1.03482	1.03482
1434873_a_at	Acap1	ArfGAP with coiled-coil, ankyrin repeat and PH domains 1	NM_153788	chr11:69881564-69881861 (-) // 91.93 // qB3 chr11:69881564-69881861 (-) // 91.93 // qB3	NCBI 38	111.451	55.5	76.8947	98.923	67.1281	80.84	3358.13	3965.92	103.558	63.4374	82.0997	105.985	58.8516	83.2118	2725.34	894.405	78.0599	81.2728	3649.29	81.3985	80.3641	1561.27	0.0213899	-46.7511	-5.54693	7.78023e-09	6.84292e-07	0.0222702	-44.903	-5.48874	8.83144e-09	7.87168e-07	0.0521367	-19.1803	-4.26156	1.73982e-07	7.96625e-06	0.0514742	-19.4272	-4.28001	1.65525e-07	7.86654e-06	1.04116	1.04116
1422340_a_at	Actg2	actin, gamma 2, smooth muscle, enteric	NM_009610	chr6:83512909-83536225 (-) // 100.0 // qC3 chr6:83512909-83536225 (-) // 100.0 // qC3	NCBI 38	6548.08	5520.85	3829.32	6200.12	5974.33	4865.65	437.843	123.46	8802.91	7219.65	4434.74	7219.38	6961.98	4155.55	219.812	45.1449	5173.05	5648.69	232.504	6556.45	5933.22	99.6184	22.2497	22.2497	4.47571	5.93558e-06	0.000103921	24.295	24.295	4.60259	4.41363e-06	8.51408e-05	65.8178	65.8178	6.04041	2.16857e-07	9.52334e-06	59.5599	59.5599	5.89627	2.85838e-07	1.19639e-05	1.09192	1.09192
1425084_at	Gimap7	GTPase, IMAP family member 7	NM_146167	chr6:48718620-48724636 (+) // 89.61 // qB2.3 chr6:48718620-48724636 (+) // 89.61 // qB2	NCBI 38	32.9914	21.0926	23.1786	25.4523	26.2665	19.151	3058.46	3023.95	22.8622	21.1241	20.5314	21.5846	23.5279	20.041	2135.39	796.972	25.2661	23.3941	3041.15	21.4834	21.6711	1304.52	0.00830811	-120.364	-6.91126	1.54372e-11	7.06663e-09	0.00769254	-129.996	-7.02232	1.26397e-11	6.1297e-09	0.0164681	-60.7235	-5.92418	1.05725e-10	2.83828e-08	0.016612	-60.1975	-5.91163	1.08548e-10	2.89682e-08	0.925907	-1.08002
1453251_at	Dhx30	DEAH (Asp-Glu-Ala-His) box polypeptide 30	NM_001252682 /// NM_001252683 /// NM_133347	chr9:110084318-110117087 (-) // 92.98 // qF2 chr9:110084058-110084719 (-) // 93.6 // qF	NCBI 38	60.4411	57.8466	88.131	53.3994	65.1184	95.0668	73.1868	126.624	50.8962	67.6582	101.572	66.0154	68.3607	100.936	35.0676	48.7941	67.5428	69.1444	96.2664	70.4574	76.9426	41.3653	0.701626	-1.42526	-0.511226	0.167036	0.336136	0.718261	-1.39225	-0.47742	0.194807	0.370139	1.70329	1.70329	0.768324	0.0466124	0.145285	1.86007	1.86007	0.895357	0.0236769	0.0876727	1.02371	1.02371
1419334_at	Ctla4	cytotoxic T-lymphocyte-associated protein 4	NM_009843	chr1:60909024-60915832 (+) // 95.06 // qC2 chr1:60909024-60915832 (+) // 95.06 // qC2	NCBI 38	41.5207	27.9043	29.2784	36.248	36.1385	30.5341	256.477	392.41	38.1914	32.3439	27.9137	38.5115	37.7615	20.9509	224.938	82.7528	32.3717	34.1992	317.249	32.5483	31.2332	136.436	0.102039	-9.80015	-3.29281	9.47182e-07	2.6064e-05	0.107799	-9.2765	-3.21358	1.24053e-06	3.2472e-05	0.238561	-4.19179	-2.06757	0.000112138	0.00121722	0.228923	-4.36828	-2.12707	8.61082e-05	0.00101717	1.05645	1.05645
1430584_s_at	Car3	carbonic anhydrase 3	NM_007606	chr3:14863511-14865806 (+) // 87.24 // qA1 chr3:14863511-14865806 (+) // 87.24 // qA1 c	NCBI 38	26.6563	22.538	20.1598	24.7638	24.1173	22.8093	36.9695	225.301	25.9589	18.891	18.7111	25.7513	22.0187	21.6495	26.8809	57.3718	22.9651	23.8828	91.265	20.9354	23.0681	39.2709	0.251631	-3.97408	-1.99062	0.00260195	0.0126701	0.261688	-3.82135	-1.93408	0.00317997	0.0149318	0.533101	-1.87582	-0.907519	0.113685	0.280059	0.587411	-1.70239	-0.767558	0.174997	0.380163	1.03997	1.03997
1422540_at	Fbln1	fibulin 1	NM_010180	chr15:85206010-85285915 (+) // 98.8 // qE2 chr15:85206010-85285915 (+) // 98.8 // qE2 c	NCBI 38	253.904	250.04	97.0651	325.35	240.4	156.344	569.899	234.411	220.372	304.235	87.1754	306.356	340.409	95.2734	300.906	82.4661	183.321	230.369	365.473	180.126	214.97	157.521	0.501601	-1.99362	-0.995388	0.199776	0.381654	0.63033	-1.58647	-0.665821	0.382538	0.583084	1.1435	1.1435	0.193456	0.796947	0.913328	1.36471	1.36471	0.448594	0.553	0.764494	1.25664	1.25664
1432548_at	Parp14	poly (ADP-ribose) polymerase family, member 14	NM_001039530	chr16:35865924-35871382 (-) // 76.59 // qB3 chr16:35865924-35871382 (-) // 76.59 // qB3	NCBI 38	36.8048	44.7017	53.7844	40.8376	32.1513	42.5532	94.3313	264.301	34.5762	33.6089	43.6823	40.0814	32.3781	41.9504	52.7012	88.3724	44.5616	38.2294	157.898	37.0263	37.9004	68.2445	0.282218	-3.54336	-1.82512	0.000191578	0.00157613	0.242114	-4.13029	-2.04624	6.66909e-05	0.00068531	0.542555	-1.84313	-0.882159	0.0271686	0.0961573	0.55536	-1.80063	-0.848505	0.0324589	0.111369	0.857897	-1.16564
1442340_x_at	Cyr61	cysteine rich protein 61	NM_010516	chr3:145646973-145649985 (-) // 96.64 // qH2 chr3:145646975-145647680 (-) // 90.77 // q	NCBI 38	2187.27	3799.43	2788.07	2518.18	3019.11	1927.3	887.111	718.991	1591.92	4206.02	3015.83	3919.19	3219.36	2715.63	371.167	321.297	2850.9	2447	798.65	2723.04	3247.92	345.337	3.56965	3.56965	1.83578	0.00016565	0.00140538	3.06397	3.06397	1.6154	0.000502139	0.00339077	7.88531	7.88531	2.97917	1.23458e-06	3.52199e-05	9.40521	9.40521	3.23346	4.94841e-07	1.78829e-05	0.858338	-1.16504
1425684_at	Akr1b10	aldo-keto reductase family 1, member B10 (aldose reductase)	NM_172398	chr6:34384248-34390567 (+) // 89.09 // qB1 chr6:34384248-34390567 (+) // 89.09 // qB1 c	NCBI 38	126.54	164.132	318.859	129.603	150.386	290.278	183.836	540.478	87.7684	147.982	439.027	158.81	160.816	329.293	71.4725	259.976	187.787	178.185	315.208	178.651	203.357	136.308	0.595754	-1.67854	-0.747211	0.328039	0.532728	0.565292	-1.769	-0.822932	0.283303	0.479374	1.31063	1.31063	0.39026	0.604461	0.800851	1.49189	1.49189	0.577141	0.446522	0.679738	0.948867	-1.05389
1439696_at	Nr2c2	nuclear receptor subfamily 2, group C, member 2	NM_011630	chr6:92091415-92169211 (+) // 91.84 // qD1 chr6:92105415-92106089 (+) // 91.85 // qD1 c	NCBI 38	18.8554	21.0833	37.8478	20.8899	18.3639	25.3456	38.9391	107.709	33.0559	19.1425	31.3459	18.8522	26.6036	22.4388	27.4687	28.5909	24.6879	21.3436	64.7617	27.0692	22.4095	28.0242	0.38121	-2.62322	-1.39134	0.00383743	0.0174169	0.329571	-3.03425	-1.60134	0.0014081	0.00774847	0.965925	-1.03528	-0.0500169	0.901301	0.961528	0.799652	-1.25054	-0.322556	0.429515	0.665286	0.864537	-1.15669
1456762_at	Gimap6	GTPase, IMAP family member 6	NM_153175	chr6:48701397-48708214 (-) // 95.36 // qB2.3 chr6:48703114-48704127 (-) // 85.32 // qB2	NCBI 38	29.8718	21.7174	58.3988	25.6037	23.822	34.0382	1030.58	1941.67	22.9988	21.1789	52.2389	23.24	22.7828	40.5719	664.44	564.689	33.586	27.4842	1414.52	29.4126	27.7986	612.536	0.0237434	-42.117	-5.39633	3.16424e-08	2.01568e-06	0.0194298	-51.4674	-5.68559	1.70242e-08	1.27331e-06	0.0480177	-20.8256	-4.38029	3.56055e-07	1.36613e-05	0.0453827	-22.0348	-4.46171	2.88724e-07	1.20349e-05	0.818324	-1.22201
1451500_at	Ushbp1	Usher syndrome 1C binding protein 1	NM_181418	chr8:71385332-71395817 (-) // 87.83 // qB3.3 chr8:71385332-71395817 (-) // 87.83 // qB3	NCBI 38	62.7841	69.8624	127.413	75.477	105.798	151.917	6209.3	9658.17	75.1936	73.8617	133.361	63.5289	91.4506	144.746	4344.58	2595.05	82.3707	106.651	7744.2	90.4783	94.3892	3357.8	0.0106365	-94.0161	-6.55483	1.49995e-09	2.03762e-07	0.0137718	-72.6122	-6.18214	3.05909e-09	3.5196e-07	0.0269465	-37.1105	-5.21376	2.36635e-08	1.68601e-06	0.0281113	-35.5729	-5.15271	2.72106e-08	1.88426e-06	1.29477	1.29477
1443894_at	Evi2a	ecotropic viral integration site 2a	NM_001033711 /// NM_010161	chr11:79523090-79523725 (-) // 99.06 // qB5 chr11:79523090-79523725 (-) // 99.06 // qB5	NCBI 38	250.498	276.735	572.86	286.016	183.233	449.403	1041.86	1184.9	267.835	123.317	832.11	572.284	121.431	739.86	441.823	529.673	341.171	286.631	1111.12	301.779	371.843	483.751	0.307053	-3.25677	-1.70344	0.0513191	0.138895	0.257968	-3.87645	-1.95474	0.028561	0.0866786	0.623831	-1.603	-0.680773	0.406227	0.647736	0.768666	-1.30096	-0.379571	0.640134	0.822442	0.840143	-1.19027
1457913_at	Zfp266	zinc finger protein 266	NM_001082485 /// NM_001135019	chr9:20496486-20498812 (-) // 52.6 // qA3 chr9:20495067-20496633 (-) // 82.27 // qA3 ch	NCBI 38	45.6058	93.4204	143.645	52.2079	54.4884	75.2944	69.1353	120.336	60.3018	83.8991	129.172	105.22	80.0669	116.47	35.8898	44.0995	84.9016	59.8322	91.2113	86.78	99.3701	39.7835	0.930827	-1.07431	-0.103415	0.813097	0.905076	0.655973	-1.52445	-0.608292	0.179526	0.349549	2.18131	2.18131	1.12519	0.0211136	0.0788868	2.49777	2.49777	1.32064	0.00884712	0.0406825	0.704721	-1.419
1418450_at	Islr	immunoglobulin superfamily containing leucine-rich repeat	NM_001195431 /// NM_012043	chr9:58156266-58159183 (-) // 96.76 // qB chr9:58156266-58159183 (-) // 96.76 // qB	NCBI 38	983.414	1308.44	647.61	1243.8	1692.96	815.995	1100.83	204.276	1009.3	1696.17	283.484	1242.79	2130.72	455.864	533.685	80.172	941.032	1197.74	474.209	785.839	1064.75	206.848	1.98441	1.98441	0.98871	0.318288	0.522071	2.52578	2.52578	1.33673	0.184105	0.35601	3.79911	3.79911	1.92566	0.0644817	0.184929	5.1474	5.1474	2.36384	0.0276727	0.0986553	1.27281	1.27281
1452250_a_at	Col6a2	collagen, type VI, alpha 2	NM_146007	chr10:76595761-76623325 (-) // 96.75 // qC1 chr10:76595761-76623325 (-) // 96.75 // qC1	NCBI 38	2355.77	3492.21	1563.77	2774.96	4553.43	1782.69	1449.33	343.226	1939.37	4001.07	842.018	2564.57	4737.05	695.547	666.302	142.059	2343.1	2824.15	705.298	1869.45	2036.82	307.657	3.32217	3.32217	1.73213	0.080956	0.19628	4.00416	4.00416	2.0015	0.047717	0.129068	6.07641	6.07641	2.60322	0.0138833	0.0568349	6.62034	6.62034	2.72691	0.0107215	0.0472862	1.20529	1.20529
1453152_at	Mamdc2	MAM domain containing 2	NM_174857	chr19:23302608-23448442 (-) // 99.94 // qB chr19:23302608-23448442 (-) // 99.94 // qB	NCBI 38	78.0623	122.061	181.56	93.3899	114.902	599.616	275.538	213.098	58.3069	94.4539	392.82	99.2138	92.2476	211.702	180.893	61.8754	120.046	185.995	242.315	129.333	124.666	105.796	0.495411	-2.01853	-1.0133	0.260844	0.457927	0.767574	-1.30281	-0.381622	0.665153	0.812256	1.22248	1.22248	0.289811	0.742	0.883791	1.17837	1.17837	0.236793	0.787797	0.904473	1.54937	1.54937
1431355_s_at	Trpm7	transient receptor potential cation channel, subfamily M, member 7	NM_001164325 /// NM_021450	chr2:126791564-126876261 (-) // 98.66 // qF1 chr2:126791564-126876261 (-) // 98.66 // q	NCBI 38	84.1227	133.698	248.922	86.4793	108.016	226.331	344.585	552.534	99.307	145.398	216.666	104.044	139.25	203.024	146.186	248.434	140.939	128.346	436.343	146.257	143.283	190.576	0.323003	-3.09595	-1.63038	0.00733442	0.0295559	0.29414	-3.39974	-1.76543	0.00443126	0.0195037	0.767446	-1.30302	-0.381863	0.469811	0.701931	0.751839	-1.33007	-0.411504	0.436806	0.671383	0.910642	-1.09813
1418735_at	Krt4	keratin 4	NM_008475	chr15:101918535-101924736 (-) // 97.04 // qF2 chr15:101918535-101924736 (-) // 97.04 //	NCBI 38	109.317	74.8548	102.893	93.4224	84.7643	80.4333	599.292	75.5459	92.4531	89.1417	65.0602	102.04	75.4461	67.356	115.692	74.882	94.4272	86.0397	212.777	81.2407	80.3391	93.0762	0.443786	-2.25334	-1.17206	0.0681364	0.171936	0.404367	-2.473	-1.30626	0.0450965	0.123588	0.872836	-1.14569	-0.196217	0.744229	0.885283	0.863152	-1.15854	-0.212313	0.724169	0.871084	0.911175	-1.09748
1438921_at	Atr	ataxia telangiectasia and Rad3 related	NM_019864	chr9:95940868-95951642 (+) // 98.23 // qE3.3 chr9:95905966-95906353 (+) // 90.98 // qE3	NCBI 38	16.8677	19.6254	26.1932	17.4376	17.8467	20.9295	43.531	59.1811	20.2073	18.4685	26.6306	19.2389	16.1971	24.2159	23.8137	20.7122	20.5442	18.6753	50.7565	21.5001	19.6142	22.209	0.40476	-2.4706	-1.30486	8.50658e-05	0.000834941	0.36794	-2.71783	-1.44246	3.24012e-05	0.000393147	0.968084	-1.03297	-0.0467959	0.843044	0.936021	0.883173	-1.13228	-0.179232	0.453026	0.685566	0.909033	-1.10007
1417917_at	Cnn1	calponin 1	NM_009922	chr9:22099265-22108727 (+) // 95.9 // qA3 chr9:22099265-22108727 (+) // 95.9 // qA3	NCBI 38	6966.92	5434.17	3661.48	7150.75	6264.48	4247.07	260.861	134.217	9126.35	5670.72	2580.02	8033.39	5956.25	2691.09	168.565	39.7768	5175.2	5751.41	187.111	5111.04	5049.41	81.884	27.6587	27.6587	4.78966	5.90454e-06	0.000103538	30.7376	30.7376	4.94193	4.23694e-06	8.22955e-05	62.4183	62.4183	5.9639	5.38546e-07	1.86408e-05	61.6674	61.6674	5.94644	5.56603e-07	1.9612e-05	1.11132	1.11132
1439090_at	Tbc1d23	TBC1 domain family, member 23	NM_026254	chr16:57168861-57231466 (-) // 96.79 // qC1.1 chr16:57179721-57180783 (-) // 71.87 // q	NCBI 38	61.2648	93.3957	157.303	67.7233	70.9387	142.985	148.023	293.17	64.0806	81.4313	206.88	93.5429	91.8148	210.79	70.6482	117.747	96.551	88.2344	208.317	102.584	121.878	91.2062	0.463482	-2.15758	-1.10941	0.0757785	0.186616	0.423557	-2.36096	-1.23937	0.0504746	0.134885	1.12475	1.12475	0.169604	0.772507	0.90072	1.33629	1.33629	0.418233	0.479593	0.707236	0.913859	-1.09426
1417680_at	Kcna5	potassium voltage-gated channel, shaker-related subfamily, member 5	NM_145983	chr6:126532549-126535437 (-) // 96.91 // qF3 chr6:126532549-126535437 (-) // 96.91 // q	NCBI 38	18.4145	20.5221	28.6259	20.2879	22.2804	21.9872	113.86	61.0827	19.5797	23.7236	16.8586	17.7865	19.1384	19.0734	80.5417	16.5847	22.1163	21.5002	83.3956	19.858	18.6555	36.548	0.265197	-3.77078	-1.91486	0.00149153	0.00810378	0.257809	-3.87884	-1.95563	0.00127155	0.00713504	0.543341	-1.84046	-0.88007	0.0878795	0.23242	0.510439	-1.9591	-0.97019	0.0628783	0.183362	0.972141	-1.02866
1429693_at	Dab2	disabled 2, mitogen-responsive phosphoprotein	NM_001008702 /// NM_001037905 /// NM_001102400 /// NM_023118	chr15:6386600-6439598 (+) // 98.91 // qA1 chr15:6416803-6440717 (+) // 97.05 // qA1 chr	NCBI 38	508.391	496.592	1262.85	550.673	394.002	875.603	792.942	1791.17	422.545	401.538	1640.55	870.439	420.799	1107.67	352.398	775.422	683.132	574.873	1191.78	652.932	740.307	522.744	0.573205	-1.74458	-0.802877	0.256072	0.452127	0.482368	-2.07311	-1.05179	0.143673	0.297334	1.24905	1.24905	0.320831	0.64275	0.82552	1.4162	1.4162	0.502025	0.470676	0.699784	0.841528	-1.18831
1445106_at	Gm19816	predicted gene, 19816	XR_140591 /// XR_142029	chr3:60580572-60581360 (+) // 96.45 // qD chr3:60580572-60581360 (+) // 96.45 // qD	NCBI 38	19.9379	20.1076	30.1447	22.9101	21.4661	30.3509	99.1105	69.32	25.0065	21.4927	35.144	25.0137	21.1344	30.9087	39.398	33.704	22.9484	24.6217	82.8873	26.6317	25.3756	36.44	0.276861	-3.61192	-1.85277	1.01837e-05	0.000158432	0.297049	-3.36644	-1.75123	1.81297e-05	0.000250741	0.730837	-1.36829	-0.452378	0.11222	0.277479	0.696367	-1.43602	-0.52208	0.0710561	0.200369	1.07292	1.07292
1455195_at	Rps24	ribosomal protein S24	NM_011297 /// NM_207634 /// NM_207635	chr14:24493852-24495859 (+) // 98.72 // qA3 chr14:24493852-24495859 (+) // 98.72 // qA3	NCBI 38	675.975	1235.82	1140.12	849.214	1330.12	1243.11	345.171	359.86	487.821	1241.97	1074.78	881.625	1340.76	1178.07	123.718	194.681	983.881	1119.78	352.439	866.749	1116.68	155.197	2.79164	2.79164	1.48111	0.00207183	0.01055	3.1773	3.1773	1.6678	0.000840581	0.00509215	5.58485	5.58485	2.48152	2.32238e-05	0.000346712	7.19523	7.19523	2.84704	5.64407e-06	0.000117468	1.13815	1.13815
1438535_at	Phip	pleckstrin homology domain interacting protein	NM_001081216 /// NM_031879	chr9:82893961-82975516 (-) // 93.76 // qE2 chr9:82868740-82896372 (-) // 97.99 // qE2 c	NCBI 38	92.9401	96.8246	158.497	85.3567	92.7584	166.981	259.936	290.579	79.912	96.2498	132.827	106.703	92.2806	124.36	116.333	126.542	112.565	109.754	274.831	100.716	106.985	121.331	0.409579	-2.44153	-1.28779	0.00106854	0.00621193	0.39935	-2.50407	-1.32427	0.000857988	0.00517743	0.830099	-1.20468	-0.268645	0.397225	0.638985	0.881765	-1.13409	-0.181534	0.564252	0.772707	0.975026	-1.02561
1417464_at	Tnnc2	troponin C2, fast	NM_009394	chr2:164777160-164779739 (-) // 97.62 // qH3 chr2:164777160-164779739 (-) // 97.62 // q	NCBI 38	66.6201	62.4638	51.0411	79.535	56.546	40.9921	453.099	59.5167	54.4874	49.407	53.3625	51.252	65.2137	38.7523	77.5441	67.8031	59.6649	56.9139	164.216	52.373	50.5959	72.5101	0.363331	-2.75231	-1.46064	0.0269152	0.0839664	0.34658	-2.88533	-1.52874	0.0216125	0.0696245	0.722284	-1.3845	-0.469362	0.436893	0.673997	0.697777	-1.43312	-0.519162	0.391083	0.630928	0.953898	-1.04833
1429882_at	2610005L07Rik	cadherin 11 pseudogene	NM_001024708 /// NM_001033456 /// NR_028428	chr8:20122306-20151967 (+) // 78.36 // qA1.3 /// chr8:20550246-20583096 (+) // 84.03 //	NCBI 38	343.788	420.838	566.667	240.611	281.168	233.604	649.635	994.854	401.047	385.153	395.751	454.963	369.903	332.035	360.43	349.69	434.418	250.949	803.938	393.934	382.316	355.016	0.540361	-1.85061	-0.888005	0.00140846	0.00774291	0.312148	-3.20361	-1.6797	3.84657e-06	7.58566e-05	1.10962	1.10962	0.150066	0.505977	0.731337	1.07689	1.07689	0.106871	0.634273	0.818753	0.577666	-1.7311
1457970_at	Actr1a	ARP1 actin-related protein 1A, centractin alpha	NM_016860	chr19:46376810-46395786 (-) // 95.91 // qC3 chr19:46391249-46391693 (-) // 43.82 // qC3	NCBI 38	20.8072	25.373	54.5538	23.5233	32.2012	28.7635	42.5183	106.547	20.3469	34.4591	66.3271	24.831	31.5238	37.7178	25.5848	34.5895	30.6529	27.9299	67.3068	35.961	30.9072	29.7484	0.455419	-2.19578	-1.13473	0.0429572	0.120786	0.414965	-2.40984	-1.26894	0.0262031	0.0811166	1.20884	1.20884	0.273623	0.597405	0.796401	1.03895	1.03895	0.0551262	0.914797	0.963393	0.911172	-1.09749
1422760_at	Padi4	peptidyl arginine deiminase, type IV	NM_011061	chr4:140745679-140774188 (-) // 95.97 // qD3 chr4:140745679-140774188 (-) // 95.97 // q	NCBI 38	105.218	164.658	141.968	123.172	155.919	116.843	171.874	259.725	58.2401	133.11	50.8085	73.3033	163.474	43.5501	157.984	55.2862	134.992	130.931	211.281	73.3055	80.513	93.4576	0.638921	-1.56514	-0.646291	0.265655	0.463564	0.619698	-1.61369	-0.690363	0.235977	0.422736	0.78437	-1.27491	-0.350394	0.539115	0.754317	0.861492	-1.16078	-0.215091	0.704832	0.860757	0.969914	-1.03102
1437638_at	Srrm2	serine/arginine repetitive matrix 2	NM_175229	chr17:23819496-23824741 (+) // 89.35 // qA3.3 chr17:23813888-23814587 (+) // 60.83 // q	NCBI 38	88.4759	130.735	125.922	72.8442	118.631	97.1694	379.588	389.479	90.3572	71.8128	116.706	90.9872	98.048	95.7472	251.706	115.284	113.355	94.3428	384.5	91.1493	94.8818	170.347	0.29481	-3.39202	-1.76214	7.50305e-05	0.000756003	0.245363	-4.07559	-2.02701	1.90728e-05	0.000260431	0.535082	-1.86887	-0.902168	0.0119933	0.0506472	0.556993	-1.79536	-0.844269	0.0171518	0.0684145	0.832276	-1.20152
1437426_at	Wac	WW domain containing adaptor with coiled-coil	NM_001146298 /// NM_153085 /// NR_027465	chr18:7901247-7901993 (+) // 99.47 // qA1 chr18:7901247-7901993 (+) // 99.47 // qA1 chr	NCBI 38	34.4685	41.695	56.8522	34.2905	34.9129	41.7258	138.308	159.475	46.9636	47.4142	63.2346	45.4572	44.6594	56.7044	71.4691	60.5766	43.393	36.8287	148.515	52.0245	48.6457	65.7979	0.292178	-3.42257	-1.77508	1.49379e-06	3.72923e-05	0.247981	-4.03257	-2.0117	3.69037e-07	1.30336e-05	0.790672	-1.26475	-0.338849	0.134877	0.316894	0.73932	-1.35259	-0.435729	0.0611523	0.179548	0.848731	-1.17823
1449319_at	Rspo1	R-spondin homolog (Xenopus laevis)	NM_138683	chr4:124986429-125009099 (+) // 92.38 // qD2.2 chr4:124986429-125009099 (+) // 92.38 //	NCBI 38	610.846	923.047	893.356	710.648	1012.81	650.211	280.083	267.186	548.417	1083.52	355.272	656.356	1187.07	238.951	222.441	66.1941	795.666	776.391	273.559	595.439	571.009	121.345	2.90856	2.90856	1.54031	0.0302019	0.0919059	2.8381	2.8381	1.50493	0.0335246	0.0981559	4.907	4.907	2.29484	0.00311212	0.0173619	4.70567	4.70567	2.2344	0.00373273	0.0206185	0.975775	-1.02483
1448291_at	Mmp9	matrix metallopeptidase 9	NM_013599	chr2:164948221-164955848 (+) // 88.77 // qH3 chr2:164948221-164955848 (+) // 88.77 // q	NCBI 38	108.19	132.904	146.492	145.193	136.422	118.092	632.207	1149.44	92.2367	68.0021	153.317	106.919	48.5824	137.679	325.688	439.572	128.187	132.745	852.449	98.7049	89.4265	378.369	0.150375	-6.65002	-2.73336	1.94446e-05	0.00026233	0.155721	-6.42173	-2.68296	2.34419e-05	0.000306436	0.26087	-3.83332	-1.9386	0.000469113	0.00380324	0.236348	-4.23105	-2.08102	0.000255669	0.00240027	1.03555	1.03555
1439161_at	Ppp6r3	protein phosphatase 6, regulatory subunit 3	NM_001164159 /// NM_028999 /// NM_029456	chr19:3454927-3575720 (-) // 97.46 // qA chr19:3510942-3575749 (-) // 94.56 // qA chr19	NCBI 38	148.26	160.278	199.6	132.774	148.101	189.205	447.824	493.12	145.488	158.296	183.995	167.696	138.135	170.574	187.522	232.292	168.02	154.953	469.92	161.824	158.096	208.711	0.35755	-2.79681	-1.48378	2.87374e-06	6.03111e-05	0.329745	-3.03265	-1.60058	1.25705e-06	3.26392e-05	0.775352	-1.28974	-0.367077	0.0736883	0.204315	0.757491	-1.32015	-0.400699	0.0535081	0.162258	0.922233	-1.08432
1439638_at	Erbb2ip	Erbb2 interacting protein	NM_001005868 /// NM_021563	chr13:103818792-103843635 (-) // 97.81 // qD1 chr13:103826582-103828286 (-) // 79.36 //	NCBI 38	52.0847	64.447	125.243	52.8467	58.6741	120.582	241.382	288.139	59.6564	60.7973	159.75	79.6841	61.1874	148.257	109.585	125.309	74.9123	72.0402	263.727	83.3656	89.7456	117.182	0.284052	-3.52048	-1.81577	0.00375954	0.0171307	0.273163	-3.66082	-1.87217	0.00305201	0.0144377	0.711419	-1.40564	-0.491229	0.357273	0.598787	0.765863	-1.30572	-0.384842	0.467887	0.697546	0.961665	-1.03986
1458969_at	AU019559	expressed sequence AU019559	---	chr8:11786261-11786893 (+) // 74.29 // qA1.1 chr8:11786261-11786893 (+) // 74.29 // qA1	NCBI 38	111.128	107.578	205.051	91.7875	80.4148	223.605	392.461	522.032	103.927	78.8849	232.103	143.61	97.4778	194.963	144.328	280.297	134.835	118.177	452.637	123.918	139.749	201.134	0.297889	-3.35696	-1.74715	0.00586007	0.0247064	0.261087	-3.83014	-1.9374	0.00295483	0.0140754	0.616099	-1.62312	-0.698766	0.210292	0.427287	0.694805	-1.43925	-0.52532	0.33981	0.57966	0.876459	-1.14095
1447184_at	AU021760	expressed sequence AU021760	---	chr17:78311697-78312055 (+) // 38.55 // qE2 chr17:78311697-78312055 (+) // 38.55 // qE2	NCBI 38	21.5537	24.4862	56.5712	14.1641	25.05	21.6312	28.085	77.0543	13.9208	24.672	44.2316	18.568	29.5568	33.8165	19.0266	22.4812	31.0226	19.7254	46.5194	24.7667	26.4759	20.6819	0.666875	-1.49953	-0.584512	0.301106	0.503137	0.424024	-2.35836	-1.23778	0.040218	0.113197	1.1975	1.1975	0.260026	0.639778	0.823571	1.28015	1.28015	0.356313	0.522915	0.741775	0.635838	-1.57273
1457806_at	Fam196a	family with sequence similarity 196, member A	NM_001143802	chr7:134917849-134918163 (+) // 99.68 // qF3 chr7:134899034-134918176 (-) // 99.86 // q	NCBI 38	60.7852	62.8876	121.647	72.0819	60.302	122.639	307.998	378.614	87.0064	63.8379	104.991	70.1706	69.4086	105.791	127.606	181.089	77.474	81.0826	341.485	83.5461	80.1689	152.013	0.226873	-4.40776	-2.14004	5.34411e-05	0.000577028	0.237442	-4.21156	-2.07435	7.19733e-05	0.000728471	0.549598	-1.81951	-0.863551	0.0330574	0.111912	0.52738	-1.89616	-0.923085	0.0242826	0.0894016	1.04658	1.04658
1437576_at	2810427A07Rik	RIKEN cDNA 2810427A07 gene	---	chr17:35920214-35920960 (+) // 97.25 // qB1 chr17:35920214-35920960 (+) // 97.25 // qB1	NCBI 38	225.57	312.666	392.297	163.379	285.097	239.062	433.235	1122.19	139.699	305.397	361.982	274.508	330.918	288.79	290.246	332.122	302.454	223.309	697.259	249.029	297.134	310.479	0.433776	-2.30534	-1.20498	0.0153898	0.053731	0.320268	-3.12239	-1.64265	0.00222209	0.011154	0.802078	-1.24676	-0.318186	0.474154	0.706003	0.957019	-1.04491	-0.0633805	0.885509	0.951027	0.738325	-1.35442
1442495_at	Birc6	baculoviral IAP repeat-containing 6	NM_007566	chr17:74528294-74703773 (+) // 98.37 // qE2 chr17:74528294-74703773 (+) // 98.37 // qE2	NCBI 38	29.8064	36.6021	34.1186	32.023	36.9818	30.9428	45.2562	78.2462	26.0192	33.8767	45.4676	30.721	33.786	41.0769	25.3285	27.7876	33.389	33.2152	59.5075	34.2215	34.9347	26.5296	0.561089	-1.78225	-0.833698	0.00534963	0.0229227	0.558169	-1.79157	-0.841226	0.0050495	0.0216831	1.28994	1.28994	0.367304	0.164659	0.36332	1.31682	1.31682	0.397058	0.135452	0.31836	0.994797	-1.00523
1441445_at	Per3	period circadian clock 3	NM_011067	chr4:151003656-151044621 (-) // 96.41 // qE2 chr4:151003656-151044621 (-) // 96.41 // q	NCBI 38	31.4331	18.9773	41.881	25.3518	27.3902	36.8796	56.4235	174.327	35.6684	32.5952	48.1568	36.5288	37.1699	33.6176	44.0667	44.3674	29.2335	29.4758	99.1795	38.2559	35.7381	44.2167	0.294752	-3.39268	-1.76243	0.000744406	0.00466168	0.297196	-3.36478	-1.75051	0.000785995	0.00482893	0.865189	-1.15582	-0.208913	0.611276	0.805388	0.808247	-1.23725	-0.307132	0.457609	0.689302	1.00829	1.00829
1429821_at	Proser1	proline and serine rich 1	NM_173382	chr3:53478133-53479905 (+) // 97.84 // qC chr3:53463665-53464748 (+) // 97.7 // qC chr3	NCBI 38	55.0107	73.6516	87.2386	59.3259	84.1163	134.436	155.33	278.166	53.0422	82.0521	92.6849	64.3166	84.7308	116.208	71.9407	119.457	70.7045	87.5412	207.863	73.8881	85.8752	92.7027	0.340147	-2.9399	-1.55577	0.00174542	0.00918771	0.421148	-2.37446	-1.2476	0.0076851	0.0306144	0.797042	-1.25464	-0.327272	0.422909	0.662508	0.926349	-1.07951	-0.110372	0.78456	0.903402	1.23813	1.23813
1456413_at	Pde4dip	phosphodiesterase 4D interacting protein (myomegalin)	NM_001039376 /// NM_001110163 /// NM_031401 /// NM_177145 /// NM_178080	chr3:97689820-97699830 (-) // 99.48 // qF2.2 chr3:97738845-97744752 (-) // 90.8 // qF2.	NCBI 38	121.172	185.76	276.271	129.199	191.003	252.257	145.86	188.475	91.6118	223.551	241.723	155.593	265.922	272.753	50.3394	108.659	183.893	183.956	165.805	170.428	224.305	73.9583	1.1091	1.1091	0.149389	0.763037	0.875959	1.10948	1.10948	0.149884	0.762273	0.875392	2.30438	2.30438	1.20438	0.0276372	0.0973574	3.03286	3.03286	1.60068	0.00582783	0.0292696	1.00035	1.00035
1440975_at	Mxra7	matrix-remodelling associated 7	NM_026280	chr11:116803061-116828046 (-) // 79.09 // qE2 chr11:116806577-116807374 (-) // 93.87 //	NCBI 38	2148.3	2722.52	2956.98	2207.95	2396.8	3019.8	817.494	1393.15	2157.67	3349.04	1035.12	2302.27	3087	1320.62	912.765	248.522	2586.17	2518.94	1067.19	1955.61	2109.38	476.271	2.42335	2.42335	1.277	0.0372332	0.10813	2.36038	2.36038	1.23902	0.0423045	0.117783	4.1062	4.1062	2.0378	0.0026804	0.0154116	4.42895	4.42895	2.14696	0.00184259	0.0117426	0.974013	-1.02668
1441477_at	Calu	calumenin	NM_007594 /// NM_184053	chr6:29348115-29376672 (+) // 96.72 // qA3.3 chr6:29349045-29349927 (+) // 87.63 // qA3	NCBI 38	243.966	266.348	479.947	222.103	291.919	539.758	378.403	429.808	165.837	355.359	379.066	306.947	362.549	422.818	152.412	212.672	314.763	327.089	403.289	281.636	361.016	180.038	0.780489	-1.28125	-0.35755	0.407018	0.611185	0.811054	-1.23296	-0.30213	0.481819	0.673483	1.56431	1.56431	0.645526	0.145933	0.333877	2.00522	2.00522	1.00376	0.0318776	0.109874	1.03916	1.03916
1453321_at	Fndc1	fibronectin type III domain containing 1	NM_001081416	chr17:7789008-7827302 (-) // 62.3 // qA1 chr17:7738579-7756395 (-) // 95.87 // qA1 chr1	NCBI 38	915.465	1102.49	462.103	1089.44	1501.72	342.196	584.173	633.826	1123.62	992.297	192.766	1561.04	1334.64	249.097	365.637	201.965	775.504	824.177	608.499	599.012	803.62	271.745	1.27446	1.27446	0.349886	0.700966	0.838597	1.35444	1.35444	0.437696	0.631505	0.788984	2.2043	2.2043	1.14032	0.223213	0.44472	2.95724	2.95724	1.56425	0.102929	0.262628	1.06276	1.06276
1440736_at	AI131651	expressed sequence AI131651	---	chr2:60121113-60121608 (-) // 99.0 // qC1.1 chr2:60121113-60121608 (-) // 99.0 // qC1.1	NCBI 38	87.1924	83.4915	164.214	84.3532	76.9633	113.586	419.497	267.851	76.723	112.227	106.883	88.8111	106.45	113.027	173.735	129.329	106.132	90.3242	335.203	97.2698	102.235	149.896	0.316618	-3.15838	-1.65918	0.000124452	0.00111945	0.269462	-3.71109	-1.89185	3.58138e-05	0.000424737	0.648913	-1.54104	-0.623903	0.0631985	0.182094	0.682036	-1.4662	-0.55208	0.0954795	0.248843	0.851064	-1.175
1436967_at	Ankrd11	ankyrin repeat domain 11	NM_001081379 /// NR_037865	chr8:122883320-122891029 (-) // 98.05 // qE1 chr8:122905755-122907217 (-) // 90.29 // q	NCBI 38	257.723	237.424	363.963	211.397	182.948	321.311	438.962	634.519	150.083	279.413	314.352	268.235	266.018	315.912	237.47	235.172	281.35	231.629	527.75	236.229	282.491	236.319	0.533111	-1.87578	-0.907492	0.0133715	0.0480074	0.438898	-2.27844	-1.18804	0.00246312	0.0121202	0.999622	-1.00038	-0.000545442	0.998636	0.999624	1.19538	1.19538	0.257469	0.430984	0.666524	0.823276	-1.21466
1454974_at	Ntn1	netrin 1	NM_008744	chr11:68212704-68386136 (-) // 99.86 // qB3 chr11:68209370-68212754 (-) // 93.21 // qB3	NCBI 38	620.426	693.714	617.11	727.592	710.038	752.408	526.672	940.252	663.167	864.384	639.514	645.281	860.663	880.202	341.894	290.619	642.802	729.811	703.711	715.704	787.764	315.217	0.913451	-1.09475	-0.130601	0.570225	0.747695	1.0371	1.0371	0.052555	0.818387	0.907082	2.27052	2.27052	1.18302	0.000155382	0.0015812	2.49912	2.49912	1.32142	5.53165e-05	0.000713828	1.13536	1.13536
1430077_at	Srsf11	serine/arginine-rich splicing factor 11	NM_001093752 /// NM_001093753 /// NM_026989	chr3:158010472-158031730 (-) // 91.01 // qH4 chr3:158030184-158031754 (-) // 90.29 // q	NCBI 38	134.082	101.076	198.36	107.321	102.466	203.697	244.208	219.688	101.098	90.2699	168.992	139.751	91.2103	186.963	90.0693	120.082	139.045	130.843	231.624	115.536	133.573	103.999	0.600308	-1.66581	-0.736225	0.0812168	0.196754	0.564895	-1.77024	-0.823945	0.0542947	0.142728	1.11094	1.11094	0.151781	0.702859	0.860959	1.28437	1.28437	0.361061	0.370532	0.61172	0.941008	-1.06269
1444371_at	A630007B06Rik	RIKEN cDNA A630007B06 gene	NM_170757	chr19:56787711-56789744 (-) // 89.96 // qD2 chr19:56787485-56788369 (-) // 98.66 // qD2	NCBI 38	37.6293	62.4638	76.0668	34.0825	72.6158	45.9989	60.3903	142.396	33.3445	67.7385	72.7737	39.7338	75.1068	63.3231	41.9019	41.4553	56.3358	48.466	92.7323	54.7786	57.3853	41.6779	0.607507	-1.64607	-0.719027	0.143475	0.301194	0.522642	-1.91335	-0.936105	0.0637497	0.161599	1.31433	1.31433	0.394328	0.408467	0.649839	1.37687	1.37687	0.461392	0.335838	0.576059	0.860307	-1.16238
1415913_at	Rps13	ribosomal protein S13	NM_026533	chr7:116331509-116334120 (-) // 71.18 // qF1 chr7:116331509-116334120 (-) // 71.18 // q	NCBI 38	98.2566	120.231	238.799	114.877	138.97	221.565	253.018	335.473	99.1077	166.29	189.917	125.883	171.144	180.159	114.91	149.232	141.298	152.365	291.342	146.278	157.155	130.952	0.484989	-2.0619	-1.04398	0.0186016	0.0625011	0.522974	-1.91214	-0.935189	0.0315594	0.0937222	1.11704	1.11704	0.159681	0.687217	0.852006	1.2001	1.2001	0.263155	0.509326	0.731052	1.07832	1.07832
1428083_at	Neat1	nuclear paraspeckle assembly transcript 1 (non-protein coding)	NR_003513	chr19:5842301-5844643 (-) // 96.92 // qA chr19:5842301-5844643 (-) // 96.92 // qA chr19	NCBI 38	2715.7	3481.37	5225.73	3608.16	4722.11	5016.66	2784.53	5641.99	1220.68	4335.73	6865.84	4751.19	6243.95	6062.83	1334.45	2382.34	3669.33	4404.92	3963.61	3312.26	5644.77	1783.01	0.925779	-1.08017	-0.11126	0.848319	0.925004	1.11136	1.11136	0.152326	0.7936	0.893378	1.85762	1.85762	0.893455	0.141402	0.327062	3.16584	3.16584	1.66259	0.0121597	0.0521554	1.20046	1.20046
1433863_at	Btf3	basic transcription factor 3	NM_001170540 /// NM_145455	chr13:98309897-98316971 (-) // 91.81 // qD1 chr13:98309901-98310510 (-) // 67.53 // qD1	NCBI 38	43.146	69.6707	94.03	39.6959	56.4762	78.2251	84.0114	175.307	30.8059	62.4578	93.1537	55.3465	59.9266	87.5329	34.4965	86.5259	65.6276	55.9738	121.358	56.3819	66.2156	54.6337	0.540776	-1.84919	-0.886897	0.115627	0.257056	0.461229	-2.16812	-1.11644	0.0536514	0.141435	1.032	1.032	0.045443	0.932435	0.974736	1.21199	1.21199	0.277378	0.60667	0.801074	0.852903	-1.17247
1453906_at	Med13l	mediator complex subunit 13-like	NM_172424	chr5:118750386-118765438 (+) // 95.53 // qF chr5:118750386-118765438 (+) // 95.53 // qF	NCBI 38	29.0956	29.6755	33.9029	26.1394	27.9631	44.9033	49.5037	63.736	27.484	29.3216	35.3184	34.9259	29.282	28.798	25.7067	24.946	30.819	32.0173	56.1709	30.532	30.8819	25.3234	0.548667	-1.8226	-0.865997	0.00148321	0.00806929	0.57	-1.75439	-0.810966	0.00239823	0.0118677	1.20568	1.20568	0.269847	0.232438	0.457065	1.2195	1.2195	0.28629	0.206777	0.423613	1.03888	1.03888
1418509_at	Cbr2	carbonyl reductase 2	NM_007621	chr11:120729096-120731981 (-) // 86.29 // qE2 chr11:120729096-120731981 (-) // 86.29 //	NCBI 38	337.856	441.644	1361	466.884	506.719	1067.56	384.613	302.985	470.344	576.948	1332.36	668.143	716.752	1091.15	219.412	108.605	587.799	632.118	341.379	712.443	805.477	154.373	1.72184	1.72184	0.783951	0.208781	0.393412	1.85167	1.85167	0.888827	0.157681	0.318162	4.61505	4.61505	2.20635	0.00259674	0.0150148	5.2177	5.2177	2.38341	0.00147945	0.00981826	1.0754	1.0754
1435227_at	Bcl11b	B cell leukemia/lymphoma 11B	NM_001079883 /// NM_021399	chr12:107912549-107913972 (-) // 98.03 // qF1 chr12:107912549-107913972 (-) // 98.03 //	NCBI 38	53.3778	50.8118	50.7423	47.2981	48.05	46.9251	897.073	1588.06	62.7313	44.8777	51.0543	58.4598	43.5931	48.9365	665.795	437.695	51.6297	47.4222	1193.6	52.382	49.9617	539.829	0.0432565	-23.1179	-4.53094	8.58558e-11	2.59878e-08	0.0397313	-25.1691	-4.65358	6.15672e-11	1.93864e-08	0.0970345	-10.3056	-3.36536	3.32756e-09	3.89809e-07	0.0925507	-10.8049	-3.43361	2.60775e-09	3.2311e-07	0.918506	-1.08872
1444328_at	Clta	clathrin, light polypeptide (Lca)	NM_001080384 /// NM_001080385 /// NM_001080386 /// NM_016760	chr4:44012677-44032846 (+) // 98.82 // qB1 chr4:44012653-44032846 (+) // 96.48 // qB1 c	NCBI 38	286.654	294.407	541.295	365.437	307.544	577.745	519.7	1074.08	257.706	285.779	777.722	417.599	306.663	583.154	258.98	440.835	357.458	401.916	747.075	385.463	421.115	337.892	0.478477	-2.08997	-1.06348	0.0556672	0.147763	0.537986	-1.85879	-0.894359	0.100553	0.228213	1.14079	1.14079	0.190033	0.713035	0.866879	1.2463	1.2463	0.317651	0.540738	0.755134	1.12437	1.12437
1428748_at	5830428H23Rik	RIKEN cDNA 5830428H23 gene	NM_001001737 /// XR_105997	chr19:60878009-61125091 (-) // 12.76 // qD3 chr19:60878009-61125091 (-) // 12.76 // qD3	NCBI 38	70.3466	146.596	251.867	77.0716	180.985	234.829	97.8138	245.57	66.7983	125.894	284.936	119.795	153.162	274.517	34.3553	143.158	137.461	148.512	154.984	133.815	171.416	70.13	0.886934	-1.12748	-0.173101	0.826341	0.91257	0.958242	-1.04358	-0.061538	0.937779	0.970038	1.9081	1.9081	0.932137	0.249629	0.478902	2.44427	2.44427	1.2894	0.119494	0.291965	1.0804	1.0804
1442886_at	Tra2a	transformer 2 alpha homolog (Drosophila)	NM_198102	chr6:49262927-49264045 (-) // 98.67 // qB2.3 chr6:49262924-49263336 (+) // 99.27 // qB2	NCBI 38	86.4927	222.285	336.886	81.5958	228.635	188.981	250.215	600.739	73.3538	204.797	361.002	160.086	185.871	311.855	121.763	252.784	186.404	152.198	387.704	175.693	210.139	175.442	0.480792	-2.0799	-1.05652	0.166192	0.334932	0.392564	-2.54736	-1.349	0.0838125	0.199117	1.00143	1.00143	0.00206158	0.997763	0.999523	1.19777	1.19777	0.260351	0.723445	0.870619	0.816495	-1.22475
1440540_at	Gle1	GLE1 RNA export mediator (yeast)	NM_028923	chr2:29935410-29959432 (+) // 97.09 // qB chr2:29943722-29944764 (+) // 78.24 // qB chr	NCBI 38	82.8392	78.9244	114.578	77.0647	67.2314	135.106	113.086	219.482	64.2655	83.3099	111.424	91.0994	80.5441	91.3799	61.9633	82.233	90.8201	88.7786	157.534	84.182	87.5212	71.3821	0.576513	-1.73457	-0.794575	0.0351609	0.103437	0.563553	-1.77445	-0.827377	0.029364	0.0885911	1.17931	1.17931	0.237943	0.493466	0.721677	1.22609	1.22609	0.294065	0.399557	0.638591	0.97752	-1.023
1439953_at	Pmm2	phosphomannomutase 2	NM_016881	chr16:8637722-8649106 (+) // 96.49 // qA1 chr16:8637734-8657530 (+) // 99.37 // qA1 chr	NCBI 38	104.62	161.78	288.875	101.673	176.591	155.61	171.988	403.513	103.226	216.374	293.634	178.949	208.396	240.391	76.8916	185.346	169.729	140.845	263.444	187.191	207.741	119.387	0.644273	-1.55214	-0.634256	0.257756	0.454388	0.534629	-1.87046	-0.90339	0.11576	0.253391	1.56794	1.56794	0.64887	0.247479	0.475864	1.74006	1.74006	0.799137	0.159775	0.357282	0.829817	-1.20509
1440740_at	Ctdspl2	CTD (carboxy-terminal domain, RNA polymerase II, polypeptide A) small phosphatase like	NM_212450	chr2:122007719-122013891 (+) // 97.9 // qE5 chr2:122014422-122015322 (+) // 60.13 // qE	NCBI 38	86.7154	93.6762	88.519	81.5171	75.472	94.4362	130.132	179.453	79.1151	98.3237	83.0567	87.7817	88.43	80.8735	51.0144	94.1384	89.589	83.4431	152.816	86.4498	85.6256	69.2994	0.586255	-1.70574	-0.7704	0.00424346	0.0189246	0.546038	-1.83137	-0.872927	0.00177091	0.00930665	1.24748	1.24748	0.319017	0.175102	0.378096	1.23559	1.23559	0.3052	0.193214	0.40561	0.931402	-1.07365
1446550_at	Gspt1	G1 to S phase transition 1	NM_001130008 /// NM_146066	chr16:11219712-11254325 (-) // 97.74 // qA1 chr16:11219712-11254325 (-) // 97.74 // qA1	NCBI 38	49.1376	79.1642	106.11	42.8451	43.934	51.7301	71.036	128.887	55.8343	108.95	83.992	76.9903	131.517	64.851	40.0126	47.0669	74.4562	46.006	95.6849	79.9447	86.9184	43.3966	0.778135	-1.28512	-0.361908	0.360501	0.566453	0.480807	-2.07984	-1.05647	0.0161197	0.0553494	1.84218	1.84218	0.881414	0.0382004	0.124937	2.00289	2.00289	1.00208	0.0211272	0.0803355	0.617896	-1.61839
1455021_at	Gabbr1	gamma-aminobutyric acid (GABA) B receptor, 1	NM_019439	chr17:37050853-37072428 (+) // 100.0 // qB1 chr17:37046019-37074289 (+) // 89.44 // qB1	NCBI 38	389.147	410.797	513.528	357.212	450.061	519.628	827.509	1305.94	279.528	511.981	378.226	401.231	598.438	390.339	434.61	511.585	434.611	437.152	1039.59	378.277	454.24	471.528	0.418075	-2.39192	-1.25817	0.000691197	0.00438942	0.420516	-2.37803	-1.24977	0.000729605	0.00455508	0.802235	-1.24652	-0.317903	0.282949	0.51806	0.963333	-1.03806	-0.0538935	0.852295	0.935694	1.00584	1.00584
1441266_at	Strn3	striatin, calmodulin binding protein 3	NM_001172098 /// NM_052973	chr12:51608540-51691887 (-) // 94.42 // qB3 chr12:51608540-51691887 (-) // 94.42 // qB3	NCBI 38	135.293	153.911	343.682	125.39	144.292	265.737	290.882	436.186	116.139	140.49	322.412	149.201	155.86	262.93	120.365	217.887	192.705	168.775	356.202	173.918	182.855	161.939	0.541001	-1.84842	-0.886297	0.107378	0.243043	0.47382	-2.1105	-1.07759	0.0555926	0.145383	1.07397	1.07397	0.102954	0.843849	0.936397	1.12916	1.12916	0.17525	0.737701	0.878861	0.875821	-1.14179
1442700_at	Pde4b	phosphodiesterase 4B, cAMP specific	NM_001177980 /// NM_001177981 /// NM_001177982 /// NM_001177983 /// NM_019840	chr4:102254741-102607262 (+) // 97.73 // qC6 chr4:102254741-102607262 (+) // 97.73 // q	NCBI 38	305.437	298.521	493.429	323.047	217.789	452.575	1149.81	1190.07	207.053	143.826	528.349	369.054	137.076	651.216	510.562	555.235	355.666	316.956	1169.68	250.579	320.573	532.431	0.304064	-3.28878	-1.71755	0.0131471	0.0473713	0.27097	-3.69045	-1.88379	0.00771937	0.0307127	0.470634	-2.12479	-1.08732	0.0921267	0.240327	0.602095	-1.66087	-0.731937	0.24251	0.470342	0.891158	-1.12214
1450334_at	Il21	interleukin 21	NM_021782	chr3:37222762-37232618 (-) // 95.7 // qB chr3:37222762-37232618 (-) // 95.7 // qB	NCBI 38	14.8436	14.3528	12.4227	15.8867	15.4779	15.066	26.7967	84.9092	15.0067	12.5191	15.1222	15.1111	13.2376	15.6033	25.5558	18.4712	13.8324	15.4732	47.7001	14.163	14.6141	21.7267	0.289987	-3.44843	-1.78594	0.000149848	0.00129643	0.324387	-3.08274	-1.62421	0.000346233	0.00252273	0.651874	-1.53404	-0.617335	0.0902876	0.2369	0.672636	-1.48669	-0.572102	0.113695	0.282056	1.11862	1.11862
1441558_at	D230044B12Rik	RIKEN cDNA D230044B12 gene	---	chr15:80832553-80833213 (+) // 91.11 // qE1 chr15:80832553-80833213 (+) // 91.11 // qE1	NCBI 38	24.7097	23.2825	30.8299	22.4776	25.6364	34.3316	56.0048	80.5216	29.7429	25.3046	31.5605	24.9982	27.6661	24.8506	35.9712	26.1246	26.0789	27.0457	67.1535	28.7458	25.8066	30.655	0.388348	-2.57501	-1.36458	3.20535e-05	0.000389032	0.402746	-2.48295	-1.31206	4.7047e-05	0.000522241	0.937721	-1.06642	-0.0927694	0.678677	0.846958	0.84184	-1.18787	-0.248382	0.277164	0.512752	1.03708	1.03708
1437799_at	Uvssa	UV stimulated scaffold protein A	NM_001081101	chr5:33378695-33414908 (+) // 98.55 // qB1 chr5:33409936-33410521 (+) // 88.38 // qB1 c	NCBI 38	81.8763	88.3944	127.269	95.1051	80.4285	114.943	87.5122	212.378	77.0088	89.3408	94.4432	88.2341	93.3838	91.3322	48.7296	79.5154	97.2974	95.7998	136.329	86.6123	90.9587	62.2473	0.713695	-1.40116	-0.48662	0.157423	0.322211	0.702711	-1.42306	-0.508997	0.140603	0.292308	1.39142	1.39142	0.476558	0.165508	0.364535	1.46124	1.46124	0.547193	0.115461	0.284946	0.984609	-1.01563
1438816_at	Ahctf1	AT hook containing transcription factor 1	NM_026375	chr1:179744895-179803837 (-) // 99.03 // qH4 chr1:179789125-179790115 (-) // 82.34 // q	NCBI 38	29.7183	71.8075	89.015	29.0892	72.4773	76.6899	68.89	170.573	36.1201	73.2595	91.0821	58.4557	72.4285	80.7329	29.5448	83.0039	57.4849	54.4783	108.401	62.2322	69.9189	49.5211	0.530297	-1.88573	-0.915128	0.160756	0.327133	0.502563	-1.9898	-0.992624	0.130692	0.277198	1.25668	1.25668	0.329617	0.601029	0.798792	1.41191	1.41191	0.497648	0.433008	0.668098	0.947701	-1.05519
1437074_at	Snx5	sorting nexin 5	NM_001199188 /// NM_024225	chr2:144250125-144270906 (-) // 98.54 // qG1 chr2:144250125-144270906 (-) // 98.54 // q	NCBI 38	147.769	163.666	347.172	159.951	147.506	375.45	969.335	501.289	175.684	179.373	472.323	255.03	131.164	446.814	305.797	333.145	203.246	206.903	697.07	245.987	246.327	319.179	0.291571	-3.42969	-1.77808	0.0108997	0.0407448	0.296817	-3.36908	-1.75235	0.0118353	0.0432319	0.77069	-1.29754	-0.375777	0.540787	0.755577	0.771752	-1.29575	-0.373791	0.542908	0.756651	1.01799	1.01799
1450990_at	Gpc3	glypican 3	NM_016697	chrX:52272425-52613972 (-) // 96.0 // qA5 chrX:52272425-52613972 (-) // 96.0 // qA5	NCBI 38	761.549	849.303	345.429	748.877	905.656	516.009	473.788	319.967	602.446	980.687	281.341	700.366	1207.61	221.968	324.725	97.9161	606.784	704.707	389.354	549.822	572.591	178.314	1.55844	1.55844	0.640103	0.387569	0.592832	1.80994	1.80994	0.855942	0.253328	0.444532	3.08343	3.08343	1.62454	0.0410984	0.132351	3.21112	3.21112	1.68308	0.0353254	0.118967	1.16138	1.16138
1452106_at	Npnt	nephronectin	NM_001029836 /// NM_033525	chr3:132884429-132950043 (-) // 99.73 // qG3 chr3:132881744-132950291 (-) // 90.44 // q	NCBI 38	1368.2	1121.44	600.606	1037.45	961.865	670.86	111.713	91.1912	1307.57	1366.1	410.355	1070.34	1300.65	668.011	49.1245	43.5112	973.131	874.794	100.933	901.635	976.076	46.233	9.64137	9.64137	3.26924	1.44109e-05	0.000207385	8.66707	8.66707	3.11554	2.34476e-05	0.000306436	19.5021	19.5021	4.28556	7.92998e-07	2.48571e-05	21.1122	21.1122	4.40001	5.9033e-07	2.04961e-05	0.898947	-1.11241
1444299_at	A430093F15Rik	RIKEN cDNA A430093F15 gene	NM_207529 /// NR_027805	chr19:10755882-10786043 (+) // 76.91 // qA chr19:10755882-10786043 (+) // 76.91 // qA	NCBI 38	48.7314	39.1692	27.7357	41.9306	33.7552	41.1137	131.655	185.235	43.9162	43.8099	38.8924	42.0648	30.7354	40.2137	82.5197	62.4915	37.5489	38.7512	156.164	42.1395	37.3232	71.8109	0.240446	-4.15894	-2.05622	1.05597e-06	2.83653e-05	0.248145	-4.0299	-2.01074	1.35197e-06	3.46244e-05	0.58681	-1.70413	-0.769035	0.00671677	0.0321278	0.519741	-1.92403	-0.944135	0.00166432	0.0108128	1.03202	1.03202
1432007_s_at	Ap2a2	adaptor-related protein complex 2, alpha 2 subunit	NM_007459	chr7:141562207-141603156 (+) // 96.73 // qF5 chr7:141562207-141603156 (+) // 96.73 // q	NCBI 38	364.873	387.278	580.672	361.33	345.675	500.959	996.252	1784.63	212.499	365.368	513.982	394.858	453.676	428.364	454.528	828.626	434.541	397.001	1333.41	341.727	424.944	613.704	0.325892	-3.0685	-1.61753	0.000835786	0.00512297	0.297737	-3.35867	-1.74789	0.00044335	0.00306398	0.556826	-1.79589	-0.844702	0.0417014	0.133815	0.692426	-1.4442	-0.530268	0.179429	0.386466	0.913608	-1.09456
1442151_at	D230040A04Rik	RIKEN cDNA D230040A04 gene	---	chr13:14067874-14069062 (+) // 78.04 // qA1 chr13:14067874-14069062 (+) // 78.04 // qA1	NCBI 38	78.6648	69.0259	124.355	62.5392	86.0668	69.472	219.627	240.172	81.7327	83.2058	68.182	71.569	87.9851	84.3969	123.585	90.4696	87.7307	72.0442	229.67	77.3999	81.0006	105.739	0.381986	-2.61789	-1.38841	5.56388e-05	0.000595201	0.313686	-3.1879	-1.67261	8.60837e-06	0.000140212	0.731992	-1.36614	-0.4501	0.0787187	0.214299	0.766043	-1.30541	-0.384503	0.127024	0.304631	0.821198	-1.21773
1436240_at	B230214O09Rik	RIKEN cDNA B230214O09 gene	---	chr6:49255826-49256987 (-) // 77.86 // qB2.3 chr6:49255826-49256987 (-) // 77.86 // qB2	NCBI 38	269.11	635.925	845.957	292.671	621.634	603.079	646.727	1024.85	181.887	634.275	903.749	522.083	652.351	743.185	269.939	520.7	525.086	478.737	814.116	470.663	632.565	374.91	0.644978	-1.55044	-0.632678	0.334128	0.539468	0.588046	-1.70055	-0.765999	0.246225	0.435418	1.2554	1.2554	0.328147	0.611585	0.805628	1.68725	1.68725	0.754674	0.252927	0.482684	0.911731	-1.09681
1459961_a_at	Stat3	signal transducer and activator of transcription 3	NM_011486 /// NM_213659 /// NM_213660	chr11:100887347-100939502 (-) // 97.33 // qD chr11:100888235-100939387 (-) // 96.73 //	NCBI 38	175.075	150.885	247.825	162.902	151.643	226.195	540.01	550.016	137.524	156.396	166.946	164.008	151.423	170.19	296.042	212.85	187.069	177.446	544.992	153.13	161.681	251.019	0.343253	-2.9133	-1.54266	1.12284e-05	0.000171319	0.325596	-3.07129	-1.61885	6.80072e-06	0.00011627	0.610034	-1.63925	-0.713038	0.00709137	0.0335566	0.644099	-1.55256	-0.634646	0.0138964	0.0579619	0.948559	-1.05423
1455494_at	Col1a1	collagen, type I, alpha 1	NM_007742	chr11:94936252-94952209 (+) // 94.49 // qD chr11:94952609-94953046 (+) // 76.81 // qD c	NCBI 38	9263.27	9892.83	7510.04	9533.35	10296.3	9067.02	403.427	94.6626	9329.42	9729.99	5592.53	8904.75	9823.39	5799.05	124.665	65.0105	8828.79	9619.19	195.419	7976.83	7975.17	90.0241	45.1782	45.1782	5.49755	4.37331e-08	2.55478e-06	49.2221	49.2221	5.62123	3.36433e-08	2.10742e-06	88.61	88.61	6.4694	6.28485e-09	6.1089e-07	88.5894	88.5894	6.46906	6.2892e-09	6.23405e-07	1.08951	1.08951
1445363_at	2810055G20Rik	RIKEN cDNA 2810055G20 gene	NR_015543	chr16:77329179-77594924 (+) // 99.25 // qC3.1 chr16:77363020-77363681 (+) // 40.33 // q	NCBI 38	23.7464	24.5142	36.9004	22.6576	23.9852	39.331	49.8075	127.318	25.4596	18.0095	45.799	21.3032	21.8481	49.4434	31.0093	43.4368	27.7982	27.7522	79.6328	27.589	28.444	36.7008	0.349079	-2.86468	-1.51837	0.00847969	0.0333022	0.348502	-2.86942	-1.52076	0.00840081	0.0328238	0.751729	-1.33027	-0.411715	0.415336	0.655724	0.775021	-1.29029	-0.367693	0.465769	0.696127	0.998347	-1.00166
1430653_at	A930026B05Rik	RIKEN cDNA A930026B05 gene	---	chr6:72375741-72377086 (-) // 18.16 // qC1 chr6:72375741-72377086 (-) // 18.16 // qC1	NCBI 38	94.5929	75.9528	122.799	88.2184	93.5162	116.423	232.522	632.367	80.4958	96.2866	100.174	94.3857	97.93	102.212	134.147	233.215	95.9061	98.6577	383.43	91.9062	98.119	176.863	0.250126	-3.99799	-1.99927	7.51339e-05	0.000756724	0.257302	-3.88648	-1.95847	9.12246e-05	0.000879315	0.519643	-1.9244	-0.944407	0.0184648	0.0712326	0.554773	-1.80254	-0.850031	0.0306868	0.106675	1.02869	1.02869
1430628_at	A230083N12Rik	RIKEN cDNA A230083N12 gene	---	chr4:74250864-74252586 (-) // 92.84 // qC3 chr4:74250864-74252586 (-) // 92.84 // qC3	NCBI 38	72.4429	53.4208	49.214	70.5907	54.4884	53.766	82.6768	233.797	55.6388	55.5593	54.0468	72.3693	58.7166	48.5075	66.2908	62.3163	57.5351	59.1362	139.031	55.0767	59.0711	64.273	0.413828	-2.41646	-1.2729	0.00213739	0.0108227	0.425345	-2.35103	-1.23329	0.00267695	0.012989	0.856921	-1.16697	-0.222766	0.514838	0.737345	0.919067	-1.08806	-0.121758	0.720247	0.869175	1.02783	1.02783
1456683_at	Sltm	SAFB-like, transcription modulator	NM_025690 /// NM_026337	chr9:70579218-70592234 (+) // 94.36 // qD chr9:70542812-70580222 (+) // 91.08 // qD chr	NCBI 38	97.319	100.992	157.208	89.925	102.263	177.295	145.607	199.5	65.528	99.1077	149.705	99.3552	109.756	154.154	51.2949	121.119	115.607	117.697	170.436	99.0654	118.903	78.8211	0.678302	-1.47427	-0.56	0.210112	0.395172	0.690562	-1.4481	-0.534157	0.230645	0.416325	1.25684	1.25684	0.329801	0.451262	0.686171	1.50851	1.50851	0.593124	0.185991	0.39497	1.01807	1.01807
1456956_at	Ikzf2	IKAROS family zinc finger 2	NM_011770	chr1:69538678-69685834 (-) // 97.4 // qC3 chr1:69534244-69535486 (-) // 95.7 // qC3 chr	NCBI 38	17.6224	32.5273	41.8583	22.6876	27.3269	45.6012	89.6358	81.774	26.2002	27.2582	39.3297	33.825	31.5022	49.9194	43.8716	35.8232	28.8424	30.4639	85.6149	30.3977	37.6083	39.6437	0.336886	-2.96836	-1.56967	0.000831548	0.00510184	0.355825	-2.81037	-1.49076	0.0012439	0.00700913	0.766774	-1.30416	-0.383127	0.309588	0.547942	0.948656	-1.05412	-0.0760431	0.836985	0.928485	1.05622	1.05622
1453328_at	2700008G24Rik /// Xkr6	RIKEN cDNA 2700008G24 gene /// X Kell blood group precursor related family member 6 hom	NM_173393	chr14:63795018-63820014 (+) // 95.89 // qD1 chr14:63664377-63666180 (+) // 98.41 // qD1	NCBI 38	62.3145	77.6683	122.72	55.2862	96.5173	124.797	216.436	313.483	66.8398	70.6799	96.4468	71.5954	75.9085	120.35	121.438	120.191	84.059	87.326	260.478	76.9495	86.804	120.813	0.322709	-3.09877	-1.63169	0.000580113	0.00382734	0.335251	-2.98284	-1.57669	0.000766367	0.00473343	0.636931	-1.57003	-0.650791	0.0941638	0.244523	0.7185	-1.39179	-0.47694	0.2084	0.425836	1.03887	1.03887
1439467_at	Map4	microtubule-associated protein 4	NM_001205330 /// NM_001205331 /// NM_001205332 /// NM_008633	chr9:109931457-110083950 (+) // 98.17 // qF2 chr9:109931457-110083950 (+) // 98.17 // q	NCBI 38	66.4217	66.9317	133.36	45.1676	67.4083	124.797	96.9825	256.311	73.8542	74.9657	103.86	92.035	72.9359	110.422	54.7623	97.8958	84.0083	72.4292	157.662	83.1567	90.5003	73.1989	0.532839	-1.87674	-0.908228	0.0816603	0.197587	0.459398	-2.17676	-1.12218	0.0364962	0.104935	1.13604	1.13604	0.184014	0.708782	0.864464	1.23637	1.23637	0.306111	0.536041	0.751717	0.86217	-1.15986
1445588_at	Ankrd44	ankyrin repeat domain 44	NM_001081433	chr1:54645341-54647090 (-) // 95.74 // qC1.2 chr1:54728986-54729642 (-) // 100.0 // qC1	NCBI 38	35.5061	27.577	38.7877	27.0699	29.4896	27.4464	98.5346	279.486	31.836	33.955	40.6276	33.1833	32.2985	30.6494	78.8746	75.2908	33.6135	27.9821	165.946	35.2815	32.0266	77.0621	0.202557	-4.93689	-2.3036	5.36273e-06	9.63603e-05	0.168621	-5.93045	-2.56814	1.6625e-06	4.06177e-05	0.457834	-2.1842	-1.1271	0.00308958	0.0172732	0.415597	-2.40618	-1.26674	0.00132395	0.00898456	0.832465	-1.20125
1457561_at	Itga5	integrin alpha 5 (fibronectin receptor alpha)	NM_010577	chr15:103344291-103366577 (-) // 94.52 // qF3 chr15:103344291-103366577 (-) // 94.52 //	NCBI 38	99.6007	113.73	190.014	72.3296	93.296	113.889	54.5957	93.2778	78.2895	125.066	153.69	104.79	107.192	127.956	40.913	26.8876	129.114	91.5984	71.3623	114.594	112.854	33.1671	1.80928	1.80928	0.855416	0.0289664	0.0890837	1.28357	1.28357	0.360162	0.319799	0.519588	3.45506	3.45506	1.78871	0.000197071	0.00189998	3.40258	3.40258	1.76663	0.00022006	0.00213948	0.709436	-1.40957
1451978_at	Loxl1	lysyl oxidase-like 1	NM_010729	chr9:58287724-58288568 (-) // 78.46 // qB chr9:58288600-58313184 (-) // 93.0 // qB chr9	NCBI 38	5401.02	5774.69	4934.66	5507.83	5481.62	4695.84	499.797	241.252	5273.39	7028.09	2835.51	5327.54	7453.21	2864.71	307.677	84.659	5358.82	5214.09	347.245	4719.11	4845.06	161.394	15.4329	15.4329	3.94794	5.3548e-06	9.62946e-05	15.016	15.016	3.90843	5.95468e-06	0.000105112	29.2392	29.2392	4.86983	5.39485e-07	1.8659e-05	30.0209	30.0209	4.9079	4.94149e-07	1.78722e-05	0.97299	-1.02776
1431528_at	5830427D02Rik	RIKEN cDNA 5830427D02 gene	---	chr15:102607600-102608917 (-) // 26.37 // qF3 chr15:102607600-102608917 (-) // 26.37 //	NCBI 38	34.8471	39.094	52.6079	39.0009	32.3458	48.9067	69.0474	121.86	47.7077	45.5949	49.5969	42.1915	33.4361	45.4527	44.9684	40.4657	41.5351	39.5093	91.7286	47.605	40.0225	42.6576	0.452805	-2.20845	-1.14304	0.000546035	0.00364733	0.43072	-2.3217	-1.21518	0.000326093	0.00240548	1.11598	1.11598	0.158311	0.538294	0.753588	0.938227	-1.06584	-0.0919911	0.719564	0.868764	0.951225	-1.05128
1451446_at	Antxr1	anthrax toxin receptor 1	NM_054041	chr6:87157759-87308357 (-) // 95.35 // qD1 chr6:87133852-87335821 (-) // 94.71 // qD1 c	NCBI 38	3018.93	3562.91	3450.64	2946.94	3717.17	3403.81	352.148	213.323	2916.34	2794.29	2042.46	3175.37	2834.7	1885.36	212.974	76.4292	3335.76	3340.62	274.081	2553.22	2569.73	127.583	12.1705	12.1705	3.60532	2.27786e-07	8.88699e-06	12.1889	12.1889	3.6075	2.26195e-07	8.94881e-06	20.012	20.012	4.32279	2.74391e-08	1.8902e-06	20.1421	20.1421	4.33214	2.67466e-08	1.8587e-06	1.00151	1.00151
1429951_at	Ssbp2	single-stranded DNA binding protein 2	NM_024186 /// NM_024272	chr13:91461162-91565213 (+) // 91.04 // qC3 chr13:91461162-91565213 (+) // 91.04 // qC3	NCBI 38	23.7156	25.2433	64.5186	17.0118	31.0435	53.9583	55.598	61.9178	29.2805	33.1065	37.4697	22.263	34.2336	34.4466	29.9318	25.0485	33.803	30.5441	58.6728	33.1175	29.7208	27.3815	0.576126	-1.73573	-0.795544	0.10475	0.238285	0.520582	-1.92093	-0.941803	0.0595625	0.153102	1.20948	1.20948	0.274387	0.557628	0.768395	1.08544	1.08544	0.11828	0.799362	0.911048	0.903591	-1.1067
1438824_at	Slc20a1	solute carrier family 20, member 1	NM_001159593 /// NM_015747	chr2:129200519-129201254 (+) // 98.92 // qF1 chr2:129200519-129201254 (+) // 98.92 // q	NCBI 38	31.7154	43.5799	58.1149	28.4054	38.584	35.392	46.9836	151.995	34.9843	22.572	75.4348	43.0753	27.8239	61.9524	38.3565	40.6194	43.1468	33.8511	84.5059	39.0546	42.0309	39.4718	0.510576	-1.95857	-0.969802	0.0889583	0.210477	0.400575	-2.49641	-1.31986	0.0265572	0.081954	0.98943	-1.01068	-0.0153305	0.977242	0.992201	1.06483	1.06483	0.0906231	0.866151	0.942063	0.784555	-1.27461
1440311_at	Sorbs1	sorbin and SH3 domain containing 1	NM_001034962 /// NM_001034963 /// NM_001034964 /// NM_009166 /// NM_178362	chr19:40294155-40513750 (-) // 97.06 // qC3 chr19:40294945-40451387 (-) // 97.46 // qC3	NCBI 38	28.7044	33.6234	48.8844	27.1783	29.4937	35.793	43.1059	106.717	31.1637	34.3415	30.966	28.9453	31.6895	31.7542	31.6263	31.7712	36.1344	30.6138	67.8356	32.1207	30.7678	31.6987	0.532674	-1.87732	-0.908675	0.0103501	0.0390888	0.451292	-2.21586	-1.14787	0.00229328	0.0114489	1.01331	1.01331	0.0190756	0.950724	0.982441	0.970638	-1.03025	-0.0429948	0.889292	0.95203	0.847221	-1.18033
1444064_at	Samhd1	SAM domain and HD domain, 1	NM_001139520 /// NM_018851	chr2:157099032-157135151 (-) // 91.34 // qH1 chr2:157099400-157099503 (-) // 44.44 // q	NCBI 38	56.2637	66.7935	110.933	50.6714	67.3836	118.239	179.528	360.879	48.0589	88.2302	160.978	92.2254	89.5729	128.061	98.7112	143.348	74.7038	73.9081	254.535	88.0481	101.894	118.954	0.293491	-3.40726	-1.76861	0.00342809	0.0158884	0.290366	-3.44393	-1.78406	0.00323033	0.0151226	0.740185	-1.35101	-0.434042	0.396018	0.637883	0.856581	-1.16743	-0.223338	0.658929	0.833897	0.989353	-1.01076
1418751_at	Sit1	suppression inducing transmembrane adaptor 1	NM_019436	chr4:43482082-43483734 (-) // 99.59 // qA5 chr4:43482082-43483734 (-) // 99.59 // qA5	NCBI 38	30.4081	23.7707	20.9808	36.9483	30.6516	22.0019	222.94	349.513	27.8239	24.6358	23.1084	29.9338	26.4045	22.149	152.701	111.581	24.7525	29.2078	279.143	25.1142	25.9656	130.532	0.0886732	-11.2774	-3.49536	5.29084e-09	5.05822e-07	0.104634	-9.55712	-3.25658	1.23848e-08	9.9389e-07	0.192399	-5.19754	-2.37783	4.83415e-07	1.71944e-05	0.198921	-5.02711	-2.32973	6.08448e-07	2.09798e-05	1.18	1.18
1416529_at	Emp1	epithelial membrane protein 1	NM_010128	chr6:135362923-135383173 (+) // 93.48 // qG1 chr6:135362923-135383173 (+) // 93.48 // q	NCBI 38	6852.26	6189.58	5728.04	6508.82	5955.21	6402.66	1605.73	587.047	8408.63	8178.49	7137.2	6819.83	6984.59	7510.83	971.028	212.672	6239.87	6284.14	970.901	7888.31	7099	454.438	6.42685	6.42685	2.68411	0.000107096	0.000997925	6.47259	6.47259	2.69434	0.000103376	0.000969712	17.3581	17.3581	4.11754	1.35686e-06	3.78688e-05	15.6218	15.6218	3.96549	2.04909e-06	5.38288e-05	1.00712	1.00712
1431305_at	Mcoln1	mucolipin 1	NM_053177	chr8:3500473-3515232 (+) // 97.19 // qA1.1 chr8:3500473-3515232 (+) // 97.19 // qA1.1 c	NCBI 38	77.8068	100.717	220.65	103.373	95.7137	234.188	144.823	309.342	59.1048	103.522	253.922	90.8894	122.216	264.218	63.6748	154.297	120.023	132.327	211.659	115.82	143.175	99.1204	0.567059	-1.76348	-0.818429	0.256286	0.452432	0.625187	-1.59952	-0.67764	0.343393	0.544774	1.16848	1.16848	0.224633	0.749588	0.888085	1.44446	1.44446	0.53053	0.455113	0.687364	1.10251	1.10251
1440163_at	Setd3	SET domain containing 3	NM_028262	chr12:108175889-108176214 (-) // 83.08 // qF1 chr12:108175889-108176214 (-) // 83.08 //	NCBI 38	53.4871	59.442	119.827	46.727	74.0738	84.0538	216.635	253.4	71.5824	83.2425	123.648	82.5556	100.51	107.218	109.648	109.852	72.482	66.2583	234.264	90.3098	96.1683	109.733	0.309402	-3.23204	-1.69245	0.000253897	0.00197806	0.282835	-3.53563	-1.82197	0.000131047	0.00117158	0.822998	-1.21507	-0.281039	0.421904	0.661692	0.876392	-1.14104	-0.190352	0.583763	0.786577	0.914135	-1.09393
1439348_at	S100a10	S100 calcium binding protein A10 (calpactin)	NM_009112	chr3:93555106-93564713 (+) // 99.05 // qF2.1 chr3:93556853-93557451 (+) // 96.82 // qF2	NCBI 38	222.943	233.941	388.172	177.472	182.815	252.052	211.44	239.01	130.232	280.973	324.625	201.142	237.151	400.653	109.888	100.923	272.545	201.47	224.803	228.168	267.362	105.31	1.21238	1.21238	0.277842	0.480472	0.677561	0.896209	-1.11581	-0.158093	0.68609	0.826588	2.16663	2.16663	1.11545	0.0121274	0.051089	2.53881	2.53881	1.34415	0.00386248	0.0211873	0.739217	-1.35278
1457788_at	Rassf1	Ras association (RalGDS/AF-6) domain family member 1	NM_001243748 /// NM_019713	chr9:107561776-107562262 (+) // 98.17 // qF1 chr9:107554602-107562262 (+) // 95.56 // q	NCBI 38	136.983	195.627	331.848	111.467	175.379	219.309	219.667	347.723	94.1112	206.422	311.605	172.554	210.424	292.36	126.806	132.208	207.178	162.453	276.374	182.249	219.776	129.479	0.749627	-1.334	-0.415755	0.399834	0.604513	0.587799	-1.70126	-0.766605	0.132626	0.28031	1.40757	1.40757	0.493207	0.32064	0.560244	1.69739	1.69739	0.763318	0.134152	0.316129	0.784121	-1.27531
1428833_at	4930406D14Rik	RIKEN cDNA 4930406D14 gene	---	chr11:86950128-86951899 (-) // 69.6 // qC chr11:86950128-86951899 (-) // 69.6 // qC	NCBI 38	166.404	154.447	169.794	153.808	129.841	207.468	255.406	362.816	160.35	176.086	144.4	154.601	145.003	146	157.749	129.206	163.413	160.614	304.41	159.754	148.473	142.766	0.536821	-1.86282	-0.897487	0.000558649	0.00371398	0.527622	-1.8953	-0.922423	0.000444724	0.00307206	1.119	1.119	0.16221	0.425662	0.664652	1.03998	1.03998	0.0565558	0.77881	0.900182	0.982864	-1.01743
1444248_at	Rcn2	reticulocalbin 2	NM_001278274 /// NM_011992	chr9:56041844-56059077 (+) // 97.85 // qB chr9:56043769-56045049 (+) // 82.8 // qB chr9	NCBI 38	88.3756	111.061	148.568	72.8453	93.9205	154.998	151.735	369.832	76.5738	109.305	130.37	97.7009	112.695	112.639	102.732	120.386	113.404	101.982	236.901	102.951	107.445	111.215	0.478698	-2.089	-1.06281	0.0151612	0.0531013	0.430485	-2.32296	-1.21597	0.00700612	0.0283266	0.925698	-1.08027	-0.111386	0.773988	0.901843	0.9661	-1.03509	-0.0497556	0.89773	0.956118	0.899283	-1.112
1456916_at	Nsd1	nuclear receptor-binding SET-domain protein 1	NM_008739	chr13:55213207-55314931 (+) // 85.58 // qB1 chr13:55316381-55318326 (+) // 98.26 // qB1	NCBI 38	21.9127	20.6976	33.0832	17.0287	18.0709	20.2559	29.8819	137.171	25.76	22.197	36.387	21.6929	23.3693	32.0455	23.3374	38.782	24.666	18.4036	64.0257	27.5078	25.328	30.0835	0.385252	-2.5957	-1.37613	0.0135775	0.0485844	0.287442	-3.47896	-1.79866	0.00254233	0.0124538	0.914382	-1.09363	-0.129131	0.792431	0.910884	0.841923	-1.18776	-0.24824	0.614741	0.806389	0.746115	-1.34028
1454397_at	4632418H02Rik	RIKEN cDNA 4632418H02 gene	---	chr9:122127319-122130014 (-) // 72.16 // qF4 chr9:122127319-122130014 (+) // 72.16 // q	NCBI 38	25.3007	26.1282	19.586	24.2192	24.0191	25.8547	41.4014	166.297	23.6704	23.3442	20.8491	24.3138	25.035	21.8456	41.598	36.5538	23.4824	24.6848	82.977	22.5854	23.6915	38.9948	0.283	-3.53357	-1.82113	0.000431869	0.00302308	0.29749	-3.36145	-1.74909	0.00060387	0.0039272	0.579192	-1.72654	-0.787886	0.0634429	0.182611	0.607557	-1.64594	-0.718908	0.086915	0.23228	1.0512	1.0512
1419886_at	DXErtd223e	DNA segment, Chr X, ERATO Doi 223, expressed	---	chrX:105873440-105874057 (+) // 21.45 // qD chrX:105873440-105874057 (-) // 21.45 // qD	NCBI 38	69.6159	38.9318	72.4633	55.9743	40.1582	53.5192	205.163	122.003	66.4477	49.7914	54.3249	63.9936	43.7116	44.7711	72.0854	76.7497	58.1267	49.3655	158.21	56.4343	50.0317	74.3809	0.367403	-2.72181	-1.44456	0.000302694	0.00227512	0.312025	-3.20487	-1.68027	7.7053e-05	0.000769353	0.758722	-1.31801	-0.398357	0.200386	0.414359	0.672639	-1.48668	-0.572096	0.0748472	0.208029	0.849272	-1.17748
1457889_at	AU014972	expressed sequence AU014972	---	chr19:7496424-7497150 (+) // 53.51 // qA chr19:7496424-7497150 (+) // 53.51 // qA	NCBI 38	57.48	83.6487	98.6652	58.419	77.7773	100.846	132.394	182.828	65.0271	80.5583	72.8057	77.8192	107.31	100.39	70.0114	76.4309	77.9847	77.092	155.568	72.5156	94.2852	73.1446	0.501293	-1.99484	-0.996274	0.00219124	0.0110508	0.495554	-2.01794	-1.01289	0.00194268	0.0100328	0.991401	-1.00867	-0.0124594	0.962572	0.986883	1.28902	1.28902	0.366275	0.184561	0.393568	0.988552	-1.01158
1454286_at	1110004M10Rik	RIKEN cDNA 1110004M10 gene	---	chr2:92293765-92294828 (-) // 39.85 // qE1 chr2:92293765-92294820 (+) // 39.76 // qE1 c	NCBI 38	58.1698	43.1989	81.7424	57.3037	46.8357	74.0728	151.148	138.657	63.2657	52.1518	60.0604	51.7182	48.2174	63.0604	72.8884	63.61	59.0027	58.3633	144.768	58.3011	53.9761	68.0914	0.407568	-2.45358	-1.29489	0.000157884	0.0013535	0.403151	-2.48046	-1.31061	0.000141501	0.0012467	0.856216	-1.16793	-0.223953	0.378991	0.620584	0.792701	-1.26151	-0.335151	0.196116	0.409417	0.989161	-1.01096
1444268_at	BC004004	cDNA sequence BC004004	NM_030561	chr17:29268823-29301525 (+) // 97.58 // qA3.3 chr17:29268823-29301525 (+) // 97.58 // q	NCBI 38	67.9968	63.7432	97.994	48.8789	61.9628	88.8481	100.86	155.608	62.8738	56.6328	96.5543	69.3564	70.7724	95.2025	51.35	67.7923	75.1692	64.5605	125.278	70.0547	77.5965	59.0011	0.600018	-1.66662	-0.736922	0.0335366	0.099666	0.515336	-1.94048	-0.956415	0.00874161	0.0339057	1.18734	1.18734	0.247733	0.438278	0.675095	1.31517	1.31517	0.395249	0.224354	0.447291	0.858868	-1.16432
1457464_at	C130015C19	uncharacterized LOC403342	---	chr13:55287521-55288340 (+) // 53.56 // qB1 chr13:55287521-55288340 (+) // 53.56 // qB1	NCBI 38	47.7227	66.3293	103.988	44.1675	48.9966	122.232	142.664	228.003	55.4157	57.1806	93.7167	56.9725	57.9111	103.523	62.6517	115.165	69.0457	64.1924	180.354	66.7164	69.9019	84.9428	0.382833	-2.61211	-1.38521	0.0127338	0.0462143	0.355923	-2.80959	-1.49036	0.00836649	0.0327067	0.785426	-1.27319	-0.348453	0.480019	0.711134	0.822925	-1.21518	-0.281167	0.567408	0.774968	0.92971	-1.0756
1429963_at	Mapk6	mitogen-activated protein kinase 6	NM_015806 /// NM_027418	chr9:75386377-75409998 (-) // 98.2 // qD chr9:75386377-75409998 (-) // 98.2 // qD chr9:	NCBI 38	139.002	141.954	224.471	125.158	130.758	228.947	383.922	309.422	101.196	116.313	243.727	137.874	114.567	290.785	186.657	141.216	164.225	155.316	344.665	142.089	166.227	162.363	0.476476	-2.09874	-1.06952	0.0305066	0.0925769	0.450628	-2.21912	-1.14999	0.0216294	0.0696641	0.875132	-1.14268	-0.192427	0.669327	0.841368	1.0238	1.0238	0.0339339	0.939571	0.974683	0.945753	-1.05736
1458469_at	Cblb	Casitas B-lineage lymphoma b	NM_001033238	chr16:52204476-52205387 (+) // 99.35 // qB5 chr16:52207401-52208046 (+) // 96.13 // qB5	NCBI 38	87.6231	65.4502	173.135	76.5525	75.2609	164.728	551.982	397.947	107.728	91.9249	164.11	102.059	89.9352	128.147	283.591	172.037	99.7635	98.2721	468.68	117.57	105.559	220.88	0.212861	-4.6979	-2.23202	0.000191056	0.00157299	0.20968	-4.76918	-2.25374	0.000175174	0.00147563	0.532282	-1.8787	-0.909737	0.0558308	0.16625	0.477903	-2.09248	-1.06521	0.0287793	0.101664	0.985054	-1.01517
1441688_at	6430537I21Rik	RIKEN cDNA 6430537I21 gene	---	chr10:7949954-7950521 (-) // 75.49 // qA1 chr10:7949954-7950521 (-) // 75.49 // qA1	NCBI 38	32.0656	33.2612	69.2713	22.879	33.1079	46.5672	46.4194	80.6962	29.2289	31.1737	76.0278	37.0528	36.9949	43.5547	29.1798	28.5465	41.9608	32.7956	61.2034	41.0699	39.0841	28.8614	0.685594	-1.45859	-0.544574	0.238605	0.43085	0.535846	-1.86621	-0.90011	0.0621399	0.158355	1.42301	1.42301	0.508946	0.269096	0.502127	1.3542	1.3542	0.437441	0.339148	0.579127	0.781579	-1.27946
1438065_at	Rprd1a	regulation of nuclear pre-mRNA domain containing 1A	NM_144861	chr18:24505423-24506100 (-) // 73.49 // qA2 chr18:24505423-24506100 (-) // 73.49 // qA2	NCBI 38	153.726	164.995	236.146	150.089	187.577	256.632	292.359	428.804	149.711	187.083	293.403	184.169	218.047	247.503	113.422	245.98	181.6	193.312	354.05	201.79	214.998	167.027	0.512921	-1.94962	-0.963191	0.0197004	0.0653988	0.546002	-1.83149	-0.873022	0.0314965	0.0935663	1.20812	1.20812	0.272764	0.464423	0.697844	1.2872	1.2872	0.364236	0.33259	0.572743	1.0645	1.0645
1432757_at	2900011L18Rik	RIKEN cDNA 2900011L18 gene	---	chr13:107815463-107816702 (-) // 51.98 // qD2.1 chr13:107815463-107816702 (-) // 51.98	NCBI 38	63.4518	45.5375	118.309	44.7115	48.2271	81.0466	191.064	302.985	51.57	34.5545	97.5177	49.7516	55.2237	94.0074	110.415	116.808	69.9213	55.9094	240.603	55.8049	63.684	113.566	0.29061	-3.44103	-1.78284	0.00226806	0.0113557	0.232373	-4.30343	-2.10549	0.000633667	0.0040798	0.491386	-2.03506	-1.02507	0.048238	0.149084	0.560766	-1.78327	-0.834529	0.0992626	0.255931	0.799604	-1.25062
1438895_at	A430102J17Rik	RIKEN cDNA A430102J17 gene	---	chr18:7895153-7895792 (+) // 36.19 // qA1 chr18:7895153-7895792 (+) // 36.19 // qA1	NCBI 38	96.7377	113.558	217.569	86.0741	89.3257	178.106	381.553	344.505	133.083	102.545	159.523	131.421	117.82	144.28	196.487	149.32	133.701	111.047	362.556	129.604	130.727	171.288	0.368775	-2.71168	-1.43919	0.00139069	0.00766955	0.30629	-3.26487	-1.70703	0.000350915	0.00255227	0.756648	-1.32162	-0.402306	0.277542	0.511793	0.763199	-1.31027	-0.389869	0.291991	0.529904	0.830562	-1.204
1457712_at	Chd8	chromodomain helicase DNA binding protein 8	NM_001010928 /// NM_201637	chr14:52198151-52206094 (-) // 93.7 // qC2 chr14:52231437-52236772 (-) // 97.05 // qC2	NCBI 38	70.6482	76.7864	194.783	45.7711	57.4246	92.7991	117.158	309.234	73.841	85.2141	163.052	95.9828	63.4887	131.085	71.3027	113.489	101.854	62.4803	190.341	100.851	92.7857	89.9561	0.535117	-1.86875	-0.902074	0.119002	0.262695	0.328257	-3.04639	-1.6071	0.0108402	0.0403185	1.12112	1.12112	0.164941	0.764798	0.896228	1.03146	1.03146	0.0446879	0.935334	0.97316	0.613431	-1.63018
1436520_at	Ahnak2 /// LOC101055828	AHNAK nucleoprotein 2 /// protein AHNAK2-like	NM_001033476 /// XM_003085841 /// XM_003945498 /// XM_003945924	chr12:112772192-112773321 (-) // 97.83 // qF1 chr12:112772192-112773321 (-) // 97.83 //	NCBI 38	3886.27	3621.3	3428.75	4170.54	5035.19	4018.3	220.164	281.301	3359.02	3872.98	3260.42	3861.89	5127.96	3480.87	127.603	108.604	3640.7	4386.03	248.862	3487.55	4100.26	117.689	14.6291	14.6291	3.87077	2.06377e-11	8.51709e-09	17.6249	17.6249	4.13954	8.89149e-12	4.66296e-09	29.6329	29.6329	4.88913	1.09218e-12	8.4928e-10	34.839	34.839	5.12263	6.05168e-13	5.68619e-10	1.20479	1.20479
1436491_at	Gm11346	X-linked lymphocyte-regulated 5 pseudogene	NR_024599	chr13:24598009-24598370 (-) // 93.66 // qA3.1 chr13:24598009-24598370 (-) // 93.66 // q	NCBI 38	19.7993	19.4642	16.2849	18.0563	17.8366	17.0926	214.129	116.604	18.6101	16.3298	16.8419	17.352	17.1781	15.1201	129.399	43.2357	18.4455	17.657	158.014	17.2335	16.5181	74.7976	0.116734	-8.56651	-3.0987	7.45816e-07	2.17823e-05	0.111743	-8.94908	-3.16174	5.95167e-07	1.88307e-05	0.230403	-4.34023	-2.11777	4.08897e-05	0.000542562	0.220838	-4.52821	-2.17894	3.0917e-05	0.000448645	0.957251	-1.04466
1442731_at	Pds5a	PDS5, regulator of cohesion maintenance, homolog A (S. cerevisiae)	NM_001081321 /// NM_027818	chr5:65622742-65648005 (-) // 96.73 // qC3.1 chr5:65663300-65663907 (-) // 53.56 // qC3	NCBI 38	45.8791	38.6006	53.6366	36.0089	37.345	61.8807	69.7476	90.6112	48.4266	43.5032	65.6746	50.0188	40.374	60.0924	28.6906	49.3812	45.6271	43.6582	79.4976	51.7211	49.509	37.6401	0.573942	-1.74234	-0.801023	0.01864	0.0625926	0.549175	-1.82091	-0.864662	0.0124024	0.0449393	1.3741	1.3741	0.458487	0.147663	0.336418	1.31533	1.31533	0.395425	0.207048	0.423937	0.956847	-1.0451
1416221_at	Fstl1	follistatin-like 1	NM_008047	chr16:37777038-37836520 (+) // 94.13 // qB3 chr16:37777038-37836520 (+) // 94.13 // qB3	NCBI 38	13788.1	14733.6	14927.9	13648.4	14673.6	13778.1	1988.16	922.998	13677.8	15398.3	12912.4	13572.3	14573.8	13383.9	1083.73	379.751	14474.2	14025.8	1354.65	13958	13832.7	641.511	10.6849	10.6849	3.4175	3.14883e-07	1.1316e-05	10.3539	10.3539	3.3721	3.66587e-07	1.29572e-05	21.7577	21.7577	4.44345	1.46658e-08	1.15435e-06	21.5634	21.5634	4.43051	1.51854e-08	1.22518e-06	0.969018	-1.03197
1439881_at	C030013E06Rik	RIKEN cDNA C030013E06 gene	---	chr11:102319784-102320256 (-) // 96.41 // qD chr11:102319784-102320256 (-) // 96.41 //	NCBI 38	24.4179	33.587	43.483	23.1481	36.2799	53.3643	146.573	116.702	20.2522	38.0618	34.5452	30.7171	40.4037	52.9726	80.1134	47.991	32.9154	35.5203	130.787	29.8618	40.3599	62.0057	0.251671	-3.97345	-1.99039	0.000204018	0.00166091	0.271588	-3.68205	-1.88051	0.000335161	0.0024583	0.481597	-2.07643	-1.0541	0.017953	0.0695824	0.650906	-1.53632	-0.619479	0.135344	0.318139	1.07914	1.07914
1430808_at	Tbc1d5	TBC1 domain family, member 5	NM_028162	chr17:50916723-51179335 (-) // 72.19 // qC chr17:50916723-51179335 (-) // 72.19 // qC c	NCBI 38	44.9526	43.046	79.1151	47.0995	40.928	50.704	147.644	126.088	52.895	52.6912	65.2526	43.9474	50.0022	72.7911	76.0483	55.121	53.4953	46.0638	136.442	56.6565	54.2834	64.7447	0.392076	-2.55053	-1.35079	0.000276323	0.00211479	0.337609	-2.96201	-1.56657	7.17387e-05	0.000726583	0.875079	-1.14275	-0.192515	0.493419	0.721632	0.838424	-1.19271	-0.254248	0.369009	0.610024	0.861081	-1.16133
1416321_s_at	Prelp	proline arginine-rich end leucine-rich repeat	NM_054077	chr1:133910277-133921401 (-) // 96.21 // qE4 chr1:133910277-133921401 (-) // 96.21 // q	NCBI 38	4703.11	4953.56	1047.08	5165.17	5269.63	1684.25	2452.63	2682.72	3537.73	9660.92	1840.18	4678.71	9625.53	2505.31	1267.73	1169.8	2900.13	3578.9	2565.1	3976.82	4832.32	1217.75	1.13061	1.13061	0.177101	0.829038	0.91402	1.39524	1.39524	0.480513	0.560344	0.735773	3.26561	3.26561	1.70735	0.0536526	0.16132	3.96801	3.96801	1.98842	0.0281209	0.0999041	1.23405	1.23405
1436882_at	Ubl5	ubiquitin-like 5	NM_025401	chr9:20644549-20646790 (+) // 92.31 // qA3 chr9:20646389-20646791 (+) // 94.78 // qA3 c	NCBI 38	51.0144	72.9731	99.4949	51.0093	64.1261	121.345	96.2025	141.606	42.9491	61.3279	112.525	71.5473	76.0668	134.187	48.7694	63.1171	71.8153	73.4912	116.717	66.6734	90.0535	55.4813	0.615297	-1.62523	-0.700645	0.145687	0.304619	0.629653	-1.58818	-0.667371	0.164212	0.327645	1.20173	1.20173	0.265113	0.567993	0.775146	1.62312	1.62312	0.69877	0.14668	0.337228	1.02333	1.02333
1436767_at	Luc7l2	LUC7-like 2 (S. cerevisiae)	NM_001170848 /// NM_001170849 /// NM_138680	chr6:38551521-38609470 (+) // 96.51 // qB1 chr6:38592684-38603876 (+) // 84.6 // qB1 ch	NCBI 38	230.478	408.643	654.349	187.812	414.19	281.692	550.659	1027.16	224.694	389.057	573.952	330.712	434.597	413.616	272.495	469.382	394.987	279.821	752.048	368.819	390.27	357.622	0.525215	-1.90398	-0.92902	0.078791	0.192022	0.372078	-2.68761	-1.42632	0.0118034	0.0431466	1.03131	1.03131	0.0444781	0.928602	0.972937	1.09129	1.09129	0.126035	0.799738	0.911338	0.70843	-1.41157
1437551_at	Fam63a	family with sequence similarity 63, member A	NM_133858 /// NM_199475	chr3:95287996-95296166 (+) // 92.94 // qF2.1 chr3:95287996-95296166 (+) // 92.94 // qF2	NCBI 38	82.3732	57.6362	113.526	76.7733	72.3149	92.7991	106.215	167.358	67.2491	63.5368	77.0814	76.1409	76.9918	90.8847	50.47	79.7824	81.3816	80.1583	133.327	69.0591	81.0685	63.4571	0.610392	-1.63829	-0.712192	0.0243854	0.0774839	0.601219	-1.66329	-0.734037	0.0210584	0.0682149	1.08828	1.08828	0.12205	0.669329	0.841368	1.27753	1.27753	0.353357	0.228288	0.452552	0.984972	-1.01526
1457404_at	Nfkbiz	nuclear factor of kappa light polypeptide gene enhancer in B cells inhibitor, zeta	NM_001159394 /// NM_001159395 /// NM_030612	chr16:55811374-55838899 (-) // 99.11 // qC1.1 chr16:55811374-55838899 (-) // 99.11 // q	NCBI 38	991.491	1096.97	1345.65	1191.66	920.389	1693.05	1059.13	1419.41	565.963	1150.57	1279.73	1530.74	906.256	1422.47	372.78	916.547	1135.33	1229.11	1226.13	941.045	1254.24	584.529	0.925967	-1.07995	-0.110967	0.795686	0.895074	1.00245	1.00245	0.00353028	0.993378	0.996826	1.60992	1.60992	0.686989	0.12579	0.301352	2.1458	2.1458	1.10152	0.0211322	0.0803476	1.08259	1.08259
1457656_s_at	C230085N15Rik	RIKEN cDNA C230085N15 gene	---	chr17:51757293-51758256 (-) // 98.05 // qC chr17:51759945-51760790 (-) // 99.76 // qC c	NCBI 38	13.8	12.704	10.7943	14.7806	11.3417	11.9827	102.016	59.6626	13.173	11.3263	12.4028	13.1608	11.4375	13.7589	96.8692	14.2965	12.3691	12.6176	78.0161	12.2771	12.7468	37.2142	0.158545	-6.30735	-2.65704	0.000278207	0.00212668	0.161729	-6.18317	-2.62835	0.000305677	0.0022844	0.329905	-3.03117	-1.59988	0.0108377	0.0467297	0.342524	-2.9195	-1.54572	0.0131392	0.0554239	1.02008	1.02008
1424832_at	Cd300ld	CD300 molecule-like family member d	NM_145437	chr11:114982272-114989922 (-) // 74.35 // qE2 chr11:114982272-114989922 (-) // 74.35 //	NCBI 38	1078.03	1027.59	1577.06	1185.83	859.079	1659.65	574.192	1959.04	1291.17	701.173	583.327	1187.24	668.567	394.415	715.206	360.318	1204.4	1191.28	1060.55	808.302	679.001	507.643	1.13561	1.13561	0.183467	0.749129	0.867808	1.12326	1.12326	0.167692	0.769963	0.8799	1.59227	1.59227	0.671085	0.253529	0.483286	1.33755	1.33755	0.419593	0.468235	0.697743	0.989127	-1.01099
1447016_at	LOC100862515 /// LOC101056336 /// Tbc1d1	TBC1 domain family member 1-like /// uncharacterized LOC101056336 /// TBC1 domain famil	NM_019636 /// XM_003689370 /// XM_003946168	chr5:64173702-64174260 (+) // 99.28 // qC3.1 chr5:64173702-64174260 (+) // 99.28 // qC3	NCBI 38	35.7177	28.0625	39.2653	24.2056	24.4862	39.0704	148.142	84.2114	36.5985	39.6109	38.0292	35.0743	30.5665	34.1575	79.3033	36.0991	34.0153	28.5034	111.693	38.0596	33.2078	53.5049	0.304543	-3.28361	-1.71528	0.000134997	0.00119336	0.255194	-3.91859	-1.97033	3.62779e-05	0.000427869	0.71133	-1.40582	-0.491409	0.148904	0.338392	0.620649	-1.61122	-0.68815	0.051164	0.156955	0.837958	-1.19338
1441602_at	Mettl23	methyltransferase like 23	NM_028865	chr11:116848123-116848757 (-) // 78.82 // qE2 chr11:116848123-116848757 (-) // 78.82 //	NCBI 38	18.16	21.6052	22.0077	20.4153	20.5216	25.3561	31.9374	85.3984	19.8271	20.4743	21.2898	19.4136	19.8581	13.3278	20.2274	30.9629	20.5155	21.9828	52.2247	20.5217	17.2558	25.0259	0.392833	-2.54561	-1.34801	0.00125752	0.00708818	0.420928	-2.3757	-1.24835	0.00222276	0.0111549	0.820016	-1.21949	-0.286276	0.398721	0.640407	0.689513	-1.4503	-0.53635	0.126195	0.303333	1.07152	1.07152
1428734_at	Anapc15	anaphase prompoting complex C subunit 15	NM_027532	chr7:101897731-101899545 (+) // 70.2 // qE2 chr7:101897731-101899545 (+) // 70.2 // qE2	NCBI 38	222.083	210.206	303.531	200.146	212.974	308.339	499.573	1438.65	185.014	241.714	381.292	195.572	240.704	338.837	328.095	503.436	241.986	235.996	847.823	257.39	251.729	406.421	0.285419	-3.50362	-1.80885	0.000928187	0.00555496	0.278356	-3.59252	-1.845	0.000793235	0.00486744	0.633306	-1.57902	-0.659025	0.143658	0.330467	0.619378	-1.61452	-0.691108	0.126672	0.304111	0.975253	-1.02537
1436487_x_at	Fbxw2	F-box and WD-40 domain protein 2	NM_001164768 /// NM_001164769 /// NM_001164770 /// NM_001164772 /// NM_013890	chr2:34805002-34823181 (-) // 98.92 // qB chr2:34811163-34826311 (-) // 85.86 // qB chr	NCBI 38	23.1693	32.6134	48.2593	26.0005	32.7284	50.4585	60.0101	110.479	17.7376	34.2429	58.3441	28.7704	37.1699	47.0477	44.8943	33.9812	33.1611	35.0172	81.4239	32.8463	36.9169	39.0584	0.407265	-2.4554	-1.29596	0.0160215	0.0554342	0.430059	-2.32527	-1.21739	0.0220366	0.0706928	0.840955	-1.18912	-0.249899	0.602198	0.799694	0.94517	-1.05801	-0.0813543	0.864602	0.941574	1.05597	1.05597
1424893_at	Ndel1	nuclear distribution gene E-like homolog 1 (A. nidulans)	NM_023668	chr11:68821433-68853118 (-) // 97.09 // qB3 chr11:68828956-68845425 (-) // 75.01 // qB3	NCBI 38	72.7371	109.176	168.092	54.0484	86.7429	97.2982	182.473	344.035	69.8309	123.802	171.023	89.675	128.204	126.887	113.709	127.172	110.104	76.9762	250.547	113.923	113.413	120.252	0.439455	-2.27555	-1.18621	0.0146711	0.0517425	0.307233	-3.25486	-1.70259	0.00142347	0.00781498	0.947362	-1.05556	-0.0780123	0.855893	0.941871	0.943127	-1.0603	-0.084476	0.844118	0.931891	0.699124	-1.43036
1418511_at	Dpt	dermatopontin	NM_019759	chr1:164796643-164824274 (+) // 97.79 // qH2.2 chr1:164796643-164824274 (+) // 97.79 //	NCBI 38	153.778	288.935	92.6564	144.948	399.629	235.651	2878.09	386.069	98.5099	163.318	64.4874	97.2673	213.9	94.1845	1393.63	184.04	160.271	238.992	1054.1	101.23	125.137	506.441	0.152042	-6.57713	-2.71746	0.0107578	0.0403314	0.226721	-4.41071	-2.14101	0.0355768	0.102859	0.199884	-5.0029	-2.32277	0.0245043	0.088548	0.24709	-4.0471	-2.01689	0.0457341	0.144254	1.49117	1.49117
1432850_at	5430434G16Rik	RIKEN cDNA 5430434G16 gene	---	chr15:36251312-36252757 (-) // 65.35 // qB3.1 chr15:36251312-36252757 (-) // 65.35 // q	NCBI 38	111.377	141.181	271.545	107.311	121.667	207.832	267.3	470.422	106.61	155.868	246.463	135.751	172.759	247.485	124.524	233.095	162.233	139.48	354.605	159.994	179.713	170.37	0.457503	-2.18578	-1.12815	0.0319778	0.0961224	0.393338	-2.54234	-1.34616	0.013276	0.0473718	0.939095	-1.06486	-0.090657	0.849768	0.939342	1.05484	1.05484	0.0770242	0.872129	0.944617	0.85975	-1.16313
1443942_at	Gabpb2	GA repeat binding protein, beta 2	NM_029885 /// NM_172512	chr3:95186687-95187264 (-) // 60.79 // qF2.1 chr3:95187371-95188492 (-) // 37.38 // qF2	NCBI 38	39.134	38.8875	43.3155	35.1427	29.8347	31.9177	64.368	134.681	41.2704	36.0354	43.3141	39.4748	48.9438	44.8447	40.2806	49.7709	40.3957	32.2253	93.1078	40.0867	44.2495	44.775	0.433859	-2.3049	-1.2047	0.000236152	0.00187018	0.346105	-2.88929	-1.53072	2.47722e-05	0.000319306	0.895288	-1.11696	-0.159576	0.516534	0.738648	0.988265	-1.01187	-0.0170301	0.944344	0.976694	0.797738	-1.25354
1439895_at	AU021025	expressed sequence AU021025	---	chr13:113986068-113987200 (+) // 77.87 // qD2.2 chr13:113986068-113987200 (+) // 77.87	NCBI 38	79.9585	67.8208	87.0061	79.691	76.7202	93.3685	292.512	400.931	99.2089	68.5357	74.3358	85.8402	75.5248	97.3043	133.528	204.234	77.8503	82.9546	342.457	79.6565	85.764	165.139	0.227328	-4.39893	-2.13715	3.21599e-07	1.15023e-05	0.242233	-4.12825	-2.04553	5.28172e-07	1.69908e-05	0.482361	-2.07314	-1.05181	0.000413928	0.00343789	0.519343	-1.92551	-0.94524	0.000987872	0.00712978	1.06557	1.06557
1444197_at	Rinl	Ras and Rab interactor-like	NM_177158	chr7:28788971-28789626 (+) // 81.96 // qB1 chr7:28789523-28790157 (+) // 44.9 // qB1 ch	NCBI 38	63.5652	53.8844	48.0455	60.6512	53.8844	52.073	408.032	555.195	72.5791	59.8664	53.9389	64.9215	60.8342	44.934	267.351	197.797	54.7998	55.4164	475.958	61.6543	56.1958	229.959	0.115135	-8.68544	-3.1186	2.08752e-09	2.63006e-07	0.116431	-8.58878	-3.10245	2.22368e-09	2.81256e-07	0.268109	-3.72982	-1.89911	7.08866e-07	2.28198e-05	0.244374	-4.09209	-2.03284	3.28886e-07	1.31906e-05	1.01125	1.01125
1453399_at	Ccnt2	cyclin T2	NM_028399	chr1:127774208-127806889 (+) // 98.45 // qE3 chr1:127774208-127806889 (+) // 98.45 // q	NCBI 38	776.788	925.671	1301.1	838.999	1047.88	1524.29	1130.95	1378.12	601.357	1081.36	1513.04	1197.49	1250.96	1324.46	404.876	900.609	978.033	1102.53	1248.43	994.605	1256.59	603.839	0.783401	-1.27649	-0.352177	0.391141	0.596423	0.883097	-1.13238	-0.179356	0.65885	0.807958	1.64713	1.64713	0.719954	0.0930368	0.242183	2.08095	2.08095	1.05724	0.0196336	0.0759168	1.12726	1.12726
1437717_x_at	2610005L07Rik /// LOC101056086	cadherin 11 pseudogene /// uncharacterized LOC101056086	NM_001024708 /// NM_001033456 /// NR_028428 /// XM_003945428	chr8:20122306-20151967 (+) // 78.36 // qA1.3 /// chr8:20550246-20583096 (+) // 84.03 //	NCBI 38	587.359	716.492	1022.03	548.01	780.258	995.028	1312.72	1458.22	559.241	770.321	1053.2	791.793	920.923	911.159	810.983	552.523	754.842	752.131	1383.59	768.414	872.596	669.398	0.545582	-1.83291	-0.874132	0.0138302	0.0493128	0.543621	-1.83952	-0.879327	0.0133884	0.0476734	1.14791	1.14791	0.19901	0.528055	0.746972	1.30355	1.30355	0.382446	0.23491	0.46114	0.996405	-1.00361
1439626_at	Tmod3	tropomodulin 3	NM_016963	chr9:75497716-75559657 (-) // 89.3 // qD chr9:75497716-75559657 (-) // 89.3 // qD chr9:	NCBI 38	16.7567	14.3722	26.3502	15.4426	13.64	31.196	38.9385	59.0747	17.0027	14.0898	22.3813	18.6226	14.254	22.3813	24.0167	22.4962	18.5139	18.7303	47.9613	17.5026	18.1116	23.2441	0.386018	-2.59055	-1.37326	0.00221704	0.0111497	0.390531	-2.56062	-1.35649	0.00242056	0.0119517	0.752995	-1.32803	-0.409288	0.277136	0.511379	0.77919	-1.28338	-0.359953	0.336649	0.576797	1.01169	1.01169
1440183_x_at	Apopt1	apoptogenic, mitochondrial 1	NM_001163388 /// NM_026511	chr12:111713268-111734214 (+) // 79.05 // qF1 chr13:55688767-55689265 (+) // 17.14 // q	NCBI 38	21.9981	23.3127	26.9888	24.1894	19.0355	28.6215	27.144	115.579	19.2652	25.6394	27.9206	26.9215	23.9446	24.0834	25.2164	29.2613	24.0064	23.6186	55.9998	23.9778	24.9429	27.16	0.428687	-2.3327	-1.222	0.0125818	0.0457587	0.421762	-2.371	-1.2455	0.0113074	0.0417019	0.882837	-1.13271	-0.179781	0.676931	0.846017	0.918374	-1.08888	-0.122846	0.775467	0.898459	0.983846	-1.01642
1441549_at	Pi4kb	phosphatidylinositol 4-kinase, catalytic, beta polypeptide	NM_175356	chr3:95005821-95006622 (+) // 96.39 // qF2.1 chr3:94979233-94979899 (+) // 67.57 // qF2	NCBI 38	53.0195	69.5062	73.31	56.481	58.0307	73.6113	79.1058	118.018	55.5984	61.9258	98.077	59.4142	65.7538	94.4861	48.7774	45.167	64.6586	62.2663	96.6414	69.6408	71.7437	46.9466	0.669056	-1.49464	-0.579801	0.0538723	0.144119	0.644302	-1.55207	-0.634191	0.0373933	0.106861	1.48339	1.48339	0.568898	0.0578326	0.170553	1.52819	1.52819	0.611824	0.0434628	0.138884	0.963002	-1.03842
1440250_at	Col4a4	collagen, type IV, alpha 4	NM_007735	chr1:82452557-82586817 (-) // 98.03 // qC5 chr1:82451030-82451597 (-) // 66.31 // qC5 c	NCBI 38	46.0216	22.3232	68.9141	34.2308	23.2937	74.6507	94.9047	132.705	40.5385	31.2983	110.865	38.8742	33.424	202.507	58.4424	50.8792	41.3691	39.0448	112.224	52.0069	64.0795	54.5297	0.368627	-2.71277	-1.43977	0.0840158	0.201875	0.347917	-2.87425	-1.52318	0.0693624	0.172084	0.953734	-1.04851	-0.0683411	0.930534	0.973834	1.17513	1.17513	0.23282	0.766854	0.893807	0.943817	-1.05953
1421786_at	Ppp3r1	protein phosphatase 3, regulatory subunit B, alpha isoform (calcineurin B, type I)	NM_024459	chr11:17192843-17195083 (+) // 78.8 // qA2 chr11:17192843-17195083 (+) // 78.8 // qA2 c	NCBI 38	101.665	149.199	163.168	120.536	136.644	189.141	129.172	163.712	112.618	138.454	236.456	138.146	121.203	244.858	45.0922	110.9	135.264	146.045	145.421	154.481	160.046	70.7158	0.930158	-1.07509	-0.104452	0.807566	0.901652	1.0043	1.0043	0.00619029	0.988412	0.994853	2.18455	2.18455	1.12734	0.0189015	0.0725046	2.26323	2.26323	1.17838	0.0150001	0.0615634	1.07971	1.07971
1439949_at	Gsk3b	glycogen synthase kinase 3 beta	NM_019827	chr16:38244396-38246079 (+) // 97.98 // qB3 chr16:38243044-38244240 (+) // 81.16 // qB3	NCBI 38	83.1491	99.8603	158.739	61.0205	68.4624	87.2995	157.33	212.514	86.8312	98.6008	111.314	103.219	91.3741	104.851	77.157	102.543	109.642	71.4464	182.852	98.4091	99.6287	88.9492	0.599623	-1.66771	-0.737872	0.0128137	0.0464485	0.390733	-2.55929	-1.35574	0.000147706	0.00128828	1.10635	1.10635	0.145808	0.577989	0.78289	1.12007	1.12007	0.163589	0.533196	0.749505	0.651631	-1.53461
1449071_at	Myl7	myosin, light polypeptide 7, regulatory	NM_022879	chr11:5896635-5898782 (-) // 100.0 // qA1 chr11:5896635-5898782 (-) // 100.0 // qA1	NCBI 38	145.261	120.101	141.603	127.22	94.1256	121.117	373.985	187.426	152.432	198.004	182.693	125.129	160.594	199.96	256.235	64.8223	135.191	113.194	264.754	176.698	159.007	128.879	0.510628	-1.95837	-0.969655	0.0486687	0.133192	0.427543	-2.33895	-1.22586	0.0165931	0.0565726	1.37104	1.37104	0.455271	0.325711	0.565911	1.23377	1.23377	0.303073	0.508532	0.730545	0.837288	-1.19433
1440378_at	Sec11c	SEC11 homolog C (S. cerevisiae)	NM_025468	chr18:65803892-65804564 (+) // 35.89 // qE1 chr18:65803892-65804564 (+) // 35.89 // qE1	NCBI 38	54.0555	48.5351	68.2969	52.336	55.5576	59.0105	143.015	140.097	44.3786	58.4286	77.6791	66.1895	54.5508	88.9257	74.8087	63.5184	56.3764	55.5679	141.548	58.6183	68.4762	68.9329	0.398286	-2.51076	-1.32812	0.000100024	0.000944952	0.392573	-2.5473	-1.34897	8.64858e-05	0.000842097	0.850371	-1.17596	-0.233836	0.347621	0.588649	0.993374	-1.00667	-0.00959111	0.96872	0.986833	0.985657	-1.01455
1438781_at	Tet2	tet methylcytosine dioxygenase 2	NM_001040400 /// NM_145989	chr3:133479053-133479792 (-) // 71.89 // qG3 chr3:133479053-133479792 (-) // 71.89 // q	NCBI 38	119.667	172.313	291.497	100.69	156.978	219.303	326.558	516.31	103.26	165.458	308.816	165.602	162.69	234.575	178.605	223.914	181.82	151.323	410.614	174.09	184.886	199.98	0.442799	-2.25836	-1.17528	0.0250348	0.0791458	0.368528	-2.7135	-1.44015	0.00843779	0.0329369	0.870535	-1.14872	-0.200026	0.673216	0.843963	0.924518	-1.08165	-0.113227	0.810865	0.916811	0.832269	-1.20153
1440400_at	Rnf157	ring finger protein 157	NM_027258	chr11:116336342-116337898 (-) // 89.87 // qE2 chr11:116337420-116350148 (-) // 93.01 //	NCBI 38	62.6598	59.1145	70.2461	64.3997	51.7151	80.2459	182.281	239.404	59.8166	57.2257	68.8428	61.0391	55.8819	62.3292	123.375	83.9209	63.8414	64.413	208.899	61.7672	59.6839	101.753	0.305608	-3.27216	-1.71025	1.6343e-06	3.96071e-05	0.308346	-3.24311	-1.69738	1.77516e-06	4.26312e-05	0.607026	-1.64738	-0.72017	0.00404659	0.0214233	0.586553	-1.70487	-0.769667	0.00256476	0.015232	1.00896	1.00896
1438675_at	Sfswap	splicing factor, suppressor of white-apricot homolog (Drosophila)	NM_001035259 /// NM_172276	chr5:129501230-129516132 (+) // 80.8 // qG1.3 chr5:129514786-129571383 (+) // 97.36 //	NCBI 38	59.6505	106.05	136.564	37.4248	100.901	99.4044	100.018	239.13	53.9393	100.304	137.715	76.8765	107.181	109.377	56.6406	100.188	95.2403	72.1356	154.651	90.6572	96.5939	75.332	0.61584	-1.6238	-0.699373	0.216838	0.403789	0.46644	-2.1439	-1.10024	0.0620987	0.158295	1.20343	1.20343	0.267152	0.628156	0.816131	1.28224	1.28224	0.358666	0.517137	0.737499	0.757405	-1.3203
1437771_at	Lrrn4cl	LRRN4 C-terminal like	NM_001013019	chr19:8853184-8853909 (+) // 72.73 // qA chr19:8853184-8853909 (+) // 72.73 // qA	NCBI 38	683.316	1184.58	554.306	1068.11	1556.53	739.744	278.896	227.954	578.756	876.675	429.826	807.426	1279.09	397.34	176.586	85.5948	765.554	1071.41	252.14	601.921	743.099	122.942	3.03622	3.03622	1.60228	0.00736399	0.0296459	4.24919	4.24919	2.08719	0.00119122	0.00676302	4.89599	4.89599	2.2916	0.000566054	0.00440394	6.04435	6.04435	2.59559	0.000194309	0.00193755	1.3995	1.3995
1437660_at	Nktr	natural killer tumor recognition sequence	NM_010918	chr9:121719178-121756929 (+) // 95.7 // qF4 chr9:121719178-121756929 (+) // 95.7 // qF4	NCBI 38	275.075	315.547	562.084	247.832	247.107	447.766	433.511	515.897	289.378	289.485	420.368	360.573	303.721	434.335	232.25	229.221	365.402	301.547	472.906	327.772	362.325	230.731	0.772678	-1.2942	-0.372061	0.266673	0.464748	0.637648	-1.56826	-0.649168	0.0640543	0.16218	1.42059	1.42059	0.50649	0.138246	0.322008	1.57034	1.57034	0.651077	0.0633721	0.184373	0.825244	-1.21176
1432352_at	Ccny	cyclin Y	NM_026484	chr18:9315285-9450170 (-) // 95.52 // qA1 chr18:9315285-9450170 (-) // 95.52 // qA1 chr	NCBI 38	43.1275	74.709	136.517	39.7897	63.871	87.9253	240.321	312.766	50.2157	68.3467	95.6206	50.0724	67.6963	97.8135	124.187	144.11	76.0507	60.6826	274.161	68.9768	69.2129	133.778	0.277395	-3.60496	-1.84999	0.00134441	0.00746818	0.221339	-4.51796	-2.17567	0.000363271	0.00262689	0.515604	-1.93947	-0.955665	0.0555647	0.165628	0.51737	-1.93285	-0.950732	0.0566673	0.16948	0.797918	-1.25326
1452792_at	Dzip1	DAZ interacting protein 1	NM_025943	chr14:118878881-118883740 (-) // 78.95 // qE4 chr14:118875519-118912506 (-) // 95.27 //	NCBI 38	869.582	996.28	1019.69	935	940.071	1046.48	128.265	217.29	764.766	1062.91	781.69	882.61	1059.44	867.163	87.7904	76.0193	959.554	972.537	166.954	859.718	932.513	81.6879	5.74739	5.74739	2.52291	2.52163e-08	1.67988e-06	5.82518	5.82518	2.5423	2.30228e-08	1.57804e-06	10.5244	10.5244	3.39567	6.95145e-10	1.18308e-07	11.4156	11.4156	3.51293	4.57843e-10	8.42823e-08	1.01353	1.01353
1428867_at	Exoc3l2	exocyst complex component 3-like 2	NM_028954 /// XM_001471750 /// XM_001471751	chr7:19489055-19496762 (+) // 90.85 // qA3 chr7:19489055-19496762 (+) // 90.85 // qA3 c	NCBI 38	24.1896	36.1064	232.3	27.4317	34.9698	207.45	5218.89	7435.87	34.422	34.2951	251.304	31.1217	40.91	281.258	4189.79	2217.47	58.7603	58.3827	6229.5	66.6938	71.0115	3048.11	0.00943276	-106.013	-6.7281	0.000111739	0.00102973	0.00937211	-106.7	-6.73741	0.00011032	0.00102209	0.0218808	-45.7021	-5.51419	0.000632246	0.00482323	0.0232974	-42.9233	-5.42369	0.000723047	0.00554689	0.99357	-1.00647
1435990_at	Adamts2	a disintegrin-like and metallopeptidase (reprolysin type) with thrombospondin type 1 mo	NM_001277305 /// NM_175643	chr11:50806531-50807573 (+) // 96.04 // qB1.3 chr11:50806531-50807573 (+) // 96.04 // q	NCBI 38	1656.58	2666.08	1109.48	1979.87	3618.01	1801.62	322.046	65.5987	1370.35	2780.77	813.033	1640.61	3824.9	689.404	74.6581	67.8201	1698.56	2345.7	145.349	1457.82	1629.37	71.1578	11.6858	11.6858	3.54668	0.0004362	0.00304631	16.1379	16.1379	4.01238	0.000148172	0.00129101	20.4872	20.4872	4.35665	6.89602e-05	0.000820722	22.8987	22.8987	4.51719	4.87504e-05	0.000645724	1.38098	1.38098
1453131_at	Cd300lg	CD300 antigen like family member G	NM_001160711 /// NM_001160712 /// NM_001160713 /// NM_027987	chr11:102041523-102055620 (+) // 94.54 // qD chr11:102041523-102055620 (+) // 94.54 //	NCBI 38	50.2101	44.6472	42.4733	48.2076	49.4357	41.0245	961.162	1102.05	49.3611	43.4599	37.2328	47.0824	45.3246	35.8716	1068.14	238.422	45.6648	46.0679	1029.19	43.0631	42.4573	504.647	0.0443698	-22.5378	-4.49428	9.57184e-08	4.60234e-06	0.0447617	-22.3405	-4.48159	9.89286e-08	4.77706e-06	0.0853331	-11.7188	-3.55075	1.38536e-06	3.84974e-05	0.0841329	-11.886	-3.57119	1.30048e-06	3.78651e-05	1.00883	1.00883
1442295_at	Arpc2	actin related protein 2/3 complex, subunit 2	NM_029711	chr1:74236532-74268202 (+) // 88.47 // qC3 chr1:74246392-74247007 (+) // 44.72 // qC3 c	NCBI 38	48.2373	90.006	140.495	46.5467	60.6827	96.0483	79.7237	201.311	50.9205	66.6695	150.475	60.3935	56.6031	129.379	50.6027	76.3912	84.8081	64.7362	126.686	79.9397	76.19	62.174	0.669439	-1.49379	-0.578975	0.335872	0.541296	0.511	-1.95695	-0.968605	0.11856	0.257883	1.28574	1.28574	0.362599	0.54219	0.75681	1.22543	1.22543	0.293288	0.621111	0.810507	0.763325	-1.31006
1460332_at	Pln	phospholamban	NM_001141927 /// NM_023129	chr10:53337685-53346001 (+) // 87.79 // qB3 chr10:53337685-53346001 (+) // 87.79 // qB3	NCBI 38	25.6593	18.6711	23.0764	19.3808	20.0119	18.5251	103.139	106.132	23.3462	21.0983	18.8958	21.0712	21.3364	16.2912	92.6883	28.4498	22.2768	19.2963	104.623	21.035	19.4203	51.3513	0.212926	-4.69647	-2.23158	2.31009e-05	0.000301555	0.184437	-5.4219	-2.4388	9.33815e-06	0.000149342	0.409629	-2.44123	-1.28761	0.00262842	0.0151599	0.378183	-2.64422	-1.40284	0.00140577	0.00940817	0.866204	-1.15446
1425358_at	Riok1	RIO kinase 1 (yeast)	NM_024242	chr13:38043114-38061429 (+) // 94.4 // qA3.3 chr13:38037248-38045131 (+) // 87.18 // qA	NCBI 38	125.089	141.97	213.811	118.11	130.7	241.797	203.079	320.672	114.735	166.109	205.61	153.385	160.547	228.344	111.221	141.17	156.007	155.121	255.189	157.656	177.824	125.303	0.611338	-1.63576	-0.709958	0.0661394	0.168129	0.607867	-1.6451	-0.718172	0.063439	0.161011	1.25819	1.25819	0.33135	0.365934	0.607725	1.41915	1.41915	0.505027	0.177024	0.38296	0.994321	-1.00571
1455132_at	Rasal3	RAS protein activator like 3	NM_178785	chr17:32390228-32392640 (-) // 99.46 // qB1 chr17:32390228-32392640 (-) // 99.46 // qB1	NCBI 38	161.203	148.552	307.423	202.085	134.96	333.313	1305.83	1592.31	196.262	130.228	410.528	258.985	134.412	369.078	914.515	548.639	194.534	208.703	1441.94	218.925	234.212	708.336	0.134908	-7.41243	-2.88995	0.000132918	0.00117821	0.144735	-6.90919	-2.78851	0.000183665	0.00153569	0.309069	-3.23552	-1.694	0.00781087	0.0362575	0.330652	-3.02433	-1.59661	0.0110443	0.048405	1.07284	1.07284
1436540_at	mmu-let-7d	mmu-let-7d	---	chr13:48535525-48536214 (-) // 96.16 // qA5 chr13:48535525-48536214 (-) // 96.16 // qA5	NCBI 38	323.508	513.672	482.757	433.388	572.779	565.635	455.612	763.284	220.142	510.086	659.289	456.547	650.422	572.821	251.154	335.059	431.292	519.767	589.726	419.891	554.076	290.099	0.731345	-1.36734	-0.451376	0.270714	0.469722	0.881372	-1.13459	-0.182177	0.650032	0.801715	1.44741	1.44741	0.533474	0.19706	0.409756	1.90996	1.90996	0.933542	0.0334714	0.114164	1.20514	1.20514
1419083_at	Tnfsf11	tumor necrosis factor (ligand) superfamily, member 11	NM_011613	chr14:78277445-78308027 (-) // 95.31 // qD3 chr14:78277445-78308027 (-) // 95.31 // qD3	NCBI 38	18.7139	24.2431	18.918	18.7489	15.3698	18.2425	50.207	130.139	22.1072	18.8171	14.4079	19.5382	20.1888	16.3007	46.6179	33.9222	20.4743	17.3878	80.8329	18.1648	18.5952	39.7667	0.253293	-3.948	-1.98112	3.39494e-05	0.000405604	0.215108	-4.64883	-2.21687	1.09245e-05	0.000168851	0.456784	-2.18922	-1.13042	0.00370774	0.0199317	0.467608	-2.13855	-1.09663	0.00453605	0.0240615	0.849247	-1.17751
1430043_at	Ttc19	tetratricopeptide repeat domain 19	NM_028360 /// NM_029704	chr11:62281506-62315250 (+) // 92.37 // qB2 chr11:62281472-62282590 (+) // 89.38 // qB2	NCBI 38	254.504	332.281	351.431	254.633	343.267	395.046	214.039	289.98	194.922	349.116	288.558	325.875	383.922	256.797	98.3265	153.134	309.75	325.635	249.129	269.786	317.902	122.707	1.24333	1.24333	0.314209	0.300823	0.502816	1.30709	1.30709	0.386358	0.208049	0.3878	2.19862	2.19862	1.1366	0.00186439	0.0115542	2.59074	2.59074	1.37336	0.000418767	0.00357434	1.05128	1.05128
1450798_at	Tnxb	tenascin XB	NM_031176	chr17:34670534-34719814 (+) // 99.61 // qB1 chr17:34670534-34719814 (+) // 99.61 // qB1	NCBI 38	172.92	185.485	158.368	195.235	215.748	179.557	697.251	353.124	130.058	221.251	189.435	151.155	233.961	212.302	403.047	148.398	171.899	196.292	496.201	175.992	195.813	244.564	0.34643	-2.88658	-1.52936	0.00153453	0.00828651	0.39559	-2.52787	-1.33792	0.00395781	0.0177808	0.719618	-1.38963	-0.474697	0.236174	0.461965	0.800659	-1.24897	-0.32074	0.416445	0.653253	1.1419	1.1419
1444078_at	Cd8a	CD8 antigen, alpha chain	NM_001081110 /// NM_009857	chr6:71373426-71377618 (+) // 98.43 // qC1 chr6:71377301-71377612 (+) // 84.31 // qC1 c	NCBI 38	15.402	15.7209	13.0565	18.9747	14.0308	13.9006	157.073	158.073	16.5828	13.5557	12.8654	16.4787	17.3878	16.9532	106.34	56.7461	14.6766	15.4677	157.572	14.2473	16.9356	77.6805	0.0931422	-10.7363	-3.42442	1.56783e-09	2.10448e-07	0.0981631	-10.1871	-3.34868	2.05945e-09	2.67676e-07	0.183409	-5.4523	-2.44686	8.7166e-08	4.67452e-06	0.218017	-4.5868	-2.19749	3.00901e-07	1.23979e-05	1.05391	1.05391
1444484_at	A130009E19Rik	RIKEN cDNA A130009E19 gene	---	chr6:48730564-48731199 (+) // 75.16 // qB2.3 chr6:48730564-48731199 (+) // 75.16 // qB2	NCBI 38	19.6186	14.9355	16.9516	18.3936	16.3912	19.329	84.0049	161.456	19.8271	19.9657	15.2308	23.7818	16.2586	16.044	63.5807	51.8853	17.0622	17.9954	116.461	18.2007	18.3743	57.4359	0.146506	-6.82568	-2.77097	9.40637e-08	4.54702e-06	0.154519	-6.47168	-2.69414	1.30354e-07	5.93381e-06	0.316887	-3.1557	-1.65796	2.53742e-05	0.000371077	0.31991	-3.12588	-1.64426	2.75585e-05	0.000410881	1.0547	1.0547
1446847_at	Ccdc88c	coiled-coil domain containing 88C	NM_026681	chr12:100911522-100913294 (-) // 88.7 // qE chr12:100920304-100920902 (-) // 14.72 // q	NCBI 38	25.9737	21.9427	15.8464	27.7939	22.36	19.6086	56.4826	63.1701	25.1423	21.344	28.3365	25.9048	24.4023	23.9179	31.3367	27.6946	20.8249	23.0121	59.7327	24.7749	24.7278	29.4595	0.348636	-2.86832	-1.52021	5.56019e-06	9.91395e-05	0.38525	-2.59571	-1.37613	1.56253e-05	0.000223933	0.840983	-1.18908	-0.249851	0.245798	0.473871	0.839383	-1.19135	-0.252599	0.240898	0.468473	1.10502	1.10502
1449347_a_at	Xlr4a /// Xlr4b /// Xlr4c	X-linked lymphocyte-regulated 4A /// X-linked lymphocyte-regulated 4B /// X-linked lymp	NM_001081642 /// NM_021365 /// NM_183094	chrX:73214404-73222845 (+) // 94.02 // qA7.3 /// chrX:74726358-74952733 (+) // 89.76 //	NCBI 38	264.444	111.799	528.432	268.044	116.965	669.068	2044.52	2676.04	240.122	510.303	571.887	302.856	557.573	507.341	1295.22	1028.11	249.989	275.787	2339.04	412.274	440.84	1153.98	0.106878	-9.35643	-3.22596	0.000444949	0.00309495	0.117908	-8.48122	-3.08427	0.000645176	0.00414208	0.357273	-2.79898	-1.4849	0.0508676	0.155204	0.382028	-2.61761	-1.38825	0.0655127	0.188683	1.10319	1.10319
1444734_at	A330001L22Rik	RIKEN cDNA A330001L22 gene	---	chr14:21990283-21991137 (+) // 99.53 // qA3 chr14:21990283-21991137 (+) // 99.53 // qA3	NCBI 38	42.5165	58.4145	67.456	39.7024	92.3846	56.4958	61.274	122.416	39.2061	74.9558	48.8505	49.0029	84.2183	51.1623	38.4559	47.628	55.1283	59.1756	86.6081	52.3628	59.5471	42.7968	0.636526	-1.57103	-0.651709	0.129436	0.279638	0.683261	-1.46357	-0.549491	0.195337	0.37074	1.22352	1.22352	0.291038	0.482373	0.712969	1.39138	1.39138	0.476516	0.257588	0.488627	1.07342	1.07342
1450759_at	Bmp6	bone morphogenetic protein 6	NM_007556	chr13:38345125-38500447 (+) // 97.53 // qA3.3 chr13:38345125-38500447 (+) // 97.53 // q	NCBI 38	241.985	231.447	1038.14	281.416	224.908	883.985	1957.6	4437.95	213.024	285.672	1261.17	219.008	328.554	1668.86	1599.2	1337.17	387.405	382.475	2947.55	424.965	493.358	1462.28	0.131437	-7.60824	-2.92756	0.0104592	0.0394281	0.129764	-7.70631	-2.94604	0.0100873	0.0380774	0.290611	-3.44102	-1.78284	0.0915359	0.239219	0.337381	-2.96401	-1.56755	0.133117	0.314459	0.987273	-1.01289
1424131_at	Col6a3	collagen, type VI, alpha 3	NM_001243008 /// NM_001243009 /// NM_009935	chr1:90766859-90830259 (-) // 96.98 // qD chr1:90766859-90830259 (-) // 96.98 // qD	NCBI 38	3789.35	4345.88	2039.18	2664.71	4804.39	3428.93	1396.98	371.075	4425	5947.24	2034.9	3160.25	5504.22	2614.7	740.571	172.321	3226.15	3527.67	719.969	3769.09	3569.48	357.223	4.481	4.481	2.16382	0.00727191	0.029356	4.89959	4.89959	2.29266	0.00505879	0.0217064	10.5512	10.5512	3.39934	0.000250292	0.00230141	9.99206	9.99206	3.32078	0.000306788	0.00277729	1.09341	1.09341
1427735_a_at	Acta1	actin, alpha 1, skeletal muscle	NM_001272041 /// NM_009606	chr8:123891768-123893470 (-) // 98.24 // qE2 chr8:123891768-123893470 (-) // 98.24 // q	NCBI 38	2729.27	693.346	1439.99	2053.58	665.528	968.128	1710.6	132.333	3745.64	1004.55	1916.57	2380.74	763.998	1983.16	288.494	193.21	1396.79	1097.8	475.783	1932.03	1533.59	236.094	2.9357	2.9357	1.5537	0.124755	0.272038	2.30741	2.30741	1.20627	0.224848	0.409006	8.18312	8.18312	3.03265	0.00698203	0.033147	6.49581	6.49581	2.69951	0.0136974	0.0572728	0.785984	-1.27229
1444872_at	D3Ertd740e	DNA segment, Chr 3, ERATO Doi 740, expressed	---	chr3:37548381-37549354 (+) // 57.92 // qB chr3:37548381-37549354 (+) // 57.92 // qB	NCBI 38	41.8333	46.5838	59.5582	53.2447	47.1399	43.0612	58.4957	82.0374	52.6106	49.8285	56.7751	49.7401	49.5852	42.4109	40.2419	29.3707	48.7791	47.634	69.2734	52.9952	47.1171	34.3793	0.70415	-1.42015	-0.506045	0.0233988	0.0750858	0.687621	-1.45429	-0.540314	0.0168221	0.0571693	1.54149	1.54149	0.624326	0.0074388	0.0348822	1.37051	1.37051	0.454713	0.0381117	0.125907	0.976526	-1.02404
1439081_at	Mgea5	meningioma expressed antigen 5 (hyaluronidase)	NM_023799	chr19:45751160-45783524 (-) // 96.39 // qC3 chr19:45751160-45783524 (-) // 96.39 // qC3	NCBI 38	113.651	137.463	175.875	130.172	120.019	175.448	271.795	400.519	144.134	162.13	210.146	147.548	165.268	209.485	150.227	178.53	140.063	139.95	329.938	169.974	172.223	163.768	0.424511	-2.35565	-1.23613	0.000298207	0.00224757	0.42417	-2.35754	-1.23729	0.000295794	0.00222752	1.0379	1.0379	0.0536674	0.834772	0.931822	1.05163	1.05163	0.0726272	0.777886	0.899703	0.999197	-1.0008
1438828_at	Rapgef6	Rap guanine nucleotide exchange factor (GEF) 6	NM_001252494 /// NM_001252496 /// NM_001252497 /// NM_001252498 /// NM_175258	chr11:54657318-54698286 (+) // 94.38 // qB1.3 chr11:54697624-54699285 (+) // 96.34 // q	NCBI 38	32.7683	32.8744	57.6596	38.2927	36.2138	53.5128	157.6	101.84	44.8351	37.216	55.1295	32.6835	37.8926	63.3674	73.5796	53.7497	39.6031	42.0225	126.689	45.1417	42.8137	62.8879	0.312601	-3.19897	-1.67761	0.000247329	0.00194013	0.331699	-3.01478	-1.59205	0.000388652	0.00276389	0.717812	-1.39312	-0.478322	0.177054	0.380905	0.680795	-1.46887	-0.554708	0.121838	0.296036	1.0611	1.0611
1441953_at	Stox2	storkhead box 2	NM_001114311 /// NM_175162	chr8:47185757-47193110 (-) // 99.38 // qB1.1 chr8:47180047-47182224 (-) // 99.0 // qB1.	NCBI 38	77.682	76.3703	75.6274	84.1787	65.7321	68.5729	153.32	194.417	82.929	86.3137	64.4201	79.2741	71.7499	70.2155	108.563	67.6822	76.5553	72.3956	172.65	77.2568	73.6427	85.7194	0.443413	-2.25524	-1.17328	6.19947e-05	0.000650995	0.419319	-2.38482	-1.25388	3.25287e-05	0.000394482	0.901276	-1.10954	-0.149959	0.46995	0.702015	0.859113	-1.16399	-0.21908	0.296701	0.534768	0.945663	-1.05746
1453540_at	5430404G13Rik	RIKEN cDNA 5430404G13 gene	---	chr16:45763667-45765821 (-) // 93.92 // qB5 chr16:45763667-45765821 (-) // 93.92 // qB5	NCBI 38	294.627	384.736	588.009	208.887	273.213	282.522	99.1358	254.703	249.172	379.117	342.981	330.184	401.317	287.514	65.4785	95.2402	405.453	252.631	158.903	318.796	336.488	78.9693	2.55157	2.55157	1.35139	0.00315789	0.0148405	1.58985	1.58985	0.668891	0.0966363	0.221418	4.03696	4.03696	2.01327	0.000127198	0.00134824	4.26097	4.26097	2.09118	8.94758e-05	0.00104762	0.623087	-1.60491
1459735_at	Fkbp15	FK506 binding protein 15	NM_001045528	chr4:62314233-62334196 (-) // 99.06 // qB3 chr4:62311199-62311883 (-) // 42.4 // qB3 ch	NCBI 38	93.5823	69.3473	100.05	90.4874	57.3446	140.621	129.086	210.108	87.139	75.5439	137.483	98.2092	72.8677	135.603	76.3798	87.7293	86.5901	90.0279	164.691	96.7299	99.005	81.8579	0.525774	-1.90196	-0.927485	0.0294225	0.0901178	0.546648	-1.82933	-0.871316	0.0387718	0.109971	1.18167	1.18167	0.240827	0.535893	0.751977	1.20947	1.20947	0.274375	0.481635	0.708649	1.0397	1.0397
1427429_at	Csf2	colony stimulating factor 2 (granulocyte-macrophage)	NM_009969	chr11:54247263-54249899 (-) // 94.9 // qB1.3 chr11:54247263-54249899 (-) // 94.9 // qB1	NCBI 38	64.2059	47.7654	58.3988	74.3469	46.1489	47.3739	491.735	278.047	66.4418	46.4971	82.2434	59.3707	46.7431	75.8143	329.017	102.663	56.3678	54.5743	369.764	63.3367	59.4766	183.787	0.152442	-6.55985	-2.71367	2.94378e-05	0.000362814	0.147592	-6.77543	-2.76031	2.48488e-05	0.000320201	0.34462	-2.90174	-1.53692	0.00353637	0.0191722	0.323617	-3.09007	-1.62764	0.00237321	0.0143324	0.968182	-1.03286
1456545_at	Il18rap	interleukin 18 receptor accessory protein	NM_010553	chr1:40515361-40549801 (+) // 95.57 // qB chr1:40550428-40551707 (+) // 67.53 // qB chr	NCBI 38	264.003	298.407	257.545	235.869	266.797	248.497	514.104	758.659	240.051	317.258	220.922	225.211	291.878	240.473	341.443	282.643	272.745	250.069	624.523	256.247	250.97	310.662	0.436726	-2.28976	-1.1952	4.25953e-05	0.000484146	0.400415	-2.49741	-1.32043	1.57927e-05	0.000225686	0.824841	-1.21235	-0.277812	0.182949	0.389665	0.807858	-1.23784	-0.307826	0.143098	0.331325	0.916856	-1.09068
1429494_at	Trim35	tripartite motif-containing 35	NM_029979	chr14:66297054-66309711 (+) // 92.1 // qD1 chr14:66297047-66298124 (+) // 88.5 // qD1 c	NCBI 38	130.705	191.672	199.837	162.941	220.672	233.047	150.996	322.785	110.486	226.584	187.149	185.135	234.672	199.458	98.3762	122.642	171.071	203.115	220.762	167.33	205.4	109.841	0.774911	-1.29047	-0.367897	0.302532	0.504699	0.920062	-1.08688	-0.120197	0.731252	0.85591	1.52338	1.52338	0.607276	0.099961	0.255307	1.86998	1.86998	0.903023	0.0207129	0.0790933	1.18731	1.18731
1430774_at	A430106A12Rik	RIKEN cDNA A430106A12 gene	---	chr11:61880309-61881452 (-) // 31.96 // qB2 chr11:61880309-61881452 (-) // 31.96 // qB2	NCBI 38	75.4571	103.413	155.33	81.9895	70.1057	127.568	147.326	190.937	102.75	85.1038	166.961	86.1744	94.2635	169.783	65.1682	106.916	106.621	90.1746	167.72	113.444	111.312	83.4714	0.635709	-1.57305	-0.653562	0.127288	0.275894	0.537651	-1.85994	-0.895258	0.0439621	0.121239	1.35908	1.35908	0.44263	0.289782	0.526011	1.33352	1.33352	0.415239	0.319386	0.558963	0.84575	-1.18238
1449220_at	Gimap3	GTPase, IMAP family member 3	NM_031247	chr6:48764465-48770851 (-) // 67.02 // qB2.3 chr6:48764465-48770851 (-) // 67.02 // qB2	NCBI 38	175.12	134.269	124.813	173.975	146.86	139.511	1338.3	1638.09	189.597	164.344	103.1	193.121	148.463	112.353	1158.28	469.964	143.171	152.757	1481.15	147.553	147.687	737.925	0.0966638	-10.3451	-3.37088	3.59796e-07	1.25209e-05	0.103135	-9.69603	-3.27739	4.94667e-07	1.61432e-05	0.199956	-5.0011	-2.32225	1.98802e-05	0.000306071	0.200138	-4.99654	-2.32093	1.99941e-05	0.000316626	1.06695	1.06695
1456358_at	Etv3	ets variant gene 3	NM_001083318 /// NM_012051	chr3:87525577-87540156 (+) // 97.82 // qF1 chr3:87525577-87540156 (+) // 97.82 // qF1 c	NCBI 38	77.0684	116.41	137.548	71.5291	79.5392	113.507	182.592	307.267	65.5516	76.0712	149.95	95.7588	76.1713	150.245	138.408	100.644	107.261	86.436	236.863	90.7647	103.099	118.026	0.452837	-2.2083	-1.14294	0.0132905	0.0477872	0.36492	-2.74033	-1.45435	0.00298341	0.0141666	0.769025	-1.30035	-0.378898	0.359048	0.60058	0.873535	-1.14477	-0.195063	0.632603	0.817956	0.805852	-1.24092
1437410_at	Aldh2	aldehyde dehydrogenase 2, mitochondrial	NM_009656	chr5:121567701-121567917 (-) // 60.0 // qF chr5:121567701-121567917 (-) // 60.0 // qF c	NCBI 38	232.266	226.093	414.95	192.979	209.685	261.018	491.073	1133.37	218.727	260.121	603.634	365.651	280.709	481.302	232.391	594.883	279.313	219.411	746.046	325.053	366.93	371.817	0.374393	-2.67099	-1.41737	0.0147162	0.0518486	0.2941	-3.40021	-1.76562	0.00391839	0.0176371	0.874227	-1.14387	-0.19392	0.706349	0.863258	0.986855	-1.01332	-0.01909	0.970337	0.987525	0.785538	-1.27301
1457174_at	AU015680	expressed sequence AU015680	---	chr9:14285034-14285583 (-) // 98.54 // qA1 chr9:14285879-14287006 (-) // 92.82 // qA1 c	NCBI 38	37.8762	42.1915	36.2907	44.2107	32.6011	49.9831	125.383	60.3486	47.4128	41.7501	47.5016	39.4653	35.8915	43.1951	62.7426	30.0152	38.7075	41.6098	86.9865	45.4731	39.4045	43.3963	0.444982	-2.24728	-1.16818	0.00277388	0.0133845	0.478345	-2.09054	-1.06388	0.00519559	0.0221984	1.04786	1.04786	0.067446	0.834669	0.931805	0.90802	-1.1013	-0.139204	0.667495	0.838968	1.07497	1.07497
1420161_at	AA409749	expressed sequence AA409749	---	chr10:117788513-117788850 (-) // 99.11 // qD2 chr10:117788513-117788850 (-) // 99.11 //	NCBI 38	73.4772	61.2886	78.5142	69.3431	66.6162	79.8189	98.862	96.3608	66.3877	88.5033	79.2554	77.1094	85.1025	68.4141	58.3877	40.6081	70.7123	71.7074	97.6034	77.51	76.5712	48.6929	0.724484	-1.38029	-0.464974	0.0251977	0.0795938	0.73468	-1.36114	-0.444812	0.0309598	0.0923309	1.59181	1.59181	0.670668	0.00297586	0.0167537	1.57253	1.57253	0.653088	0.00357015	0.0199131	1.01407	1.01407
1442445_at	2610027H17Rik	RIKEN cDNA 2610027H17 gene	---	chr14:78723860-78724327 (-) // 87.11 // qD3 chr14:78723860-78724327 (-) // 87.11 // qD3	NCBI 38	23.0052	28.9342	64.1647	26.5707	23.2108	47.2902	116.504	311.81	26.2317	23.3511	45.4358	23.9963	23.7256	35.5644	83.9572	107.752	34.9551	30.7815	190.597	30.3047	27.2558	95.1136	0.183399	-5.4526	-2.44694	0.000272008	0.00208743	0.1615	-6.19194	-2.63039	0.000142811	0.00125628	0.318617	-3.13856	-1.6501	0.00538189	0.0269431	0.286561	-3.48965	-1.80309	0.00298149	0.0172035	0.880596	-1.13559
1443573_at	Parp1	poly (ADP-ribose) polymerase family, member 1	NM_007415	chr1:180568904-180601254 (+) // 99.08 // qH4 chr1:180568904-180601254 (+) // 99.08 // q	NCBI 38	82.7899	89.059	75.0231	72.376	83.3019	102.892	82.2176	90.7959	61.1389	83.5364	111.585	86.0782	72.7177	114.743	43.4374	42.8255	82.0886	85.2856	86.3994	82.908	89.5518	43.1303	0.950106	-1.05251	-0.0738396	0.765826	0.87768	0.98711	-1.01306	-0.0187172	0.939685	0.970825	1.92227	1.92227	0.942811	0.00192182	0.0118151	2.07631	2.07631	1.05402	0.000819684	0.0061379	1.03895	1.03895
1440586_at	B430203I24Rik	RIKEN cDNA B430203I24 gene	---	chr13:114098873-114099565 (+) // 81.36 // qD2.2 chr13:114098873-114099565 (+) // 81.36	NCBI 38	27.5953	23.0456	29.4979	22.0687	23.3018	24.2714	66.7348	72.8288	26.8538	19.7938	27.987	26.2767	25.9629	21.8913	37.4607	32.3402	26.5708	23.1964	69.7151	24.5941	24.6263	34.8064	0.381133	-2.62376	-1.39163	1.72705e-06	4.11908e-05	0.33273	-3.00544	-1.58758	3.97884e-07	1.38182e-05	0.706596	-1.41523	-0.501043	0.0109682	0.0471974	0.707521	-1.41338	-0.499155	0.0112054	0.0489468	0.873003	-1.14547
1436172_at	Gm20559	predicted gene, 20559	XR_104969	chr6:3333191-3333852 (-) // 9.92 // qA1 chr6:3333191-3333852 (-) // 9.92 // qA1 chr6:33	NCBI 38	364.487	523.891	662.772	499.978	577.981	608.743	2036.88	2045.42	388.779	637.482	631.86	575.091	522.43	627.283	1446.93	718.919	502.065	560.309	2041.2	539.007	573.329	1019.91	0.24597	-4.06554	-2.02345	1.73752e-05	0.000240159	0.274505	-3.64292	-1.8651	3.91122e-05	0.000452772	0.528484	-1.8922	-0.920068	0.0100788	0.0442399	0.562139	-1.77892	-0.831001	0.0175898	0.0697729	1.11601	1.11601
1456065_at	Ubash3a	ubiquitin associated and SH3 domain containing, A	NM_177823	chr17:31219600-31222152 (+) // 64.08 // qA3.3 chr17:31241401-31242500 (+) // 67.57 // q	NCBI 38	48.6357	45.7528	31.9098	54.9529	41.6563	38.6571	93.4651	213.734	42.6247	38.9354	36.4834	41.615	47.0991	36.0032	77.0272	64.7724	41.4095	44.5622	141.338	39.2674	41.3238	70.6344	0.29298	-3.41321	-1.77113	4.62649e-05	0.000516101	0.315286	-3.17172	-1.66527	8.33312e-05	0.000818094	0.555925	-1.7988	-0.847038	0.0132237	0.0546858	0.585038	-1.70929	-0.773398	0.0212601	0.0807523	1.07614	1.07614
1455338_at	A4galt	alpha 1,4-galactosyltransferase	NM_001004150 /// NM_001170954	chr15:83226722-83227598 (-) // 77.48 // qE1 chr15:83226722-83227598 (-) // 77.48 // qE1	NCBI 38	45.1944	80.2027	66.8867	60.4568	66.2742	68.1502	93.0072	148.537	67.1448	80.643	67.9299	60.0654	70.7028	64.4103	64.498	53.5138	62.3549	64.8763	117.538	71.6498	64.9141	58.7497	0.530511	-1.88497	-0.914545	0.00187073	0.00973036	0.551962	-1.81172	-0.857359	0.00296504	0.0141091	1.21957	1.21957	0.286373	0.244153	0.47185	1.10493	1.10493	0.143955	0.550216	0.762047	1.04043	1.04043
1442018_at	Btg1	B cell translocation gene 1, anti-proliferative	NM_007569	chr10:96617020-96619608 (+) // 94.61 // qC3 chrX:15366173-15366482 (+) // 92.16 // qA1.	NCBI 38	156.389	200.485	292.922	144.365	89.0833	242.158	1568.53	1235.16	139.604	122.485	316.06	186.266	89.6042	355.316	773.498	626.852	209.418	146.033	1391.86	175.489	181.008	696.326	0.150456	-6.64646	-2.73259	0.000294693	0.00222517	0.104918	-9.53128	-3.25267	6.00835e-05	0.000630779	0.252022	-3.96791	-1.98838	0.00346295	0.018874	0.259948	-3.84692	-1.94371	0.00403484	0.0219432	0.697331	-1.43404
1458292_at	Psma1	proteasome (prosome, macropain) subunit, alpha type 1	NM_011965	chr7:114264455-114276117 (-) // 98.09 // qF1 chr7:114264605-114265315 (-) // 88.08 // q	NCBI 38	102.417	120.735	263.013	96.0943	144.567	233.291	166.883	278.577	83.4303	133.11	281.281	146.956	134.09	235.868	78.8336	147.623	148.165	147.997	215.629	146.188	166.897	107.885	0.687129	-1.45533	-0.541347	0.342186	0.547908	0.686346	-1.45699	-0.542992	0.340745	0.542178	1.35503	1.35503	0.438325	0.438967	0.675556	1.54698	1.54698	0.629455	0.272324	0.506832	0.998859	-1.00114
1418770_at	Cd2	CD2 antigen	NM_013486	chr3:101275532-101287939 (-) // 100.0 // qF2.2 chr3:101275532-101287939 (-) // 100.0 //	NCBI 38	43.0232	31.298	29.2218	41.0844	37.0937	26.0285	1578.9	1444.51	31.0199	40.5233	33.5415	35.1218	38.2147	24.9318	1286.45	444.654	34.0129	34.1043	1510.17	34.8052	32.2246	756.324	0.0225219	-44.4012	-5.47253	1.49554e-09	2.03762e-07	0.0225825	-44.2821	-5.46865	1.50853e-09	2.08061e-07	0.0460189	-21.7302	-4.44163	1.85635e-08	1.3944e-06	0.042607	-23.4703	-4.55277	1.38246e-08	1.13341e-06	1.00269	1.00269
1441545_at	Zcchc11	zinc finger, CCHC domain containing 11	NM_175472	chr4:108530833-108559415 (+) // 95.06 // qC7 chr4:108513044-108525031 (+) // 77.58 // q	NCBI 38	41.2705	33.8767	48.4496	36.6682	37.5668	47.8836	205.621	147.36	36.864	30.5332	46.2535	40.7052	37.3653	47.1988	106.064	71.7015	40.7639	40.4041	174.07	37.3397	41.5608	87.2063	0.234182	-4.27019	-2.0943	8.60522e-07	2.41809e-05	0.232115	-4.30821	-2.10709	8.0406e-07	2.35633e-05	0.428179	-2.33547	-1.22371	0.000199237	0.00191554	0.47658	-2.09828	-1.06921	0.000630799	0.00496244	0.991175	-1.0089
1422134_at	Fosb	FBJ osteosarcoma oncogene B	NM_008036	chr7:19302696-19309751 (-) // 78.16 // qA3 chr7:19302696-19309751 (-) // 78.16 // qA3	NCBI 38	302.689	68.659	290.435	262.908	44.6161	254.856	2729.72	2937.26	154.753	104.293	141.208	216.86	32.6375	252.11	2135.86	942.249	182.075	144.056	2831.6	131.609	121.291	1418.75	0.0643015	-15.5517	-3.959	0.001059	0.0061668	0.0508749	-19.6561	-4.2969	0.000549123	0.0036485	0.0927619	-10.7803	-3.43032	0.00303703	0.0170345	0.0854898	-11.6973	-3.5481	0.00239687	0.0144379	0.791192	-1.26392
1437270_a_at	Clcf1	cardiotrophin-like cytokine factor 1	NM_019952	chr19:4222951-4223505 (+) // 99.1 // qA chr19:4222951-4223505 (+) // 99.1 // qA chr19:4	NCBI 38	521.277	432.127	477.139	486.702	350.616	452.641	481.301	331.309	524.204	394.416	415.311	464.648	303.192	568.108	266.207	150.456	475.457	425.876	399.325	441.179	430.948	200.131	1.19065	1.19065	0.251749	0.402947	0.607122	1.06649	1.06649	0.0928704	0.754794	0.871129	2.20444	2.20444	1.14041	0.00180202	0.011225	2.15333	2.15333	1.10657	0.00224301	0.0137094	0.895722	-1.11642
1437249_at	Skap1	src family associated phosphoprotein 1	NM_001033186 /// NM_001177898 /// NM_001177899	chr11:96713025-96759140 (+) // 73.85 // qD chr11:96713025-96759140 (+) // 73.85 // qD c	NCBI 38	46.5395	27.6631	27.0662	38.5292	30.5941	26.9357	966.541	1282.5	37.2954	37.3248	27.7868	40.0899	34.8691	24.7759	693.335	449.48	32.6627	31.6655	1113.36	33.8192	32.5964	558.247	0.0293367	-34.0871	-5.09115	2.61328e-10	5.58586e-08	0.028441	-35.1605	-5.13588	2.34532e-10	5.25229e-08	0.060581	-16.5068	-4.04499	4.36321e-09	4.74181e-07	0.0583904	-17.1261	-4.09812	3.72563e-09	4.26471e-07	0.969471	-1.03149
1456064_at	AI504432	expressed sequence AI504432	NM_173787 /// NR_033498	chr3:107053153-107054343 (+) // 96.36 // qF2.3 chr3:107038282-107039562 (+) // 99.15 //	NCBI 38	108.611	126.317	189.172	98.243	81.8351	162.539	915.832	921.072	127.752	53.7521	196.027	104.483	48.4249	276.848	742.663	285.597	137.411	109.317	918.356	110.403	111.877	460.498	0.149627	-6.68328	-2.74056	0.00132037	0.00736366	0.119036	-8.40082	-3.07053	0.00053516	0.00357629	0.239748	-4.17105	-2.06041	0.00904275	0.0406495	0.242947	-4.11612	-2.04129	0.00955004	0.0432192	0.795552	-1.25699
1459667_at	Arhgap17	Rho GTPase activating protein 17	NM_001122640 /// NM_001122641 /// NM_001122642 /// NM_001122643 /// NM_144529	chr7:123279144-123369894 (-) // 95.29 // qF3 chr7:123282936-123284125 (-) // 95.85 // q	NCBI 38	179.176	188.397	264.121	150.267	167.141	253.11	421.712	603.246	108.311	175.414	329.52	180.047	207.008	276.707	211.928	302.083	207.385	185.247	504.402	184.306	217.67	252.996	0.41115	-2.43221	-1.28226	0.00640564	0.0265754	0.367261	-2.72286	-1.44512	0.00291695	0.0139303	0.728494	-1.37269	-0.457011	0.267614	0.500238	0.860367	-1.16229	-0.216976	0.591508	0.791222	0.893255	-1.1195
1423281_at	Stmn2	stathmin-like 2	NM_025285	chr3:8509385-8561607 (+) // 96.76 // qA1 chr3:8509385-8561607 (+) // 96.76 // qA1 chr3:	NCBI 38	18.9139	21.9427	40.3651	17.5926	18.2831	62.912	68.9805	90.1749	21.8702	97.829	83.22	17.1781	107.73	139.672	62.1136	25.2659	25.5874	27.2503	78.8686	56.2578	63.7004	39.6151	0.324429	-3.08234	-1.62403	0.0907069	0.213572	0.345514	-2.89424	-1.53318	0.108181	0.241073	1.42011	1.42011	0.506003	0.578616	0.783282	1.60798	1.60798	0.685249	0.454255	0.68663	1.06499	1.06499
1438876_at	A130014A01Rik	RIKEN cDNA A130014A01 gene	---	chr8:120103160-120103905 (+) // 47.17 // qE1 chr8:120103160-120103905 (+) // 47.17 // q	NCBI 38	50.0521	46.5379	65.9555	40.6566	49.1035	83.4558	133.439	214.921	41.1952	49.6219	115.464	60.7982	51.1413	92.6116	64.3441	112.498	53.5584	55.0259	169.348	61.8002	66.035	85.0795	0.316261	-3.16194	-1.66081	0.00258696	0.0126216	0.324927	-3.07761	-1.62181	0.0030539	0.0144408	0.726379	-1.37669	-0.461206	0.31985	0.559455	0.776158	-1.2884	-0.365578	0.427037	0.663217	1.0274	1.0274
1429469_at	A930013F10Rik	RIKEN cDNA A930013F10 gene	NR_027886	chr8:22634386-22635576 (-) // 41.59 // qA2 chr8:22634386-22635576 (-) // 41.59 // qA2	NCBI 38	91.4716	116.86	172.713	91.2994	94.7267	220.705	110.863	247.091	81.4521	133.677	209.243	121.298	117.832	163.945	60.2124	114.823	122.678	124.043	165.504	131.582	132.819	83.148	0.741239	-1.34909	-0.431989	0.398396	0.603269	0.749493	-1.33424	-0.416013	0.415651	0.61425	1.5825	1.5825	0.662205	0.203815	0.418687	1.59738	1.59738	0.675708	0.195309	0.408313	1.01114	1.01114
1446365_at	Vti1a	vesicle transport through interaction with t-SNAREs 1A	NM_016862	chr19:55316056-55626662 (+) // 95.46 // qD2 chr19:55316056-55626662 (+) // 95.46 // qD2	NCBI 38	29.012	31.6511	40.7161	24.1602	27.928	35.6859	46.0605	174.797	32.0663	30.1255	54.0132	27.2025	34.0825	36.2802	42.5598	47.7499	33.4383	28.8766	89.7288	37.3674	32.2803	45.0801	0.37266	-2.68341	-1.42407	0.00548537	0.0234019	0.321821	-3.10732	-1.63567	0.00213977	0.0108494	0.828912	-1.2064	-0.270709	0.537626	0.753051	0.716063	-1.39653	-0.481842	0.280228	0.516454	0.863578	-1.15797
1439449_at	Satb1	special AT-rich sequence binding protein 1	NM_001163630 /// NM_001163631 /// NM_001163632 /// NM_009122	chr17:51738656-51832669 (-) // 95.16 // qC chr17:51738656-51832669 (-) // 95.16 // qC c	NCBI 38	48.9769	36.2286	28.7058	39.7344	31.9072	29.6418	132.281	99.2893	35.0903	29.4674	26.0809	37.6284	37.0294	22.2195	99.9237	33.218	37.0685	33.4956	114.605	29.9881	31.4002	57.6129	0.323447	-3.0917	-1.6284	0.00111937	0.00645417	0.292271	-3.42148	-1.77462	0.00056315	0.00372359	0.520511	-1.92119	-0.941999	0.0314465	0.107599	0.545019	-1.8348	-0.875622	0.0431037	0.138079	0.903613	-1.10667
1437957_at	7030407O06Rik	RIKEN cDNA 7030407O06 gene	---	chr12:81576247-81576992 (-) // 55.81 // qD1 chr12:81576247-81576992 (-) // 55.81 // qD1	NCBI 38	120.132	121.567	195.669	91.6619	108.414	225.922	148.822	270.616	72.7623	113.551	197.726	112.619	121.328	180.63	84.7307	120.144	141.905	130.935	200.682	117.775	135.142	100.889	0.707113	-1.4142	-0.499987	0.294731	0.496143	0.652451	-1.53268	-0.616059	0.201629	0.379367	1.16738	1.16738	0.223274	0.634056	0.819692	1.33951	1.33951	0.421705	0.373961	0.614763	0.922697	-1.08378
1438498_at	Zmynd15	zinc finger, MYND-type containing 15	NM_001029929	chr11:70464820-70466214 (+) // 95.73 // qB3 chr11:70464820-70466214 (+) // 95.73 // qB3	NCBI 38	112.505	86.0973	170.673	102.295	95.8473	173.736	1148.42	2020.22	98.3588	91.3981	233.069	109.262	90.9204	193.827	813.529	721.471	118.243	119.428	1523.21	127.961	124.408	766.117	0.0776296	-12.8817	-3.68725	2.12353e-06	4.77672e-05	0.0784078	-12.7538	-3.67286	2.2158e-06	5.04211e-05	0.167025	-5.98712	-2.58186	8.0446e-05	0.000931578	0.162388	-6.1581	-2.62248	6.94062e-05	0.000856675	1.01002	1.01002
1429526_at	Brd8	bromodomain containing 8	NM_030147	chr18:34599987-34605691 (-) // 82.39 // qB1 chr18:34599987-34605691 (-) // 82.39 // qB1	NCBI 38	104.968	120.979	133.08	95.3096	109.61	171.546	118.215	199.386	84.6766	121.235	156.197	109.931	127.297	158.385	62.6088	95.3096	119.121	121.465	153.557	117.049	130.382	77.2477	0.775744	-1.28909	-0.366347	0.275411	0.475493	0.791007	-1.26421	-0.338238	0.312445	0.511995	1.51524	1.51524	0.599546	0.0851432	0.227116	1.68784	1.68784	0.755178	0.0354599	0.119269	1.01968	1.01968
1436566_at	Rab40b	Rab40b, member RAS oncogene family	NM_139147	chr11:121356802-121388245 (-) // 86.93 // qE2 chr11:121356123-121356802 (-) // 100.0 //	NCBI 38	435.458	562.008	487.06	598.116	724.71	471.593	85.2201	72.4094	424.084	635.66	176.616	475.198	769.042	206.098	57.1965	27.3412	492.142	589.076	78.5538	362.423	422.31	39.5424	6.26502	6.26502	2.64732	0.000337241	0.00248163	7.49901	7.49901	2.9067	0.00014766	0.00128813	9.16542	9.16542	3.1962	6.09273e-05	0.000745666	10.6799	10.6799	3.41683	3.18591e-05	0.000460096	1.19697	1.19697
1436074_at	Nfkbid	nuclear factor of kappa light polypeptide gene enhancer in B cells inhibitor, delta	NM_172142	chr7:30428048-30428745 (+) // 98.17 // qB1 chr7:30428048-30428745 (+) // 98.17 // qB1	NCBI 38	174.963	138.956	301.079	195.818	116.184	310.237	2494.22	1952.92	176.828	115.36	390.13	215.525	110.034	345.771	2387.48	517.173	194.164	191.821	2207.04	199.651	201.653	1111.2	0.0879747	-11.3669	-3.50677	0.000207912	0.00168684	0.0869136	-11.5057	-3.52427	0.000198901	0.00162665	0.179673	-5.56565	-2.47655	0.00323765	0.0179013	0.181475	-5.5104	-2.46216	0.00336937	0.0189881	0.987938	-1.01221
1440268_at	Trim41	tripartite motif-containing 41	NM_145377	chr11:48806403-48816429 (-) // 94.91 // qB1.2 chr11:48814654-48815414 (-) // 78.48 // q	NCBI 38	85.7824	149.359	239.309	71.7909	156.096	159.849	201.958	331.121	89.2926	178.966	240.281	142.942	228.189	196.359	88.504	191.598	145.277	121.448	258.597	156.591	185.71	130.22	0.561788	-1.78003	-0.831902	0.138925	0.294342	0.469643	-2.12928	-1.09036	0.0594011	0.152792	1.20252	1.20252	0.266061	0.622399	0.812469	1.42613	1.42613	0.512105	0.349377	0.589762	0.835978	-1.1962
1440884_s_at	A530047J11Rik	RIKEN cDNA A530047J11 gene	---	chr11:46971076-46972311 (-) // 93.48 // qB1.1 chr11:46971076-46972311 (-) // 93.48 // q	NCBI 38	189.519	269.386	188.027	207.888	313.985	255.925	43.8345	35.9878	256.209	250.228	157.335	208.839	263.515	234.994	28.8724	13.8571	212.528	255.633	39.7177	216.065	234.725	20.0022	5.35094	5.35094	2.41979	2.93695e-06	6.12878e-05	6.43625	6.43625	2.68622	9.35417e-07	2.62691e-05	10.802	10.802	3.43323	5.6469e-08	3.30325e-06	11.7349	11.7349	3.55273	3.77605e-08	2.40868e-06	1.20282	1.20282
1441331_at	A230061C15Rik	RIKEN cDNA A230061C15 gene	---	chr10:13979481-13980619 (+) // 95.37 // qA2 chr10:13979481-13980619 (+) // 95.37 // qA2	NCBI 38	89.8716	91.1078	180.226	87.2136	90.4249	94.8367	462.573	274.98	128.477	91.6734	131.237	119.403	98.8711	96.3815	164.637	196.047	113.85	90.7779	356.723	115.623	104.384	179.695	0.319153	-3.13329	-1.64768	9.29681e-05	0.000893449	0.254477	-3.92963	-1.97439	1.58714e-05	0.000226667	0.643439	-1.55415	-0.636125	0.0508266	0.155107	0.580892	-1.72149	-0.783658	0.0200584	0.0771427	0.797349	-1.25416
1441753_at	Rictor	RPTOR independent companion of MTOR, complex 2	NM_030168	chr15:6756458-6783206 (+) // 97.09 // qA1 chr15:6708378-6762459 (+) // 73.15 // qA1 chr	NCBI 38	49.6949	70.656	107.891	64.49	73.7728	113.537	137.192	200.519	44.6831	72.2852	111.393	69.5446	69.9668	91.9555	78.5179	88.9257	72.3575	81.4544	165.86	71.1361	76.4853	83.56	0.436255	-2.29224	-1.19676	0.00824287	0.032534	0.491103	-2.03623	-1.0259	0.019263	0.0636097	0.851319	-1.17465	-0.232228	0.555158	0.766279	0.915334	-1.0925	-0.12763	0.744781	0.88261	1.12572	1.12572
1430636_at	Ppp4r1l-ps	protein phosphatase 4, regulatory subunit 1-like, pseudogene	NM_001033179 /// NM_001039579 /// NR_027957	chr2:173580245-173587854 (-) // 89.85 // qH3 chr2:173580245-173587854 (-) // 89.85 // q	NCBI 38	58.571	56.8674	82.3059	50.4309	64.3405	68.2423	119.197	412.751	53.4319	72.7122	82.1866	57.2223	62.6105	75.2224	101.865	122.757	64.9618	60.4986	221.805	68.3496	64.5932	111.824	0.292878	-3.41439	-1.77163	0.00057168	0.00377944	0.272755	-3.6663	-1.87432	0.000356361	0.00258562	0.611224	-1.63606	-0.710227	0.0921477	0.240354	0.577632	-1.73121	-0.791777	0.0637235	0.184963	0.931292	-1.07378
1458376_at	B930025B16Rik	RIKEN cDNA B930025B16 gene	---	chr14:120341019-120341662 (+) // 96.97 // qE4 chr14:120341019-120341662 (+) // 96.97 //	NCBI 38	223.577	190.918	322.133	143.318	181.539	251.502	416.725	420.368	218.13	214.324	297.547	224.127	217.457	231.314	221.275	201.235	239.574	187.045	418.557	240.503	224.229	211.021	0.572385	-1.74708	-0.804942	0.00599122	0.0251437	0.446882	-2.23773	-1.16203	0.000396192	0.00280513	1.13972	1.13972	0.188679	0.455143	0.689423	1.0626	1.0626	0.0875986	0.726448	0.872352	0.780736	-1.28084
1436854_at	Trpc2	transient receptor potential cation channel, subfamily C, member 2	NM_001109897 /// NM_011644	chr7:102078783-102083762 (+) // 99.1 // qE2 chr7:102077784-102096416 (+) // 98.85 // qE	NCBI 38	69.885	108.47	118.422	69.3431	96.9605	136.267	112.716	208.145	59.5198	112.134	139.053	91.1002	97.3936	118.995	50.1065	119.346	96.4661	97.1249	153.202	97.5426	101.826	77.3248	0.629667	-1.58814	-0.667339	0.155381	0.319162	0.633965	-1.57737	-0.657525	0.161081	0.323157	1.26146	1.26146	0.335094	0.462104	0.695499	1.31686	1.31686	0.397102	0.385519	0.625555	1.00683	1.00683
1426324_at	H2-D1 /// H2-L	histocompatibility 2, D region locus 1 /// histocompatibility 2, D region locus L	NM_001267808 /// NM_010380	chr17:35263095-35267344 (+) // 84.01 // qB1 chr17:33892021-34000199 (-) // 76.08 // qB1	NCBI 38	494.719	593.584	734.353	652.605	568.677	717.563	6419.69	5063.59	666.92	552.177	971.524	732.83	509.656	963.684	3455.02	2397.61	599.672	643.368	5701.4	709.899	711.332	2878.1	0.105181	-9.50739	-3.24905	6.02604e-08	3.26659e-06	0.112846	-8.86166	-3.14757	8.72977e-08	4.38442e-06	0.246653	-4.05428	-2.01945	1.17228e-05	0.000199967	0.247151	-4.04611	-2.01654	1.18969e-05	0.000208454	1.07287	1.07287
1443586_at	Fip1l1	FIP1 like 1 (S. cerevisiae)	NM_001159573 /// NM_001159574 /// NM_024183	chr5:74535523-74592429 (+) // 93.7 // qC3.3 chr5:74535516-74598790 (+) // 96.69 // qC3.	NCBI 38	65.2831	64.4355	97.4304	53.2664	69.2625	100.423	93.4862	134.961	55.632	70.0616	97.045	71.7714	61.8346	110.966	45.6817	70.4498	74.2804	71.8228	112.325	72.3204	78.9693	56.7296	0.661295	-1.51219	-0.596634	0.107748	0.243703	0.639415	-1.56393	-0.645176	0.0844894	0.200292	1.27482	1.27482	0.350294	0.328796	0.569019	1.39202	1.39202	0.47718	0.190286	0.401407	0.966914	-1.03422
1442063_at	Adamtsl1	ADAMTS-like 1	NM_029967 /// NM_172542	chr4:86053951-86199698 (+) // 99.5 // qC4 chr4:86423352-86426144 (+) // 97.4 // qC4 chr	NCBI 38	96.8318	149.632	85.893	137.049	227.795	214.228	88.8632	88.3831	144.949	204.578	76.8977	154.625	255.36	64.9478	63.8886	31.3712	107.563	188.415	88.6194	131.621	136.883	44.7697	1.21377	1.21377	0.279495	0.60826	0.776175	2.12612	2.12612	1.08822	0.0618104	0.157765	2.93998	2.93998	1.55581	0.0119454	0.0505295	3.05749	3.05749	1.61235	0.00974891	0.0439122	1.75167	1.75167
1439839_at	D130051D11Rik	RIKEN cDNA D130051D11 gene	---	chr15:85666615-85668068 (+) // 87.76 // qE2 chr15:85666615-85668068 (+) // 87.76 // qE2	NCBI 38	50.0364	63.8871	62.193	43.6232	53.4726	77.9403	89.8579	192.161	41.674	51.6341	56.2645	51.9981	52.7853	64.1656	68.3675	64.4664	58.3641	56.6502	131.404	49.4703	56.0534	66.3884	0.444157	-2.25146	-1.17086	0.00161017	0.00862063	0.431115	-2.31957	-1.21386	0.00122597	0.00692888	0.745167	-1.34198	-0.424364	0.173288	0.375638	0.844325	-1.18438	-0.24413	0.421999	0.658726	0.970636	-1.03025
1439933_at	B430316J06Rik	RIKEN cDNA B430316J06 gene	---	chr6:93917763-93918442 (-) // 26.55 // qD1 chr6:93917763-93918442 (-) // 26.55 // qD1	NCBI 38	11.427	12.8152	19.3761	13.2736	13.2928	15.6869	26.028	33.9175	13.7854	12.5549	17.4574	13.5322	12.6761	14.0878	15.642	14.4445	14.1571	14.0405	29.7119	14.4567	13.4193	15.0313	0.476477	-2.09874	-1.06952	0.000258101	0.00200424	0.472551	-2.11617	-1.08146	0.000234131	0.00184899	0.961775	-1.03974	-0.0562287	0.797407	0.91346	0.89276	-1.12012	-0.163656	0.459347	0.690613	0.99176	-1.00831
1440109_at	D7Ertd413e	DNA segment, Chr 7, ERATO Doi 413, expressed	---	chr7:47006509-47007122 (-) // 73.51 // qB3 chr7:47006509-47007122 (-) // 73.51 // qB3	NCBI 38	12.2759	14.2673	18.7728	11.3734	11.7964	13.6285	21.9427	46.5421	13.3308	11.7764	17.9637	13.4001	12.6271	16.7558	17.3151	15.115	14.8699	12.2282	31.9572	14.1282	14.1533	16.1778	0.465308	-2.14911	-1.10374	0.00204057	0.0104309	0.382644	-2.61339	-1.38593	0.000335452	0.00245963	0.873313	-1.14506	-0.195429	0.507334	0.732278	0.874868	-1.14303	-0.192863	0.512831	0.73425	0.822346	-1.21603
1452125_at	Thrap3	thyroid hormone receptor associated protein 3	NM_146153	chr4:126171782-126180390 (-) // 83.66 // qD2.2 chr4:126178787-126202647 (-) // 96.25 //	NCBI 38	218.815	405.48	498.089	137.801	302.792	273.61	515.986	955.436	204.162	360.544	577.919	308.294	335.331	351.932	297.864	424.59	353.53	225.161	702.157	349.036	331.34	355.654	0.503493	-1.98612	-0.989956	0.0533595	0.143197	0.320671	-3.11846	-1.64083	0.00378495	0.0171615	0.981394	-1.01896	-0.0270956	0.954999	0.984332	0.93164	-1.07338	-0.102156	0.829997	0.925499	0.636892	-1.57012
1425673_at	Lpp	LIM domain containing preferred translocation partner in lipoma	NM_001145952 /// NM_001145954 /// NM_178665	chr16:24683497-24685185 (+) // 87.21 // qB1 chr16:24683497-24685185 (+) // 87.21 // qB1	NCBI 38	226	221.506	415.018	186.422	221.795	338.225	334.496	358.647	221.324	263.856	275.36	249.356	314.508	240.328	187.819	163.959	274.909	240.927	346.36	252.397	266.125	175.485	0.793704	-1.25991	-0.333327	0.258923	0.455612	0.695594	-1.43762	-0.523683	0.0865601	0.203861	1.43829	1.43829	0.524355	0.086175	0.229094	1.51652	1.51652	0.600765	0.0531909	0.161514	0.876389	-1.14105
1458414_at	D2Ertd93e	DNA segment, Chr 2, ERATO Doi 93, expressed	---	chr2:168202126-168202900 (-) // 41.3 // qH3 chr2:168202126-168202900 (-) // 41.3 // qH3	NCBI 38	92.5426	104.912	173.417	89.8441	117.297	157.025	182.87	193.985	126.727	111.186	133.947	126.115	88.7824	142.127	97.8225	93.1122	118.965	118.281	188.346	123.581	116.75	95.4385	0.631633	-1.5832	-0.662842	0.0347681	0.102529	0.628002	-1.59235	-0.671159	0.0329034	0.0967323	1.29488	1.29488	0.372818	0.207449	0.423512	1.2233	1.2233	0.290778	0.319584	0.559121	0.994251	-1.00578
1457539_at	D10Ertd709e	DNA segment, Chr 10, ERATO Doi 709, expressed	---	chr10:111174267-111174913 (+) // 97.23 // qD1 chr10:111174267-111174913 (+) // 97.23 //	NCBI 38	72.1444	55.4897	147.926	106.313	74.8045	173.85	282.923	202.708	87.2052	58.5904	166.29	133.018	73.6211	149.595	183.786	80.1709	83.9769	111.403	239.471	94.7156	113.57	121.384	0.350676	-2.85163	-1.51179	0.0156085	0.0543372	0.465203	-2.1496	-1.10407	0.0631429	0.160413	0.780296	-1.28156	-0.357907	0.521302	0.742216	0.935627	-1.0688	-0.0959946	0.862444	0.940752	1.32659	1.32659
1459560_at	Spopl	speckle-type POZ protein-like	NM_001165997 /// NM_001165998 /// NM_029773	chr2:23510059-23537495 (-) // 99.23 // qA3 chr2:23506217-23506983 (-) // 96.37 // qA3 c	NCBI 38	35.9842	38.9394	56.2093	35.0385	34.6175	30.8007	62.006	93.286	44.2989	32.4401	80.0772	38.0979	31.2978	44.3745	30.7785	48.3411	42.8651	33.4297	76.0444	48.64	37.5419	38.5727	0.563685	-1.77404	-0.827039	0.0304703	0.0924979	0.43961	-2.27474	-1.1857	0.00409302	0.0182771	1.26099	1.26099	0.334557	0.343682	0.584753	0.973271	-1.02746	-0.0390865	0.910331	0.961499	0.779885	-1.28224
1444229_at	Nr2f2	nuclear receptor subfamily 2, group F, member 2	NM_009697 /// NM_183261	chr7:70352619-70360592 (-) // 94.52 // qC chr7:70352619-70360592 (-) // 94.52 // qC chr	NCBI 38	37.0708	101.233	70.6042	29.4726	65.5919	78.6116	68.9661	266.514	39.7224	97.5555	66.8929	39.3515	87.7671	57.0851	68.7114	69.0501	64.2284	53.3646	135.574	63.7613	58.2021	68.8803	0.473752	-2.11081	-1.0778	0.101843	0.233157	0.393617	-2.54054	-1.34514	0.0468184	0.127241	0.925677	-1.08029	-0.111419	0.858317	0.943089	0.844972	-1.18347	-0.243025	0.697686	0.856865	0.830851	-1.20359
1430152_at	Eps15	epidermal growth factor receptor pathway substrate 15	NM_001159964 /// NM_007943	chr4:109280274-109387814 (+) // 98.77 // qC7 chr4:109280274-109387814 (+) // 98.77 // q	NCBI 38	48.9879	38.519	115.122	41.7136	24.4652	66.017	159.584	246.485	50.6203	33.2639	126.422	55.4863	31.6023	103.782	86.419	117.652	60.1161	40.6911	198.303	59.7091	56.671	100.808	0.303153	-3.29867	-1.72188	0.0181884	0.0613734	0.205197	-4.87338	-2.28492	0.00335862	0.0156114	0.592308	-1.68831	-0.755581	0.256632	0.486932	0.562168	-1.77883	-0.830927	0.214575	0.434321	0.676875	-1.47738
1438076_at	Gm5481 /// Gm6109 /// Gm6570 /// Gm7429 /// Rpl30	predicted gene 5481 /// predicted gene 6109 /// predicted gene 6570 /// predicted pseud	NM_001163485 /// NM_009083 /// XM_001475319 /// XM_484529 /// XM_884704 /// XM_891806 /	chr15:34440506-34441928 (-) // 86.05 // qB3.1 chr15:34440506-34441928 (-) // 86.05 // q	NCBI 38	133.805	166.431	308.485	112.518	161.464	304.693	112.188	213.648	79.0639	163.012	195.649	127.787	150.966	236.667	47.3523	130.872	190.099	176.898	154.819	136.111	165.895	78.7217	1.22788	1.22788	0.29617	0.606955	0.775227	1.14261	1.14261	0.192333	0.737559	0.860308	1.72902	1.72902	0.789955	0.183301	0.390041	2.10737	2.10737	1.07544	0.0780434	0.214732	0.930552	-1.07463
1442083_at	Rsrc2	arginine/serine-rich coiled-coil 2	NM_001005523 /// NM_001005525 /// NM_025438	chr5:123741946-123742797 (-) // 78.1 // qF chr5:123741946-123742797 (-) // 78.1 // qF c	NCBI 38	114.21	234.545	299.396	196.426	270.11	340.527	199.066	447.766	120.422	217.344	341.047	239.429	238.047	364.648	107.715	214.256	200.167	262.397	298.554	207.439	274.939	151.914	0.670452	-1.49153	-0.576794	0.281553	0.482147	0.878894	-1.13779	-0.186239	0.722567	0.850138	1.3655	1.3655	0.449429	0.397218	0.638985	1.80983	1.80983	0.855854	0.119515	0.291986	1.3109	1.3109
1419178_at	Cd3g	CD3 antigen, gamma polypeptide	NM_009850	chr9:44969571-44980426 (-) // 84.18 // qA5.2 chr9:44969571-44980426 (-) // 84.18 // qA5	NCBI 38	15.3929	15.385	13.0483	16.5378	15.6332	17.1454	2470.88	3955.85	16.2591	17.2725	15.6454	14.2686	17.4824	19.6998	2311.42	1096.94	14.5655	16.427	3126.43	16.3787	17.0013	1592.3	0.00465892	-214.642	-7.74579	4.65768e-13	4.7901e-10	0.00525436	-190.318	-7.57227	6.20567e-13	6.2196e-10	0.0102861	-97.2182	-6.60316	3.50048e-12	1.97344e-09	0.0106771	-93.6581	-6.54934	3.88074e-12	2.18781e-09	1.12781	1.12781
1422667_at	Krt15	keratin 15	NM_008469	chr11:100131758-100135949 (-) // 91.42 // qD chr11:100131758-100135949 (-) // 91.42 //	NCBI 38	63.6459	53.7915	39.1638	62.6921	56.135	38.8992	141.62	43.0282	53.6798	62.5883	42.2929	55.4641	51.5002	45.0519	43.5386	36.3944	51.1825	51.5382	78.0621	52.1823	50.4866	39.8064	0.655668	-1.52516	-0.608963	0.144641	0.30298	0.660223	-1.51464	-0.598975	0.150806	0.307871	1.3109	1.3109	0.390558	0.337562	0.578259	1.2683	1.2683	0.342896	0.39784	0.637177	1.00695	1.00695
1457445_at	Trps1	trichorhinophalangeal syndrome I (human)	NM_032000	chr15:50654751-50657733 (-) // 95.16 // qC chr15:50657617-50659846 (-) // 94.33 // qC c	NCBI 38	47.0374	40.6223	110.977	44.1005	38.1888	88.2284	98.217	190.297	54.4397	36.7128	108.828	56.3979	41.4547	96.9338	63.7264	76.2878	59.6326	52.9636	136.714	60.1411	60.9676	69.7205	0.436184	-2.29261	-1.19699	0.0498998	0.135853	0.387405	-2.58128	-1.36809	0.028152	0.0857198	0.862606	-1.15928	-0.213226	0.705999	0.86302	0.874461	-1.14356	-0.193534	0.731987	0.875489	0.888168	-1.12591
1438495_at	Top1	topoisomerase (DNA) I	NM_009408	chr2:160645956-160722764 (+) // 94.63 // qH2 chr2:160649415-160650109 (+) // 100.0 // q	NCBI 38	151.265	154.779	400.414	146.299	127.913	360.868	574.453	821.19	184.749	182.55	584.141	193.885	177.676	519.63	325.99	376.46	210.851	189.013	686.811	270.072	261.584	350.308	0.307002	-3.25731	-1.70368	0.0191049	0.0638259	0.275204	-3.63367	-1.86143	0.0119102	0.0434527	0.770958	-1.29709	-0.375276	0.565404	0.77354	0.746727	-1.33918	-0.421347	0.519371	0.73907	0.896426	-1.11554
1450723_at	Isl1	ISL1 transcription factor, LIM/homeodomain	NM_021459	chr13:116298268-116309663 (-) // 94.46 // qD2.2 chr13:116298268-116309663 (-) // 94.46	NCBI 38	324.102	493.034	415.398	327.778	506.586	445.686	66.5174	69.8714	267.84	339.138	149.581	290.11	381.405	218.906	40.0426	30.258	404.894	419.844	68.1735	238.62	289.332	34.8081	5.93914	5.93914	2.57025	3.18612e-06	6.51984e-05	6.15842	6.15842	2.62256	2.56357e-06	5.62263e-05	6.8553	6.8553	2.77722	1.3712e-06	3.81775e-05	8.3122	8.3122	3.05523	4.73084e-07	1.72626e-05	1.03692	1.03692
1418670_s_at	Hspg2	perlecan (heparan sulfate proteoglycan 2)	NM_008305	chr4:137468820-137570630 (+) // 92.91 // qD3 chr4:137468820-137570630 (+) // 92.91 // q	NCBI 38	1741.35	1320.67	1511.86	1436.95	1547.98	1518.15	1785.14	2621.88	1914.61	1604.76	1214.3	1367.98	1554.85	1367.73	1635.09	746.235	1514.89	1500.26	2163.42	1551.02	1427.52	1104.67	0.700251	-1.42806	-0.514056	0.0957252	0.222564	0.693478	-1.44201	-0.528078	0.0879095	0.2062	1.40407	1.40407	0.489615	0.110818	0.274872	1.29231	1.29231	0.369952	0.218432	0.439662	0.990328	-1.00977
1430438_at	Bod1l	biorientation of chromosomes in cell division 1-like	NM_001081422	chr5:41789971-41791845 (-) // 99.89 // qB3 chr5:41789971-41791845 (-) // 99.89 // qB3 c	NCBI 38	21.3728	28.9028	29.9697	23.4437	24.4862	22.2733	28.133	56.8471	20.4089	21.5559	39.4881	21.9163	24.2912	36.863	19.5356	21.3721	26.4543	23.3835	39.9909	25.8991	26.9733	20.4333	0.661505	-1.51171	-0.596176	0.0951226	0.221483	0.584721	-1.71022	-0.77418	0.0361379	0.104071	1.2675	1.2675	0.341986	0.320484	0.560122	1.32007	1.32007	0.400614	0.247858	0.476662	0.883926	-1.13132
1451234_at	Fam193b	family with sequence similarity 193, member B	NM_145382	chr13:55539315-55549434 (-) // 95.9 // qB1 chr13:55539315-55549434 (-) // 95.9 // qB1	NCBI 38	384.778	405.02	561.843	416.191	459.294	549.796	1293.11	2040.36	379.278	459.982	583.175	481.165	483.525	649.398	864.75	797.821	444.051	471.907	1624.3	466.839	532.63	830.646	0.27338	-3.65791	-1.87102	4.22858e-06	8.09136e-05	0.290531	-3.44198	-1.78324	7.0293e-06	0.000119318	0.562018	-1.7793	-0.831312	0.00506673	0.0256729	0.641224	-1.55952	-0.6411	0.022109	0.0831987	1.06273	1.06273
1460238_at	Msln	mesothelin	NM_018857	chr17:25748612-25754359 (-) // 98.99 // qA3.3 chr17:25748612-25754359 (-) // 98.99 // q	NCBI 38	662.722	632.422	305.167	706.36	578.094	251.465	473.86	337.634	410.654	1297.84	334.345	448.347	1054.84	342.258	299.57	140.118	503.822	468.274	399.99	562.687	544.935	204.838	1.25959	1.25959	0.332954	0.618206	0.783503	1.17072	1.17072	0.227396	0.732923	0.857116	2.74698	2.74698	1.45785	0.0437701	0.138716	2.66032	2.66032	1.4116	0.0498348	0.153914	0.929448	-1.07591
1447343_at	Nrp2	neuropilin 2	NM_001077403 /// NM_001077404 /// NM_001077405 /// NM_001077406 /// NM_001077407 /// NM	chr1:62703704-62796981 (+) // 85.35 // qC2 chr1:62817668-62818692 (+) // 94.7 // qC2 ch	NCBI 38	57.9058	62.084	51.3628	61.1535	53.0096	65.3768	77.6617	209.948	61.8152	50.3548	64.7106	58.6518	58.4768	62.3551	71.295	60.0234	56.9443	59.6211	127.691	58.6187	59.8015	65.4168	0.445955	-2.24238	-1.16503	0.00180693	0.009453	0.466918	-2.1417	-1.09876	0.0027514	0.0132974	0.896081	-1.11597	-0.158299	0.603694	0.8005	0.914161	-1.0939	-0.12948	0.670579	0.840532	1.04701	1.04701
1422245_a_at	Mrvi1	MRV integration site 1	NM_010826 /// NM_194464	chr7:110868271-110946187 (-) // 94.38 // qE3 chr7:110868271-110946187 (-) // 94.38 // q	NCBI 38	352.52	458.172	473.596	329.86	412.086	453.41	101.788	95.8863	396.093	596.128	236.419	353.5	573.89	249.388	61.5696	41.6708	424.494	394.998	98.7932	382.183	369.851	50.6524	4.2968	4.2968	2.10326	8.40965e-05	0.000828311	3.99824	3.99824	1.99937	0.000134464	0.0011978	7.54521	7.54521	2.91556	3.0856e-06	7.1147e-05	7.30178	7.30178	2.86825	3.67821e-06	8.46368e-05	0.930515	-1.07467
1423606_at	Postn	periostin, osteoblast specific factor	NM_001198765 /// NM_001198766 /// NM_015784	chr3:54361109-54391041 (+) // 95.65 // qC chr3:54361109-54391041 (+) // 95.65 // qC	NCBI 38	9919.23	14127.4	6958.6	9722.54	14488.4	9260.77	724.563	328.989	9194.24	15081.2	6253.41	8849.96	15275.9	8094.11	290.117	216.029	9916.39	10926.2	488.224	9535.55	10304.6	250.344	20.3109	20.3109	4.34418	2.16277e-07	8.53272e-06	22.3797	22.3797	4.48412	1.50166e-07	6.62036e-06	38.09	38.09	5.25134	2.36102e-08	1.68488e-06	41.1616	41.1616	5.36323	1.83758e-08	1.39334e-06	1.10186	1.10186
1440513_at	C80258	expressed sequence C80258	---	chr9:46080293-46081150 (+) // 50.29 // qA5.2 chr9:46080293-46081150 (+) // 50.29 // qA5	NCBI 38	58.2025	52.7302	92.9856	49.4636	48.0185	46.7335	157.509	153.735	80.0592	57.7452	73.2395	69.6139	77.7093	59.8849	70.0661	90.971	65.8372	48.0588	155.61	69.6987	68.6796	79.8372	0.423091	-2.36356	-1.24096	0.000106985	0.000997335	0.308842	-3.23791	-1.69506	4.76057e-06	8.98729e-05	0.873009	-1.14546	-0.195932	0.401365	0.643122	0.860248	-1.16246	-0.217175	0.353798	0.594177	0.729965	-1.36993
1445701_at	Atp2b4	ATPase, Ca++ transporting, plasma membrane 4	NM_001167949 /// NM_213616	chr1:133713421-133713740 (-) // 70.75 // qE4 chr1:133713421-133713740 (-) // 70.75 // q	NCBI 38	94.3487	71.3344	70.7192	77.9925	71.2847	84.1951	186.26	166.883	96.483	64.5413	63.1391	83.9913	74.5668	66.1653	108.113	75.6882	78.0772	77.6449	176.305	73.2593	74.5512	90.4589	0.442852	-2.25809	-1.1751	0.000118806	0.00107986	0.440399	-2.27067	-1.18312	0.000111588	0.00102982	0.80986	-1.23478	-0.304256	0.183089	0.3898	0.824143	-1.21338	-0.279033	0.219674	0.441255	0.994462	-1.00557
1429902_at	5830443J22Rik	RIKEN cDNA 5830443J22 gene	---	chr9:71910495-71911655 (-) // 88.36 // qD chr9:71910495-71911655 (-) // 88.36 // qD	NCBI 38	25.8397	27.2429	45.6472	29.6831	28.3024	43.3513	159.174	88.1134	34.1651	35.1555	39.8244	27.2048	39.8244	50.7557	68.1385	54.247	31.792	33.1471	118.429	36.3001	38.0272	60.7975	0.268448	-3.72511	-1.89729	6.17229e-05	0.000648896	0.27989	-3.57283	-1.83707	8.37819e-05	0.000821802	0.597068	-1.67485	-0.744033	0.0399308	0.129464	0.625473	-1.59879	-0.67698	0.0581698	0.172816	1.04262	1.04262
1417597_at	Cd28	CD28 antigen	NM_007642	chr1:60746418-60770930 (+) // 96.4 // qC2 chr1:60746418-60770930 (+) // 96.4 // qC2 chr	NCBI 38	109.48	140.956	347.956	174.798	176	311.499	786.452	879.308	181.205	39.8615	543.441	220.278	56.135	437.117	620.797	293.828	175.098	212.393	831.51	157.734	175.486	427.073	0.210578	-4.74884	-2.24757	0.0372541	0.108177	0.255429	-3.91498	-1.96901	0.0630112	0.160168	0.369338	-2.70755	-1.43699	0.161624	0.358836	0.410903	-2.43367	-1.28313	0.207884	0.425129	1.21299	1.21299
1422272_at	Phxr4	per-hexamer repeat gene 4	NM_008835 /// NR_028271	chr9:13431360-13432738 (+) // 68.5 // qA1 chr9:13431360-13432738 (+) // 68.5 // qA1	NCBI 38	79.7909	78.239	101.958	76.5408	78.73	85.8994	149.482	180.976	90.7518	81.1715	83.437	83.3041	77.4142	79.386	103.989	68.671	86.02	80.2923	164.502	85.0235	79.9979	84.5059	0.52291	-1.91237	-0.935365	0.000151506	0.00130801	0.488093	-2.04879	-1.03477	5.9059e-05	0.000622632	1.00613	1.00613	0.00881672	0.960893	0.986301	0.946652	-1.05635	-0.0790939	0.661977	0.835665	0.933417	-1.07133
1422850_at	Pabpn1	poly(A) binding protein, nuclear 1	NM_019402	chr14:54894601-54898924 (+) // 88.95 // qC2 chr14:54894147-54898183 (+) // 81.37 // qC2	NCBI 38	822.326	923.865	1279.92	881.693	970.496	1257.19	829.046	1304.65	548.563	1102.73	1179.22	1001.87	1304.23	1051.66	360.951	791.596	990.711	1024.64	1040.02	893.504	1111.74	534.524	0.952596	-1.04976	-0.0700636	0.855183	0.928695	0.985218	-1.015	-0.0214851	0.955355	0.978516	1.67159	1.67159	0.741221	0.0707899	0.198316	2.07993	2.07993	1.05653	0.0149422	0.0613813	1.03425	1.03425
1427509_at	Baiap3	BAI1-associated protein 3	NM_001163270	chr17:25242658-25244356 (-) // 87.26 // qA3.3 chr17:25242658-25244356 (-) // 87.26 // q	NCBI 38	98.2661	47.5233	45.2719	84.7043	58.4067	63.3072	183.922	477.11	72.4962	60.3565	51.3269	66.9302	57.1614	44.1731	177.683	130.547	59.5727	67.9108	296.227	60.7849	55.2874	152.303	0.201104	-4.97256	-2.31399	6.20847e-05	0.000651788	0.229252	-4.362	-2.12499	0.000137589	0.00121746	0.399105	-2.50561	-1.32516	0.00544595	0.0272032	0.363011	-2.75474	-1.46191	0.002826	0.0164884	1.13997	1.13997
1450928_at	Id4	inhibitor of DNA binding 4	NM_031166	chr13:48261087-48264860 (+) // 94.99 // qA5 chr13:48261087-48264860 (+) // 94.99 // qA5	NCBI 38	121.486	162.893	232.733	129.422	136.503	309.255	1805.53	2046.3	157.317	234.661	110.305	156.161	193.906	143.156	873.566	1118.74	166.378	176.126	1922.14	159.688	163.051	988.584	0.0865584	-11.5529	-3.53018	6.19326e-07	1.88477e-05	0.0916298	-10.9135	-3.44804	8.06001e-07	2.35895e-05	0.161532	-6.19073	-2.63011	1.46401e-05	0.000239979	0.164934	-6.06301	-2.60004	1.64585e-05	0.000269534	1.05859	1.05859
1430317_at	Ube2j2	ubiquitin-conjugating enzyme E2J 2	NM_001039157 /// NM_001039158 /// NM_001039159 /// NM_021402	chr4:155949004-155957708 (+) // 95.44 // qE2 /// chr14:56010183-56011317 (-) // 97.02 /	NCBI 38	106.371	183.307	300.486	97.3478	163.785	227.99	291.743	537.547	73.5529	203.203	297.663	166.965	210.208	255.951	163.524	253.97	180.271	153.753	396.017	164.46	207.872	203.787	0.455211	-2.19679	-1.13539	0.0673899	0.170453	0.388248	-2.57567	-1.36495	0.0321985	0.0951629	0.807015	-1.23913	-0.309333	0.595673	0.795495	1.02004	1.02004	0.0286257	0.960557	0.984033	0.852898	-1.17247
1438643_at	Camk1d	calcium/calmodulin-dependent protein kinase ID	NM_177343	chr2:5293458-5297642 (-) // 96.54 // qA1 chr2:5562865-5563162 (-) // 76.09 // qA1 chr2:	NCBI 38	32.1008	38.4134	39.7106	38.655	40.2146	30.2035	143.344	225.961	42.8916	37.994	70.172	36.2777	32.1113	54.6851	89.8342	95.4877	36.5847	36.0758	179.972	48.5382	39.9383	92.618	0.20328	-4.91932	-2.29846	2.44263e-06	5.33487e-05	0.200451	-4.98874	-2.31868	2.22113e-06	5.05169e-05	0.52407	-1.90814	-0.932169	0.00653119	0.0314167	0.431215	-2.31903	-1.21352	0.00102901	0.00737476	0.986084	-1.01411
1435710_at	AI661384	expressed sequence AI661384	---	chr18:89271538-89272229 (+) // 73.4 // qE4 chr18:89271538-89272229 (+) // 73.4 // qE4	NCBI 38	15.3664	11.0888	11.8468	12.6358	12.6676	11.497	1070.66	1202.02	11.6742	11.6506	11.1957	11.562	13.0786	12.0267	972.894	350.481	12.6382	12.2544	1134.47	11.5047	12.2062	583.925	0.0111405	-89.7622	-6.48804	1.76483e-11	7.80351e-09	0.0108022	-92.5735	-6.53253	1.61997e-11	7.30623e-09	0.0197024	-50.7552	-5.66548	9.58754e-11	2.66918e-08	0.0209037	-47.8385	-5.5801	1.15789e-10	3.01861e-08	0.969632	-1.03132
1458218_s_at	Pde7a	phosphodiesterase 7A	NM_001122759 /// NM_008802	chr3:19224994-19264958 (-) // 91.39 // qA2 chr3:19224994-19264958 (-) // 91.39 // qA2 c	NCBI 38	247.707	385.946	453.838	295.448	397.676	423.428	962.52	1316.67	280.427	321.75	415.453	307.873	333.703	414.545	798.75	420.509	351.385	367.785	1125.77	334.669	349.219	579.554	0.312135	-3.20375	-1.67976	0.000127641	0.00114243	0.326702	-3.06089	-1.61395	0.000183345	0.00153358	0.57746	-1.73172	-0.792207	0.024679	0.0889727	0.602567	-1.65957	-0.730806	0.0356841	0.11988	1.04667	1.04667
1449235_at	Fasl	Fas ligand (TNF superfamily, member 6)	NM_001205243 /// NM_010177	chr1:161780693-161788733 (-) // 96.82 // qH2.1 chr1:161780693-161788733 (-) // 96.82 //	NCBI 38	23.2479	16.7712	18.5232	18.4886	17.3659	19.0386	456.591	1436.22	17.4189	16.697	16.8185	18.4544	18.4544	21.6344	487.001	357.475	19.3295	18.2844	809.793	16.9752	19.4588	417.242	0.0238697	-41.8941	-5.38868	7.77235e-10	1.24712e-07	0.022579	-44.2889	-5.46887	6.48274e-10	1.11595e-07	0.0406844	-24.5795	-4.61938	5.07415e-09	5.32208e-07	0.0466367	-21.4424	-4.42239	8.57707e-09	7.8785e-07	0.945928	-1.05716
1422860_at	Nts	neurotensin	NM_024435	chr10:102481752-102490435 (-) // 99.83 // qD1 chr10:102481752-102490435 (-) // 99.83 //	NCBI 38	51.723	80.9633	570.272	46.6208	64.1044	638.767	145.163	150.408	51.771	55.3625	514.367	35.0123	45.4676	378.197	115.513	50.2094	133.665	124.052	147.763	113.813	84.4397	76.1567	0.904594	-1.10547	-0.144658	0.919435	0.962367	0.839535	-1.19114	-0.252338	0.860009	0.93045	1.49446	1.49446	0.579624	0.686191	0.851399	1.10876	1.10876	0.148947	0.917054	0.964599	0.928079	-1.07749
1435600_s_at	Ccm2l	cerebral cavernous malformation 2-like	NM_145536	chr2:153081156-153081735 (+) // 76.84 // qH1 chr2:153081156-153081735 (+) // 76.84 // q	NCBI 38	77.1996	50.006	86.3642	77.15	62.7522	121.509	1535.66	2545.2	58.5976	51.7526	86.5774	59.3575	67.7218	77.7914	1097.68	946.365	69.3412	83.7896	1977	64.0333	67.8751	1019.18	0.0350741	-28.5111	-4.83345	1.76145e-09	2.30939e-07	0.0423825	-23.5947	-4.56039	3.572e-09	3.93889e-07	0.0628282	-15.9164	-3.99244	1.7666e-08	1.33683e-06	0.0665979	-15.0155	-3.90838	2.27542e-08	1.63674e-06	1.20837	1.20837
1434526_at	Ephx4	epoxide hydrolase 4	NM_001001804	chr5:107413143-107430029 (+) // 99.11 // qE5 chr5:107413143-107430029 (+) // 99.11 // q	NCBI 38	18.9841	20.5817	17.0848	16.3021	16.5511	19.6032	90.9242	32.1811	22.2687	20.5727	20.8247	22.1473	20.5135	18.3039	31.9951	24.3611	18.8291	17.4233	54.093	21.2091	20.2598	27.9183	0.348087	-2.87285	-1.52248	0.000279175	0.00213155	0.322101	-3.10461	-1.63441	0.000148554	0.00129243	0.759681	-1.31634	-0.396534	0.22087	0.44161	0.72568	-1.37802	-0.462595	0.157483	0.353859	0.925348	-1.08067
1443242_at	D5Ertd121e	DNA segment, Chr 5, ERATO Doi 121, expressed	---	chr5:25401699-25402363 (-) // 15.73 // qA3 chr5:25401699-25402363 (-) // 15.73 // qA3	NCBI 38	10.6852	9.9575	13.7121	10.6022	8.74189	11.0279	27.1235	28.9157	10.0598	9.47177	14.0616	10.7128	9.60952	13.0978	13.8014	15.1503	11.3417	10.0731	28.0053	11.0243	11.0476	14.4601	0.404985	-2.46923	-1.30406	2.19918e-05	0.000289676	0.359687	-2.78019	-1.47519	6.18465e-06	0.000108324	0.762393	-1.31166	-0.391393	0.0741886	0.205161	0.764002	-1.3089	-0.388352	0.0761981	0.210783	0.888149	-1.12594
1449864_at	Il4	interleukin 4	NM_021283 /// NR_027491	chr11:53612462-53618665 (-) // 84.25 // qB1.3 chr11:53612462-53618665 (-) // 84.25 // q	NCBI 38	36.2801	29.8278	25.6929	35.6629	35.9514	25.3576	801.4	364.677	36.0409	34.6047	35.5206	34.5424	36.0415	27.472	685.051	113.846	30.2948	31.9163	540.582	35.3839	32.46	279.267	0.0560411	-17.844	-4.15737	3.72705e-06	7.35962e-05	0.0590409	-16.9374	-4.08214	4.52904e-06	8.65894e-05	0.126702	-7.89254	-2.98049	0.000105046	0.00115666	0.116233	-8.60344	-3.10491	7.15878e-05	0.000876645	1.05353	1.05353
1425226_x_at	LOC665506	T-cell receptor beta-2 chain C region-like	XM_977361	chr6:41178440-41548350 (+) // 90.44 // qB1 chr6:41178440-41548350 (+) // 90.44 // qB1 c	NCBI 38	194.515	140.547	124.794	194.743	151.581	124.816	4595.98	5039.37	178.651	148.135	122.879	183.986	166.959	118.985	3716.86	1665.88	150.542	154.451	4812.6	148.154	154.038	2488.4	0.0312811	-31.9682	-4.99856	1.09315e-09	1.5802e-07	0.0320937	-31.1588	-4.96157	1.19719e-09	1.71746e-07	0.0595393	-16.7956	-4.07001	1.31585e-08	1.08296e-06	0.061904	-16.154	-4.01382	1.5535e-08	1.24892e-06	1.02598	1.02598
1447217_at	Uhrf2	ubiquitin-like, containing PHD and RING finger domains 2	NM_144873	chr19:30071145-30071613 (+) // 72.99 // qC1 chr19:30071145-30071613 (+) // 72.99 // qC1	NCBI 38	22.8218	29.0695	42.9699	20.8099	25.6762	43.9276	37.035	59.9645	30.0706	28.7199	30.8184	23.9247	21.0992	43.6203	22.0111	26.9948	30.5417	28.6317	47.1253	29.8568	28.0284	24.3758	0.648098	-1.54298	-0.625716	0.114072	0.254395	0.607566	-1.64591	-0.718887	0.0734891	0.179917	1.22485	1.22485	0.292605	0.442049	0.677986	1.14984	1.14984	0.201433	0.594372	0.792935	0.93746	-1.06671
1446512_at	Zc3h15	zinc finger CCCH-type containing 15	NM_026934	chr2:83653399-83664622 (+) // 95.69 // qD chr2:83653399-83664622 (+) // 95.69 // qD chr	NCBI 38	28.3637	46.4467	106.749	17.4304	44.7346	42.5395	54.1323	107.275	23.1459	32.6627	95.7523	51.7547	38.9722	81.4403	39.5992	39.2709	52.0029	32.1302	76.2037	41.6764	54.7664	39.4346	0.682417	-1.46538	-0.551275	0.412135	0.615466	0.421636	-2.37171	-1.24593	0.0779037	0.188236	1.05685	1.05685	0.0797706	0.904275	0.962561	1.38879	1.38879	0.473828	0.479327	0.707029	0.617856	-1.6185
1430428_at	2310066F23Rik	RIKEN cDNA 2310066F23 gene	---	chr19:55554708-55556174 (+) // 76.07 // qD2 chr19:55554708-55556174 (+) // 76.07 // qD2	NCBI 38	31.0503	25.3018	46.7501	34.8356	39.2768	46.6578	80.6733	96.6583	48.2848	36.8704	53.9927	40.8214	40.2499	40.7462	47.5541	43.9338	33.2405	39.9662	88.3048	45.8081	40.6051	45.7082	0.376428	-2.65655	-1.40955	4.27999e-05	0.000485982	0.452595	-2.20948	-1.14371	0.000293718	0.00221707	1.00218	1.00218	0.00314165	0.989421	0.996357	0.888355	-1.12568	-0.170792	0.476435	0.704607	1.20234	1.20234
1437798_at	6720422M22Rik	RIKEN cDNA 6720422M22 gene	---	chr3:148930855-148931477 (-) // 87.46 // qH3 chr3:148930855-148931477 (-) // 87.46 // q	NCBI 38	25.4067	20.3079	32.1993	23.7476	22.1422	33.8062	130.952	284.495	30.515	24.7011	29.027	25.1406	21.0659	26.7616	90.4593	110.361	25.5163	26.0982	193.016	27.9691	24.2004	99.9157	0.132198	-7.56438	-2.91923	2.38462e-07	9.12297e-06	0.135213	-7.39573	-2.88669	2.71056e-07	1.02129e-05	0.279926	-3.57237	-1.83688	3.42309e-05	0.0004686	0.242208	-4.12868	-2.04568	1.15747e-05	0.000204158	1.0228	1.0228
1456671_at	Tbrg3	transforming growth factor beta regulated gene 3	NR_027799	chr15:82895641-82896456 (-) // 69.33 // qE1 chr15:82895641-82896456 (-) // 69.33 // qE1	NCBI 38	37.3715	31.2756	38.9287	32.3268	30.9266	28.7867	55.4288	55.7639	41.7312	31.2786	32.4206	34.8396	32.8156	25.6817	39.0718	21.2087	35.7002	30.6452	55.596	34.8479	30.8502	28.7865	0.642138	-1.5573	-0.639045	0.0154784	0.0539942	0.551211	-1.81419	-0.859323	0.00246932	0.0121423	1.21056	1.21056	0.275675	0.250557	0.479865	1.07169	1.07169	0.0998876	0.670064	0.840296	0.858401	-1.16496
1455616_at	Aebp2	AE binding protein 2	NM_001005605 /// NM_009637 /// NM_178803	chr6:140623896-140678730 (+) // 82.18 // qG2 chr6:140637658-140653204 (+) // 97.46 // q	NCBI 38	237.259	234.431	242.301	286.735	220.396	305.099	428.14	302.948	305.831	253.444	254.957	308.489	243.904	215.856	213.651	162.902	237.974	268.149	360.144	270.36	253.245	186.559	0.660775	-1.51337	-0.597769	0.0122383	0.0447546	0.744557	-1.34308	-0.425546	0.058816	0.151621	1.4492	1.4492	0.535257	0.0218452	0.0809497	1.35745	1.35745	0.440899	0.0513586	0.15737	1.12679	1.12679
1443629_at	Nav1	neuron navigator 1	NM_173437	chr1:135436743-135439638 (-) // 91.28 // qE4 chr1:135435711-135436737 (-) // 83.41 // q	NCBI 38	114.985	120.482	115.008	92.2419	109.259	139.404	127.36	178.372	99.2398	131.212	120.267	133.288	131.404	124.36	63.0378	96.9225	116.797	112	150.722	116.128	129.626	78.165	0.774911	-1.29047	-0.367897	0.113226	0.252965	0.743089	-1.34573	-0.428393	0.0696119	0.17257	1.48567	1.48567	0.571114	0.0206073	0.0775024	1.65836	1.65836	0.729757	0.00508076	0.0262995	0.958934	-1.04282
1448079_at	Rnf166	ring finger protein 166	NM_001033142	chr8:122466145-122476074 (-) // 89.16 // qE1 --- ---	NCBI 38	42.8289	101.069	117.548	42.9528	86.8643	82.2881	137.619	426.033	33.5875	100.873	154.163	70.1644	109.601	134.153	103.159	153.073	79.8345	67.4614	242.13	80.5337	101.044	125.662	0.329718	-3.03289	-1.6007	0.0289194	0.0889759	0.278618	-3.58915	-1.84364	0.0142697	0.0502576	0.640877	-1.56036	-0.641881	0.342345	0.583239	0.804096	-1.24363	-0.31456	0.63709	0.820471	0.845018	-1.18341
1449350_at	Osr1	odd-skipped related 1 (Drosophila)	NM_011859	chr12:9574473-9581499 (+) // 96.97 // qA1.1 chr12:9574473-9581499 (+) // 96.97 // qA1.1	NCBI 38	635.414	1589.49	466.154	732.753	1745.17	433.582	74.0781	211.594	603.471	1448.52	296.972	658.472	1823.95	312.11	62.1171	68.0294	777.948	821.53	125.197	637.919	721.027	65.006	6.21379	6.21379	2.63547	0.00808002	0.0319861	6.56186	6.56186	2.7141	0.00675665	0.0274731	9.81321	9.81321	3.29473	0.00182169	0.0113324	11.0917	11.0917	3.47141	0.00123072	0.00846266	1.05602	1.05602
1430404_at	LOC75771	uncharacterized LOC75771	---	chr7:75700863-75702924 (+) // 88.56 // qD1 chr7:75700863-75702924 (+) // 88.56 // qD1	NCBI 38	34.6983	34.6983	41.5803	36.2499	25.9177	35.0862	118.45	72.0338	40.6942	34.4991	41.6698	31.6216	34.7613	37.84	71.098	32.3718	36.8553	32.0637	92.3711	38.8198	34.648	47.9746	0.398993	-2.50631	-1.32556	0.00055559	0.003698	0.347118	-2.88086	-1.5265	0.00016409	0.00140216	0.809174	-1.23583	-0.305478	0.313165	0.552218	0.722213	-1.38463	-0.469504	0.130923	0.311029	0.869986	-1.14944
1442352_at	9430091N11Rik	RIKEN cDNA 9430091N11 gene	---	chr15:26697235-26698545 (-) // 98.71 // qB1 chr15:26697235-26698545 (-) // 98.71 // qB1	NCBI 38	18.0592	16.1549	18.8605	20.2023	16.8438	18.1509	37.9781	72.7347	17.9539	17.0677	18.523	19.3578	17.6813	17.8952	23.9474	31.1267	17.6543	18.3476	52.5577	17.8381	18.2966	27.3021	0.335904	-2.97704	-1.57388	6.96447e-06	0.000117422	0.349095	-2.86455	-1.51831	1.01285e-05	0.000159443	0.65336	-1.53055	-0.61405	0.0144421	0.0585908	0.670152	-1.4922	-0.57744	0.0198959	0.0766486	1.03927	1.03927
1423835_at	Zfp503	zinc finger protein 503	NM_145459	chr14:21983958-21987992 (-) // 88.35 // qA3 chr14:21983958-21987992 (-) // 88.35 // qA3	NCBI 38	2361.78	2079.43	1774.02	2079.3	2190.68	1632.32	3053.55	1963.45	2528.32	2031.91	1105.48	2265.56	1714.04	1297.35	1532.24	1057.1	2057.68	1951.81	2448.53	1784.12	1714.3	1272.72	0.84036	-1.18997	-0.250921	0.471216	0.669154	0.797112	-1.25453	-0.327146	0.350951	0.552373	1.40187	1.40187	0.487353	0.173237	0.375614	1.34696	1.34696	0.429707	0.226086	0.449611	0.948536	-1.05426
1438200_at	Sulf1	sulfatase 1	NM_001198565 /// NM_001198566 /// NM_172294	chr1:12860394-12861191 (+) // 97.79 // qA3 chr1:12839889-12860428 (+) // 96.5 // qA3 ch	NCBI 38	2973.03	2816.42	3303.78	3062.93	2775.9	2872.72	407.646	370.686	3201.99	3351	2434.33	3249.43	3415.59	2820.49	290.104	140.827	3024.33	2901.33	388.718	2967.02	3151.67	202.122	7.78025	7.78025	2.95982	1.78324e-08	1.27256e-06	7.46391	7.46391	2.89993	2.27391e-08	1.56813e-06	14.6792	14.6792	3.8757	6.80712e-10	1.16291e-07	15.5924	15.5924	3.96277	5.17998e-10	9.19772e-08	0.959341	-1.04238
1449393_at	Sh2d1a	SH2 domain protein 1A	NM_011364	chrX:42502564-42522089 (+) // 90.83 // qA4 chrX:42502564-42522089 (+) // 90.83 // qA4	NCBI 38	11.3883	10.5668	11.2823	12.7244	11.4799	13.3579	291.189	479.279	12.4106	12.5134	12.2597	13.3835	13.6694	13.6631	226.642	166.819	11.073	12.496	373.579	12.3942	13.5713	194.444	0.0296404	-33.7377	-5.07629	8.61281e-13	7.76892e-10	0.0334496	-29.8958	-4.90187	1.34011e-12	1.11927e-09	0.0637418	-15.6883	-3.97162	1.89403e-11	7.28846e-09	0.069796	-14.3275	-3.84071	2.88114e-11	1.04792e-08	1.12851	1.12851
1456207_at	Mtcp1	mature T cell proliferation 1	NM_001039373 /// NM_010839	chrX:75410443-75416543 (-) // 72.31 // qA7.3 chrX:75404850-75416596 (-) // 98.26 // qA7	NCBI 38	14.9834	20.254	26.7365	15.8867	16.4196	28.2436	41.0898	75.6527	14.7382	18.0149	29.1006	21.93	20.6166	36.9845	27.821	30.3064	20.0944	19.4601	55.7597	19.7693	25.5725	29.0398	0.360375	-2.77489	-1.47243	0.00204856	0.0104622	0.349	-2.86533	-1.5187	0.0016309	0.00869751	0.680766	-1.46893	-0.554769	0.170945	0.3725	0.880597	-1.13559	-0.183446	0.639677	0.822244	0.968436	-1.03259
1443257_at	9630050E16Rik	RIKEN cDNA 9630050E16 gene	---	chr14:45488345-45489001 (-) // 55.47 // qC1 chr14:45488345-45489001 (-) // 55.47 // qC1	NCBI 38	55.5587	50.4262	62.0781	51.6464	49.0074	47.1549	85.2324	130.062	48.4618	62.3446	46.6658	51.3385	50.8038	49.2988	51.4807	58.4344	55.8188	49.2353	105.287	52.0472	50.473	54.8473	0.530158	-1.88623	-0.915506	0.000217271	0.00174766	0.467627	-2.13846	-1.09657	4.04212e-05	0.000464113	0.948948	-1.0538	-0.0755991	0.681573	0.848742	0.920242	-1.08667	-0.119915	0.517272	0.737599	0.882052	-1.13372
1441689_at	Nup153	nucleoporin 153	NM_175749	chr13:46701119-46701685 (-) // 97.17 // qA5 chr13:46701119-46701685 (-) // 97.17 // qA5	NCBI 38	34.6752	36.2477	47.4482	31.5525	33.7552	59.995	99.2157	82.455	35.1639	32.6501	56.7753	39.2443	36.0545	57.8571	40.1752	55.2862	39.0708	39.9798	90.4513	40.2465	43.4222	47.1299	0.431955	-2.31506	-1.21105	0.00221585	0.0111475	0.442004	-2.26242	-1.17787	0.00269933	0.0130808	0.853953	-1.17102	-0.227771	0.486607	0.716358	0.921336	-1.08538	-0.118201	0.716122	0.866916	1.02326	1.02326
1442732_at	Hadhb	hydroxyacyl-Coenzyme A dehydrogenase/3-ketoacyl-Coenzyme A thiolase/enoyl-Coenzyme A hy	NM_145558	chr2:108948769-108950737 (+) // 94.18 // qE3 /// chr5:30155301-30184588 (+) // 95.14 //	NCBI 38	82.4131	108.047	110.614	81.1653	84.8474	87.6019	180.06	223.639	80.6145	100.503	76.6818	91.5837	93.0641	111.766	101.673	107.581	99.4983	84.4971	200.67	85.3329	98.3996	104.588	0.495829	-2.01682	-1.01209	5.02787e-05	0.000549993	0.421073	-2.37488	-1.24786	6.04885e-06	0.0001064	0.815899	-1.22564	-0.293538	0.108118	0.270106	0.940829	-1.06289	-0.0879956	0.613366	0.80554	0.849231	-1.17754
1434141_at	Gucy1a3	guanylate cyclase 1, soluble, alpha 3	NM_021896	chr3:82093803-82145852 (-) // 99.14 // qE3 chr3:82093803-82145852 (-) // 99.14 // qE3 c	NCBI 38	268.899	374.298	338.472	245.352	375.053	304.736	230.2	440.61	262.617	140.735	88.8	250.307	156.922	106.241	178.583	154.538	324.177	303.809	318.476	148.609	160.998	166.123	1.0179	1.0179	0.0255958	0.953933	0.979086	0.953946	-1.04828	-0.0680205	0.877891	0.939242	0.894574	-1.11785	-0.160727	0.717136	0.869169	0.969148	-1.03183	-0.0452111	0.91858	0.965416	0.93717	-1.06704
1440614_at	Arhgap23	Rho GTPase activating protein 23	NM_021493	chr11:97490072-97502402 (+) // 94.91 // qD chr11:97490072-97502402 (+) // 94.91 // qD c	NCBI 38	83.9646	82.6114	113.296	82.9702	95.0093	110.367	112.064	264.225	83.1486	77.3303	96.3991	94.1212	99.277	91.4127	62.0948	129.846	92.2822	95.465	172.076	85.2625	94.8812	89.7929	0.536285	-1.86468	-0.898928	0.0193895	0.0645567	0.554782	-1.80251	-0.850007	0.025517	0.0794508	0.949547	-1.05313	-0.0746887	0.827871	0.929182	1.05667	1.05667	0.0795249	0.816945	0.919697	1.03449	1.03449
1459678_at	LOC497255	uncharacterized LOC497255	---	chr15:73423678-73424108 (+) // 97.95 // qD3 chr15:73423678-73424108 (+) // 97.95 // qD3	NCBI 38	41.6105	62.5086	71.3329	49.5188	68.9554	71.715	138.213	254.797	37.4571	61.119	83.472	56.8336	59.1938	99.7715	101.673	94.3945	57.0352	62.5627	187.66	57.5993	69.4966	97.9661	0.303929	-3.29024	-1.71819	0.000485436	0.00331873	0.333383	-2.99955	-1.58475	0.000935037	0.00555468	0.587951	-1.70082	-0.766232	0.0597336	0.174734	0.709393	-1.40966	-0.495343	0.205108	0.421439	1.09691	1.09691
1449440_at	Lpin3	lipin 3	NM_001199118 /// NM_022883	chr2:160888090-160906205 (+) // 88.5 // qH2 chr2:160888090-160906205 (+) // 88.5 // qH2	NCBI 38	100.669	109.797	116.788	103.797	96.7129	114.819	137.754	229.547	85.7295	113.396	145.398	78.3745	127.116	191.364	62.893	137.297	108.883	104.848	177.822	112.225	123.996	92.9247	0.612315	-1.63315	-0.707654	0.0851821	0.203941	0.589621	-1.696	-0.76214	0.0660774	0.166076	1.20771	1.20771	0.272274	0.485874	0.715657	1.33438	1.33438	0.41617	0.292868	0.530816	0.962938	-1.03849
1444942_at	Helz	helicase with zinc finger domain	NM_198298	chr11:107671213-107687168 (+) // 97.19 // qE1 chr11:107688816-107689436 (+) // 85.0 //	NCBI 38	107.357	88.7361	86.2479	93.0847	79.8089	101.422	160.755	130.547	80.1741	96.3608	83.1632	92.8719	106.184	82.554	75.9848	75.4523	93.6625	90.9972	144.866	86.2887	93.3741	75.7199	0.646546	-1.54668	-0.629175	0.00200993	0.0103106	0.628145	-1.59199	-0.67083	0.00124576	0.00701701	1.13958	1.13958	0.188502	0.268475	0.501272	1.23316	1.23316	0.30236	0.0866658	0.231751	0.971539	-1.02929
1440260_at	Ccdc58	coiled-coil domain containing 58	NM_001159421 /// NM_001159422 /// NM_198645	chr16:36071666-36092111 (+) // 94.39 // qB3 chr16:36072092-36073223 (+) // 78.96 // qB3	NCBI 38	27.8484	54.4307	55.1726	20.592	50.5899	34.7951	40.6915	123.985	25.2564	50.8733	69.9373	30.8822	52.9089	51.9247	30.6828	44.9542	43.7309	33.0947	71.0292	44.7908	43.9411	37.1392	0.615676	-1.62423	-0.699757	0.222061	0.410442	0.465934	-2.14623	-1.1018	0.0646703	0.163462	1.20603	1.20603	0.270266	0.628529	0.816262	1.18314	1.18314	0.242621	0.663764	0.83675	0.756783	-1.32138
1430165_at	Stk17b	serine/threonine kinase 17b (apoptosis-inducing)	NM_133810	chr1:53755507-53785202 (-) // 97.54 // qC1.1 chr1:53760572-53762693 (-) // 77.46 // qC1	NCBI 38	83.992	92.4298	209.5	105.217	70.5234	250.271	1204.2	1545.86	93.068	85.7197	374.223	128.319	80.2374	286.267	562.41	905.939	117.6	122.916	1364.35	143.991	143.377	713.792	0.0861941	-11.6017	-3.53627	0.000265784	0.00205294	0.0900899	-11.1	-3.47249	0.000311286	0.00231786	0.201726	-4.95722	-2.30953	0.00647631	0.0312327	0.200867	-4.97843	-2.31569	0.00636966	0.0313902	1.0452	1.0452
1454639_x_at	Gm10736 /// Rpl41	predicted gene 10736 /// ribosomal protein L41	NM_018860 /// XR_105587 /// XR_106827	chr10:128548113-128549078 (-) // 59.77 // qD3 chr10:128548113-128549136 (-) // 82.25 //	NCBI 38	340.629	379.746	373.61	332.175	365.357	365.537	559.215	930.235	270.047	387.235	339.846	381.809	376.308	344.735	336.084	425.235	364.249	353.989	721.252	328.776	367.248	378.041	0.505024	-1.98011	-0.985576	0.000344143	0.00252262	0.490799	-2.0375	-1.0268	0.000241246	0.00189291	0.869682	-1.14985	-0.20144	0.342516	0.583443	0.971449	-1.02939	-0.0417898	0.84119	0.930321	0.971833	-1.02898
1418057_at	Tiam1	T cell lymphoma invasion and metastasis 1	NM_001145886 /// NM_001145887 /// NM_009384	chr16:89787110-89960827 (-) // 97.17 // qC3.3 chr16:89787110-89960827 (-) // 97.17 // q	NCBI 38	950.228	1232.85	741.162	908.869	1191.5	917.186	1492.25	3287.97	863.47	1444.48	562.05	849.329	1369.64	590.943	1363.74	989.264	954.016	997.754	2215.01	888.329	882.554	1161.52	0.430691	-2.32185	-1.21527	0.0155582	0.0542073	0.450436	-2.22007	-1.15061	0.02062	0.0670693	0.7648	-1.30753	-0.386846	0.391383	0.633169	0.759826	-1.31609	-0.396259	0.380292	0.620662	1.04585	1.04585
1448500_a_at	Lime1 /// Zgpat	Lck interacting transmembrane adaptor 1 /// zinc finger, CCCH-type with G patch domain	NM_001048148 /// NM_023684 /// NM_144894	chr2:181380902-181383628 (+) // 98.71 // qH4 chr2:181365392-181380786 (+) // 98.16 // q	NCBI 38	184.874	180.543	279.333	187.136	168.77	269.56	766.31	1383.8	155.844	196.491	269.248	211.972	209.055	271.267	535.043	545.184	210.467	204.197	1029.77	202.022	229.077	540.103	0.204381	-4.89283	-2.29067	4.30172e-06	8.18615e-05	0.198293	-5.04304	-2.33429	3.51462e-06	7.10182e-05	0.374045	-2.67348	-1.41872	0.000432001	0.00355152	0.424137	-2.35773	-1.2374	0.00129452	0.00881804	0.970214	-1.0307
1453852_at	Ddx50	DEAD (Asp-Glu-Ala-Asp) box polypeptide 50	NM_053183	chr10:62615791-62651198 (-) // 98.49 // qB4 chr10:62649673-62650784 (-) // 77.45 // qB4	NCBI 38	49.1826	82.3841	101.668	56.1078	78.213	135.171	74.6514	129.75	60.6476	80.3361	103.86	66.4558	78.6854	103.505	34.252	77.8835	74.4067	84.0223	98.4173	79.6874	81.495	51.6351	0.756033	-1.32269	-0.403479	0.382481	0.587904	0.853735	-1.17132	-0.22814	0.617803	0.778702	1.54328	1.54328	0.626	0.184569	0.391766	1.57828	1.57828	0.658353	0.164385	0.364356	1.12923	1.12923
1457782_at	Tln1	talin 1	NM_011602	chr4:43562127-43562691 (-) // 59.51 // qA5 chr4:43531517-43562324 (-) // 98.57 // qA5 c	NCBI 38	101.958	176.21	294.689	95.0343	180.938	185.665	133.732	429.86	98.0158	208.992	318.912	167.342	200.85	253.128	92.3061	171.645	174.289	147.248	239.762	186.939	204.145	125.873	0.726928	-1.37565	-0.460116	0.450745	0.650717	0.614139	-1.6283	-0.703363	0.255921	0.44748	1.48514	1.48514	0.570599	0.352535	0.59397	1.62184	1.62184	0.697631	0.259623	0.491062	0.844841	-1.18365
1441440_at	Atg4c	autophagy related 4C, cysteine peptidase	NM_001145967 /// NM_175029	chr4:99259162-99259787 (+) // 51.89 // qC6 chr4:99225926-99226628 (+) // 56.68 // qC6 c	NCBI 38	20.8954	26.667	27.5512	23.8898	20.1724	24.948	35.0488	69.7726	27.0748	27.891	29.8886	21.3404	26.3642	24.4324	22.6532	29.7606	24.8535	22.9088	49.4514	28.2604	23.9549	25.9649	0.502585	-1.98971	-0.99256	0.00134661	0.00747578	0.463258	-2.15862	-1.11011	0.000554736	0.00367604	1.08841	1.08841	0.122222	0.624415	0.813665	0.92259	-1.08391	-0.116238	0.641324	0.823302	0.92175	-1.08489
1448377_at	Slpi	secretory leukocyte peptidase inhibitor	NM_011414	chr2:164354070-164359414 (-) // 85.06 // qH3 chr2:164354070-164359414 (-) // 85.06 // q	NCBI 38	4913.06	4676.73	2105.04	4944.06	4156.05	1843.88	5700.52	4733.84	3885.55	6619.15	931.204	3693.55	5807.11	642.12	5257.73	1416.8	3643.48	3358.73	5194.61	2882.49	2396.98	2729.27	0.701377	-1.42577	-0.511738	0.60001	0.770619	0.646548	-1.54668	-0.629171	0.520269	0.705486	1.05611	1.05611	0.0787601	0.935316	0.97586	0.878249	-1.13863	-0.187298	0.847081	0.93329	0.921827	-1.0848
1447150_at	Mycbp2	MYC binding protein 2	NM_207215	chr14:103155287-103156498 (-) // 96.5 // qE2.3 chr14:103113410-103123502 (-) // 97.04 /	NCBI 38	43.0152	66.9144	101.914	46.151	63.0379	93.7746	207.654	235.728	52.3381	82.5654	117.629	64.438	85.1862	103.658	111.413	121.354	66.4446	64.857	221.246	79.8074	82.8649	116.278	0.300319	-3.32979	-1.73543	0.000721867	0.00454262	0.293143	-3.4113	-1.77032	0.000614127	0.00397728	0.686352	-1.45698	-0.542979	0.191057	0.400989	0.712649	-1.40321	-0.488736	0.236305	0.462812	0.976106	-1.02448
1423135_at	Thy1	thymus cell antigen 1, theta	NM_009382	chr9:44045678-44048579 (+) // 95.2 // qA5.1 chr9:44045678-44048579 (+) // 95.2 // qA5.1	NCBI 38	1594.79	1868.6	1469.33	1620.78	2879.46	2330.73	2277.35	3074.05	1730.49	3336.33	1224.95	1770.07	3501.09	1868.9	2203.97	877.407	1636.05	2215.63	2645.82	1919.48	2262.5	1390.61	0.618311	-1.61731	-0.693595	0.152394	0.314632	0.8374	-1.19417	-0.256011	0.584119	0.753427	1.38028	1.38028	0.464961	0.326563	0.566649	1.62698	1.62698	0.702197	0.147749	0.339013	1.35433	1.35433
1429504_at	Amy1 /// Rnpc3	amylase 1, salivary /// RNA-binding region (RNP1, RRM) containing 3	NM_001038696 /// NM_001110505 /// NM_007446 /// NM_026043	chr3:113555951-113570058 (-) // 83.99 // qF3 chr3:113605465-113630101 (-) // 96.29 // q	NCBI 38	91.1914	173.806	195.333	131.795	203.033	232.065	98.7044	122.764	91.7085	182.86	219.729	191.332	207.672	244.082	26.332	127.173	145.747	183.806	110.084	154.456	213.256	57.8707	1.32396	1.32396	0.40486	0.480113	0.677261	1.66969	1.66969	0.73958	0.207147	0.386615	2.66899	2.66899	1.41629	0.0246526	0.0889059	3.68505	3.68505	1.88168	0.00500418	0.0259776	1.26113	1.26113
1437658_a_at	Snhg1	small nucleolar RNA host gene (non-protein coding) 1	NR_002896	chr19:8724139-8726443 (+) // 71.48 // qA chr19:8724139-8726443 (+) // 71.48 // qA chr19	NCBI 38	511.4	730.593	678.235	549.034	688.514	756.832	533.938	671.219	316.04	682.816	627.87	560.531	617.526	681.394	324.046	305.804	632.806	658.929	598.655	513.617	617.857	314.793	1.05705	1.05705	0.0800436	0.782283	0.887412	1.10068	1.10068	0.138395	0.63382	0.79054	1.63161	1.63161	0.706296	0.0272692	0.0963921	1.96274	1.96274	0.972869	0.00454499	0.0240987	1.04128	1.04128
1426958_at	Rps9	ribosomal protein S9	NM_029767	chr7:3704336-3706897 (+) // 95.62 // qA1 chr7:3704336-3706897 (+) // 95.62 // qA1 chr7:	NCBI 38	196.993	371.797	460.872	243.316	386.718	452.754	157.797	274.399	177.244	370.853	509.049	295.197	368.234	425.487	67.8667	176.658	323.181	349.261	208.085	322.246	358.965	109.492	1.55312	1.55312	0.635169	0.235554	0.42705	1.67845	1.67845	0.74713	0.167288	0.332064	2.94311	2.94311	1.55734	0.00938775	0.041908	3.27844	3.27844	1.71301	0.00523523	0.0269242	1.0807	1.0807
1441880_x_at	Igflr1 /// U2af1l4	IGF-like family receptor 1 /// U2 small nuclear RNA auxiliary factor 1-like 4	NM_145580 /// NM_170760	chr7:30566079-30567958 (+) // 97.13 // qB1 chr7:30563348-30565552 (+) // 97.64 // qB1 c	NCBI 38	122.891	121.635	203.04	128.675	128.388	206.424	428.434	615.897	102.697	128.358	206.913	135.364	129.682	198.806	319.235	228.951	144.784	150.52	513.685	139.719	151.683	270.349	0.281854	-3.54794	-1.82698	0.000145979	0.00126978	0.29302	-3.41273	-1.77093	0.000193292	0.00159605	0.516808	-1.93496	-0.9523	0.0160645	0.0636548	0.561063	-1.78233	-0.833765	0.0308047	0.106984	1.03962	1.03962
1429883_at	Actl6a	actin-like 6A	NM_019673	chr3:32708675-32726973 (+) // 97.76 // qA3 chr3:32708549-32710006 (+) // 83.92 // qA3 c	NCBI 38	213.797	312.052	358.779	184.297	259.654	245.638	357.57	467.623	128.548	281.424	338.019	218.985	303.409	295.719	159.958	289.573	288.195	227.372	408.91	230.386	269.84	215.22	0.704786	-1.41887	-0.504743	0.209809	0.394817	0.556043	-1.79842	-0.846732	0.0454861	0.124422	1.07047	1.07047	0.0982444	0.801281	0.915926	1.25379	1.25379	0.326296	0.409043	0.646944	0.788953	-1.2675
1428242_at	Hmha1	histocompatibility (minor) HA-1	NM_001142701 /// NM_027521	chr10:80021599-80031470 (+) // 97.41 // qC1 chr10:80021599-80031470 (+) // 97.41 // qC1	NCBI 38	279.28	336.945	536.145	361.756	330.163	514.133	2144.66	3341.12	261.017	259.311	694.481	392.738	318.952	569.526	1742.14	1139.5	369.51	394.524	2676.81	360.896	414.745	1408.95	0.138041	-7.24425	-2.85683	1.92794e-05	0.000260882	0.147385	-6.78496	-2.76234	2.70039e-05	0.000340179	0.256145	-3.90404	-1.96497	0.000600511	0.00462099	0.294363	-3.39716	-1.76433	0.00140305	0.00939557	1.06769	1.06769
1442824_at	8030497I03Rik	RIKEN cDNA 8030497I03 gene	---	chr2:154812242-154813156 (+) // 49.95 // qH1 chr2:154812242-154813156 (+) // 49.95 // q	NCBI 38	36.0441	39.3055	71.9101	33.3694	32.3752	53.5532	93.8343	107.959	50.5111	39.9149	71.5343	51.4846	41.0657	60.6148	58.3355	48.1791	46.7045	38.6774	100.649	52.442	50.4171	53.0147	0.464033	-2.15502	-1.1077	0.00480442	0.020962	0.384279	-2.60227	-1.37977	0.000995558	0.00584797	0.989197	-1.01092	-0.0156702	0.962366	0.986694	0.951004	-1.05152	-0.0724767	0.827403	0.924412	0.828129	-1.20754
1457794_at	Whsc1l1	Wolf-Hirschhorn syndrome candidate 1-like 1 (human)	NM_001001735 /// NM_001081269	chr8:25713406-25714692 (+) // 97.72 // qA2 chr8:25673420-25675032 (+) // 84.58 // qA2 c	NCBI 38	15.4347	16.9969	15.7257	15.0736	13.1918	12.7668	28.3354	69.6983	14.7282	18.1909	15.0875	14.0817	14.6842	14.5924	24.012	22.9021	16.0383	13.6417	44.4401	15.9297	14.4503	23.4504	0.360897	-2.77088	-1.47034	9.89569e-05	0.000937026	0.306967	-3.25768	-1.70384	2.38257e-05	0.000309941	0.67929	-1.47212	-0.5579	0.0557137	0.165978	0.616205	-1.62284	-0.698518	0.0208125	0.0793932	0.850567	-1.17569
1444416_at	Cenpa	centromere protein A	NM_007681	chr5:30677506-30677804 (+) // 40.27 // qB1 --- --- chr5:30666901-30674837 (+) // 92.1 /	NCBI 38	173.562	127.182	161.942	137.526	83.5586	131.672	346.022	182.835	121.741	163.878	134.012	121.733	104.169	124.33	130.516	135.096	152.902	114.804	251.525	138.793	116.388	132.786	0.607898	-1.64501	-0.718099	0.019888	0.0658937	0.456431	-2.19091	-1.13153	0.00108991	0.00629478	1.04524	1.04524	0.0638342	0.816986	0.923892	0.876508	-1.14089	-0.190161	0.494156	0.718771	0.750834	-1.33185
1432022_at	Arhgap31	Rho GTPase activating protein 31	NM_020260	chr16:38623162-38712899 (-) // 92.05 // qB4 chr16:38623162-38712899 (-) // 92.05 // qB4	NCBI 38	43.9428	68.9047	106.051	57.7842	67.8324	119.158	288.866	382.084	59.8183	66.2817	136.997	52.9574	52.4735	103.516	171.278	179.596	68.4781	77.5874	332.221	81.5917	66.0122	175.388	0.206122	-4.85151	-2.27843	0.000222062	0.00177827	0.233541	-4.28191	-2.09825	0.000451671	0.00311338	0.465207	-2.14958	-1.10406	0.0290039	0.101059	0.376379	-2.6569	-1.40974	0.00795276	0.0375068	1.13302	1.13302
1456429_at	Malt1	mucosa associated lymphoid tissue lymphoma translocation gene 1	NM_172833	chr18:65456430-65457239 (+) // 67.28 // qE1 chr18:65478082-65479066 (+) // 68.02 // qE1	NCBI 38	64.0135	61.339	120.364	57.2986	61.8945	86.1211	384.067	366.667	60.3019	54.7905	129.086	73.1678	61.3244	122.187	268.512	146.199	77.8934	67.3446	375.266	75.273	81.8449	198.132	0.207569	-4.81768	-2.26834	0.000135667	0.0011967	0.179458	-5.57234	-2.47828	5.92691e-05	0.000623535	0.379913	-2.63218	-1.39626	0.0058573	0.028871	0.413084	-2.42081	-1.27549	0.0101132	0.0452093	0.86457	-1.15664
1428920_at	Hmg20a	high mobility group 20A	NM_025812	chr9:56418826-56496940 (+) // 98.2 // qB chr9:56418643-56491338 (+) // 71.62 // qB chr9	NCBI 38	200.127	312.054	417.231	263	306.047	303.713	300.175	401.164	182.964	319.929	383.49	254.927	288.455	344.012	141.645	237.007	296.474	290.235	347.031	282.105	293.58	183.231	0.854313	-1.17053	-0.227163	0.519718	0.710296	0.836339	-1.19569	-0.25784	0.466	0.65967	1.53962	1.53962	0.622574	0.0930498	0.242202	1.60224	1.60224	0.68009	0.0693223	0.196715	0.978961	-1.02149
1460379_at	Hoxb4	homeobox B4	NM_010459	chr11:96318696-96321637 (+) // 89.68 // qD chr11:96318696-96321637 (+) // 89.68 // qD c	NCBI 38	406.938	466.435	392.507	399.499	422.094	433.035	400.502	596.586	397.485	479.422	318.356	413.391	474.075	317.86	312.422	213.313	420.773	417.977	488.813	392.933	396.413	258.154	0.860804	-1.1617	-0.216243	0.372356	0.578764	0.855085	-1.16947	-0.22586	0.352073	0.553637	1.52208	1.52208	0.606044	0.0225548	0.0830063	1.53556	1.53556	0.618765	0.0203493	0.0780288	0.993356	-1.00669
1442599_at	Slc12a9	solute carrier family 12 (potassium/chloride transporters), member 9	NM_031406	chr5:137314261-137333597 (-) // 99.34 // qG2 chr5:137329781-137330437 (-) // 14.52 // q	NCBI 38	29.5884	48.2101	57.5581	24.6517	39.4238	31.8002	33.539	79.5589	21.7648	40.9129	60.9412	30.8886	32.6375	52.8122	20.4564	36.3918	43.4631	31.3819	51.6559	37.8594	37.6198	27.2924	0.8414	-1.1885	-0.249136	0.60833	0.776235	0.607517	-1.64604	-0.719003	0.153734	0.312209	1.38718	1.38718	0.472155	0.337455	0.578164	1.3784	1.3784	0.462995	0.346572	0.586806	0.722031	-1.38498
1455987_at	Sec61a1	Sec61 alpha 1 subunit (S. cerevisiae)	NM_016906	chr6:88503602-88518842 (-) // 96.22 // qD1 chr6:88503602-88518842 (-) // 96.22 // qD1 c	NCBI 38	201.568	267.172	318.144	195.604	296.838	353.348	314.568	377.968	134.635	292.817	282.937	248.839	324.043	301.525	170.747	194.485	257.797	273.757	344.813	223.433	289.699	182.23	0.747642	-1.33754	-0.41958	0.225706	0.414831	0.793929	-1.25956	-0.332918	0.331251	0.532156	1.22611	1.22611	0.294088	0.388808	0.630602	1.58975	1.58975	0.6688	0.0637587	0.185008	1.06191	1.06191
1448886_at	Gata3	GATA binding protein 3	NM_008091	chr2:9857777-9878590 (-) // 91.13 // qA1 chr2:9857777-9878590 (-) // 91.13 // qA1	NCBI 38	85.506	109.797	212.394	80.5375	95.3977	159.991	318.435	611.348	104.168	141.761	161.901	70.0073	123.096	202.644	348.607	156.14	125.871	107.123	441.213	133.714	120.423	233.301	0.285283	-3.50529	-1.80953	0.0038883	0.0176124	0.24279	-4.11878	-2.04222	0.00165508	0.00880159	0.573141	-1.74477	-0.803038	0.143397	0.330085	0.516171	-1.93734	-0.954079	0.0871853	0.232829	0.851052	-1.17502
1439808_at	Ipcef1	interaction protein for cytohesin exchange factors 1	NM_001033391 /// NM_001170800 /// NM_001170801 /// NM_001170802	chr10:6885803-6887019 (-) // 99.35 // qA1 chr10:6885803-6887019 (-) // 99.35 // qA1 chr	NCBI 38	39.2437	28.2273	22.3984	33.0296	27.6117	34.6983	1338.75	2470.5	35.931	25.5134	31.3095	32.9427	31.8826	24.049	1346.65	686.897	29.1665	31.6302	1818.58	30.6176	29.3407	961.778	0.0160377	-62.353	-5.96239	1.40217e-10	3.64223e-08	0.0173924	-57.4964	-5.8454	1.79272e-10	4.44249e-08	0.0318345	-31.4125	-4.97327	1.31057e-09	1.90058e-07	0.0305068	-32.7796	-5.03473	1.12775e-09	1.74787e-07	1.08447	1.08447
1457042_at	AI256396	EST AI256396	XR_105003 /// XR_107805	chr6:100810093-100810913 (+) // 95.74 // qD3 chr6:100810093-100810913 (+) // 95.74 // q	NCBI 38	998.615	986.49	1648.25	990.035	980.226	1497.8	63.3078	32.1122	831.661	657.714	1636.46	808.033	751.476	2522.79	33.8946	16.7922	1175.37	1132.74	45.0879	963.747	1152.78	23.8572	26.0683	26.0683	4.70422	1.05317e-06	2.83184e-05	25.1236	25.1236	4.65097	1.19456e-06	3.15433e-05	40.3967	40.3967	5.33617	2.54612e-07	1.06448e-05	48.3194	48.3194	5.59453	1.47885e-07	7.21056e-06	0.963761	-1.0376
1438249_at	Usp7	ubiquitin specific peptidase 7	NM_001003918	chr16:8689601-8690244 (-) // 100.0 // qA1 chr16:8689601-8690244 (+) // 100.0 // qA1 chr	NCBI 38	213.02	364.822	464.702	204.671	360.268	311.745	438.28	853.054	206.546	401.328	451.586	319.923	403.014	372.547	242.154	432.354	330.542	284.333	611.462	334.518	363.51	323.569	0.540574	-1.84988	-0.887436	0.0566862	0.149842	0.465005	-2.15051	-1.10468	0.0219088	0.070388	1.03384	1.03384	0.0480129	0.911558	0.965654	1.12344	1.12344	0.167923	0.698458	0.857237	0.860206	-1.16251
1416121_at	Lox	lysyl oxidase	NM_010728	chr18:52516061-52529760 (-) // 98.14 // qD1 chr18:52516061-52529760 (-) // 98.14 // qD1	NCBI 38	22378.2	22621.6	16913.1	21036.4	21545.9	17036.7	344.955	187.055	18062.7	24443.1	16245.3	17979.4	23573	18107	195.927	92.3329	20456.9	19765.5	254.022	19285.1	19724.5	134.5	80.5339	80.5339	6.33152	5.40462e-11	1.7411e-08	77.809	77.809	6.28187	5.96206e-11	1.90706e-08	143.386	143.386	7.16376	1.15287e-11	5.09762e-09	146.647	146.647	7.1962	1.08916e-11	4.6783e-09	0.966165	-1.03502
1425315_at	Dock7	dedicator of cytokinesis 7	NM_026082	chr4:98992627-98994958 (-) // 96.31 // qC6 chr4:98992627-98994958 (-) // 96.31 // qC6 c	NCBI 38	39.351	42.4524	82.9511	29.78	29.5562	66.2264	67.4527	95.2783	43.0699	39.8389	88.9899	52.7413	38.777	80.8239	29.9445	60.1979	51.7476	38.7733	80.1666	53.4493	54.8812	42.4567	0.645498	-1.54919	-0.631515	0.222952	0.411382	0.483658	-2.06758	-1.04794	0.0535578	0.14125	1.25892	1.25892	0.332187	0.512501	0.735937	1.29264	1.29264	0.370321	0.466219	0.696257	0.749279	-1.33462
1438103_at	Pcdhgc4	protocadherin gamma subfamily C, 4	NM_033582	chr18:37817793-37818555 (+) // 98.05 // qB3 chr18:37817793-37818555 (+) // 98.05 // qB3	NCBI 38	101.28	112.096	94.3372	92.4306	111.927	159.532	131.815	255.928	97.8158	113.966	107.447	100.773	100.839	97.4701	90.0499	105.111	102.313	118.177	183.671	106.201	99.6812	97.2894	0.557046	-1.79519	-0.844132	0.00563781	0.0239314	0.643415	-1.55421	-0.636179	0.0267661	0.0824856	1.0916	1.0916	0.126444	0.627657	0.81569	1.02459	1.02459	0.0350467	0.892598	0.953309	1.15505	1.15505
1428922_at	Tril	TLR4 interactor with leucine-rich repeats	NM_025817	chr6:53815383-53820483 (-) // 97.54 // qB3 chr6:53815383-53820483 (-) // 97.54 // qB3 c	NCBI 38	61.5269	82.463	57.1175	86.2792	98.1853	61.1848	89.3498	96.9563	61.6077	125.091	51.1638	67.2689	148.285	54.9786	61.483	39.5709	66.1757	80.3279	93.0755	73.3289	81.8534	49.3248	0.710989	-1.40649	-0.492101	0.271146	0.470235	0.863039	-1.1587	-0.212502	0.627895	0.786193	1.48665	1.48665	0.572065	0.204495	0.419675	1.65947	1.65947	0.730723	0.111764	0.278643	1.21386	1.21386
1442160_at	Fam19a3	family with sequence similarity 19, member A3	NM_183224	chr3:104767405-104768374 (-) // 50.98 // qF2.2 chr3:104767405-104768374 (-) // 50.98 //	NCBI 38	64.9906	44.8308	55.3243	58.5792	46.4178	46.6507	128.603	164.199	48.0584	47.6952	53.479	48.5774	34.7788	45.8027	94.9903	62.5615	54.4228	50.2454	145.315	49.6754	42.6135	77.0894	0.374515	-2.67012	-1.4169	2.37471e-05	0.000307852	0.345767	-2.89212	-1.53213	1.07257e-05	0.000166351	0.644391	-1.55185	-0.633992	0.0131407	0.0544147	0.552782	-1.80903	-0.855217	0.00194086	0.0122204	0.923239	-1.08314
1444543_at	2810405F15Rik	RIKEN cDNA 2810405F15 gene	NR_033447	chr2:116074619-116075161 (+) // 93.51 // qE5 chr2:116074619-116075161 (+) // 93.51 // q	NCBI 38	84.8578	70.1407	89.2855	81.2969	78.5986	105.613	78.9843	93.1054	72.6726	79.4634	79.7293	87.2871	65.9191	81.6811	53.5159	38.7106	80.9949	87.7064	85.745	77.2129	77.743	45.5128	0.944606	-1.05864	-0.0822154	0.671156	0.818899	1.02288	1.02288	0.0326369	0.86609	0.933536	1.69651	1.69651	0.76257	0.00147331	0.00953614	1.70816	1.70816	0.772443	0.00133662	0.00904603	1.08286	1.08286
1417872_at	Fhl1	four and a half LIM domains 1	NM_001077361 /// NM_001077362 /// NM_010211	chrX:56731760-56793346 (+) // 96.35 // qA6 chrX:56731760-56793346 (+) // 96.35 // qA6 c	NCBI 38	7850.33	6299.17	7411.93	7451.66	6711.26	6685.6	1387.84	1028.65	8430.52	6595.82	6235.77	7921.48	6913.12	6958.47	784.782	512.742	7156.31	6940.39	1194.76	7025.09	7249.67	634.33	5.98961	5.98961	2.58246	1.03778e-08	8.53983e-07	5.80884	5.80884	2.53825	1.27598e-08	1.01675e-06	11.075	11.075	3.46923	2.84179e-10	5.78704e-08	11.429	11.429	3.51463	2.42001e-10	5.33177e-08	0.96982	-1.03112
1433590_at	Herc3	hect domain and RLD 3	NM_028705	chr6:58831516-58904081 (+) // 95.5 // qB3 chr6:58888614-58920394 (+) // 90.9 // qB3 chr	NCBI 38	261.444	192.912	272.149	243.135	177.883	253.11	514.154	679.275	239.039	149.988	224.77	235.147	137.011	246.312	287.95	341.951	239.435	222.044	590.982	200.49	199.465	313.793	0.405147	-2.46824	-1.30348	0.000554615	0.00369261	0.37572	-2.66156	-1.41227	0.000281145	0.00214152	0.638926	-1.56513	-0.646279	0.041921	0.134329	0.635654	-1.57318	-0.653686	0.0399688	0.130569	0.927365	-1.07832
1437862_at	Rbm25	RNA binding motif protein 25	NM_027349	chr12:83632220-83663312 (+) // 99.33 // qD1 chr12:83632220-83663312 (+) // 99.33 // qD1	NCBI 38	522.6	837.996	965.468	461.988	733.591	590.389	410.627	737.637	444.396	816.744	934.981	805.589	842.147	754.85	226.22	378.65	750.553	584.877	550.359	697.515	800.058	292.676	1.36376	1.36376	0.44759	0.245995	0.440175	1.06272	1.06272	0.0877615	0.815296	0.905615	2.38323	2.38323	1.25292	0.00478766	0.0245373	2.73358	2.73358	1.45079	0.0017283	0.0111658	0.779261	-1.28327
1455831_at	Fus	fused in sarcoma	NM_139149	chr7:127967504-127982032 (+) // 84.47 // qF3 chr7:127967504-127982032 (+) // 84.47 // q	NCBI 38	434.922	1059.67	1676.93	315.852	719.962	754.327	582.415	1898.86	344.297	1017.89	1347.01	648.365	1116.72	1096.49	369.516	846.559	917.713	555.649	1051.62	778.649	925.995	559.316	0.87264	-1.14595	-0.196541	0.786976	0.890028	0.52836	-1.89265	-0.920407	0.218993	0.40174	1.39215	1.39215	0.477315	0.514596	0.737211	1.65559	1.65559	0.727345	0.326003	0.566026	0.605473	-1.6516
1419473_a_at	Cck	cholecystokinin	NM_031161	chr9:121489823-121494840 (-) // 93.27 // qF4 chr9:121489823-121494840 (-) // 93.27 // q	NCBI 38	7002.83	3228.56	3078.29	5319.59	1637.24	3256.65	38.286	31.5185	9372.9	4029.91	3239.16	5999.61	2347.08	2052.28	32.3564	10.5578	4113.36	3049.59	34.7372	4964.39	3068.67	18.4825	118.412	118.412	6.88767	1.05907e-07	4.98071e-06	87.7919	87.7919	6.45602	2.23478e-07	8.90377e-06	268.601	268.601	8.06932	1.64161e-08	1.25702e-06	166.033	166.033	7.37533	4.76153e-08	2.87957e-06	0.74141	-1.34878
1430386_at	E030024N20Rik	peptidylprolyl isomerase A pseudogene 8	NR_033228	chr19:16168425-16170456 (+) // 86.51 // qA chr19:16168425-16170456 (+) // 86.51 // qA	NCBI 38	32.8556	39.9861	56.7622	35.2096	33.8519	32.0711	60.7671	88.9301	39.0444	42.8116	45.3515	40.5204	46.1275	36.8143	41.6029	36.8143	42.0913	33.6863	73.5121	42.3224	40.9778	39.1353	0.572577	-1.74649	-0.804458	0.00248662	0.0122308	0.458241	-2.18226	-1.12582	0.000164566	0.00140544	1.08144	1.08144	0.112954	0.607764	0.803143	1.04708	1.04708	0.0663717	0.762151	0.891715	0.800313	-1.24951
1438234_at	Wdr26	WD repeat domain 26	NM_145514	chr1:181173829-181211395 (-) // 93.38 // qH4 chr1:181173829-181211395 (-) // 93.38 // q	NCBI 38	239.041	311.684	381.841	237.626	309.074	374.43	323.11	268.177	224.359	235.794	400.104	350.037	288.047	380.885	122.147	201.235	305.274	301.836	294.365	276.618	337.382	156.781	1.03706	1.03706	0.0524994	0.864109	0.933404	1.02538	1.02538	0.0361587	0.906102	0.95434	1.76436	1.76436	0.819145	0.0175136	0.0682487	2.15194	2.15194	1.10564	0.00283856	0.0165446	0.988742	-1.01139
1424252_at	Hnrpdl	heterogeneous nuclear ribonucleoprotein D-like	NM_016690	chr5:100033897-100034334 (-) // 100.0 // qE4 chr5:100034518-100038869 (-) // 97.61 // q	NCBI 38	1354.8	2340.77	2555.22	1663.33	2298.08	2608.28	2335.52	2534.96	939.454	2319.17	2890.18	2103.27	2561.83	2601.73	1025.18	1639.53	2008.5	2152.21	2433.13	1846.66	2411.14	1296.4	0.825482	-1.21141	-0.276691	0.514408	0.705845	0.884542	-1.13053	-0.176997	0.675099	0.819388	1.42435	1.42435	0.510304	0.23834	0.464454	1.85983	1.85983	0.895171	0.0494168	0.152947	1.07155	1.07155
1437589_x_at	Zgpat	zinc finger, CCCH-type with G patch domain	NM_001048148 /// NM_144894	chr2:181365392-181380786 (+) // 98.16 // qH4 chr2:181382981-181383627 (+) // 91.38 // q	NCBI 38	182.89	171.581	214.775	176.55	189.111	239.727	420.892	683.501	158.269	213.991	229.261	196.869	205.117	250.871	352.538	231.952	188.895	200.039	536.365	198.022	216.379	285.962	0.352176	-2.83949	-1.50563	4.4219e-05	0.000498718	0.372953	-2.68131	-1.42293	7.59672e-05	0.000760025	0.692479	-1.44409	-0.530158	0.0536297	0.161283	0.756675	-1.32157	-0.402254	0.131265	0.311405	1.05899	1.05899
1435060_at	Tmod2	tropomodulin 2	NM_001038710 /// NM_016711	chr9:75581162-75611177 (-) // 88.8 // qD chr9:75573926-75599113 (-) // 93.14 // qD chr9	NCBI 38	40.7396	50.9301	56.2971	42.058	44.0255	74.1942	39.6941	47.1107	61.3617	50.6203	50.5649	39.1191	47.1969	74.1868	27.1568	19.5925	48.883	51.599	43.2438	53.9541	51.5478	23.0665	1.13041	1.13041	0.176846	0.554642	0.736447	1.19321	1.19321	0.254848	0.398024	0.597858	2.33905	2.33905	1.22592	0.00105419	0.00730897	2.23473	2.23473	1.1601	0.00160512	0.0104886	1.05556	1.05556
1456296_at	5830418K08Rik	RIKEN cDNA 5830418K08 gene	NM_176976	chr9:15316914-15317957 (-) // 87.57 // qA2 chr9:15344657-15345371 (-) // 58.88 // qA2 c	NCBI 38	22.1019	37.9853	50.769	24.2688	29.3864	28.3521	35.4433	65.1106	26.6797	36.3342	43.9628	28.1514	30.4103	37.9494	23.1449	28.384	34.9313	27.2433	48.0389	34.9296	31.9085	25.6309	0.727147	-1.37524	-0.459681	0.191728	0.371041	0.56711	-1.76333	-0.818299	0.029237	0.0882903	1.36279	1.36279	0.446563	0.203878	0.418778	1.24493	1.24493	0.316065	0.360881	0.601527	0.779911	-1.2822
1439805_at	Nfat5	nuclear factor of activated T cells 5	NM_018823 /// NM_133957	chr8:107338507-107379508 (+) // 98.95 // qD3 chr8:107378800-107379506 (+) // 99.85 // q	NCBI 38	82.2761	103.142	203.528	55.8541	77.5009	92.1998	105.215	181.931	102.824	103.468	143.024	89.5626	83.1792	97.5478	88.7868	61.435	119.981	73.6258	138.348	115.018	89.9044	73.8553	0.867238	-1.15309	-0.2055	0.574301	0.751183	0.532179	-1.87907	-0.910017	0.0242812	0.0764098	1.55734	1.55734	0.639084	0.0966852	0.249191	1.2173	1.2173	0.283685	0.440758	0.674263	0.613648	-1.6296
1442017_at	LOC101056574 /// Nfs1	cysteine desulfurase, mitochondrial-like /// nitrogen fixation gene 1 (S. cerevisiae)	NM_010911 /// XM_003946178	chr2:156123648-156144187 (-) // 98.22 // qH1 chr2:156141786-156144180 (-) // 75.18 // q	NCBI 38	91.1606	103.021	121.494	85.1774	103.298	81.7442	129.958	186.553	82.0291	115.594	121.929	93.9698	113.883	94.2665	80.7456	85.6599	104.492	89.5965	155.706	104.963	100.291	83.1647	0.671089	-1.49012	-0.575424	0.0165404	0.0568459	0.575422	-1.73785	-0.797308	0.00217961	0.0109973	1.26211	1.26211	0.335838	0.132318	0.31251	1.20593	1.20593	0.270146	0.218693	0.439931	0.857446	-1.16625
1438641_x_at	Fam57b	family with sequence similarity 57, member B	NM_001146347 /// NM_026884 /// NM_029978	chr7:126829915-126830214 (+) // 97.99 // qF3 chr7:126829915-126830214 (+) // 97.99 // q	NCBI 38	69.6332	60.7524	238.295	69.0985	79.8513	195.485	444.733	530.24	60.0704	62.2187	230.286	62.3689	88.078	362.467	339.941	197.945	100.27	102.555	485.595	95.1222	125.805	259.41	0.206488	-4.84289	-2.27587	0.0152774	0.0534377	0.211196	-4.73495	-2.24335	0.0164851	0.0563167	0.366688	-2.72711	-1.44738	0.0990192	0.253521	0.484966	-2.062	-1.04404	0.22226	0.444945	1.0228	1.0228
1458084_at	Zdhhc17	zinc finger, DHHC domain containing 17	NM_172554	chr10:110941778-110942658 (-) // 87.56 // qD1 chr10:110941781-110942069 (-) // 95.49 //	NCBI 38	103.965	87.2082	145.672	103.622	111.555	120.981	222.753	328.631	93.2182	98.6824	122.208	100.383	117.978	134.422	127.922	163.419	109.717	111.829	270.561	103.979	116.765	144.586	0.405516	-2.46599	-1.30217	9.33599e-05	0.00089645	0.413321	-2.41943	-1.27467	0.000113823	0.00104575	0.719152	-1.39053	-0.475631	0.0627421	0.181256	0.807579	-1.23827	-0.308325	0.209619	0.427481	1.01925	1.01925
1445711_at	BB163080	expressed sequence BB163080	---	chr16:23236286-23236529 (+) // 100.0 // qB1 chr16:23236286-23236529 (+) // 100.0 // qB1	NCBI 38	15.4266	16.2104	24.5367	15.8867	14.3487	22.3738	42.2899	42.1345	14.4868	17.3771	22.5978	17.6475	19.5242	25.7069	23.2824	21.862	18.3073	17.2132	42.212	17.8513	20.6904	22.561	0.4337	-2.30574	-1.20523	0.000411098	0.00291021	0.407779	-2.45231	-1.29414	0.000222117	0.00177399	0.791249	-1.26383	-0.337796	0.208691	0.425253	0.917087	-1.09041	-0.124869	0.632882	0.817974	0.940232	-1.06357
1439477_at	5430406J06Rik	RIKEN cDNA 5430406J06 gene	---	chr11:51993566-51994493 (-) // 72.66 // qB1.3 chr11:51993566-51994493 (-) // 72.66 // q	NCBI 38	382.055	529.472	590.647	308.719	509.626	522.382	573.309	937.247	220.446	559.924	608.524	419.017	633.639	525.36	299.21	513.775	492.531	434.779	733.031	421.927	518.611	392.079	0.671909	-1.4883	-0.573662	0.19967	0.381517	0.593124	-1.68599	-0.753594	0.0993744	0.226105	1.07612	1.07612	0.105839	0.806945	0.918554	1.32272	1.32272	0.403508	0.359131	0.599269	0.882745	-1.13283
1453745_at	2700038G22Rik	RIKEN cDNA 2700038G22 gene	NR_045040 /// NR_045042	chr5:23850596-23854979 (+) // 50.8 // qA3 chr5:23850596-23854979 (+) // 50.8 // qA3	NCBI 38	344.981	405.384	465.874	299.403	344.765	437.886	415.647	424.871	261.974	397.424	439.781	358.125	388.51	517.965	242.981	207.955	402.418	356.244	420.255	357.778	416.147	224.794	0.957554	-1.04433	-0.0625742	0.797689	0.896003	0.847684	-1.17968	-0.238402	0.337308	0.538682	1.59158	1.59158	0.67046	0.0150994	0.0606573	1.85123	1.85123	0.888484	0.00264688	0.0156375	0.885259	-1.12961
1449750_at	AA407331	expressed sequence AA407331	---	chr18:76291608-76291970 (-) // 23.76 // qE3 chr18:76291608-76291970 (+) // 23.76 // qE3	NCBI 38	98.2355	82.1883	158.36	87.8716	73.6272	89.2704	182.283	193.425	89.3695	97.2045	127.372	132.405	95.1318	157.471	69.9847	144.377	108.538	83.2795	187.775	103.42	125.645	100.519	0.578019	-1.73005	-0.790811	0.0303859	0.0923411	0.443505	-2.25476	-1.17298	0.00323833	0.0151506	1.02885	1.02885	0.0410327	0.901148	0.961457	1.24995	1.24995	0.32187	0.340429	0.580347	0.767285	-1.3033
1431909_at	Zc3hav1	zinc finger CCCH type, antiviral 1	NM_028421 /// NM_028864	chr6:38315667-38354862 (-) // 94.56 // qB1 chr6:38352424-38354281 (-) // 76.28 // qB1 c	NCBI 38	72.6601	62.8555	61.1046	57.4681	59.5097	47.8332	166.815	182.072	74.2307	72.1867	67.4105	67.895	66.443	55.1147	124.016	70.205	65.3489	54.6909	174.277	71.218	62.8809	93.3087	0.374971	-2.66687	-1.41515	1.09174e-05	0.000167593	0.313816	-3.18658	-1.67201	1.85316e-06	4.40122e-05	0.76325	-1.31019	-0.389772	0.0786351	0.214175	0.6739	-1.4839	-0.569394	0.0154331	0.062951	0.836906	-1.19488
1446618_at	A130088B03Rik	RIKEN cDNA A130088B03 gene	---	chr15:85680195-85680835 (+) // 92.36 // qE2 chr15:85680195-85680835 (+) // 92.36 // qE2	NCBI 38	266.843	315.328	322.667	244.335	298.568	380.654	264.823	288.61	220.389	362.606	254.536	309.269	354.743	255.297	144.682	151.45	300.558	302.825	276.461	272.976	303.695	148.03	1.08717	1.08717	0.120578	0.602345	0.772204	1.09536	1.09536	0.131405	0.57052	0.743069	1.84405	1.84405	0.882878	0.00182212	0.0113333	2.05157	2.05157	1.03673	0.000518308	0.00425331	1.00754	1.00754
1439276_at	Adar	adenosine deaminase, RNA-specific	NM_001038587 /// NM_001146296 /// NM_019655	chr3:89730810-89751175 (+) // 99.18 // qF1 chr3:89750936-89753449 (+) // 99.34 // qF1 c	NCBI 38	45.0115	59.1707	103.126	42.7599	53.9003	79.2149	97.9426	131.303	40.6799	67.5765	105.877	55.9521	55.0508	111.108	39.184	94.2299	65.0028	56.73	113.403	66.2712	69.948	60.7642	0.573204	-1.74458	-0.802879	0.129967	0.280502	0.500252	-1.99899	-0.999273	0.0654829	0.164936	1.09063	1.09063	0.125162	0.804874	0.917704	1.15114	1.15114	0.203063	0.689151	0.851778	0.872729	-1.14583
1417343_at	Fxyd6	FXYD domain-containing ion transport regulator 6	NM_022004	chr9:45370198-45396159 (+) // 96.88 // qA5.2 chr9:45370198-45396159 (+) // 96.88 // qA5	NCBI 38	203.312	337.436	204.194	285.618	448.545	345.033	309.041	499.961	224.524	507.671	132.532	224.696	771.195	128.171	186.181	238.308	241.067	353.584	393.075	247.208	281.098	210.638	0.613282	-1.63057	-0.705377	0.294477	0.496016	0.899535	-1.11169	-0.152749	0.816601	0.906216	1.17361	1.17361	0.230953	0.726289	0.874786	1.33451	1.33451	0.41631	0.530275	0.747185	1.46675	1.46675
1438831_at	Cdk12	cyclin-dependent kinase 12	NM_001109626 /// NM_001109628 /// NM_026952	chr11:98202444-98246703 (+) // 99.14 // qD chr11:98202444-98246703 (+) // 99.14 // qD c	NCBI 38	85.4898	102.553	127.965	84.2796	86.1503	121.063	150.333	195.178	92.6637	88.1838	141.31	104.673	92.7366	126.551	78.7033	107.366	103.908	95.7911	171.289	104.907	107.098	91.9202	0.60662	-1.64848	-0.721135	0.0155757	0.0542538	0.559235	-1.78816	-0.838473	0.00654469	0.0267827	1.14129	1.14129	0.190665	0.474618	0.706437	1.16512	1.16512	0.220479	0.410052	0.647858	0.921887	-1.08473
1444972_at	C77626	expressed sequence C77626	---	chr16:35995216-35996114 (+) // 25.7 // qB3 chr16:35995216-35996114 (+) // 25.7 // qB3	NCBI 38	15.3819	16.8209	17.7035	15.0371	16.8077	16.2142	27.1146	47.8866	15.6699	15.2722	17.9188	13.3436	15.0067	18.8354	16.9135	22.1152	16.6076	16.0026	36.0336	16.2465	15.566	19.3402	0.46089	-2.16972	-1.11751	0.000214727	0.0017309	0.444101	-2.25174	-1.17104	0.000141005	0.00124281	0.840035	-1.19043	-0.251479	0.272879	0.506694	0.804851	-1.24247	-0.313206	0.177507	0.383546	0.963573	-1.0378
1448416_at	Mgp	matrix Gla protein	NM_008597	chr15:98845733-98849237 (-) // 62.02 // qF1 chr15:98845733-98849237 (-) // 62.02 // qF1	NCBI 38	21203.1	17429.8	10311	23467.8	18496.2	15863.7	4616.69	2247.07	20847.7	18919.3	7555.93	23158.7	20884.7	10551.7	3320.02	900.61	15617.8	19023.6	3220.57	14389.2	17216.4	1729.09	4.84949	4.84949	2.27783	0.00185668	0.00966617	5.90663	5.90663	2.56234	0.000751283	0.00466267	8.32173	8.32173	3.05688	0.000166628	0.00167299	9.95646	9.95646	3.31563	7.87718e-05	0.00094713	1.21799	1.21799
1429563_x_at	Sp110	Sp110 nuclear body protein	NM_030194 /// NM_175397	chr1_GL456212_random:128551-150746 (-) // 74.27 // chr1_GL456212_random:128551-150746 (	NCBI 38	176.457	166.738	282.251	191.54	186.121	208.81	372.75	910.571	178.422	168.751	280.459	220.536	160.979	264.624	230.912	424.126	202.506	195.256	582.579	203.636	211.006	312.948	0.347601	-2.87686	-1.5245	0.00171072	0.00903775	0.335156	-2.98369	-1.5771	0.0013263	0.00738033	0.650705	-1.5368	-0.619924	0.132897	0.313556	0.674252	-1.48313	-0.56864	0.165158	0.36537	0.964197	-1.03713
1448759_at	Il2rb	interleukin 2 receptor, beta chain	NM_008368	chr15:78480460-78495066 (-) // 99.5 // qE1 chr15:78480460-78495066 (-) // 99.5 // qE1 c	NCBI 38	45.1591	45.692	40.7296	53.4976	39.9974	30.6716	1886.94	3009.72	42.9869	42.5849	39.5153	41.0722	43.616	35.5329	2047.76	802.916	43.8025	40.3367	2383.06	41.6663	39.9278	1282.2	0.0183809	-54.4043	-5.76565	2.39362e-10	5.25171e-08	0.0169266	-59.0787	-5.88456	1.85908e-10	4.53224e-08	0.0324952	-30.7738	-4.94363	1.58548e-09	2.21589e-07	0.0311392	-32.1139	-5.00512	1.36331e-09	1.96517e-07	0.920879	-1.08592
1430357_at	H3f3b	H3 histone, family 3B	NM_008211	chr11:116020927-116022253 (-) // 77.15 // qE2 chr11:116020927-116022253 (-) // 77.15 //	NCBI 38	831.723	1160.05	902.571	861.239	789.554	1360.52	1049.88	1635.97	463.96	1186.96	1139.56	1235.25	656.959	1185.98	451.314	1101.92	954.949	974.386	1310.59	856.168	987.338	705.201	0.728641	-1.37242	-0.45672	0.345017	0.55078	0.743471	-1.34504	-0.427652	0.375587	0.576409	1.21407	1.21407	0.279852	0.558505	0.769052	1.40007	1.40007	0.485499	0.316566	0.555889	1.02035	1.02035
1435399_at	Synpo2	synaptopodin 2	NM_080451	chr3:123076518-123078208 (-) // 94.91 // qG1 chr3:123076518-123078208 (-) // 94.91 // q	NCBI 38	40.7584	58.5632	61.2905	46.5573	57.2418	50.7614	166.706	94.9711	63.4977	71.3125	37.6524	54.999	68.0003	42.8728	125.134	36.6336	52.6919	51.3346	125.826	55.4506	54.3271	67.7064	0.418768	-2.38796	-1.25578	0.013801	0.049232	0.407981	-2.4511	-1.29343	0.0117229	0.0429326	0.818987	-1.22102	-0.288088	0.524824	0.744764	0.802394	-1.24627	-0.317617	0.483987	0.710719	0.974241	-1.02644
1455044_at	Tmem44	transmembrane protein 44	NM_172614	chr16:30510106-30510755 (-) // 100.0 // qB2 chr16:30513251-30540775 (-) // 94.85 // qB2	NCBI 38	61.9187	60.2278	71.7211	40.8612	70.732	108.085	617.375	1065.18	52.6386	54.2986	57.3957	63.5017	61.8276	87.3628	421.723	451.736	64.43	67.852	810.934	54.7425	69.9999	436.47	0.0794517	-12.5863	-3.65378	5.34307e-08	2.97137e-06	0.0836716	-11.9515	-3.57912	6.80513e-08	3.63217e-06	0.12542	-7.97318	-2.99516	5.26733e-07	1.8288e-05	0.160377	-6.23531	-2.64046	2.12837e-06	5.52948e-05	1.05311	1.05311
1437180_at	Snrnp48	small nuclear ribonucleoprotein 48 (U11/U12)	NM_026382	chr13:38204944-38227048 (+) // 99.74 // qA3.3 chr13:38204966-38227051 (+) // 94.84 // q	NCBI 38	352.859	462.631	653.491	349.556	483.37	651.132	379.252	610.99	263.027	507.473	671.598	442.394	484.545	620.819	175.548	382.745	474.268	479.169	481.373	447.548	510.529	259.21	0.985245	-1.01498	-0.0214456	0.961313	0.982534	0.995422	-1.0046	-0.00661982	0.988054	0.994693	1.72659	1.72659	0.787926	0.0925734	0.241199	1.96956	1.96956	0.977873	0.0422084	0.135906	1.01033	1.01033
1458148_at	Nlrc3	NLR family, CARD domain containing 3	NM_001081280 /// NM_175547	chr16:3948869-3954639 (-) // 97.62 // qA1 chr16:3945006-3945661 (-) // 50.23 // qA1 chr	NCBI 38	86.2819	116.64	206.369	97.5164	128.698	247.555	200.043	480.041	94.9932	127.403	182.074	115.407	127.501	187.642	162.696	171.443	127.586	145.918	309.885	130.129	140.289	167.012	0.41172	-2.42884	-1.28026	0.017763	0.0602261	0.470876	-2.1237	-1.08658	0.038443	0.109203	0.779157	-1.28344	-0.360014	0.458646	0.692329	0.839995	-1.19048	-0.251547	0.602564	0.798502	1.14368	1.14368
1441660_at	Actr2	ARP2 actin-related protein 2	NM_146243	--- --- chr11:20062303-20112913 (-) // 95.2 // qA3.1	NCBI 38	57.8246	54.7604	132.446	54.4734	54.8428	134.723	93.4753	167.964	57.75	58.5527	130.167	72.0226	58.9279	142.831	57.4887	79.3306	74.8515	73.8323	125.3	76.0671	84.6319	67.532	0.597381	-1.67397	-0.743277	0.194683	0.374975	0.589243	-1.69709	-0.763065	0.183827	0.355598	1.12639	1.12639	0.171706	0.757021	0.891796	1.25321	1.25321	0.325628	0.559307	0.769332	0.986377	-1.01381
1455694_at	Nbeal2	neurobeachin-like 2	NM_183276	chr9:110624792-110628750 (-) // 96.02 // qF2 chr9:110624792-110628750 (-) // 96.02 // q	NCBI 38	184.877	193.36	277.847	203.886	129.618	292.1	879.821	1676.37	201.824	127.922	409.125	249.195	132.1	393.888	658.735	650.943	214.956	197.634	1214.46	219.411	234.93	654.827	0.176999	-5.64976	-2.49819	0.000348246	0.00254476	0.162735	-6.14498	-2.6194	0.000230695	0.00183029	0.335067	-2.98448	-1.57748	0.00957382	0.0425492	0.358766	-2.78733	-1.47888	0.0137692	0.057511	0.919411	-1.08765
1427500_at	Spcs1	signal peptidase complex subunit 1 homolog (S. cerevisiae)	NM_026911	chr14:30999825-31001672 (-) // 95.82 // qB chr14:30999826-31000927 (-) // 77.63 // qB c	NCBI 38	62.5878	112.408	83.5088	76.2938	122.685	118.02	68.7389	86.4124	65.0128	108.112	124.434	113.378	118.865	108.797	27.6352	62.5254	83.7542	103.391	77.0765	95.6445	113.606	41.568	1.08664	1.08664	0.119874	0.746037	0.866151	1.34141	1.34141	0.42375	0.263854	0.457269	2.30092	2.30092	1.20221	0.00565895	0.0280528	2.73301	2.73301	1.45049	0.00154319	0.0101605	1.23446	1.23446
1434031_at	Zfp692	zinc finger protein 692	NM_001040686 /// NM_182996	chr11:58310983-58314613 (+) // 95.84 // qB1.3 chr11:58310983-58314613 (+) // 95.84 // q	NCBI 38	426.466	470.809	567.924	437.816	449.02	619.289	460.008	680.992	354.673	536.472	644.574	492.884	522.696	659.443	264.205	344.957	484.919	495.623	559.704	496.844	553.846	301.894	0.866385	-1.15422	-0.20692	0.453577	0.653133	0.88551	-1.12929	-0.175419	0.523851	0.708199	1.64575	1.64575	0.718745	0.018877	0.0724389	1.83457	1.83457	0.875442	0.00616759	0.0306551	1.02208	1.02208
1436244_a_at	Tle2	transducin-like enhancer of split 2, homolog of Drosophila E(spl)	NM_001252401 /// NM_019725	chr10:81587455-81590473 (+) // 99.9 // qC1 chr10:81587455-81590473 (+) // 99.9 // qC1	NCBI 38	275.516	294.663	428.238	288.334	331.34	402.511	326.667	559.508	219.456	384.567	371.569	347.857	391.952	320.054	163.924	324.388	326.373	337.569	427.515	315.339	352.061	230.595	0.76342	-1.3099	-0.389451	0.266254	0.464341	0.789607	-1.26645	-0.340793	0.32766	0.528559	1.3675	1.3675	0.451541	0.201059	0.415324	1.52674	1.52674	0.610454	0.0918264	0.241795	1.0343	1.0343
1427183_at	Efemp1	epidermal growth factor-containing fibulin-like extracellular matrix protein 1	NM_146015	chr11:28853243-28926741 (+) // 97.59 // qA3.3 chr11:28853243-28926741 (+) // 97.59 // q	NCBI 38	5251.2	6608.82	4241.16	7199.55	8504.47	5255.77	3195.73	2123.08	4441.36	9325.34	4369.08	5116.13	9309.11	5895.9	2188.23	903.202	5279.92	6852.43	2604.7	5656.13	6548.28	1405.82	2.02699	2.02699	1.01934	0.0319487	0.0960611	2.6308	2.6308	1.3955	0.00590302	0.0246488	4.02331	4.02331	2.00838	0.000398765	0.00333799	4.65798	4.65798	2.2197	0.000166224	0.00170855	1.29788	1.29788
1440838_at	Kcnb1	potassium voltage gated channel, Shab-related subfamily, member 1	NM_008420	chr2:167102017-167190155 (-) // 93.57 // qH3 chr2:167102017-167190155 (-) // 93.57 // q	NCBI 38	116.901	92.8425	113.413	132.713	114.569	89.9381	556.087	828.739	101.562	96.8227	85.214	106.449	113.544	73.9925	407.87	329.182	107.171	110.997	678.86	94.278	96.3451	366.419	0.157869	-6.33438	-2.6632	4.11069e-08	2.44965e-06	0.163505	-6.11601	-2.61259	5.15118e-08	2.91864e-06	0.257295	-3.88659	-1.9585	1.37719e-06	3.83175e-05	0.262937	-3.80319	-1.92721	1.64389e-06	4.53462e-05	1.0357	1.0357
1431347_at	5730407M17Rik	RIKEN cDNA 5730407M17 gene	---	chr2:34871107-34872433 (+) // 97.14 // qB chr2:34871107-34872433 (+) // 97.14 // qB	NCBI 38	137.373	119.583	125.258	132.017	111.844	92.9407	125.545	176.471	130.11	131.874	104.395	96.6646	134.682	105.173	95.5861	67.5323	127.192	111.126	148.845	121.446	111.043	80.3441	0.854523	-1.17024	-0.226809	0.316226	0.519833	0.746587	-1.33943	-0.421618	0.074826	0.182447	1.51157	1.51157	0.596048	0.0169822	0.0665779	1.3821	1.3821	0.466862	0.0515011	0.157678	0.873688	-1.14457
1442292_at	Arhgef6	Rac/Cdc42 guanine nucleotide exchange factor (GEF) 6	NM_152801	chrX:57231486-57281594 (-) // 95.63 // qA6 chrX:57272227-57272849 (-) // 36.5 // qA6 ch	NCBI 38	20.1854	20.6667	21.9923	19.8462	13.8932	16.7695	63.5136	27.0088	21.8891	16.208	23.0499	19.7748	18.9495	23.2866	29.0292	17.2253	20.9325	16.6582	41.4141	20.1457	20.5858	22.3596	0.505445	-1.97846	-0.984374	0.00804264	0.0318688	0.402235	-2.48611	-1.31389	0.00110479	0.00635876	0.90099	-1.10989	-0.150417	0.640205	0.823908	0.920671	-1.08616	-0.119242	0.710608	0.863975	0.795804	-1.25659
1436631_at	Ctnna1	catenin (cadherin associated protein), alpha 1	NM_009818	chr18:35182490-35183157 (+) // 49.49 // qB1 chr18:35182490-35183157 (+) // 49.49 // qB1	NCBI 38	27.1383	41.8843	86.5613	32.7008	31.4422	60.0527	139.647	224.035	39.9772	49.911	62.2137	43.5569	49.351	77.3885	72.6719	125.793	46.1657	39.5246	176.878	49.8845	54.9973	95.612	0.261003	-3.83138	-1.93786	0.00101881	0.00598611	0.223457	-4.47514	-2.16193	0.000418715	0.00293282	0.521739	-1.91667	-0.9386	0.0618012	0.17914	0.575217	-1.73847	-0.797822	0.105914	0.268105	0.856148	-1.16802
1446023_at	Ostf1	osteoclast stimulating factor 1	NM_017375	chr19:18580999-18585046 (-) // 94.24 // qB chr19:18580999-18585046 (-) // 94.24 // qB c	NCBI 38	38.186	36.9051	38.0385	40.4216	40.4994	46.0524	58.0915	109.11	34.536	37.4702	54.3693	37.0755	40.5217	59.4473	41.7045	44.5061	37.6929	42.2257	79.6002	41.2691	44.6844	43.0682	0.473525	-2.11182	-1.07849	0.00137795	0.0076179	0.53047	-1.88512	-0.914657	0.00442864	0.019494	0.958228	-1.04359	-0.0615591	0.82029	0.925269	1.03753	1.03753	0.0531531	0.844454	0.931997	1.12026	1.12026
1433338_at	6720460K10Rik	RIKEN cDNA 6720460K10 gene	---	chr2:59683730-59684789 (-) // 93.3 // qC1.1 chr2:59683730-59684789 (+) // 93.3 // qC1.1	NCBI 38	70.587	61.152	91.3434	58.7227	61.9175	74.4483	138.653	181.225	63.3913	58.0845	68.2617	63.5838	67.2615	68.2272	109.055	67.5566	73.3284	64.6882	158.517	63.1088	66.3268	85.8336	0.46259	-2.16174	-1.11219	0.000196541	0.00161197	0.408085	-2.45047	-1.29306	4.83831e-05	0.000533658	0.735245	-1.36009	-0.443703	0.0612211	0.177874	0.77274	-1.2941	-0.371945	0.109519	0.274717	0.882173	-1.13356
1444184_at	Alkbh3	alkB, alkylation repair homolog 3 (E. coli)	NM_026944	chr2:93980549-94010727 (-) // 97.76 // qE1 chr2:94000685-94001344 (-) // 59.58 // qE1 c	NCBI 38	175.891	206.781	193.176	173.172	185.586	218.066	197.811	366.804	140.11	215.354	254.119	221.235	229.571	253.648	108.543	196.817	191.529	191.369	269.365	197.191	234.423	146.162	0.71104	-1.40639	-0.491997	0.127202	0.275747	0.710441	-1.40758	-0.493213	0.126348	0.270452	1.34913	1.34913	0.432029	0.176031	0.379418	1.60387	1.60387	0.681557	0.0419273	0.135262	0.999159	-1.00084
1440609_at	Map4k4	mitogen-activated protein kinase kinase kinase kinase 4	NM_001252200 /// NM_001252201 /// NM_001252202 /// NM_008696	chr1:39901169-40025272 (+) // 96.84 // qB chr1:40025149-40026310 (+) // 94.9 // qB chr1	NCBI 38	310.285	439.477	479.803	277.743	351.257	360.532	289.009	389.396	220.976	437.334	357.31	347.539	476.767	345.044	172.618	191.986	402.954	327.645	335.47	325.639	385.236	182.045	1.20116	1.20116	0.264428	0.361404	0.567182	0.976679	-1.02388	-0.0340436	0.90491	0.953853	1.78879	1.78879	0.838984	0.0102988	0.0449951	2.11617	2.11617	1.08146	0.0019703	0.0123656	0.813112	-1.22984
1430705_at	Puf60	poly-U binding splicing factor 60	NM_001164600 /// NM_028364 /// NM_133691	chr15:76070189-76075835 (-) // 86.54 // qD3 chr15:76079875-76080882 (-) // 98.44 // qD3	NCBI 38	130.691	130.013	139.764	107.606	136.398	125.185	169.405	391.517	102.035	133.508	141.823	118.874	143.197	130.972	146.36	133.503	133.416	122.482	257.536	124.547	130.637	139.783	0.518048	-1.93032	-0.948842	0.00369305	0.0169045	0.475593	-2.10264	-1.0722	0.00154791	0.00834861	0.891	-1.12233	-0.166503	0.545457	0.759092	0.934565	-1.07002	-0.0976331	0.721676	0.869834	0.918047	-1.08927
1453435_a_at	Fmo2	flavin containing monooxygenase 2	NM_018881	chr1:162875951-162898386 (-) // 87.0 // qH2.1 chr1:162875951-162898386 (-) // 87.0 // q	NCBI 38	36.4921	37.8065	43.0203	43.5234	51.8078	43	498.61	431.675	45.067	139.778	42.6357	46.1435	177.547	37.9139	363.341	174.546	39.0072	45.9404	463.939	64.5194	67.7238	251.827	0.084079	-11.8936	-3.57211	5.26716e-05	0.000569811	0.0990231	-10.0987	-3.33609	0.0001006	0.000949397	0.256206	-3.90311	-1.96462	0.00630648	0.0305837	0.268931	-3.71843	-1.89469	0.00787528	0.037227	1.17774	1.17774
1456370_s_at	0610037L13Rik	RIKEN cDNA 0610037L13 gene	NM_028754	chr4:107889903-107897796 (+) // 83.78 // qC7 chr4:107889903-107897796 (+) // 83.78 // q	NCBI 38	262.09	347.326	391.911	279.672	408.068	445.569	379.639	425.644	232.673	378.995	426.839	361.015	454.255	367.593	186.022	255.99	329.2	370.482	401.983	335.131	392.101	218.219	0.818935	-1.2211	-0.288179	0.318487	0.522292	0.921631	-1.08503	-0.117739	0.678565	0.821406	1.53575	1.53575	0.618943	0.0443031	0.139923	1.79682	1.79682	0.845446	0.00950246	0.0430508	1.1254	1.1254
1442316_x_at	Trp53bp1	transformation related protein 53 binding protein 1	NM_013735	chr2:121198252-121271369 (-) // 98.74 // qE5 chr2:121198252-121271369 (-) // 98.74 // q	NCBI 38	30.4193	41.1264	58.1301	35.8584	35.8082	48.7976	37.1828	69.0897	29.8364	35.9898	60.5168	33.4791	33.8988	57.3275	24.4624	30.9498	41.7403	39.716	50.6848	40.2038	40.2197	27.5156	0.823529	-1.21429	-0.280109	0.463196	0.661996	0.783588	-1.27618	-0.351833	0.359858	0.561144	1.46113	1.46113	0.547085	0.163799	0.362043	1.46171	1.46171	0.547657	0.163389	0.362702	0.9515	-1.05097
1454850_at	Tbc1d10c	TBC1 domain family, member 10c	NM_178650	chr19:4184368-4185530 (-) // 95.33 // qA chr19:4184368-4185530 (-) // 95.33 // qA	NCBI 38	44.4018	36.3691	40.5784	41.6617	43.0103	36.7049	1281.69	1705.19	41.7228	33.2834	34.5122	36.0942	36.2993	35.2665	1180	546.244	40.316	40.3658	1478.38	36.3237	35.8838	802.846	0.0272708	-36.6692	-5.1965	3.02989e-11	1.1438e-08	0.0273045	-36.624	-5.19472	3.04289e-11	1.18308e-08	0.0452436	-22.1026	-4.46614	1.99562e-10	4.52284e-08	0.0446957	-22.3735	-4.48372	1.90086e-10	4.39644e-08	1.00123	1.00123
1453583_at	Zzef1	zinc finger, ZZ-type with EF hand domain 1	NM_001045536	chr11:72925785-72927120 (+) // 95.12 // qB4 chr11:72913261-72926183 (+) // 97.49 // qB4	NCBI 38	139.383	143.032	215.829	125.248	134.063	249.92	168.089	292.794	92.7991	159.61	230.166	150.047	150.867	188.368	98.8542	146.854	162.648	161.297	221.845	150.5	162.16	120.487	0.733162	-1.36396	-0.447796	0.278556	0.478888	0.727069	-1.37538	-0.459836	0.266432	0.460326	1.2491	1.2491	0.320889	0.432217	0.670153	1.34587	1.34587	0.428539	0.298818	0.536847	0.991691	-1.00838
1439283_at	Osbpl9	oxysterol binding protein-like 9	NM_001134791 /// NM_133885 /// NM_173350	chr4:109060974-109061474 (-) // 99.8 // qC7 chr4:109061446-109202241 (-) // 95.88 // qC	NCBI 38	65.8882	79.4682	113.797	56.3719	92.8711	110.767	111.373	277.103	54.2179	91.5354	150.051	73.6157	94.6579	107.352	77.3408	117.79	84.1482	83.391	175.676	90.6409	90.7805	95.4458	0.478998	-2.08769	-1.06191	0.037976	0.109701	0.474688	-2.10665	-1.07495	0.0360284	0.10383	0.949655	-1.05301	-0.0745246	0.873597	0.949527	0.951118	-1.05139	-0.0723038	0.877257	0.947299	0.991001	-1.00908
1442679_at	LOC101055694	uncharacterized LOC101055694	XR_168613	chr11:65782740-65783348 (-) // 92.76 // qB3 chr11:65782740-65783348 (-) // 92.76 // qB3	NCBI 38	41.5156	58.8792	101.355	39.2302	47.2322	51.4741	61.5494	155.735	33.0559	54.5885	73.6555	37.0926	49.338	86.0525	51.5124	55.0118	62.8068	45.6895	97.905	51.0331	54.002	53.2334	0.641507	-1.55883	-0.640463	0.196398	0.377233	0.466671	-2.14284	-1.09952	0.0361397	0.104071	0.958668	-1.04311	-0.0608968	0.898917	0.960517	1.01444	1.01444	0.0206835	0.965573	0.985735	0.72746	-1.37465
1457689_at	Sbf2	SET binding factor 2	NM_177324 /// NM_178769	chr7:110308010-110364671 (-) // 91.04 // qE3 chr7:110338946-110352675 (-) // 50.79 // q	NCBI 38	18.2282	19.9538	20.9213	14.9912	20.9213	16.9884	24.3038	129.889	19.6389	15.4309	24.0683	13.9673	17.3221	19.6466	21.6614	43.1086	19.6691	17.466	56.1853	19.3932	16.8138	30.558	0.350076	-2.85652	-1.51426	0.0110758	0.0412631	0.310863	-3.21685	-1.68565	0.00582561	0.0243865	0.634638	-1.5757	-0.655994	0.221699	0.442563	0.550226	-1.81743	-0.861904	0.115619	0.28526	0.887987	-1.12614
1433769_at	Als2cl	ALS2 C-terminal like	NM_001146059 /// NM_001146060 /// NM_146228	chr9:110894621-110899500 (+) // 96.13 // qF2 chr9:110899450-110900530 (+) // 80.63 // q	NCBI 38	157.251	137.357	375.837	155.36	133.592	360.25	1210.46	1937.58	143.596	126.37	545.337	140.171	144.92	667.615	723.983	959.334	200.975	195.541	1531.47	214.69	238.469	833.357	0.131233	-7.62003	-2.9298	0.00204106	0.0104322	0.127685	-7.83176	-2.96934	0.00185081	0.0096579	0.257621	-3.88167	-1.95668	0.0233563	0.085274	0.286155	-3.49461	-1.80513	0.0339324	0.11543	0.972965	-1.02779
1436766_at	LOC100861853 /// Luc7l2	uncharacterized LOC100861853 /// LUC7-like 2 (S. cerevisiae)	NM_001170848 /// NM_001170849 /// NM_138680 /// XR_140762 /// XR_142185	chr6:38551521-38609470 (+) // 96.51 // qB1 chr6:38592684-38603876 (+) // 84.6 // qB1 ch	NCBI 38	125.851	415.673	547.858	106.483	359.236	282.179	345.602	1101.81	119.005	335.86	497.092	244.579	389.79	332.485	278.075	405.471	306.026	221.001	617.048	270.844	316.478	335.786	0.49595	-2.01633	-1.01173	0.195341	0.375841	0.358159	-2.79206	-1.48133	0.0670778	0.167894	0.806597	-1.23978	-0.31008	0.682389	0.849077	0.942493	-1.06102	-0.0854462	0.909945	0.961381	0.722167	-1.38472
1446464_at	Psme4	proteasome (prosome, macropain) activator subunit 4	NM_134013	chr11:30810781-30880361 (+) // 98.74 // qA4 chr11:30810781-30880361 (+) // 98.74 // qA4	NCBI 38	46.0483	45.3839	49.4178	50.0965	50.0965	57.342	92.7014	90.8116	40.9137	42.9464	51.1623	47.8165	42.2693	46.1957	49.9362	49.9362	46.9174	52.4038	91.7515	44.797	45.3663	49.9361	0.511351	-1.9556	-0.967614	3.97626e-06	7.71989e-05	0.571148	-1.75086	-0.808063	2.56151e-05	0.000326531	0.897083	-1.11472	-0.156687	0.23837	0.464454	0.908488	-1.10073	-0.138461	0.294572	0.532548	1.11694	1.11694
1444419_at	Prcp	prolylcarboxypeptidase (angiotensinase C)	NM_028243	chr7:92875299-92901747 (+) // 66.12 // qE1 chr7:92875844-92876544 (+) // 82.91 // qE1 c	NCBI 38	35.9419	54.5667	64.1867	34.0828	45.0872	83.5427	225.675	321.771	38.8126	50.7307	73.0134	46.4192	53.7345	90.3942	163.04	132.199	50.1178	50.4468	269.474	52.386	60.8645	146.811	0.185984	-5.3768	-2.42675	4.40604e-05	0.00049729	0.187205	-5.34174	-2.41731	4.57593e-05	0.000510966	0.356824	-2.8025	-1.48672	0.00273196	0.0156522	0.414575	-2.41211	-1.27029	0.00763068	0.0363144	1.00656	1.00656
1440391_at	Gcn1l1	GCN1 general control of amino-acid synthesis 1-like 1 (yeast)	NM_172719	chr5:115566377-115567220 (+) // 79.5 // qF chr5:115566377-115567220 (+) // 79.5 // qF	NCBI 38	67.7923	84.1355	114.602	73.3873	105.18	82.7487	102.809	229.211	62.6612	82.6028	106.86	84.2319	88.434	80.8891	64.6575	108.194	86.786	86.1202	153.509	82.0858	84.462	83.6394	0.565349	-1.76882	-0.822786	0.0325042	0.0972905	0.561011	-1.7825	-0.833899	0.0305983	0.091519	0.981426	-1.01893	-0.0270486	0.938422	0.977355	1.00983	1.00983	0.0141124	0.967833	0.986613	0.992326	-1.00773
1428467_at	Tardbp	TAR DNA binding protein	NM_001003898 /// NM_001003899 /// NM_001008545 /// NM_001008546 /// NM_145556 /// NR_02	chr4:148616732-148626758 (-) // 97.8 // qE2 chr4:148612386-148613977 (-) // 98.45 // qE	NCBI 38	404.291	595.511	687.51	365.674	576.017	694.563	404.628	582.709	259.648	587.582	757.487	528.808	615.333	684.559	180.687	387.775	549.064	526.927	485.575	487.092	606.183	264.699	1.13075	1.13075	0.17728	0.695468	0.83535	1.08516	1.08516	0.117908	0.794257	0.893582	1.84017	1.84017	0.879839	0.0686722	0.193944	2.29008	2.29008	1.1954	0.0183604	0.0722116	0.959685	-1.04201
1440147_at	Lgi2	leucine-rich repeat LGI family, member 2	NM_144945	chr5:52533516-52533953 (-) // 100.0 // qC1 chr5:52533516-52533953 (-) // 100.0 // qC1 c	NCBI 38	1169.92	2469.79	728.997	1606.74	3108.52	1447.2	107.017	69.5049	906.333	1174.35	516.145	1465.12	1502.67	302.295	59.8437	36.9464	1281.84	1933.5	86.2451	818.983	873.074	47.0212	14.8631	14.8631	3.89366	7.21359e-05	0.00073374	22.4185	22.4185	4.48662	1.79734e-05	0.000249114	17.4173	17.4173	4.12245	4.16707e-05	0.000550979	18.5677	18.5677	4.21472	3.35497e-05	0.000478988	1.50833	1.50833
1445318_at	Klhl4	kelch-like 4	NM_172781	chrX:114559817-114561129 (+) // 99.62 // qE1 chrX:114544630-114545303 (+) // 63.74 // q	NCBI 38	8.88854	10.4006	11.9775	8.8887	8.53727	10.6828	17.8498	36.6764	9.58941	10.1039	11.9814	9.10157	9.20811	11.5791	12.2129	15.9348	10.3455	9.32426	25.5865	10.5098	9.90042	13.9503	0.404335	-2.47319	-1.30638	0.00023574	0.00186728	0.364422	-2.74407	-1.45632	8.77731e-05	0.000852424	0.753379	-1.32735	-0.408552	0.139492	0.324007	0.709693	-1.40906	-0.494733	0.0790512	0.216691	0.901286	-1.10953
1444583_at	Nasp	nuclear autoantigenic sperm protein (histone-binding)	NM_001081475 /// NM_016777	chr4:116601051-116627941 (-) // 99.09 // qD1 chr4:116601051-116627941 (-) // 99.09 // q	NCBI 38	49.6827	49.0827	58.6651	46.1853	49.6394	74.7429	108.385	148.379	51.1962	58.6565	84.8633	54.6558	57.7082	59.856	79.0919	60.4404	52.3004	55.5436	126.803	63.4004	57.3666	69.1401	0.412451	-2.42453	-1.27771	0.000178191	0.00148991	0.438027	-2.28296	-1.19091	0.000330607	0.00243123	0.916984	-1.09053	-0.125032	0.619649	0.81085	0.829718	-1.20523	-0.269307	0.293412	0.531453	1.06201	1.06201
1457313_at	Ocrl	oculocerebrorenal syndrome of Lowe	NM_177215	chrX:47956416-47957090 (+) // 59.35 // qA5 chrX:47964147-47965871 (+) // 99.71 // qA5 c	NCBI 38	37.9654	36.5557	75.964	33.0464	34.1165	43.9687	49.9052	84.3561	41.7839	33.8949	73.3325	48.0464	38.4781	71.0166	30.259	41.5194	47.2408	36.7347	64.8831	47.0053	50.8251	35.4447	0.728091	-1.37345	-0.457809	0.267063	0.465284	0.566169	-1.76626	-0.820695	0.0581296	0.150344	1.32615	1.32615	0.407244	0.321071	0.560664	1.43392	1.43392	0.519965	0.210601	0.428896	0.777608	-1.286
1438127_at	LOC552906	uncharacterized LOC552906	---	chr1:162728616-162729471 (-) // 71.2 // qH2.1 chr1:162728616-162729471 (-) // 71.2 // q	NCBI 38	71.4478	96.0682	107.848	60.8214	69.8791	124.548	260.163	262.04	71.6616	85.6473	128.033	71.3258	98.923	114.32	129.047	157.672	90.4607	80.8934	261.1	92.2802	93.0871	142.643	0.346461	-2.88633	-1.52924	0.00037338	0.00269351	0.309818	-3.22771	-1.69051	0.000154677	0.00133719	0.646928	-1.54577	-0.628323	0.0717216	0.200267	0.652585	-1.53237	-0.615762	0.076881	0.212282	0.894236	-1.11827
1457579_at	D11Ertd717e	DNA segment, Chr 11, ERATO Doi 717, expressed	---	chr11:101053838-101054400 (+) // 23.74 // qD chr11:101053838-101054400 (+) // 23.74 //	NCBI 38	101.012	94.0155	267.713	107.631	90.4249	196.797	86.9987	196.617	94.1112	114.356	309.61	125.612	109.814	237.071	57.3256	89.0617	136.483	124.189	130.787	149.361	148.43	71.4529	1.04355	1.04355	0.0614997	0.919923	0.96262	0.949545	-1.05314	-0.0746917	0.902839	0.952663	2.09034	2.09034	1.06374	0.0998736	0.255178	2.07732	2.07732	1.05472	0.102488	0.261842	0.909916	-1.099
1451203_at	Mb	myoglobin	NM_001164047 /// NM_001164048 /// NM_013593	chr15:77023273-77023573 (-) // 99.67 // qD3 chr15:77015486-77050668 (-) // 93.64 // qD3	NCBI 38	89.2096	66.7251	53.5192	108.975	78.7721	58.8447	351.791	63.2639	83.053	62.2018	53.2373	78.7211	61.9255	47.6517	94.4771	70.4589	68.2975	79.641	149.183	65.0316	61.4725	81.5888	0.457808	-2.18432	-1.12719	0.0558547	0.148165	0.533845	-1.8732	-0.905507	0.115403	0.252819	0.797064	-1.2546	-0.327233	0.552359	0.76387	0.75344	-1.32725	-0.408435	0.460025	0.691138	1.16609	1.16609
1441192_at	Scly	selenocysteine lyase	NM_016717	chr1:91300524-91321074 (+) // 92.8 // qD chr1:91310644-91311331 (+) // 38.74 // qD chr1	NCBI 38	52.9343	85.3417	124.464	53.2134	86.0864	119.712	127.734	477.755	56.8684	94.8119	296.292	72.5404	81.7471	264.337	68.4848	266.782	82.5388	81.8528	247.043	116.902	116.166	135.165	0.334106	-2.99306	-1.58162	0.0768629	0.188638	0.33133	-3.01814	-1.59366	0.0749036	0.182579	0.864885	-1.15622	-0.20942	0.802951	0.916622	0.859439	-1.16355	-0.218533	0.794577	0.908203	0.991689	-1.00838
1434833_at	Map4k2	mitogen-activated protein kinase kinase kinase kinase 2	NM_009006	chr19:6341487-6354920 (+) // 99.14 // qA chr19:6354724-6355619 (+) // 57.65 // qA chr19	NCBI 38	241.382	303.468	445.651	237.788	294.858	438.078	1903.4	2418.85	225.961	297.315	443.352	279.278	293.124	413.146	1284.28	1073.21	319.597	313.174	2145.65	309.98	323.392	1173.99	0.148949	-6.71372	-2.74711	1.66644e-06	4.01858e-05	0.145955	-6.85144	-2.7764	1.48334e-06	3.73327e-05	0.264034	-3.7874	-1.9212	6.59608e-05	0.000792039	0.275459	-3.6303	-1.86009	8.95007e-05	0.00104764	0.979899	-1.02051
1422514_at	Aebp1	AE binding protein 1	NM_009636	chr11:5861946-5872239 (+) // 97.35 // qA1 chr11:5861946-5872239 (+) // 97.35 // qA1 chr	NCBI 38	4270.49	5008.8	4681.53	4266.34	4080.05	4519.77	437.239	451.954	3617.26	6300.17	3113.81	4048.04	6445.48	2971	240.612	246.17	4643.83	4285.06	444.546	4140.24	4264.02	243.381	10.4461	10.4461	3.38489	4.8137e-08	2.75861e-06	9.63902	9.63902	3.26889	7.24378e-08	3.78565e-06	17.0109	17.0109	4.08839	5.06479e-09	5.32208e-07	17.5195	17.5195	4.13089	4.46979e-09	4.84596e-07	0.922735	-1.08373
1436447_at	A630026N12Rik	RIKEN cDNA A630026N12 gene	---	chr2:126669927-126670494 (-) // 96.1 // qF1 chr2:126669927-126670494 (-) // 96.1 // qF1	NCBI 38	65.6223	112.047	141.151	88.265	139.69	136.317	157.9	233.188	56.8038	130.604	200.07	132.952	173.027	187.598	90.3424	122.191	101.246	118.896	191.887	114.07	162.809	105.067	0.527635	-1.89525	-0.922388	0.0624904	0.161358	0.619617	-1.6139	-0.690551	0.150987	0.30812	1.08569	1.08569	0.118612	0.797254	0.913452	1.54958	1.54958	0.631877	0.18599	0.39497	1.17433	1.17433
1457296_at	Cilp	cartilage intermediate layer protein, nucleotide pyrophosphohydrolase	NM_173385	chr9:65274534-65280614 (+) // 99.25 // qC chr9:65274534-65280614 (+) // 99.25 // qC	NCBI 38	79.7124	55.791	30.0624	83.7627	46.0967	44.6925	859.191	45.507	100.464	110.115	37.2473	114.044	180.799	35.3558	370.355	31.6514	51.1333	55.6739	197.733	74.4129	89.9992	108.269	0.258596	-3.86704	-1.95123	0.121861	0.26746	0.28156	-3.55164	-1.82849	0.144906	0.29912	0.6873	-1.45497	-0.540988	0.653747	0.832268	0.83126	-1.20299	-0.266628	0.824509	0.923169	1.0888	1.0888
1437387_at	Susd5	sushi domain containing 5	NM_001101510	chr9:114098118-114098733 (+) // 99.35 // qF3 chr9:114098118-114098733 (+) // 99.35 // q	NCBI 38	42.9869	44.0969	38.7467	48.3925	46.8886	34.6983	97.8521	75.4623	47.6431	41.7963	38.1752	45.9972	46.8886	32.9414	53.8192	41.2054	41.8786	42.857	85.9395	42.3617	41.4173	47.092	0.487306	-2.0521	-1.0371	0.000244124	0.00191816	0.498691	-2.00525	-1.00378	0.000324569	0.0023958	0.899554	-1.11166	-0.152718	0.473271	0.705141	0.879497	-1.13701	-0.185249	0.3866	0.626475	1.02336	1.02336
1440047_at	Socs1	suppressor of cytokine signaling 1	NM_001271603 /// NM_009896	chr16:10782239-10782900 (-) // 95.86 // qA1 chr16:10782239-10782900 (-) // 95.86 // qA1	NCBI 38	121.597	101.406	85.5731	129.413	104.677	88.9295	217.973	597.844	104.173	103.981	84.0902	112.389	109.757	77.8752	184.421	212.6	101.803	106.4	360.991	96.9252	98.6714	198.007	0.282012	-3.54595	-1.82617	0.000116468	0.00106289	0.294745	-3.39276	-1.76246	0.000161061	0.00138204	0.489504	-2.04289	-1.03061	0.00899254	0.0404803	0.498321	-2.00674	-1.00485	0.0104071	0.0461752	1.04515	1.04515
1452991_at	1810026B05Rik /// Chd2	RIKEN cDNA 1810026B05 gene /// chromodomain helicase DNA binding protein 2	NM_001081345 /// NR_037569	chr7:73426638-73428893 (-) // 97.74 // qD1 chr7:73451797-73456250 (-) // 95.66 // qD1 c	NCBI 38	110.422	163.576	189.241	136.392	151.015	189.371	729.061	324.347	88.7698	161.612	265.097	151.801	177.547	327.985	320.342	222.603	150.638	157.414	486.272	156.093	206.767	267.038	0.30978	-3.2281	-1.69068	0.0030857	0.0145781	0.323715	-3.08914	-1.6272	0.0040006	0.0179444	0.584533	-1.71077	-0.774644	0.120149	0.291505	0.774298	-1.29149	-0.369039	0.44214	0.675735	1.04499	1.04499
1416136_at	Mmp2	matrix metallopeptidase 2	NM_008610	chr8:92827296-92853420 (+) // 97.77 // qC5 chr8:92827296-92853420 (+) // 97.77 // qC5 c	NCBI 38	2999.25	3503.5	3951.81	2829.8	3422.18	4479.41	602.711	129.545	2164.54	3771.24	2036.7	2463.94	4335.74	2293.17	249.156	94.5489	3462.74	3513.52	279.427	2552.15	2904.35	153.484	12.3927	12.3927	3.63142	2.2281e-05	0.00029246	12.5744	12.5744	3.65242	2.10274e-05	0.000281998	16.6287	16.6287	4.0556	7.17438e-06	0.000137339	18.9224	18.9224	4.24202	4.46307e-06	9.79031e-05	1.01467	1.01467
1441352_at	9430034N14Rik	RIKEN cDNA 9430034N14 gene	---	chr1:156026220-156027343 (-) // 63.06 // qG3 chr1:156026220-156027343 (-) // 63.06 // q	NCBI 38	28.0184	34.3874	45.4112	26.2539	36.6613	27.9482	39.012	124.359	28.8931	39.3889	52.0904	33.6068	36.6123	44.8017	36.8473	39.7768	35.2373	29.963	69.6528	38.9918	38.0583	38.284	0.505899	-1.97668	-0.983079	0.0264282	0.0827217	0.430177	-2.32463	-1.217	0.00849296	0.0331178	1.01849	1.01849	0.0264318	0.947298	0.980864	0.994104	-1.00593	-0.00853131	0.982978	0.993063	0.850321	-1.17603
1440254_at	Snord104	small nucleolar RNA, C/D box 104	NR_030703	chr11:106500926-106501211 (+) // 98.26 // qE1 chr11:106500926-106501211 (+) // 98.26 //	NCBI 38	807.53	1069.3	942.847	854.372	1208.61	1005.86	2831.17	2584.77	714.118	1205.42	841.369	910.016	1341.42	863.634	2104.48	1051.5	933.742	1012.7	2705.16	898.036	1017.74	1487.53	0.345178	-2.89705	-1.53459	0.000210581	0.00170396	0.374366	-2.67118	-1.41748	0.000418789	0.00293289	0.603708	-1.65643	-0.728077	0.0310725	0.106668	0.684179	-1.46161	-0.547554	0.0920783	0.242303	1.08456	1.08456
1422828_at	Cd3d	CD3 antigen, delta polypeptide	NM_013487	chr9:44981785-44986439 (+) // 99.58 // qA5.2 chr9:44981785-44986439 (+) // 99.58 // qA5	NCBI 38	112.46	84.8003	83.1168	121.034	92.9488	83.5629	4384.2	4496.99	101.899	93.7278	65.4007	107.086	103.298	62.0227	3733.36	1597.58	92.5442	97.9579	4440.17	85.4785	88.191	2442.26	0.0208423	-47.9794	-5.58434	5.21238e-10	9.28335e-08	0.0220615	-45.3279	-5.50233	6.25299e-10	1.09309e-07	0.0350006	-28.5709	-4.83648	3.02354e-09	3.6171e-07	0.0361112	-27.6922	-4.79141	3.3877e-09	3.96854e-07	1.0585	1.0585
1438892_at	Dep1	diabetic embryopathy 1	---	chr17:10314572-10317848 (-) // 98.79 // qA1 chr17:10313184-10313844 (-) // 100.0 // qA1	NCBI 38	11.7215	14.3897	14.5116	11.8778	13.9333	13.2851	23.4944	41.0874	12.3903	12.8742	15.7071	13.7576	14.9746	15.4024	17.3624	16.8208	13.4767	13.0032	31.0698	13.5821	14.6948	17.0895	0.433758	-2.30543	-1.20504	5.1777e-05	0.000562833	0.418519	-2.38938	-1.25663	3.44216e-05	0.000412227	0.794763	-1.25824	-0.331403	0.126849	0.303277	0.859872	-1.16296	-0.217806	0.303078	0.54124	0.964867	-1.03641
1449773_s_at	Gadd45b	growth arrest and DNA-damage-inducible 45 beta	NM_008655	chr10:80931921-80932204 (-) // 96.92 // qC1 chr10:80931921-80932204 (+) // 96.92 // qC1	NCBI 38	785.13	742.806	850.768	858.688	828.398	825.366	3160.99	1610.3	718.666	745.23	875.948	781.221	770.286	1074.27	2888.77	533.095	791.667	837.358	2256.23	777.032	864.673	1241.01	0.350891	-2.84989	-1.51091	0.00951111	0.036498	0.371143	-2.69438	-1.42995	0.0129925	0.0465983	0.626138	-1.59709	-0.675447	0.196929	0.409615	0.696762	-1.43521	-0.521262	0.312952	0.552015	1.05771	1.05771
1436466_at	Khnyn	KH and NYN domain containing	NM_027143	chr14:55897937-55898780 (+) // 76.95 // qC3 chr14:55888167-55888835 (+) // 77.06 // qC3	NCBI 38	133.61	95.852	73.7406	84.2748	102.708	86.2322	237.812	261.541	85.481	123.396	84.5683	95.314	112.776	72.1444	191.081	98.5537	98.1101	90.7106	249.393	96.263	91.8737	137.229	0.393395	-2.54197	-1.34595	0.000704359	0.00445419	0.363723	-2.74934	-1.45909	0.00036013	0.00260836	0.701477	-1.42556	-0.511532	0.11676	0.285512	0.669494	-1.49367	-0.578857	0.0796817	0.218013	0.924575	-1.08158
1425570_at	Slamf1	signaling lymphocytic activation molecule family member 1	NM_013730	chr1:171767126-171801360 (+) // 87.94 // qH3 chr1:171767126-171801360 (+) // 87.94 // q	NCBI 38	76.2566	52.9396	46.2843	66.2775	51.9693	43.6473	386.366	473.445	52.0112	48.1332	49.4772	54.6697	58.4025	45.5221	451.339	122.723	57.1694	53.1729	427.695	49.851	52.5774	235.351	0.133669	-7.48119	-2.90326	7.04501e-06	0.000118603	0.124324	-8.04349	-3.00782	4.85023e-06	9.11459e-05	0.211815	-4.72109	-2.23912	9.30701e-05	0.00104991	0.223401	-4.47626	-2.16229	0.000128597	0.00140106	0.930092	-1.07516
1439843_at	Camk4	calcium/calmodulin-dependent protein kinase IV	NM_009793	chr18:32939159-33187029 (+) // 98.74 // qB1 chr18:33182001-33185339 (+) // 95.78 // qB1	NCBI 38	27.4392	34.2652	72.9509	31.509	26.9385	77.5375	96.7149	158.832	32.9226	27.5514	79.7961	31.5534	21.0057	111.936	57.491	80.9764	40.9378	40.3744	123.958	41.6747	42.0196	68.2307	0.330255	-3.02796	-1.59835	0.0392939	0.112685	0.32571	-3.07022	-1.61834	0.0372748	0.106569	0.610793	-1.63722	-0.711245	0.326133	0.566306	0.615845	-1.62378	-0.699361	0.333979	0.574111	0.986238	-1.01395
1428694_at	Mir17hg	Mir17 host gene 1 (non-protein coding)	NR_029382	chr14:115044390-115046728 (+) // 99.4 // qE4 chr14:115044390-115046728 (+) // 99.4 // q	NCBI 38	151.613	221.949	201.349	146.032	222.338	199.196	311.296	342.084	92.7942	193.845	191.053	175.762	182.408	195.892	165.54	194.986	189.225	186.315	326.328	150.907	184.499	179.661	0.579864	-1.72454	-0.786214	0.0176482	0.0598883	0.570945	-1.75148	-0.808576	0.0152316	0.0529246	0.839956	-1.19054	-0.251614	0.399926	0.641557	1.02693	1.02693	0.0383378	0.896511	0.955516	0.984618	-1.01562
1427515_at	Gsap	gamma-secretase activating protein	NM_175437	chr5:21186254-21251857 (+) // 77.61 // qA3 chr5:21186254-21251857 (+) // 77.61 // qA3 c	NCBI 38	23.4981	21.8309	59.5587	19.2443	21.8399	27.4717	42.6845	128.137	30.8458	20.2866	90.8592	31.6457	18.0649	63.3606	44.4048	37.3646	31.262	22.602	73.9557	38.4526	33.0869	40.7328	0.422711	-2.36568	-1.24226	0.0884007	0.209542	0.305614	-3.2721	-1.71022	0.0249142	0.0779668	0.944017	-1.0593	-0.0831153	0.903735	0.962194	0.81229	-1.23109	-0.299933	0.663621	0.836705	0.722985	-1.38315
1456806_at	A130010C12Rik	RIKEN cDNA A130010C12 gene	---	chr8:117260112-117260801 (+) // 99.13 // qE1 chr8:117260112-117260801 (+) // 99.13 // q	NCBI 38	97.5517	109.811	168.071	106.134	84.4511	212.212	361.235	615.779	133.38	97.2045	183.047	132.819	93.2872	181.414	266.985	252.86	121.653	123.895	471.636	133.373	130.993	259.806	0.257939	-3.87689	-1.9549	0.000393048	0.00280975	0.262691	-3.80675	-1.92856	0.000440897	0.00305077	0.513355	-1.94797	-0.961971	0.036353	0.120503	0.504199	-1.98335	-0.987935	0.0323069	0.110964	1.01842	1.01842
1458181_at	9030624J02Rik	RIKEN cDNA 9030624J02 gene	NM_027815	chr7:118775314-118842966 (+) // 84.64 // qF2 chr7:118775314-118842966 (+) // 84.64 // q	NCBI 38	61.1459	73.3617	77.0448	63.5462	61.5083	109.97	106.61	151.832	63.0854	63.9624	97.8475	66.8589	69.0282	79.6841	66.5671	73.9556	70.1767	75.4684	127.227	73.3614	71.6448	70.164	0.551586	-1.81295	-0.858342	0.00651814	0.0269652	0.593179	-1.68583	-0.753461	0.0139091	0.049232	1.04557	1.04557	0.0642897	0.812005	0.921224	1.02111	1.02111	0.0301383	0.911162	0.961886	1.07541	1.07541
1437176_at	Nlrc5	NLR family, CARD domain containing 5	NM_001033207	chr8:94523174-94527268 (+) // 86.93 // qC5 chr8:94523174-94527268 (+) // 86.93 // qC5	NCBI 38	227.174	246.557	370.183	322.602	230.322	354.021	1781.68	2783.28	306.068	189.494	491.547	462.05	196.158	404.196	1042.88	1447.34	274.72	297.398	2226.71	305.483	332.118	1228.52	0.123372	-8.10559	-3.01891	8.5225e-06	0.000137719	0.133556	-7.4875	-2.90448	1.27074e-05	0.0001899	0.248654	-4.02166	-2.00779	0.000409525	0.00340593	0.270333	-3.69914	-1.88719	0.000683911	0.00529889	1.08255	1.08255
1449283_a_at	Mapk12	mitogen-activated protein kinase 12	NM_013871	chr15:89130584-89130789 (-) // 82.57 // qE3 chr15:89130584-89140673 (-) // 98.67 // qE3	NCBI 38	288.057	340.92	482.157	278.172	391.386	555.235	2533.64	3842.51	273.807	363.742	434.255	320.86	374.031	512.799	1911.05	1550.8	361.775	392.462	3120.15	351.015	394.811	1721.56	0.115948	-8.62457	-3.10845	3.1175e-07	1.12482e-05	0.125783	-7.95023	-2.99099	4.82455e-07	1.58479e-05	0.2039	-4.90436	-2.29407	8.63342e-06	0.000157599	0.22934	-4.36033	-2.12444	1.89809e-05	0.000303781	1.08482	1.08482
1440307_at	Gtf3c2	general transcription factor IIIC, polypeptide 2, beta	NM_027901	chr5:31156004-31168474 (-) // 88.65 // qB1 chr5:31156004-31168474 (-) // 88.65 // qB1 c	NCBI 38	133.103	147.066	149.042	133.134	140.277	215.902	210.065	235.797	121.337	141.422	164.45	154.703	133.592	218.32	113.422	133.166	142.891	159.164	222.56	141.313	165.244	122.898	0.642033	-1.55755	-0.639281	0.017522	0.0595299	0.715152	-1.3983	-0.483678	0.0601248	0.154187	1.14984	1.14984	0.201433	0.406421	0.647955	1.34455	1.34455	0.427123	0.0920982	0.242313	1.11389	1.11389
1443384_at	Ptk2	PTK2 protein tyrosine kinase 2	NM_001130409 /// NM_007982	chr15:73205102-73394724 (-) // 98.59 // qD3 chr15:73320230-73423212 (-) // 91.77 // qD3	NCBI 38	50.88	55.9109	58.9317	51.5013	46.0365	46.6817	61.4296	129.054	54.6649	65.0923	49.1352	62.6987	50.1185	49.7662	48.2382	50.1185	55.1428	48.0205	89.0479	55.9253	53.8834	49.1739	0.619251	-1.61485	-0.691404	0.0138188	0.0492759	0.539266	-1.85437	-0.890931	0.00286888	0.01374	1.1373	1.1373	0.185613	0.458363	0.692219	1.09578	1.09578	0.131958	0.596094	0.794129	0.870836	-1.14832
1452405_x_at	Trav9d-3	T cell receptor alpha variable 9D-3	---	chr14:53806524-54224202 (+) // 97.75 // qC2 chr14:53259677-54223097 (+) // 97.73 // qC2	NCBI 38	201.36	491.011	247.775	202.519	424.222	360.709	6358.69	6264.06	367.781	243.848	175.133	208.062	194.659	403.29	4641.71	2617.59	290.429	314.102	6311.21	250.433	253.723	3485.62	0.0460187	-21.7303	-4.44164	2.9761e-07	1.09037e-05	0.0497698	-20.0925	-4.32859	3.98924e-07	1.38293e-05	0.071847	-13.9185	-3.79893	1.70866e-06	4.50131e-05	0.0727908	-13.738	-3.7801	1.80413e-06	4.8665e-05	1.08151	1.08151
1442992_at	130004C03	uncharacterized LOC403343	---	chr9:46074815-46075537 (+) // 51.1 // qA5.2 chr9:46074815-46075537 (+) // 51.1 // qA5.2	NCBI 38	45.1109	42.7572	75.6299	44.8076	40.2472	63.9194	140.406	152.995	60.2203	33.4467	58.6232	40.052	43.8069	40.6339	82.3451	79.5983	52.6415	48.6676	146.565	49.0595	41.4652	80.9601	0.359167	-2.78422	-1.47727	0.00019642	0.00161127	0.332054	-3.01156	-1.59051	0.000100222	0.000946715	0.60597	-1.65025	-0.722682	0.026012	0.0927624	0.51217	-1.95248	-0.965305	0.00519838	0.0267915	0.92451	-1.08165
1436957_at	Gabra3	gamma-aminobutyric acid (GABA) A receptor, subunit alpha 3	NM_008067	chrX:72434605-72656186 (-) // 98.68 // qA7.3 chrX:72432675-72433371 (-) // 100.0 // qA7	NCBI 38	334.139	721.971	459.066	726.017	1020.25	566.272	138.964	176.065	497.253	897.569	322.944	762.728	1374.84	182.34	98.5036	75.8174	480.219	748.537	156.42	524.311	576.094	86.4198	3.07008	3.07008	1.61828	0.0305778	0.0927431	4.78545	4.78545	2.25865	0.00490333	0.0211652	6.06703	6.06703	2.60099	0.00184961	0.0114824	6.66622	6.66622	2.73687	0.00126296	0.00864145	1.55874	1.55874
1431182_at	Hspa8	heat shock protein 8	NM_031165	chr9:40801286-40805167 (+) // 95.62 // qA5.1 /// chr5:5781561-5783618 (-) // 95.34 // q	NCBI 38	514.297	682.622	977.619	638.247	566.768	1035.95	4802.66	695.45	361.239	844.965	1006.23	780.343	675.307	1003.37	1918.99	531.402	700.135	720.957	1827.56	674.694	808.621	1009.83	0.383097	-2.61031	-1.38422	0.0772996	0.18939	0.394488	-2.53493	-1.34195	0.0856833	0.202353	0.668126	-1.49672	-0.581808	0.434301	0.671975	0.800748	-1.24883	-0.32058	0.663938	0.83683	1.02973	1.02973
1445535_at	AA407107	expressed sequence AA407107	---	chr8:47936826-47937399 (-) // 99.83 // qB1.1 chr8:47936826-47937399 (-) // 99.83 // qB1	NCBI 38	23.5224	26.365	43.24	25.8453	21.0127	32.1763	32.9448	73.0419	28.6835	27.7129	37.4292	24.4862	28.1633	39.5804	22.3933	32.8168	29.9317	25.9498	49.0547	30.9865	30.1089	27.1086	0.610172	-1.63888	-0.712712	0.0660864	0.168014	0.528997	-1.89037	-0.918669	0.0226459	0.0723009	1.14306	1.14306	0.192901	0.596031	0.795832	1.11068	1.11068	0.151443	0.676616	0.844128	0.866964	-1.15345
1421628_at	Il18r1	interleukin 18 receptor 1	NM_001161842 /// NM_001161843 /// NM_008365	chr1:40466005-40500833 (+) // 92.05 // qB chr1:40466005-40500833 (+) // 92.05 // qB	NCBI 38	181.89	296.356	108.241	194.583	290.811	88.2017	807.727	778.82	154.185	349.8	164.11	145.571	400.797	209.485	567.139	339.199	180.027	170.895	793.145	206.854	230.348	438.602	0.226979	-4.40568	-2.13937	0.00238146	0.0118042	0.215467	-4.64109	-2.21446	0.00185568	0.00967801	0.471621	-2.12035	-1.0843	0.0785974	0.214098	0.525185	-1.90409	-0.929102	0.125811	0.302833	0.949279	-1.05343
1428776_at	Slc10a6	solute carrier family 10 (sodium/bile acid cotransporter family), member 6	NM_029415	chr5:103605709-103629403 (-) // 98.61 // qE5 chr5:103605709-103629403 (-) // 98.61 // q	NCBI 38	175.941	160.998	112.11	184.219	255.485	126.797	409.708	286.879	152.231	406.827	90.7502	196.985	933.434	92.2484	216.183	166.433	146.987	181.385	342.835	177.795	256.937	189.683	0.428737	-2.33243	-1.22184	0.139966	0.295988	0.529074	-1.8901	-0.918459	0.258401	0.450393	0.937324	-1.06687	-0.0933803	0.90616	0.963496	1.35455	1.35455	0.437814	0.582659	0.785769	1.23403	1.23403
1443490_at	D3Ertd34e	DNA segment, Chr 3, ERATO Doi 34, expressed	---	chr3:90082028-90082589 (+) // 49.31 // qF1 chr3:90082028-90082589 (+) // 49.31 // qF1	NCBI 38	162.177	170.203	259.085	161.706	164.218	213.61	359.628	746.691	146.813	163.079	263.483	194.941	170.703	232.984	239.782	342.984	192.664	178.343	518.198	184.773	197.921	286.778	0.371794	-2.68966	-1.42742	0.000911207	0.00547879	0.344158	-2.90564	-1.53886	0.000495269	0.00335291	0.644306	-1.55206	-0.634182	0.0796104	0.216022	0.690152	-1.44896	-0.535014	0.132589	0.313542	0.925668	-1.0803
1433530_at	Rpl41	ribosomal protein L41	NM_018860	chr10:128548113-128549078 (-) // 59.77 // qD3 chr10:128548113-128549136 (-) // 82.25 //	NCBI 38	188.329	221.693	235.615	172.723	209.074	230.924	338.33	659.738	156.343	241.363	172.034	207.367	218.544	190.877	231.818	295.041	214.269	202.788	472.461	186.549	205.282	261.528	0.453516	-2.20499	-1.14077	0.000764348	0.00476539	0.429216	-2.32983	-1.22022	0.000439604	0.00304369	0.713303	-1.40193	-0.487413	0.0842081	0.225313	0.784932	-1.274	-0.34936	0.202995	0.418819	0.946418	-1.05662
1441450_s_at	Kdm5c	lysine (K)-specific demethylase 5C	NM_013668	chrX:152274152-152274529 (+) // 12.94 // qF3 chrX:152233241-152274089 (+) // 96.82 // q	NCBI 38	116.61	125.297	107.996	120.341	116.136	111.25	109.858	205.37	84.8645	109.429	120.529	131.763	111.36	129.335	85.2669	81.2192	116.42	115.848	150.205	103.829	123.807	83.2184	0.775073	-1.2902	-0.367596	0.119729	0.263821	0.771264	-1.29657	-0.374703	0.113394	0.249562	1.24766	1.24766	0.319225	0.171718	0.373475	1.48774	1.48774	0.573122	0.0222286	0.0835234	0.995087	-1.00494
1423771_at	Prkcdbp	protein kinase C, delta binding protein	NM_028444	chr7:105480083-105482237 (-) // 99.25 // qE3 chr7:105480083-105482237 (-) // 99.25 // q	NCBI 38	1533.21	1809.44	1331.77	1638.8	2061.17	1422.41	351.623	283.9	1793.84	1930.7	1087.45	1449.91	1921.73	1194.04	238.837	128.318	1545.97	1687.42	315.958	1555.86	1492.9	175.068	4.8929	4.8929	2.29069	5.52662e-06	9.87153e-05	5.34066	5.34066	2.41702	3.1169e-06	6.52019e-05	8.8872	8.8872	3.15173	1.60706e-07	7.48762e-06	8.52749	8.52749	3.09212	2.00212e-07	9.1302e-06	1.09151	1.09151
1439687_at	Rab14	RAB14, member RAS oncogene family	NM_026697	chr2:35179945-35201120 (-) // 99.17 // qB chr2:35179945-35201120 (-) // 99.17 // qB chr	NCBI 38	36.082	59.5919	84.5338	28.9518	46.9752	27.5212	51.0693	118.023	37.1217	54.7997	88.8303	41.5552	43.5076	70.4857	38.6959	47.8343	56.6459	33.4506	77.6358	56.5357	50.3228	43.0231	0.729638	-1.37054	-0.454747	0.336018	0.541452	0.430865	-2.32091	-1.21469	0.0194326	0.0640337	1.31408	1.31408	0.394053	0.40234	0.643889	1.16967	1.16967	0.226102	0.627637	0.814685	0.59052	-1.69342
1456975_at	Taok1	TAO kinase 1	NM_144825	chr11:77535979-77553910 (-) // 94.93 // qB5 chr11:77535979-77553910 (-) // 94.93 // qB5	NCBI 38	31.4635	47.2457	72.136	26.9563	41.1999	47.8327	35.9514	102.715	33.407	45.6801	77.463	38.9549	43.0946	69.9353	23.2242	48.8494	47.5087	37.5919	60.768	49.0778	48.9661	33.6821	0.781805	-1.27909	-0.355119	0.503508	0.696863	0.618612	-1.61652	-0.692893	0.202526	0.380556	1.45709	1.45709	0.54309	0.311913	0.550676	1.45376	1.45376	0.539789	0.314742	0.553936	0.791262	-1.2638
1437052_s_at	Slc2a3	solute carrier family 2 (facilitated glucose transporter), member 3	NM_011401	chr6:122729384-122742520 (-) // 98.29 // qF1 chr6:122735535-122737111 (-) // 71.24 // q	NCBI 38	859.398	802.151	994.608	815.728	772.155	697.859	3421.8	2887.1	727.735	1107.34	649.153	706.579	1116.51	516.272	2856.19	1065.12	881.85	760.387	3143.38	805.784	741.283	1744.26	0.28055	-3.56443	-1.83367	0.000333172	0.00245851	0.241908	-4.1338	-2.04747	0.000125017	0.00112835	0.461961	-2.16469	-1.11416	0.0115859	0.0493549	0.424981	-2.35305	-1.23453	0.00630544	0.0311592	0.862266	-1.15973
1445360_at	Tgfb1	transforming growth factor, beta 1	NM_011577	chr7:25687018-25705077 (+) // 94.4 // qA3 chr7:25690009-25690666 (+) // 52.43 // qA3 ch	NCBI 38	84.7765	76.8494	74.5076	83.847	69.4303	69.3742	135.618	209.325	82.8413	76.752	148.323	86.7361	84.9281	106.821	101.059	86.5311	78.5909	73.9173	168.488	98.0652	92.3212	93.5133	0.466447	-2.14386	-1.10021	0.000979572	0.00579578	0.438708	-2.27942	-1.18867	0.000525086	0.00352043	1.04868	1.04868	0.0685745	0.795536	0.912718	0.987252	-1.01291	-0.0185097	0.944166	0.97659	0.94053	-1.06323
1449368_at	Dcn	decorin	NM_001190451 /// NM_007833	chr10:97483765-97484443 (+) // 98.53 // qC3 chr10:97479551-97518163 (+) // 95.2 // qC3	NCBI 38	16301.2	19743	15133.2	17381.2	20171.6	14187.9	8081.01	5308.91	15097.1	19422.6	14555.8	17733.4	21110	12047.4	6082.45	2173.95	16950	17070.3	6549.64	16220.2	16520.8	3636.16	2.58788	2.58788	1.37177	0.00253425	0.0124155	2.60619	2.60619	1.38194	0.00240499	0.0118946	4.46072	4.46072	2.15728	5.69488e-05	0.000706006	4.54349	4.54349	2.1838	5.06357e-05	0.000665253	1.00708	1.00708
1418402_at	Adam19	a disintegrin and metallopeptidase domain 19 (meltrin beta)	NM_009616	chr11:46055991-46147343 (+) // 89.32 // qB1.1 chr11:46055991-46147343 (+) // 89.32 // q	NCBI 38	4577.58	4214.89	3744.48	4091.54	4214.84	3973.62	1779.8	2038.19	3947.08	3762.92	2783.53	3791.05	3382.55	2766	1267.48	882.204	4165	4092.03	1904.64	3457.71	3285.73	1057.47	2.18674	2.18674	1.12878	7.10701e-05	0.000724992	2.14854	2.14854	1.10336	8.80911e-05	0.000855144	3.26992	3.26992	1.70926	9.65398e-07	2.91046e-05	3.10713	3.10713	1.63558	1.57034e-06	4.38267e-05	0.982533	-1.01778
1441823_at	Zmiz1	zinc finger, MIZ-type containing 1	NM_001033402 /// NM_183208	chr14:25658222-25666743 (+) // 97.45 // qA3 chr14:25538174-25538495 (+) // 90.59 // qA3	NCBI 38	81.7129	97.9717	121.21	63.6708	93.2635	76.6606	157.607	357.86	98.9498	119.547	129.205	90.7249	109.991	119.371	136.72	127.352	99.0016	76.926	237.49	115.189	106.005	131.952	0.416868	-2.39884	-1.26234	0.0008581	0.00523626	0.323914	-3.08724	-1.62632	9.59393e-05	0.000915758	0.872958	-1.14553	-0.196016	0.514501	0.737143	0.80336	-1.24477	-0.315881	0.299876	0.537911	0.777018	-1.28697
1442070_at	Mllt10	myeloid/lymphoid or mixed-lineage leukemia (trithorax homolog, Drosophila); translocate	NM_001252560 /// NM_001252561 /// NM_010804 /// NR_045538 /// NR_045539	chr2:18064686-18212390 (+) // 98.66 // qA3 chr2:18064686-18212390 (+) // 98.66 // qA3 c	NCBI 38	14.1755	24.8004	55.0127	15.0958	16.9508	17.3087	24.1902	55.1644	17.1342	20.7185	36.0235	14.3455	20.0014	18.796	17.7914	23.1559	26.8424	16.4224	36.53	23.385	17.5366	20.2972	0.734803	-1.36091	-0.444571	0.376003	0.582012	0.449559	-2.2244	-1.15342	0.0335545	0.0982115	1.15213	1.15213	0.204304	0.680405	0.848128	0.863994	-1.15742	-0.210907	0.670737	0.840587	0.611809	-1.6345
1436861_at	Il7	interleukin 7	NM_008371	chr3:7573055-7613770 (-) // 98.19 // qA1 chr3:7572023-7572791 (-) // 97.45 // qA1 chr3:	NCBI 38	92.8337	90.2168	180.369	94.6848	89.7521	152.636	85.1565	248.068	105.592	111.675	194.876	84.4868	125.89	268.477	70.5425	92.5171	114.739	109.059	145.33	131.954	141.871	80.7858	0.789505	-1.26662	-0.34098	0.530328	0.718332	0.750421	-1.33258	-0.414228	0.447558	0.643212	1.63337	1.63337	0.707852	0.203911	0.418827	1.75614	1.75614	0.812408	0.148763	0.340524	0.950496	-1.05208
1440206_at	A930024E05Rik	RIKEN cDNA A930024E05 gene	NM_175405 /// NR_045820	chr5:122989965-122998339 (+) // 70.42 // qF chr5:122989965-122998339 (+) // 70.42 // qF	NCBI 38	68.2005	81.6186	77.2258	68.0066	76.8133	91.9608	106.297	185.231	52.666	73.494	82.2434	74.1631	78.3523	97.1527	88.3428	68.9458	75.471	78.3184	140.319	68.2804	82.6475	78.0442	0.53785	-1.85925	-0.894724	0.00341481	0.0158399	0.558142	-1.79166	-0.841296	0.00513442	0.0219912	0.874894	-1.143	-0.19282	0.454347	0.688679	1.05899	1.05899	0.082689	0.746083	0.883433	1.03773	1.03773
1439248_at	Rmi1	RMI1, RecQ mediated genome instability 1, homolog (S. cerevisiae)	NM_001168248 /// NM_028904 /// NR_031761	chr13:58406583-58410234 (+) // 88.6 // qB1 chr13:58402600-58410092 (+) // 94.27 // qB1	NCBI 38	69.8419	92.4311	130.345	80.2785	92.1117	91.5723	103.762	267.634	65.416	92.5355	129.433	96.6293	93.5341	146.098	71.531	120.118	94.4082	87.8128	166.643	92.1888	109.708	92.6937	0.566527	-1.76514	-0.819783	0.0641008	0.164421	0.526951	-1.89771	-0.924259	0.040065	0.112879	0.994556	-1.00547	-0.00787549	0.984774	0.994503	1.18356	1.18356	0.243133	0.558472	0.768525	0.930143	-1.0751
1436926_at	Esrrb	estrogen related receptor, beta	NM_001159500 /// NM_011934	chr12:86421358-86519187 (+) // 98.88 // qD2 chr12:86520976-86521627 (+) // 100.0 // qD2	NCBI 38	29.1754	20.2076	18.368	24.439	25.2972	17.8195	138.66	170.422	25.4171	24.8448	19.9643	25.1845	24.7122	15.6399	94.836	77.1179	22.124	22.251	153.723	23.274	21.3514	85.5194	0.143921	-6.94824	-2.79665	7.03007e-08	3.65314e-06	0.144747	-6.90859	-2.78839	7.27718e-08	3.79871e-06	0.27215	-3.67445	-1.87753	6.02336e-06	0.000119356	0.249668	-4.00533	-2.00192	3.04023e-06	7.30903e-05	1.00574	1.00574
1426251_at	Cpz	carboxypeptidase Z	NM_153107	chr5:35502213-35525535 (-) // 99.29 // qB2 chr5:35502213-35525535 (-) // 99.29 // qB2	NCBI 38	379.17	412.63	565.109	407.749	445.672	427.37	94.5612	55.3958	316.424	558.883	257.922	307.751	582.599	212.232	51.2456	31.6753	445.503	426.653	72.377	357.297	336.359	40.2903	6.15528	6.15528	2.62182	2.6459e-05	0.000334607	5.89487	5.89487	2.55946	3.35783e-05	0.000404498	8.86804	8.86804	3.14862	3.99085e-06	8.74169e-05	8.34841	8.34841	3.0615	5.37851e-06	0.000112774	0.957693	-1.04418
1433104_at	Pus3	pseudouridine synthase 3	NM_023292	chr9:35564781-35567145 (+) // 97.43 // qA4 chr9:35558594-35566839 (+) // 98.2 // qA4 ch	NCBI 38	38.413	51.7344	62.7126	38.93	73.2599	77.8807	58.2706	63.546	33.6291	55.5345	69.1172	37.5256	74.429	67.0626	34.7966	32.9998	49.9503	60.5611	60.851	50.5385	57.2157	33.8863	0.820858	-1.21824	-0.284795	0.459537	0.658687	0.995232	-1.00479	-0.00689522	0.985556	0.993353	1.49141	1.49141	0.576677	0.146859	0.335197	1.68847	1.68847	0.755717	0.064354	0.18625	1.21243	1.21243
1453864_at	Rdh14	retinol dehydrogenase 14 (all-trans and 9-cis)	NM_023697	chr12:10390781-10395561 (+) // 95.82 // qA1.1 chr12:10390811-10393165 (+) // 87.53 // q	NCBI 38	70.2285	136.238	151.081	109.179	178.349	161.879	256.895	341.259	82.6943	169.767	164.302	122.959	210.887	173.61	168.017	161.843	113.068	146.622	296.09	132.127	165.119	164.9	0.381872	-2.61868	-1.38884	0.00293936	0.0140403	0.495196	-2.0194	-1.01393	0.0193773	0.0639121	0.801249	-1.24805	-0.319677	0.415076	0.655474	1.00132	1.00132	0.0019031	0.996075	0.998333	1.29676	1.29676
1419309_at	Pdpn	podoplanin	NM_010329	chr4:143267427-143299479 (-) // 95.32 // qE1 chr4:143267427-143299479 (-) // 95.32 // q	NCBI 38	12149.3	12275.9	9417.11	12348.6	13049.5	8584.77	662.86	658.127	11552.8	13265.5	7820.75	11464.6	13223.5	8130.3	506.154	267.489	11198.4	11141.8	660.484	10622.2	10721.4	367.951	16.9551	16.9551	4.08365	6.62627e-09	6.0619e-07	16.8697	16.8697	4.07636	6.77046e-09	6.37483e-07	28.8684	28.8684	4.85142	8.15244e-10	1.33219e-07	29.1385	29.1385	4.86485	7.88001e-10	1.31088e-07	0.994963	-1.00506
1425779_a_at	Tbx1	T-box 1	NM_011532	chr16:18581712-18586969 (-) // 92.29 // qA3 chr16:18581712-18586969 (-) // 92.29 // qA3	NCBI 38	44.2081	48.6718	81.7951	43.5013	69.9717	127.438	86.3278	248.785	58.3974	44.6778	93.6216	46.9055	50.7356	118.535	68.976	96.7751	56.0406	72.9305	146.55	62.5106	65.5835	81.7015	0.382397	-2.61508	-1.38686	0.0271119	0.0844223	0.497646	-2.00946	-1.00681	0.0937271	0.216278	0.765109	-1.307	-0.386263	0.499783	0.726521	0.802719	-1.24577	-0.317033	0.578536	0.7823	1.30139	1.30139
1444599_at	Herc4	hect domain and RLD 4	NM_026101 /// NM_030114	chr10:63243804-63317882 (+) // 96.56 // qB4 chr10:63243943-63274433 (+) // 91.73 // qB4	NCBI 38	20.6531	24.6043	34.4938	17.5255	20.2524	24.6259	33.6194	123.381	19.6791	17.9585	33.8025	22.3019	23.5122	31.5309	28.9218	44.5972	25.9764	20.599	64.405	22.8599	25.4755	35.9141	0.40333	-2.47936	-1.30997	0.0123334	0.0450295	0.319837	-3.1266	-1.64459	0.00298184	0.014164	0.636514	-1.57106	-0.651736	0.171847	0.373622	0.709344	-1.40975	-0.495443	0.291515	0.529547	0.792989	-1.26105
1460651_at	Lat	linker for activation of T cells	NM_010689	chr7:126363826-126369540 (-) // 98.1 // qF3 chr7:126363826-126369540 (-) // 98.1 // qF3	NCBI 38	115.591	76.0668	92.5668	119.368	84.3758	101.933	783.053	1080.27	103.006	90.6633	101.467	107.479	93.9301	84.9964	703.347	374.243	93.3663	100.881	919.732	98.2217	95.026	513.052	0.101515	-9.85077	-3.30024	1.23872e-08	9.79933e-07	0.109685	-9.11704	-3.18856	1.86801e-08	1.36325e-06	0.191445	-5.22342	-2.385	5.43099e-07	1.87552e-05	0.185217	-5.39906	-2.43271	4.34321e-07	1.62368e-05	1.08048	1.08048
1442453_at	Fcho2	FCH domain only 2	NM_172591	chr13:98723405-98732673 (-) // 97.81 // qD1 chr13:98751234-98755719 (-) // 82.85 // qD1	NCBI 38	111.148	171.6	277.283	97.8749	181.876	197.712	433.187	908.736	118.087	163.965	459.719	161.346	172.885	357.878	236.086	519.131	174.226	152.111	627.417	207.243	215.32	350.08	0.277689	-3.60115	-1.84846	0.00980249	0.0374156	0.242439	-4.12474	-2.04431	0.00530301	0.0225569	0.591988	-1.68922	-0.75636	0.237416	0.463257	0.615062	-1.62585	-0.701196	0.271544	0.505861	0.873062	-1.14539
1435792_at	Csprs /// Gm15433 /// Gm2666 /// Gm7609 /// LOC100041903 /// LOC100503923	component of Sp100-rs /// predicted pseudogene 15433 /// predicted gene 2666 /// predic	NM_001081746 /// NM_033616 /// XM_001474231 /// XM_001477711 /// XM_003084455 /// XM_00	chr1:85202137-85214420 (+) // 87.36 // qC5 /// chr1:85539027-85551208 (+) // 87.88 // q	NCBI 38	23.0327	33.1655	28.5083	23.1845	34.2527	33.3483	2608.18	2883.7	27.2408	44.7964	70.5446	29.8909	33.4573	58.4848	1581.21	1481.22	27.9255	29.807	2742.55	44.1545	38.8171	1530.41	0.0101826	-98.2068	-6.61775	1.20604e-10	3.32395e-08	0.0108687	-92.0071	-6.52368	1.44062e-10	3.84457e-08	0.0288519	-34.6598	-5.11519	2.85869e-09	3.48459e-07	0.0253643	-39.4254	-5.30106	1.85171e-09	2.52121e-07	1.06738	1.06738
1428992_at	Unc13d	unc-13 homolog D (C. elegans)	NM_001009573	chr11:116062088-116068475 (-) // 98.84 // qE2 chr11:116062088-116068475 (-) // 98.84 //	NCBI 38	136.924	101.588	205.119	159.694	117.085	160.013	534.505	698.28	112.736	103.283	225.939	138.106	103.102	254.796	466.814	249.055	141.832	144.094	610.929	138.046	153.658	340.972	0.232159	-4.3074	-2.10681	0.000336935	0.00247978	0.235861	-4.23978	-2.08399	0.000369838	0.00266399	0.404862	-2.46998	-1.3045	0.0104866	0.0456479	0.450647	-2.21903	-1.14993	0.0206134	0.0787869	1.01595	1.01595
1440671_at	A130012E19Rik	RIKEN cDNA A130012E19 gene	---	chr10:115395306-115395952 (+) // 70.9 // qD2 chr10:115395306-115395952 (+) // 70.9 // q	NCBI 38	72.8651	84.1191	131.673	66.612	85.1774	126.737	92.773	68.3597	57.2716	51.681	138.853	93.2558	68.5211	156.618	44.1257	44.7759	93.1046	89.5903	79.6361	74.3489	100.026	44.4496	1.16912	1.16912	0.225423	0.619482	0.784168	1.12499	1.12499	0.169912	0.707588	0.840681	1.67266	1.67266	0.742144	0.118032	0.287819	2.25033	2.25033	1.17014	0.020505	0.0784655	0.962253	-1.03923
1422303_a_at	Tnfrsf18	tumor necrosis factor receptor superfamily, member 18	NM_009400 /// NM_021985	chr4:156026341-156028889 (+) // 83.6 // qE2 chr4:156026341-156028889 (+) // 83.6 // qE2	NCBI 38	104.512	85.3649	112.11	107.852	86.7761	93.2932	905.989	1657.91	100.015	150.461	98.2883	83.3909	114.257	147.501	716.195	653.503	100.007	95.5776	1225.62	113.938	112.013	684.136	0.0815993	-12.255	-3.6153	1.16424e-08	9.35979e-07	0.0779853	-12.8229	-3.68065	9.39298e-09	8.19263e-07	0.166542	-6.00449	-2.58604	5.74965e-07	1.94953e-05	0.163729	-6.10765	-2.61062	5.16899e-07	1.84874e-05	0.95571	-1.04634
1434786_at	Ppp1r12b	protein phosphatase 1, regulatory (inhibitor) subunit 12B	NM_001081307 /// NR_015606	chr1:134947948-134955942 (-) // 75.0 // qE4 chr1:134754658-134756307 (-) // 99.7 // qE4	NCBI 38	869.224	801.944	898.35	881.93	750.911	867.36	356.683	344.321	961.422	1066.03	696.434	848.337	1088.1	821.271	233.797	163.815	855.557	831.28	350.454	893.702	911.829	195.704	2.44129	2.44129	1.28764	2.43586e-05	0.000314333	2.37201	2.37201	1.24611	3.3715e-05	0.000406029	4.56659	4.56659	2.19112	7.27102e-08	4.02863e-06	4.65923	4.65923	2.22009	6.23578e-08	3.5555e-06	0.971623	-1.02921
1437199_at	Dusp5	dual specificity phosphatase 5	NM_001085390	chr19:53529156-53542413 (+) // 92.94 // qD2 chr19:53529156-53542413 (+) // 92.94 // qD2	NCBI 38	804.031	808.495	1196.8	666.549	521.754	795.923	2515.59	2374.6	721.672	772.531	729.104	616.685	674.266	668.736	3090.81	603.016	919.726	651.694	2444.12	740.769	652.693	1365.2	0.376308	-2.6574	-1.41001	0.00978499	0.0373709	0.266643	-3.75033	-1.90702	0.00128901	0.00721285	0.542601	-1.84297	-0.882036	0.0808032	0.218431	0.478085	-2.09168	-1.06466	0.0397912	0.130092	0.708578	-1.41128
1434939_at	Foxf1	forkhead box F1	NM_010426	chr8:121084437-121087052 (+) // 94.25 // qE1 chr8:121087527-121088150 (+) // 89.57 // q	NCBI 38	1114.43	1100.92	529.429	1137.04	1109.69	676.76	194.212	99.7752	970.255	1241.3	479.387	972.332	1267.88	554.797	119.66	50.5724	866.04	948.714	139.203	832.692	881.062	77.7915	6.22142	6.22142	2.63724	0.000239126	0.00188678	6.81533	6.81533	2.76878	0.000154844	0.00133811	10.7041	10.7041	3.42009	2.04747e-05	0.000313772	11.326	11.326	3.50157	1.61365e-05	0.000265416	1.09546	1.09546
1417282_at	Mmp23	matrix metallopeptidase 23	NM_011985	chr4:155650655-155653384 (-) // 97.67 // qE2 chr4:155650655-155653384 (-) // 97.67 // q	NCBI 38	2866.47	3331.58	2126.77	3403.67	3866.53	2432.56	272.342	231.43	3032.13	3400.49	1204.46	3190.95	3882.71	1215.61	178.236	110.577	2728.51	3175.35	251.06	2315.81	2469.49	140.391	10.8677	10.8677	3.44197	1.11898e-05	0.000171016	12.6475	12.6475	3.66078	5.88288e-06	0.000104212	16.4955	16.4955	4.044	2.02203e-06	5.14647e-05	17.5905	17.5905	4.13672	1.57794e-06	4.39301e-05	1.16378	1.16378
1459885_s_at	Cox7c /// LOC100048613	cytochrome c oxidase subunit VIIc /// cytochrome c oxidase subunit 7C, mitochondrial-li	NM_007749 /// XM_003946087	chr11:75599632-75600454 (-) // 74.08 // qB5 chr13:86044827-86045678 (-) // 94.72 // qC3	NCBI 38	128.11	172.005	324.82	112.275	142.875	265.287	291.24	349.672	93.0999	158.254	253.507	146.63	155.076	261.872	176.115	180.914	192.718	162.051	319.121	155.154	181.253	178.499	0.603902	-1.6559	-0.727614	0.14581	0.304749	0.507803	-1.96927	-0.977659	0.0580725	0.150222	0.869221	-1.15046	-0.202205	0.674121	0.844543	1.01543	1.01543	0.0220908	0.963225	0.984794	0.84087	-1.18924
1448713_at	Stat4	signal transducer and activator of transcription 4	NM_011487	chr1:52008245-52107188 (+) // 99.07 // qC1.1 chr1:52008245-52107188 (+) // 99.07 // qC1	NCBI 38	73.218	90.6748	88.9728	100.723	96.2178	101.293	1048.61	1572.67	85.4946	51.4927	95.9926	107.236	68.9842	102.052	969.803	532	83.903	99.3853	1284.15	75.0417	91.0477	718.289	0.0653381	-15.305	-3.93593	1.04142e-08	8.53983e-07	0.0773948	-12.9208	-3.69162	2.23703e-08	1.55219e-06	0.104473	-9.57185	-3.2588	9.69538e-08	5.0031e-06	0.126757	-7.88911	-2.97986	2.72045e-07	1.15207e-05	1.18453	1.18453
1457233_at	Dnaja2	DnaJ (Hsp40) homolog, subfamily A, member 2	NM_019794	chr8:85537631-85555345 (-) // 93.14 // qC3 chr8:85537631-85555345 (-) // 93.14 // qC3 c	NCBI 38	158.411	255.933	262.023	112.236	200.298	172.637	278.223	442.722	116.346	246.746	346.172	195.872	265.469	249.403	163.417	235.865	219.822	157.146	350.967	214.989	234.932	196.318	0.626334	-1.59659	-0.674996	0.125737	0.273439	0.447752	-2.23338	-1.15923	0.0148103	0.0517599	1.09511	1.09511	0.131076	0.755617	0.89091	1.19669	1.19669	0.259049	0.540668	0.755098	0.714877	-1.39884
1453384_at	Dennd1b	DENN/MADD domain containing 1B	NM_001166501 /// NM_181347 /// NM_183217	chr1:139172959-139176045 (+) // 96.83 // qE4 chr1:139126074-139170556 (+) // 81.09 // q	NCBI 38	31.3047	44.8504	77.4768	44.3157	42.1915	59.8386	126.694	152.242	50.0724	51.1991	67.3758	52.8312	43.5983	76.0574	66.0784	91.3936	47.7365	48.1859	138.882	55.6913	55.9544	77.7117	0.343719	-2.90935	-1.5407	0.000531493	0.00356762	0.346957	-2.8822	-1.52717	0.000571615	0.00376631	0.71664	-1.3954	-0.48068	0.176903	0.380712	0.720023	-1.38885	-0.473885	0.182673	0.391017	1.00942	1.00942
1443657_at	Fhdc1	FH2 domain containing 1	NM_001033301 /// NM_001205355	chr3:84444034-84479471 (-) // 94.09 // qF1 chr3:84452845-84453285 (-) // 96.83 // qF1 c	NCBI 38	102.067	85.3649	152.276	83.1602	77.0532	140.575	61.5766	50.8615	72.1045	79.5736	92.0283	78.4254	76.28	94.3458	31.8694	30.7753	109.883	96.5765	55.9633	80.8261	82.6412	31.3176	1.9635	1.9635	0.973428	0.00309535	0.014613	1.72571	1.72571	0.78719	0.0116801	0.0428037	2.58085	2.58085	1.36785	0.000209992	0.00199555	2.63881	2.63881	1.39989	0.00017073	0.00174507	0.878899	-1.13779
1443378_s_at	Adam1a /// Mapkapk5	a disintegrin and metallopeptidase domain 1a /// MAP kinase-activated protein kinase 5	NM_010765 /// NM_172126	chr5:121525050-121545892 (-) // 88.53 // qF chr5:121518603-121520654 (-) // 96.11 // qF	NCBI 38	171.86	131.024	172.644	145.797	164.062	172.325	269.334	280.235	147.332	146.811	164.774	165.61	157.826	153.548	154.3	153.402	157.237	160.338	274.73	152.751	158.917	153.85	0.572335	-1.74723	-0.805068	6.66913e-05	0.00068897	0.58362	-1.71344	-0.776899	9.32889e-05	0.000895196	0.992855	-1.0072	-0.0103451	0.941882	0.979077	1.03294	1.03294	0.0467565	0.742569	0.881495	1.01972	1.01972
1431218_at	Zdhhc20	zinc finger, DHHC domain containing 20	NM_029492	chr14:57888902-57890460 (-) // 87.07 // qC3 chr14:57888902-57890460 (-) // 87.07 // qC3	NCBI 38	30.4832	47.6525	60.4196	29.1515	37.3904	34.7249	72.4492	90.1749	31.5479	44.1331	46.9004	32.9536	42.6314	40.1228	47.5885	43.0981	44.4401	33.5753	80.8278	40.2691	38.3419	45.2878	0.549813	-1.8188	-0.862987	0.00548004	0.0233914	0.415395	-2.40735	-1.26744	0.00030313	0.00226875	0.889182	-1.12463	-0.169449	0.524471	0.744591	0.846631	-1.18115	-0.240195	0.37079	0.611933	0.75552	-1.32359
1441617_at	Med15	mediator complex subunit 15	NM_001040683 /// NM_033609	chr16:17682274-17682907 (-) // 46.92 // qA3 chr16:17682274-17682907 (-) // 46.92 // qA3	NCBI 38	79.9743	89.7951	134.632	62.8607	81.0927	120.877	112.85	221.486	63.6333	86.7345	156.845	87.6513	93.2695	124.36	63.0558	124.504	98.8795	85.0925	158.095	95.303	100.551	88.6034	0.625445	-1.59886	-0.677045	0.141259	0.297851	0.538236	-1.85792	-0.893689	0.0592566	0.15251	1.07561	1.07561	0.105155	0.811444	0.92105	1.13484	1.13484	0.182489	0.679601	0.845723	0.860565	-1.16203
1415951_at	Fkbp10	FK506 binding protein 10	NM_001163481 /// NM_010221	chr11:100415556-100424840 (+) // 98.9 // qD chr11:100415556-100424840 (+) // 98.9 // qD	NCBI 38	2887.85	2659.83	2664.13	2640.4	2376.55	2663.31	148.573	136.122	2883.23	3627.93	2243.05	2439.23	3443.84	2426.22	73.7214	86.2231	2735.33	2556.76	142.213	2862.78	2731.54	79.7283	19.2338	19.2338	4.26557	1.85172e-11	8.03022e-09	17.978	17.978	4.16816	2.47261e-11	1.01379e-08	35.9072	35.9072	5.1662	1.66271e-12	1.19031e-09	34.2608	34.2608	5.09849	1.9641e-12	1.26547e-09	0.934709	-1.06985
1429348_at	Sema3c	sema domain, immunoglobulin domain (Ig), short basic domain, secreted, (semaphorin) 3C	NM_013657	chr5:17574616-17727987 (+) // 99.76 // qA3 chr5:17727706-17730267 (+) // 90.55 // qA3 c	NCBI 38	1312.98	1298.32	1078.32	1592.39	1569.68	1157.83	1082.38	554.925	1060.09	836.969	985.567	1294.03	1097.19	1192.07	615.817	306.735	1224.94	1425.05	775.015	956.261	1191.7	434.617	1.58058	1.58058	0.660454	0.0463083	0.128242	1.83876	1.83876	0.878733	0.011755	0.0430152	2.20024	2.20024	1.13766	0.0022592	0.013428	2.74203	2.74203	1.45524	0.000322965	0.00289238	1.16334	1.16334
1431316_at	Itch	itchy, E3 ubiquitin protein ligase	NM_001243712 /// NM_008395	chr2:155133509-155226854 (+) // 96.8 // qH1 chr2:155133536-155139289 (+) // 48.53 // qH	NCBI 38	20.0624	36.4924	51.8398	19.5254	34.7217	26.9951	39.5342	128.297	25.4737	35.1738	64.2956	34.9259	34.8677	42.8139	37.7407	42.276	33.6061	26.3529	71.219	38.6217	37.3581	39.9441	0.471869	-2.11923	-1.08354	0.0501742	0.136443	0.370027	-2.70251	-1.4343	0.0135143	0.0480609	0.966893	-1.03424	-0.0485719	0.924324	0.970955	0.935261	-1.06922	-0.0965591	0.850301	0.934851	0.784172	-1.27523
1441162_at	Rock1	Rho-associated coiled-coil containing protein kinase 1	NM_009071	chr18:10064404-10182245 (-) // 98.26 // qA1 chr18:10064404-10182245 (-) // 98.26 // qA1	NCBI 38	35.8436	44.5128	72.5774	35.8436	48.4868	63.2279	59.8129	116.458	31.4138	43.2137	65.3109	41.1198	39.0671	73.0023	37.4983	58.4775	48.7415	47.8976	83.461	44.5904	48.9477	46.8274	0.584005	-1.71231	-0.775947	0.0892361	0.21096	0.573894	-1.74248	-0.801144	0.0803864	0.192979	0.952231	-1.05017	-0.0706165	0.86974	0.947972	1.04528	1.04528	0.0638894	0.882039	0.949492	0.982687	-1.01762
1430302_at	Cnrip1	cannabinoid receptor interacting protein 1	NM_029861	chr11:17051855-17053104 (+) // 99.84 // qA2 chr11:17051855-17053104 (+) // 99.84 // qA2	NCBI 38	149.273	139.968	223.362	180.323	174.159	211.84	240.86	354.773	103.917	135.479	280.026	203.802	189.726	200.365	150.301	179.349	167.113	188.077	292.319	157.974	197.87	164.184	0.571681	-1.74923	-0.806718	0.03226	0.0966942	0.643394	-1.55426	-0.636226	0.0810883	0.19422	0.962179	-1.03931	-0.0556228	0.871123	0.948587	1.20518	1.20518	0.269249	0.4376	0.671824	1.12544	1.12544
1460159_at	Mysm1	myb-like, SWIRM and MPN domains 1	NM_177239	chr4:94942039-94943802 (-) // 80.57 // qC5 chr4:94945294-94945982 (+) // 97.12 // qC5 c	NCBI 38	28.0107	33.9332	42.1785	21.005	26.0673	29.1469	33.9729	90.8339	24.935	26.1542	29.9414	30.166	25.6543	38.5042	33.4129	29.1392	34.2253	25.1769	55.5506	26.9283	31.0024	31.2029	0.616108	-1.62309	-0.698745	0.0534926	0.143426	0.453224	-2.20641	-1.1417	0.00418405	0.0186154	0.863001	-1.15875	-0.212566	0.529217	0.747813	0.993571	-1.00647	-0.00930503	0.97785	0.990429	0.735625	-1.35939
1441724_at	Stag1	stromal antigen 1	NM_009282	chr9:100643449-100958062 (+) // 99.74 // qE3.3 chr9:100643449-100958062 (+) // 99.74 //	NCBI 38	45.4506	36.4921	43.589	37.9503	33.0645	39.5136	82.1204	135.18	44.5135	36.0279	47.7299	44.6657	39.6328	57.2104	54.1817	64.6433	41.6585	36.7375	105.362	42.4593	46.6123	59.1821	0.395387	-2.52917	-1.33866	4.3818e-05	0.000495049	0.348679	-2.86797	-1.52003	1.2293e-05	0.000184871	0.717435	-1.39385	-0.47908	0.0501629	0.153695	0.787608	-1.26967	-0.34445	0.144505	0.333658	0.881867	-1.13396
1453322_at	Wdr33	WD repeat domain 33	NM_001170966 /// NM_001170967 /// NM_001170970 /// NM_028866	chr18:31888503-31907968 (+) // 98.96 // qB1 chr18:31804056-31834793 (+) // 100.0 // qB1	NCBI 38	73.4767	76.2946	81.587	78.3589	64.0763	85.9883	125.297	151.612	92.2875	68.3046	74.9155	81.4211	61.7339	79.5145	81.1897	73.8268	77.0466	75.5804	137.828	77.8735	73.6605	77.4208	0.559007	-1.78889	-0.839062	0.000418016	0.00294854	0.548366	-1.8236	-0.866789	0.00031676	0.00234661	1.00584	1.00584	0.00840083	0.963062	0.98711	0.951433	-1.05105	-0.071826	0.69324	0.854137	0.980965	-1.0194
1437121_at	Dennd1c	DENN/MADD domain containing 1C	NM_153551	chr17:57072168-57078514 (-) // 67.04 // qD chr17:57065904-57071679 (-) // 99.44 // qD c	NCBI 38	128.562	127.39	318.841	158.182	109.069	328.873	610.316	1066.14	116.524	84.178	440.756	208.984	107.098	382.264	475.123	432.189	173.49	178.359	806.651	162.906	204.527	453.148	0.215075	-4.64954	-2.21709	0.00836057	0.0329204	0.221111	-4.52261	-2.17716	0.00930787	0.0356968	0.359498	-2.78165	-1.47594	0.0590231	0.173186	0.451348	-2.21559	-1.14769	0.131518	0.311794	1.02807	1.02807
1442107_at	Flnb	filamin, beta	NM_134080	chr14:7926801-7951588 (+) // 95.84 // qA1 chr14:7920568-7921262 (+) // 70.89 // qA1 chr	NCBI 38	170.235	203.543	415.654	162.547	163.834	260.834	145.181	326.11	159.479	259.37	407.885	205.092	226.239	381.138	111.673	133.981	243.301	190.802	217.589	256.48	260.534	122.319	1.11817	1.11817	0.16114	0.739508	0.862291	0.87689	-1.14039	-0.189532	0.69598	0.833694	2.09681	2.09681	1.0682	0.0424385	0.13564	2.12996	2.12996	1.09083	0.0388622	0.127769	0.784218	-1.27516
1447901_x_at	Sfi1	Sfi1 homolog, spindle assembly associated (yeast)	NM_030207	chrUn_JH584304:28051-52732 (+) // 96.69 // /// chr11:3131883-3156865 (-) // 97.39 // qA	NCBI 38	149.941	211.391	232.122	194.268	219.948	244.297	314.905	685.285	153.735	218.419	228.158	190.157	225.946	224.032	244.855	278.672	194.495	218.547	464.544	197.136	212.72	261.218	0.41868	-2.38846	-1.25608	0.000830615	0.00509889	0.470458	-2.12559	-1.08786	0.00245363	0.0120849	0.754683	-1.32506	-0.406057	0.184805	0.39208	0.814343	-1.22798	-0.296292	0.325404	0.565336	1.12367	1.12367
1445724_at	Iqgap1	IQ motif containing GTPase activating protein 1	NM_016721	chr7:80712175-80803295 (-) // 97.25 // qD3 chr7:80712175-80803295 (-) // 97.25 // qD3 c	NCBI 38	88.2317	74.9853	115.628	81.0426	63.306	135.936	132.831	159.239	68.9444	80.8793	123.44	77.6491	82.9557	101.003	83.0181	80.6145	91.4582	88.6814	145.437	88.2938	86.6501	81.808	0.628848	-1.59021	-0.669217	0.0489855	0.133877	0.609755	-1.64	-0.713698	0.037552	0.107172	1.07929	1.07929	0.110083	0.726423	0.874901	1.05919	1.05919	0.0829614	0.791759	0.906737	0.969638	-1.03131
1430131_at	Cr1l	complement component (3b/4b) receptor 1-like	NM_013499	chr1:195103791-195131565 (-) // 87.41 // qH6 chr1:195126135-195131517 (-) // 39.7 // qH	NCBI 38	54.9812	62.9088	78.6476	56.0341	67.2408	75.2687	108.194	240.107	55.8336	61.788	92.7042	70.6082	71.354	79.4799	89.7548	91.6894	64.7945	65.7004	161.178	68.386	73.7075	90.7169	0.402006	-2.48752	-1.31471	0.00067344	0.00430332	0.407627	-2.45323	-1.29468	0.000762243	0.00471382	0.753838	-1.32654	-0.407674	0.191213	0.401199	0.812497	-1.23077	-0.299566	0.329375	0.56949	1.01398	1.01398
1438501_at	Rps17	ribosomal protein S17	NM_009092	chr12:118602809-118603113 (+) // 89.78 // qF2 chr7:81342734-81344549 (-) // 99.76 // qD	NCBI 38	181.237	232.235	281.401	173.136	229.921	234.538	199.48	285.731	150.131	261.076	252.916	234.405	195.359	231.157	105.723	170.786	227.945	210.568	238.742	214.818	219.566	134.373	0.954771	-1.04737	-0.0667733	0.820386	0.909317	0.88199	-1.1338	-0.181166	0.540418	0.720915	1.59867	1.59867	0.676872	0.0354446	0.118055	1.63401	1.63401	0.708417	0.0288942	0.101976	0.923771	-1.08252
1458274_at	Zfp69	zinc finger protein 69	NM_001005788	chr4:120930138-120930625 (-) // 77.66 // qD2.2 chr4:120930138-120930625 (-) // 77.66 //	NCBI 38	55.885	69.317	65.6848	67.399	73.2903	78.2229	268.985	305.807	67.6069	72.8596	63.09	65.3244	61.847	81.3986	147.551	176.625	63.3674	72.836	286.806	67.735	69.0247	161.435	0.220942	-4.52607	-2.17826	3.7956e-09	4.03739e-07	0.253955	-3.9377	-1.97736	1.21698e-08	9.81879e-07	0.41958	-2.38333	-1.25298	2.28749e-06	5.66168e-05	0.427569	-2.33881	-1.22577	2.90111e-06	7.03654e-05	1.14942	1.14942
1443641_at	Fermt3	fermitin family homolog 3 (Drosophila)	NM_153795	chr19:6998975-7019469 (-) // 96.62 // qA chr19:6998975-7019469 (-) // 96.62 // qA chr19	NCBI 38	107.061	84.1695	191.333	94.5447	87.1432	174.526	194.916	404.309	87.8694	74.4951	275.146	135.096	79.6216	239.602	118.776	210.49	119.911	112.869	280.724	121.668	137.105	158.118	0.427148	-2.34111	-1.22719	0.065849	0.167644	0.402065	-2.48716	-1.3145	0.0508651	0.135752	0.769477	-1.29958	-0.37805	0.546514	0.759813	0.867109	-1.15326	-0.205715	0.741548	0.880977	0.941279	-1.06238
1440315_at	Mbnl1	muscleblind-like 1 (Drosophila)	NM_001253708 /// NM_001253709 /// NM_001253710 /// NM_001253711 /// NM_001253713 /// NM	chr3:60529148-60629748 (+) // 95.76 // qD chr3:60616826-60617479 (+) // 97.59 // qD chr	NCBI 38	26.0988	27.1821	34.8838	24.0719	23.7212	22.4452	35.8151	110.79	29.0509	28.4002	44.8689	29.4521	29.8392	31.0328	36.0895	34.8838	29.1412	23.4022	62.9917	33.3279	30.1006	35.4816	0.462621	-2.16159	-1.1121	0.00697059	0.0284199	0.371513	-2.6917	-1.42852	0.00123804	0.00698399	0.939306	-1.06462	-0.0903329	0.798638	0.914327	0.848346	-1.17876	-0.237275	0.506043	0.728519	0.803061	-1.24524
1426002_a_at	Cdc7	cell division cycle 7 (S. cerevisiae)	NM_001271566 /// NM_001271567 /// NM_001271568 /// NM_009863	chr5:106964321-106984431 (+) // 99.69 // qE5 chr5:106964321-106984431 (+) // 99.69 // q	NCBI 38	358.666	514.444	431.797	323.672	450.512	510.881	208.604	297.45	351.281	610.322	420.018	376.716	417.872	417.435	144.73	136.127	430.297	420.768	249.096	448.222	403.535	140.356	1.72743	1.72743	0.788627	0.00824297	0.032534	1.68918	1.68918	0.756323	0.0105277	0.0394229	3.19346	3.19346	1.67512	1.74717e-05	0.000276586	2.87508	2.87508	1.5236	4.47686e-05	0.000603079	0.977855	-1.02265
1439200_x_at	Rhox4b	reproductive homeobox 4B	NM_021300	chrY:90793125-90822400 (+) // 33.69 // qE chrY:90793125-90822400 (+) // 33.69 // qE	NCBI 38	678.797	592.015	647.484	514.128	554.785	720.587	636.037	727.272	402.273	165.225	374.757	613.533	138.26	423.235	369.348	397.818	638.401	590.114	680.141	292.052	329.89	383.295	0.938637	-1.06537	-0.0913608	0.857585	0.930056	0.867635	-1.15256	-0.20484	0.688222	0.828187	0.761951	-1.31242	-0.39223	0.44574	0.681515	0.860671	-1.16188	-0.216466	0.671361	0.840908	0.924357	-1.08183
1428383_a_at	Zswim8	zinc finger SWIM-type containing 8	NM_001252081 /// NM_001252082 /// NM_027996	chr14:20721167-20723619 (+) // 98.59 // qA3 chr14:20721167-20723619 (+) // 98.59 // qA3	NCBI 38	639.055	679.298	958.5	618.548	621.11	1012.45	1019.26	1959.27	506.757	875.232	877.456	625.623	983.82	904.87	813.469	780.33	746.558	729.968	1413.15	730.1	822.738	796.726	0.528298	-1.89287	-0.920576	0.0178995	0.0606069	0.516559	-1.93589	-0.952995	0.014924	0.0520522	0.916375	-1.09126	-0.12599	0.716467	0.868744	1.03265	1.03265	0.0463514	0.893399	0.953862	0.977779	-1.02273
1458550_at	Myo1d	myosin ID	NM_177390	chr11:80482125-80586960 (-) // 99.21 // qB5 chr11:80673250-80674459 (-) // 71.69 // qB5	NCBI 38	105.98	117.665	157.609	98.2689	107.405	207.435	126.111	135.019	105.57	115.375	174.534	103.618	120.866	174.221	68.3164	79.3079	125.262	129.85	130.49	128.582	129.701	73.6075	0.959939	-1.04173	-0.0589854	0.858958	0.930564	0.995099	-1.00493	-0.00708803	0.982953	0.992059	1.74686	1.74686	0.804764	0.0281335	0.0987507	1.76207	1.76207	0.817271	0.0261732	0.0945256	1.03663	1.03663
1427526_at	Fgfr1op2	FGFR1 oncogene partner 2	NM_026218	chr6:146577910-146599198 (+) // 98.38 // qG3 chr6:146577954-146587301 (+) // 55.57 // q	NCBI 38	90.7117	186.071	296.654	95.0912	168.869	178.007	211.804	447.874	103.923	189.503	348.911	179.844	190.98	263.592	129.818	232.544	171.079	141.92	307.996	190.114	208.42	173.748	0.55546	-1.80031	-0.848245	0.151231	0.31276	0.460784	-2.17021	-1.11784	0.0657815	0.165513	1.0942	1.0942	0.129876	0.81894	0.924839	1.19956	1.19956	0.262505	0.644669	0.82532	0.829554	-1.20547
1457466_at	AA409368	expressed sequence AA409368	---	chr2:3124594-3125350 (+) // 90.61 // qA1 chr2:3124594-3125350 (+) // 90.61 // qA1	NCBI 38	30.2763	29.7744	35.5076	26.4914	32.6886	41.3948	83.4916	179.152	31.7347	34.2034	28.5815	33.1466	33.2019	33.9275	53.1982	89.5941	31.7521	32.975	122.306	31.4217	33.4244	69.04	0.259613	-3.85189	-1.94557	1.61443e-05	0.000226561	0.269611	-3.70904	-1.89105	2.15079e-05	0.000286767	0.455125	-2.1972	-1.13567	0.00187424	0.0115954	0.484133	-2.06555	-1.04652	0.00334217	0.0188725	1.03851	1.03851
1418666_at	Ptx3	pentraxin related gene	NM_008987	chr3:66219906-66225805 (+) // 94.38 // qE1 chr3:66219906-66225805 (+) // 94.38 // qE1 c	NCBI 38	4105.17	4317.36	540.922	4204.08	3936.4	544.941	86.6896	125.294	3701.21	6594.61	415.167	3460.73	5688.13	1352.66	63.7724	54.2979	2124.34	2081.49	104.219	2164.02	2986.21	58.8447	20.3836	20.3836	4.34934	0.00345193	0.0159737	19.9721	19.9721	4.31991	0.0036145	0.0165517	36.7744	36.7744	5.20063	0.000928985	0.00660333	50.7459	50.7459	5.66522	0.00046347	0.00388531	0.979814	-1.0206
1456845_at	Oxa1l	oxidase assembly 1-like	NM_026936	chr14:54360842-54369452 (+) // 89.86 // qC2 chr14:54360842-54369452 (+) // 89.86 // qC2	NCBI 38	80.7437	90.9759	65.6247	75.7328	75.7771	67.079	80.8985	143.644	60.2568	85.9608	94.6029	78.0227	77.6457	101.812	54.7623	67.7164	78.395	72.7452	107.799	78.8391	85.1226	60.8793	0.727233	-1.37507	-0.45951	0.0945228	0.220431	0.674822	-1.48187	-0.567421	0.044195	0.121739	1.29502	1.29502	0.372974	0.16712	0.366979	1.39823	1.39823	0.483602	0.0802007	0.218888	0.92793	-1.07767
1429968_at	Jkamp	JNK1/MAPK8-associated membrane protein	NM_001205067 /// NM_024205	chr12:72085854-72101527 (+) // 83.19 // qC3 chr12:72085970-72087332 (+) // 69.11 // qC3	NCBI 38	54.2114	94.9284	98.7788	70.7008	99.7978	87.0791	74.9759	109.092	56.1522	90.0965	129.891	74.2246	99.8574	85.3024	39.5421	65.9875	79.8085	85.0129	90.4394	86.9395	85.8282	51.0812	0.882455	-1.1332	-0.180405	0.623111	0.786566	0.940002	-1.06383	-0.0892643	0.807185	0.900812	1.70199	1.70199	0.767223	0.0519948	0.157765	1.68023	1.68023	0.748659	0.0571161	0.170528	1.06521	1.06521
1419412_at	Xcl1	chemokine (C motif) ligand 1	NM_008510	chr1:164931641-164935522 (-) // 99.81 // qH2.2 chr1:164931641-164935522 (-) // 99.81 //	NCBI 38	99.9637	108	85.4922	113.671	98.0874	92.1082	1677.61	1102.05	126.287	104.508	92.9866	115.749	120.075	102.219	1697.11	347.547	97.3636	100.891	1359.73	107.064	112.417	768.004	0.0716063	-13.9653	-3.80377	1.44798e-06	3.64021e-05	0.0742006	-13.477	-3.75243	1.68088e-06	4.09117e-05	0.139406	-7.17331	-2.84264	3.05982e-05	0.000429775	0.146376	-6.8317	-2.77225	3.9152e-05	0.000543155	1.03623	1.03623
1442358_at	AA409587	expressed sequence AA409587	---	chr7:99965813-99966767 (-) // 87.94 // qE2 chr7:99965813-99966767 (-) // 87.94 // qE2	NCBI 38	66.8527	67.6361	136.297	67.703	63.1575	84.0538	154.86	174.857	123.952	77.148	113.406	108.192	70.3403	88.8542	98.5461	87.6882	85.0996	71.0991	164.555	102.74	87.7727	92.9588	0.51715	-1.93367	-0.951345	0.00784588	0.0312208	0.432068	-2.31445	-1.21067	0.00153958	0.00831374	1.10522	1.10522	0.144334	0.641303	0.824545	0.94421	-1.05909	-0.0828203	0.788615	0.904768	0.835478	-1.19692
1423935_x_at	Krt14	keratin 14	NM_016958	chr11:100203161-100207649 (-) // 91.0 // qD chr11:100203161-100207649 (-) // 91.0 // qD	NCBI 38	138.989	221.172	66.7499	145.11	184.411	50.0051	132.672	63.1682	148	243.7	67.1124	141.696	229.297	58.8734	60.6486	44.108	127.073	110.196	91.5463	134.269	124.134	51.7218	1.38807	1.38807	0.47308	0.524978	0.713893	1.20372	1.20372	0.2675	0.717776	0.847041	2.59598	2.59598	1.37628	0.0799594	0.216709	2.40005	2.40005	1.26306	0.104898	0.266222	0.867188	-1.15315
1458462_at	Arhgap30	Rho GTPase activating protein 30	NM_001005508	chr1:171408330-171410711 (+) // 81.09 // qH3 chr1:171407497-171408285 (+) // 99.14 // q	NCBI 38	70.6482	71.4728	171.086	73.8263	78.7828	112.29	208.707	245.021	71.0265	62.2987	248.77	126.287	67.1165	191.382	97.9924	166.666	95.2396	86.7457	226.136	103.252	117.498	127.797	0.421161	-2.37439	-1.24756	0.053915	0.144173	0.3836	-2.60688	-1.38233	0.0354192	0.102508	0.807941	-1.23771	-0.307678	0.609737	0.80451	0.919412	-1.08765	-0.121217	0.839921	0.929806	0.910816	-1.09792
1430719_at	4833447P13Rik	RIKEN cDNA 4833447P13 gene	---	chr6:108656916-108659713 (-) // 77.12 // qE2 chr6:108656916-108659713 (-) // 77.12 // q	NCBI 38	49.2244	50.0244	46.4597	56.586	53.9628	49.0258	112.032	183.535	57.1766	50.2044	45.1388	63.9696	52.1031	59.2049	71.5835	91.7514	48.5453	53.0978	143.394	50.6023	58.2191	81.0427	0.338544	-2.95382	-1.56258	2.40284e-06	5.26837e-05	0.370293	-2.70056	-1.43326	6.05319e-06	0.000106435	0.624391	-1.60156	-0.679478	0.00413398	0.0217895	0.718376	-1.39203	-0.477189	0.0297486	0.104282	1.09378	1.09378
1438834_at	Mospd2	motile sperm domain containing 2	NM_029730	chrX:164936175-164980328 (-) // 98.29 // qF5 chrX:164955833-164956493 (-) // 80.78 // q	NCBI 38	59.1207	73.7302	122.86	53.6394	68.3884	82.5527	68.8509	131.44	68.1496	62.5892	141.823	78.3174	74.8577	122.585	44.9563	64.2903	81.199	67.1437	95.1143	84.5692	89.553	53.7566	0.853699	-1.17137	-0.228201	0.5905	0.763121	0.705929	-1.41657	-0.502405	0.246333	0.435544	1.57319	1.57319	0.653693	0.138344	0.322136	1.6659	1.6659	0.736302	0.0986275	0.254719	0.826905	-1.20933
1442087_at	H3f3a	H3 histone, family 3A	NM_008210	chr1:180806317-180806783 (-) // 9.06 // qH4 chr1:180806317-180806783 (-) // 9.06 // qH4	NCBI 38	114.548	131.961	174.78	117.195	118.787	122.491	250.683	337.11	109.204	110.723	167.454	130.704	107.131	166.328	189.711	142.418	138.243	119.47	290.703	126.505	132.553	164.372	0.475547	-2.10284	-1.07234	0.000881314	0.00535328	0.410972	-2.43326	-1.28289	0.000194504	0.00160302	0.769624	-1.29934	-0.377774	0.153849	0.346193	0.806423	-1.24004	-0.310391	0.235222	0.461588	0.864208	-1.15713
1437777_at	Atf2 /// LOC100047997	activating transcription factor 2 /// cyclic AMP-dependent transcription factor ATF-2-l	NM_001025093 /// NM_009715 /// XM_001479504	chr2:73816510-73892628 (-) // 93.33 // qC3 chr2:73816510-73892628 (-) // 93.33 // qC3 c	NCBI 38	23.0587	28.1184	25.6448	22.6804	25.1558	20.9889	31.9358	40.7646	19.7464	23.5493	28.3488	21.5772	21.915	26.4814	20.8255	19.9923	25.5236	22.8785	36.0811	23.623	23.2217	20.4047	0.707393	-1.41364	-0.499416	0.013364	0.047992	0.634083	-1.57708	-0.657256	0.00237116	0.0117647	1.15772	1.15772	0.211286	0.247064	0.475478	1.13805	1.13805	0.186564	0.303944	0.542101	0.896366	-1.11562
1437636_at	Pydc4	pyrin domain containing 4	NM_001033384 /// NM_001177349 /// NM_001177350	--- --- chr1:173591956-173592673 (-) // 99.86 // qH3 /// chr1:173483560-173484275 (-) /	NCBI 38	16.1321	26.4264	85.18	23.2263	21.0035	68.1053	1121.85	1486.19	24.4493	25.9181	162.786	24.7663	27.8817	127.187	576.188	926.698	33.1147	32.1478	1291.2	46.8988	44.4503	730.687	0.025646	-38.9925	-5.28512	8.49825e-05	0.000834777	0.024897	-40.1655	-5.32788	7.87785e-05	0.000783114	0.0641844	-15.5801	-3.96163	0.00101963	0.00711642	0.0608334	-16.4384	-4.03899	0.000875768	0.00648359	0.970797	-1.03008
1430932_at	Slc9a8	solute carrier family 9 (sodium/hydrogen exchanger), member 8	NM_148929 /// NM_178371	chr2:167421716-167474641 (+) // 99.4 // qH3 chr2:167424118-167436051 (+) // 73.9 // qH3	NCBI 38	27.3637	47.3605	48.4952	20.3607	34.2706	31.5706	33.3989	83.3132	27.4298	35.3671	51.4294	30.0921	32.8524	52.1079	24.5345	36.3421	39.7585	28.0327	52.75	36.8137	37.2044	29.8604	0.753715	-1.32676	-0.407909	0.348458	0.554442	0.531426	-1.88173	-0.912059	0.0488349	0.131336	1.23287	1.23287	0.302021	0.484115	0.714185	1.24595	1.24595	0.317246	0.462589	0.693473	0.705075	-1.41829
1438044_at	1700047M11Rik	RIKEN cDNA 1700047M11 gene	NR_015458	chr1:182302574-182303325 (+) // 97.6 // qH5 chr1:182302574-182303325 (+) // 97.6 // qH5	NCBI 38	47.657	43.5907	32.2197	37.7951	40.3083	36.0061	374.088	632.422	42.9306	40.3774	32.5207	45.6524	39.6115	30.7959	217.843	348.013	40.6023	37.9959	486.397	38.3435	38.1881	275.342	0.0834757	-11.9795	-3.5825	6.11284e-09	5.69618e-07	0.0781171	-12.8013	-3.67822	4.44619e-09	4.63112e-07	0.139257	-7.18097	-2.84418	9.43627e-08	4.9194e-06	0.138693	-7.21017	-2.85003	9.21313e-08	4.9408e-06	0.935806	-1.0686
1431008_at	H2-Q6 /// H2-Q8 /// LOC68395	histocompatibility 2, Q region locus 6 /// histocompatibility 2, Q region locus 8 /// h	NM_023124 /// NM_207648 /// XM_003085179 /// XM_003688944 /// XM_003946319	chr17:35427878-35429630 (+) // 32.93 // qB1 chr17:35427878-35429630 (+) // 32.93 // qB1	NCBI 38	109.03	119.959	206.214	128.296	124.447	144.781	12358.9	12971.1	116.845	134.268	290.539	131.69	104.427	219.602	7724.89	6658.28	139.199	132.222	12661	165.805	144.544	7171.7	0.0109944	-90.9553	-6.50709	3.72012e-10	7.26325e-08	0.0104434	-95.7542	-6.58126	3.23448e-10	6.65635e-08	0.0231191	-43.2543	-5.43477	3.36924e-09	3.93193e-07	0.0201546	-49.6164	-5.63275	2.18146e-09	2.81909e-07	0.949883	-1.05276
1418809_at	Pira1 /// Pira2	paired-Ig-like receptor A1 /// paired-Ig-like receptor A2	NM_011087 /// NM_011089 /// XM_003946213	chr7:3836809-3915484 (-) // 84.91 // qA1 /// chr7:3731627-3845032 (-) // 84.74 // qA1 c	NCBI 38	161.912	205.536	533.555	313.985	303.442	518.77	1121.05	2865.31	194.024	68.9538	523.089	271.466	156.159	432.589	1014.92	1015.67	260.881	366.986	1792.3	191.277	263.705	1015.3	0.145561	-6.86997	-2.7803	0.00243934	0.0120381	0.204763	-4.8837	-2.28797	0.00867985	0.0337067	0.188395	-5.308	-2.40817	0.00635894	0.0308017	0.259731	-3.85014	-1.94491	0.0210146	0.0800153	1.40671	1.40671
1421385_a_at	Myo7a	myosin VIIA	NM_001256081 /// NM_001256082 /// NM_001256083 /// NM_008663	chr7:98051326-98109248 (-) // 96.52 // qE1 chr7:98051326-98109248 (-) // 96.52 // qE1	NCBI 38	1159.94	1375.74	1846.17	1250.95	1486.17	1932.18	4561.19	6506.56	992.779	358.523	2387.33	1246.17	495.207	2086.36	3409.48	2794.52	1433.57	1531.47	5447.58	947.183	1087.88	3086.59	0.263149	-3.80013	-1.92605	0.0120061	0.0440772	0.281129	-3.55708	-1.8307	0.0158237	0.054524	0.306861	-3.25881	-1.70434	0.0227618	0.0835979	0.352446	-2.83732	-1.50453	0.0401178	0.130894	1.06833	1.06833
1431413_at	Ramp1	receptor (calcitonin) activity modifying protein 1	NM_001168392 /// NM_016894 /// NM_178401	chr1:91180038-91223678 (+) // 81.81 // qD chr1:91223973-91225183 (+) // 85.58 // qD chr	NCBI 38	43.6823	37.5331	32.0433	44.8276	38.9595	35.2541	119.15	66.5258	42.069	37.2161	32.019	41.2136	40.9458	32.8556	78.253	32.5526	37.4504	39.4833	89.0226	36.8699	38.1341	50.4856	0.420685	-2.37708	-1.24919	0.00194318	0.01004	0.44352	-2.25469	-1.17293	0.00304105	0.0143949	0.730304	-1.36929	-0.453431	0.183452	0.390241	0.755345	-1.3239	-0.404792	0.231629	0.456907	1.05428	1.05428
1446118_at	D17Ertd165e	DNA segment, Chr 17, ERATO Doi 165, expressed	---	chr17:30024241-30024942 (+) // 82.48 // qA3.3 chr17:30024241-30024942 (+) // 82.48 // q	NCBI 38	28.4786	23.9227	36.035	33.898	24.2812	27.8395	61.4714	82.4383	29.4112	25.5137	31.682	29.4808	28.3423	29.6463	46.0588	35.3888	29.0638	28.4034	71.1859	28.7542	29.1507	40.3714	0.40828	-2.4493	-1.29237	2.83921e-05	0.00035344	0.399002	-2.50625	-1.32553	2.20504e-05	0.000292499	0.712239	-1.40402	-0.489567	0.0328217	0.111305	0.722062	-1.38492	-0.469805	0.0392603	0.128804	0.977276	-1.02325
1436680_s_at	Ddb2	damage specific DNA binding protein 2	NM_028119	chr2:91211855-91237024 (-) // 98.73 // qE1 chr2:91211583-91212300 (-) // 97.36 // qE1 c	NCBI 38	148.861	214.971	188.422	185.413	222.263	224.889	480.761	911.682	142.857	167.012	223.582	161.117	204.84	220.758	401.495	351.434	182.011	210.052	662.042	174.728	193.861	375.63	0.274923	-3.63738	-1.8629	1.05138e-05	0.000162781	0.317277	-3.15182	-1.65619	3.44455e-05	0.000412404	0.465157	-2.14981	-1.10421	0.00122042	0.00822387	0.516095	-1.93763	-0.954291	0.00350532	0.0196267	1.15406	1.15406
1419607_at	Tnf	tumor necrosis factor	NM_013693	chr17:35199371-35202004 (-) // 94.86 // qB1 chr17:35199371-35202004 (-) // 94.86 // qB1	NCBI 38	224.427	263.497	460.789	237.508	229.387	387.035	1000.25	653.797	245.025	193.924	543.671	262.017	199.018	514.919	957.643	220.735	300.921	276.269	808.677	295.616	299.448	459.767	0.372114	-2.68735	-1.42618	0.0361072	0.105635	0.341631	-2.92714	-1.54949	0.0247324	0.0775321	0.642967	-1.55529	-0.637183	0.315117	0.554359	0.651303	-1.53538	-0.618599	0.32889	0.569065	0.918082	-1.08923
1459433_at	C130051F05Rik	RIKEN cDNA C130051F05 gene	---	chr13:78113135-78113767 (+) // 99.84 // qC1 chr13:78113135-78113767 (+) // 99.84 // qC1	NCBI 38	22.6976	20.015	30.7203	17.9263	17.7805	23.9936	44.7964	58.2748	23.0088	21.2253	25.9283	18.2768	17.0884	25.0224	32.2472	26.169	24.0761	19.702	51.0929	23.3081	19.8447	29.0497	0.471222	-2.12214	-1.08552	0.000368513	0.00266351	0.38561	-2.59329	-1.37479	4.24463e-05	0.000482088	0.802356	-1.24633	-0.317686	0.185185	0.39252	0.68313	-1.46385	-0.549768	0.0309377	0.107366	0.81832	-1.22202
1455233_at	Mrps11	mitochondrial ribosomal protein S11	NM_026498	chr7:78792166-78792987 (+) // 98.43 // qD2 chr7:78792166-78792987 (+) // 98.43 // qD2 c	NCBI 38	49.1826	57.1181	53.8366	44.2981	52.7853	55.4446	70.5085	95.1999	40.7714	59.1105	68.066	57.2703	51.3794	66.785	41.2036	52.6635	53.2788	50.6117	81.9294	54.7414	58.1388	46.5823	0.650303	-1.53775	-0.620816	0.0142574	0.0505481	0.617751	-1.61878	-0.694903	0.00746788	0.029904	1.17515	1.17515	0.232845	0.30762	0.545856	1.24808	1.24808	0.31971	0.168651	0.370589	0.949943	-1.05269
1447950_at	A730011C13Rik	RIKEN cDNA A730011C13 gene	XR_104790 /// XR_107520	chr3:94994864-94995960 (-) // 47.23 // qF2.1 chr3:94994864-94995960 (-) // 47.23 // qF2	NCBI 38	35.2096	31.4969	37.5904	43.7161	36.5713	42.2378	53.2597	75.4435	30.3883	35.0324	39.6408	41.088	33.0714	45.3733	34.3354	37.8313	34.6742	40.7221	63.389	34.8156	39.5055	36.0411	0.547004	-1.82814	-0.870377	0.00042473	0.00298562	0.642414	-1.55663	-0.638425	0.00436973	0.0192945	0.966	-1.0352	-0.0499049	0.791625	0.910491	1.09612	1.09612	0.132406	0.486998	0.713097	1.17442	1.17442
1434957_at	Cdon	cell adhesion molecule-related/down-regulated by oncogenes	NM_021339	chr9:35421594-35504431 (+) // 97.68 // qA4 chr9:35506638-35507652 (+) // 98.73 // qA4 c	NCBI 38	1095.61	1613.36	968.713	1152.87	2082.55	1039.88	344.402	316.653	891.633	1463.43	600.237	926.392	1627.98	580.997	242.014	145.76	1196.33	1356.62	330.242	921.781	956.924	187.82	3.62264	3.62264	1.85704	0.00138881	0.00766199	4.1079	4.1079	2.0384	0.000668658	0.00425588	4.90778	4.90778	2.29507	0.00024537	0.00226435	5.09488	5.09488	2.34905	0.000199773	0.00198109	1.13395	1.13395
1429478_at	Bora	bora, aurora kinase A activator	NM_175265	chr14:99046221-99048113 (+) // 72.21 // qE2.2 chr14:99046221-99048113 (+) // 72.21 // q	NCBI 38	139.723	181.985	217.081	125.62	160.902	236.103	125.122	133.351	135.418	231.735	201.056	130.723	140.333	205.688	69.4517	77.7026	176.73	168.366	129.171	184.782	155.694	73.4658	1.36818	1.36818	0.452258	0.150824	0.312251	1.30344	1.30344	0.382324	0.219354	0.402126	2.51523	2.51523	1.33069	0.000619622	0.00474378	2.11928	2.11928	1.08357	0.00293291	0.0169869	0.952682	-1.04967
1436188_a_at	Ndrg4	N-myc downstream regulated gene 4	NM_001195006 /// NM_145602	chr8:95703053-95715119 (+) // 94.0 // qD1 chr8:95714479-95714956 (+) // 87.3 // qD1 chr	NCBI 38	2657.95	2592.82	2989.08	2707.88	2941.01	2969.19	82.9681	59.4384	2275.61	2773.24	2926.72	2629.35	3398.41	3857.23	40.7667	39.1734	2741.22	2870.33	70.2234	2643.26	3254.23	39.9615	39.0358	39.0358	5.28673	4.83953e-13	4.85039e-10	40.8732	40.8732	5.35308	4.13222e-13	4.54555e-10	66.1457	66.1457	6.04758	8.78454e-14	1.36618e-10	81.4354	81.4354	6.34758	4.74574e-14	8.91824e-11	1.04707	1.04707
1427086_at	Slit3	slit homolog 3 (Drosophila)	NM_011412	chr11:35700413-35712030 (+) // 92.06 // qA4 chr11:35700413-35712030 (+) // 92.06 // qA4	NCBI 38	1643.56	1759.67	874.056	2001.51	1992.33	1166.44	118.417	42.1694	1728.22	1778.86	517.555	2056.63	2069.63	372.164	73.9353	21.8739	1362.27	1669.27	70.6658	1167.41	1165.72	40.2152	19.2773	19.2773	4.26883	0.000145752	0.00126829	23.622	23.622	4.56206	7.87774e-05	0.000783114	29.0296	29.0296	4.85945	4.30195e-05	0.000564346	28.9873	28.9873	4.85735	4.32025e-05	0.000586537	1.22538	1.22538
1447191_at	Dip2b	DIP2 disco-interacting protein 2 homolog B (Drosophila)	NM_001159361 /// NM_172819	chr15:100218421-100219474 (+) // 81.96 // qF1 chr15:100142407-100142900 (+) // 69.29 //	NCBI 38	17.9771	20.1022	24.8353	19.4406	19.2543	28.5528	32.9448	74.5402	20.7417	17.9442	22.1818	23.7172	17.7314	21.7948	20.6931	38.4592	20.7815	22.0273	49.555	20.211	20.9277	28.2107	0.419362	-2.38458	-1.25373	0.00233821	0.0116419	0.444501	-2.24971	-1.16974	0.00378105	0.0171507	0.716432	-1.39581	-0.481098	0.170911	0.37247	0.741834	-1.34801	-0.430832	0.216812	0.43724	1.05995	1.05995
1433935_at	AU020206	expressed sequence AU020206	XR_105121	chr7:75769037-75770403 (-) // 32.3 // qD1 chr7:75769037-75770403 (-) // 32.3 // qD1	NCBI 38	718.571	789.896	1083.54	670.058	775.843	1071.14	2845.33	4005.26	862.845	782.416	1761.8	825.054	682.151	1352.6	2348.48	1573.36	850.419	822.704	3375.77	1059.52	913.088	1922.28	0.251915	-3.9696	-1.98899	0.000157366	0.00134957	0.243705	-4.10332	-2.03679	0.000126763	0.00114069	0.551186	-1.81427	-0.859389	0.0405555	0.130977	0.475014	-2.1052	-1.07396	0.0139048	0.0579861	0.96741	-1.03369
1428549_at	Ccdc3	coiled-coil domain containing 3	NM_028804	chr2:5137775-5230878 (+) // 96.12 // qA1 chr2:5137775-5230878 (+) // 96.12 // qA1	NCBI 38	240.58	490.457	319.048	270.887	582.063	1063.92	275.734	356.806	202.728	585.472	401.797	199.047	899.266	351.065	217.004	147.019	335.149	551.513	313.66	362.639	397.56	178.616	1.06851	1.06851	0.0956004	0.885008	0.944705	1.7583	1.7583	0.814181	0.231317	0.417062	2.03028	2.03028	1.02168	0.139167	0.323468	2.22579	2.22579	1.15432	0.0984863	0.254473	1.64557	1.64557
1438437_a_at	4933439C10Rik	RIKEN cDNA 4933439C10 gene	NR_015585	chr11:59509532-59510155 (+) // 98.56 // qB1.3 chr11:59509532-59510155 (+) // 98.56 // q	NCBI 38	381.235	316.564	425.66	351.234	354.347	438.104	624.371	695.574	289.547	399.51	501.422	358.422	408.534	416.458	403.026	349.771	371.74	379.199	659.007	387.091	393.604	375.456	0.564091	-1.77276	-0.826	0.00170173	0.00899825	0.57541	-1.73789	-0.797338	0.00220215	0.0110847	1.031	1.031	0.0440443	0.836548	0.932886	1.04834	1.04834	0.0681067	0.749944	0.885703	1.02007	1.02007
1457626_at	D3Wsu106e	DNA segment, Chr 3, Wayne State University 106, expressed	---	--- ---	NCBI 38	17.0939	22.1761	42.6096	24.9656	23.6117	42.354	68.659	43.1511	29.5309	23.572	35.6601	27.158	24.1197	37.0632	43.9544	21.8989	25.2764	29.2242	54.4281	29.1681	28.953	31.022	0.4644	-2.15331	-1.10656	0.0186439	0.0625999	0.536934	-1.86243	-0.897183	0.0482756	0.13029	0.940242	-1.06356	-0.088896	0.832203	0.930652	0.933308	-1.07146	-0.0995748	0.812443	0.917452	1.15619	1.15619
1434271_at	Gba2	glucosidase beta 2	NM_172692	chr4:43566487-43567060 (-) // 96.37 // qA5 chr4:43566927-43567552 (-) // 92.44 // qA5 c	NCBI 38	233.922	238.34	321.86	211.297	248.106	314.422	648.9	1417.56	196.613	279.741	344.483	217.182	277.493	349.465	531.082	562.797	261.805	254.5	959.108	266.592	276.156	546.709	0.272967	-3.66345	-1.8732	7.24265e-05	0.000735733	0.26535	-3.76861	-1.91403	5.89754e-05	0.000622117	0.487628	-2.05074	-1.03615	0.00747586	0.0350232	0.505122	-1.97972	-0.985296	0.0100718	0.0450396	0.972096	-1.0287
1418043_at	Abcc5	ATP-binding cassette, sub-family C (CFTR/MRP), member 5	NM_013790 /// NM_176839	chr16:20331302-20426354 (-) // 96.84 // qA3 chr16:20331302-20426354 (-) // 96.84 // qA3	NCBI 38	27.8784	29.3121	33.7811	25.88	27.9001	49.7545	47.9057	93.1706	25.7143	31.077	35.5814	25.5543	27.0226	38.9839	36.1436	40.1664	30.2225	32.9965	66.8085	30.5223	29.9703	38.1019	0.452373	-2.21056	-1.14442	0.00297873	0.0141742	0.493895	-2.02472	-1.01772	0.0064425	0.0264606	0.801066	-1.24834	-0.320007	0.325999	0.566192	0.786583	-1.27132	-0.346329	0.289352	0.527105	1.09179	1.09179
1430491_at	Bop1	block of proliferation 1	NM_013481	chr15:76452987-76477285 (-) // 98.0 // qD3 chr15:76475750-76477246 (-) // 67.02 // qD3	NCBI 38	128.021	120.866	193.934	124.797	127.248	201.538	123.605	177.61	101.535	151.458	173.67	133.608	157.496	203.733	81.5036	87.6508	144.241	147.374	148.167	138.743	162.463	84.5211	0.973502	-1.02722	-0.0387442	0.898748	0.952007	0.99465	-1.00538	-0.00773914	0.979575	0.990362	1.64151	1.64151	0.715024	0.0326855	0.110938	1.92216	1.92216	0.942728	0.00769119	0.0365339	1.02172	1.02172
1441956_s_at	Cux1	cut-like homeobox 1	NM_009986 /// NM_198602	chr5:136248134-136567280 (-) // 97.74 // qG2 chr5:136248134-136567280 (-) // 97.74 // q	NCBI 38	27.4089	47.4119	88.4752	16.4803	38.8589	40.3121	53.1619	87.7603	38.897	37.8929	70.8976	36.5382	45.9347	58.7697	43.6289	34.8455	48.6258	29.555	68.3046	47.1015	46.2041	38.9907	0.711898	-1.4047	-0.490258	0.335866	0.541296	0.432694	-2.3111	-1.20858	0.0286059	0.0867681	1.20802	1.20802	0.272644	0.587754	0.78967	1.185	1.185	0.244887	0.62593	0.813664	0.607804	-1.64527
1429283_at	Cisd2	CDGSH iron sulfur domain 2	NM_025902	chr3:135406413-135407530 (-) // 72.72 // qG3 chr3:135409966-135423407 (-) // 89.06 // q	NCBI 38	30.8096	33.2525	41.4697	26.035	32.4614	28.2058	32.777	66.2461	30.9601	35.7016	42.2446	31.0976	37.1699	34.6597	25.3756	27.8866	34.8936	28.7797	46.5978	36.0099	34.2174	26.6014	0.748829	-1.33542	-0.417292	0.116602	0.258625	0.617622	-1.61911	-0.695204	0.0150835	0.052515	1.35368	1.35368	0.436887	0.101918	0.258979	1.2863	1.2863	0.363227	0.167096	0.368033	0.824784	-1.21244
1430904_at	Arfgap3	ADP-ribosylation factor GTPase activating protein 3	NM_025445	chr15:83299736-83350247 (-) // 97.32 // qE1 chr15:83348204-83350228 (-) // 93.39 // qE1	NCBI 38	52.1132	62.9322	78.19	63.2097	64.7766	100.014	74.2871	94.9976	59.8166	71.2787	79.1683	68.093	84.854	96.1733	41.8298	55.0131	63.5315	74.2598	84.0066	69.6268	82.2133	47.9706	0.756271	-1.32228	-0.403025	0.126734	0.274977	0.883978	-1.13125	-0.177918	0.483902	0.675466	1.45145	1.45145	0.537495	0.0486645	0.150124	1.71383	1.71383	0.777224	0.00778143	0.0368606	1.16886	1.16886
1426832_at	Ddx26b	DEAD/H (Asp-Glu-Ala-Asp/His) box polypeptide 26B	NM_172779	chrX:56499611-56507843 (+) // 97.19 // qA6 chrX:56499611-56507843 (+) // 97.19 // qA6 c	NCBI 38	582.297	680.065	1144.91	667.473	735.183	1151.69	1675.23	2413.67	591.626	597.228	1353.14	880.994	695.429	1134.85	1148.14	1149.23	768.228	826.763	2010.86	781.943	885.9	1148.71	0.382048	-2.61747	-1.38817	0.00352692	0.0162529	0.411158	-2.43215	-1.28224	0.00592847	0.0247324	0.680736	-1.469	-0.554833	0.17824	0.382571	0.77124	-1.29661	-0.374748	0.353858	0.594204	1.07619	1.07619
1438652_x_at	Pigq	phosphatidylinositol glycan anchor biosynthesis, class Q	NM_011822	chr17:25926420-25941938 (-) // 91.1 // qA3.3 chr17:25927273-25937463 (-) // 86.91 // qA	NCBI 38	2141.25	2439.1	3284.38	2081.16	2523.27	3094.87	2958.68	3106.71	1928.53	2543.84	3335.19	2101.95	2402.01	3306.54	2824.97	1062.23	2579.01	2532.94	3031.68	2538.75	2555.7	1732.21	0.850653	-1.17557	-0.233357	0.532271	0.719915	0.835481	-1.19692	-0.259321	0.48847	0.679428	1.46553	1.46553	0.551423	0.153578	0.345806	1.47538	1.47538	0.561087	0.147043	0.337771	0.982164	-1.01816
1416749_at	Htra1	HtrA serine peptidase 1	NM_019564	chr7:130936129-130985651 (+) // 98.08 // qF3 chr7:130936129-130985651 (+) // 98.08 // q	NCBI 38	7388.98	8915.4	10848.5	7392.18	9734.01	9538.94	1567.1	1398.47	7230.67	7290.31	9332.36	7067.45	8007.9	10960.4	1119.42	639.286	8940.25	8820.84	1480.43	7893.78	8528.64	845.951	6.03928	6.03928	2.59438	1.90691e-07	7.79723e-06	5.95837	5.95837	2.57492	2.07871e-07	8.48444e-06	9.33155	9.33155	3.22212	1.50177e-08	1.17793e-06	10.0814	10.0814	3.33362	9.99653e-09	8.78856e-07	0.986601	-1.01358
1452205_x_at	LOC665506 /// Tcrb-J /// Trbv1	T-cell receptor beta-2 chain C region-like /// T cell receptor beta, joining region ///	XM_977361	chr6:41178440-41548350 (+) // 90.44 // qB1 chr6:41048362-41548350 (+) // 92.28 // qB1 c	NCBI 38	23.5851	17.2857	12.2903	22.7734	18.7602	16.1454	1367.17	969.289	17.3767	19.0355	14.3118	20.0992	19.5331	15.0161	1229.59	352.172	17.1118	19.0358	1151.18	16.7909	18.0649	658.048	0.0148647	-67.2733	-6.07197	2.14738e-09	2.69775e-07	0.0165361	-60.4737	-5.91824	2.93295e-09	3.44477e-07	0.0255163	-39.1906	-5.29244	1.129e-08	9.6661e-07	0.0274523	-36.4268	-5.18693	1.43642e-08	1.16727e-06	1.11244	1.11244
1428731_at	Usp54	ubiquitin specific peptidase 54	NM_030180	chr14:20548911-20561672 (-) // 87.2 // qA3 chr14:20548911-20561672 (-) // 87.2 // qA3	NCBI 38	379.166	437.235	468.363	400.86	458.701	390.144	564.781	716.027	421.577	579.881	380.744	384.612	604.316	379.417	360.11	367.031	426.624	415.51	635.924	453.196	445.111	363.555	0.67087	-1.4906	-0.575895	0.0231424	0.0744871	0.653395	-1.53047	-0.613973	0.0167558	0.0569955	1.24657	1.24657	0.317964	0.178565	0.383152	1.22433	1.22433	0.291992	0.214188	0.433752	0.973952	-1.02674
1453189_at	LOC100044900 /// Ube2i	SUMO-conjugating enzyme UBC9-like /// ubiquitin-conjugating enzyme E2I	NM_001177609 /// NM_001177610 /// NM_011665 /// XM_003946017	chrX:10660509-10662935 (+) // 92.17 // qA1.1 /// chr17:25260509-25274297 (-) // 97.06 /	NCBI 38	173.36	251.871	391.353	92.0734	194.297	155.756	232.984	744.69	153.174	235.872	315.497	188.11	268.531	233.641	202.669	279.802	257.561	140.708	416.502	225.039	227.66	238.118	0.618391	-1.6171	-0.693409	0.177333	0.350876	0.337834	-2.96003	-1.56561	0.00676048	0.0274837	0.945074	-1.05812	-0.0815008	0.869391	0.947972	0.95609	-1.04593	-0.0647817	0.895992	0.955346	0.546312	-1.83046
1430075_at	Sf3b3	splicing factor 3b, subunit 3	NM_133953	chr8:110810234-110846800 (-) // 99.17 // qE1 chr8:110845335-110846777 (-) // 92.87 // q	NCBI 38	154.85	255.878	308.021	172.701	277.128	501.283	288.258	342.327	129.25	254.972	412.913	255.462	268.547	381.179	160.922	200.454	230.266	288.415	314.133	238.741	296.815	179.603	0.733024	-1.36421	-0.448068	0.367297	0.573497	0.918132	-1.08917	-0.123227	0.80135	0.897773	1.32927	1.32927	0.410634	0.407664	0.649156	1.65261	1.65261	0.724746	0.155007	0.349969	1.25253	1.25253
1425371_at	Polb	polymerase (DNA directed), beta	NM_011130	chr8:22636671-22653435 (-) // 74.83 // qA2 chr8:22636671-22653435 (-) // 74.83 // qA2 c	NCBI 38	252.364	281.892	290.129	238.565	258.949	365.949	281.088	395.985	192.121	273.322	296.942	294.016	283.485	375.86	165.645	219.705	274.306	282.757	333.626	249.828	315.241	190.77	0.822191	-1.21626	-0.282455	0.263977	0.461584	0.847526	-1.1799	-0.23867	0.341844	0.543253	1.30958	1.30958	0.389104	0.131859	0.311719	1.65247	1.65247	0.724624	0.0104165	0.0462125	1.03081	1.03081
1443406_at	Plscr4	phospholipid scramblase 4	NM_178711	chr9:92490947-92492522 (+) // 94.71 // qE3.3 chr9:92484725-92485334 (+) // 99.18 // qE3	NCBI 38	184.743	173.277	190.087	211.263	178.887	171.569	305.934	500.292	220.405	201.317	177.532	211.263	195.961	172.235	194.331	257.518	182.562	186.473	391.207	198.972	192.474	223.704	0.46666	-2.14289	-1.09956	0.000114624	0.0010503	0.476657	-2.09795	-1.06898	0.00014834	0.00129132	0.889444	-1.1243	-0.169024	0.416963	0.656868	0.860394	-1.16226	-0.216931	0.301534	0.539509	1.02142	1.02142
1439572_at	R3hdm1	R3H domain containing 1	NM_181750	chr1:128193692-128237738 (+) // 98.94 // qE3 chr1:128105942-128106898 (+) // 91.39 // q	NCBI 38	27.7693	42.7097	60.7477	26.4432	35.5126	30.7695	47.7508	58.8643	38.7567	35.3834	67.0745	36.3453	43.6478	82.3875	30.5563	30.1316	41.6109	30.6858	53.0173	45.1408	50.7487	30.3432	0.784857	-1.27412	-0.349498	0.369826	0.576049	0.578792	-1.72773	-0.788883	0.0562795	0.146753	1.48767	1.48767	0.573055	0.151771	0.342988	1.67249	1.67249	0.741998	0.0703883	0.198946	0.73745	-1.35602
1418578_at	Dgka	diacylglycerol kinase, alpha	NM_016811	chr10:128720130-128744056 (-) // 93.07 // qD3 chr10:128720130-128744056 (-) // 93.07 //	NCBI 38	240.832	268.784	339.536	274.998	289.458	348.866	1563.51	1689.53	249.949	315.721	350.397	271.824	397.389	337.296	1330.67	650.526	280.106	302.808	1625.31	302.38	331.501	930.35	0.172343	-5.80239	-2.53665	4.5364e-07	1.49887e-05	0.18631	-5.3674	-2.42422	7.55167e-07	2.24959e-05	0.325019	-3.07675	-1.6214	5.09487e-05	0.000644916	0.35632	-2.80647	-1.48875	0.000114053	0.00127324	1.08104	1.08104
1429481_at	LOC100861934 /// Nck2	uncharacterized LOC100861934 /// non-catalytic region of tyrosine kinase adaptor protei	NM_010879 /// XM_003688768	chr1:43445750-43570518 (+) // 90.74 // qC1.1 chr1:43445750-43570518 (+) // 90.74 // qC1	NCBI 38	12.4994	12.2963	12.3099	12.3536	10.7094	11.3823	31.4214	42.5881	11.1175	12.5059	14.1818	11.2707	12.801	10.8561	21.2917	20.5937	12.3683	11.462	36.5812	12.5396	11.6133	20.9399	0.338104	-2.95767	-1.56446	1.30029e-07	5.82369e-06	0.313332	-3.1915	-1.67424	5.9023e-08	3.25427e-06	0.598841	-1.66989	-0.739755	0.00029682	0.00263573	0.554606	-1.80308	-0.850465	8.41938e-05	0.000997956	0.926734	-1.07906
1433947_at	Rab37	RAB37, member of RAS oncogene family	NM_001163753 /// NM_021411	chr11:115161529-115162245 (+) // 95.28 // qE2 chr11:115161529-115162245 (+) // 95.28 //	NCBI 38	59.3545	50.5271	37.8733	47.2351	47.0806	42.9908	162.445	509.797	54.3637	47.3623	46.6744	48.8172	46.2057	41.7079	184.77	146.945	48.4287	45.7256	287.774	49.3484	45.4809	164.776	0.168287	-5.94222	-2.571	5.19393e-06	9.42156e-05	0.158894	-6.29349	-2.65386	3.7049e-06	7.41054e-05	0.299488	-3.33903	-1.73943	0.000235131	0.00218878	0.276017	-3.62297	-1.85717	0.000130555	0.00141746	0.944185	-1.05911
1442235_at	Plagl2	pleiomorphic adenoma gene-like 2	NM_018807	chr2:153227763-153241371 (-) // 98.96 // qH1 chr2:153227763-153241371 (-) // 98.96 // q	NCBI 38	58.4768	74.8729	161.111	49.3967	72.7561	165.894	62.5778	153.768	41.4691	64.6082	196.733	82.5329	69.793	228.3	33.5371	94.191	89.0183	84.1651	98.0945	80.7785	109.559	56.204	0.907475	-1.10196	-0.14007	0.859192	0.930709	0.858005	-1.16549	-0.220942	0.779808	0.884776	1.43724	1.43724	0.523301	0.510893	0.734859	1.94931	1.94931	0.962964	0.235587	0.462026	0.945485	-1.05766
1436991_x_at	Gsn	gelsolin	NM_001206367 /// NM_001206368 /// NM_001206369 /// NM_146120	chr2:35282412-35307901 (+) // 96.37 // qB chr2:35307565-35307895 (+) // 82.59 // qB chr	NCBI 38	5446.82	4269.36	5207.87	5630.72	4806.6	5184.96	6564.98	1557.68	5669.17	4998.92	4539.17	5784.7	4739.84	4525.16	4821.37	696.484	4947.55	5196.41	3197.88	5048.01	4987.5	1832.5	1.54714	1.54714	0.629604	0.346661	0.552464	1.62505	1.62505	0.700484	0.297089	0.494776	2.75478	2.75478	1.46194	0.0412179	0.132674	2.72179	2.72179	1.44456	0.0433155	0.138561	1.05036	1.05036
1444396_at	Trp53inp2	transformation related protein 53 inducible nuclear protein 2	NM_178111	chr2:155383389-155384130 (+) // 81.27 // qH1 chr2:155383389-155384130 (+) // 81.27 // q	NCBI 38	90.0385	109.619	174.87	97.6786	118.331	206.416	245.846	265.375	64.339	125.612	189.266	126.706	134.017	211.265	127.197	168.425	119.951	133.618	255.408	115.219	153.079	146.361	0.469644	-2.12927	-1.09036	0.026078	0.0818188	0.523154	-1.91148	-0.934692	0.0507262	0.135453	0.787228	-1.27028	-0.345147	0.440573	0.676919	1.0459	1.0459	0.0647449	0.88368	0.950101	1.11394	1.11394
1454232_at	9430027B09Rik	RIKEN cDNA 9430027B09 gene	---	chr5:67381178-67382136 (-) // 71.22 // qC3.1 chr5:67381178-67382136 (-) // 71.22 // qC3	NCBI 38	33.0163	25.635	29.4188	29.7888	30.2451	31.8191	41.8397	103.619	36.6494	30.5853	45.9705	30.6115	28.8422	35.4728	35.8986	39.6809	29.2009	30.6055	65.8435	37.2124	31.5212	37.7423	0.443488	-2.25485	-1.17303	0.00142325	0.0078071	0.46482	-2.15137	-1.10526	0.00220695	0.0111015	0.985955	-1.01424	-0.0204063	0.944999	0.980127	0.835168	-1.19736	-0.259862	0.386798	0.626705	1.0481	1.0481
1460063_at	D5Ertd798e	DNA segment, Chr 5, ERATO Doi 798, expressed	---	chr5:45770013-45772180 (-) // 74.57 // qB3 chr5:45770013-45772180 (-) // 74.57 // qB3	NCBI 38	30.4578	34.2161	75.3691	22.6385	22.948	34.7144	66.5813	93.6128	45.4527	23.4643	69.3879	38.6478	23.1991	45.345	40.8011	50.2132	42.8261	26.2241	78.9485	41.9841	34.3855	45.2633	0.542455	-1.84347	-0.882425	0.0796324	0.193695	0.332167	-3.01053	-1.59002	0.00454903	0.0199268	0.927552	-1.07811	-0.1085	0.818651	0.924737	0.759679	-1.31635	-0.396538	0.408042	0.645837	0.612341	-1.63308
1457639_at	Atp6v1h	ATPase, H+ transporting, lysosomal V1 subunit H	NM_133826	chr1:5083124-5162549 (+) // 97.55 // qA1 chr1:5162167-5162447 (+) // 86.11 // qA1 chr1:	NCBI 38	59.4737	69.5666	116.375	31.3625	63.3507	82.7914	124.447	261.33	62.9093	76.0668	125.897	56.0433	75.2935	80.0287	108.921	98.307	78.3738	54.79	180.338	84.4585	69.6335	103.461	0.434594	-2.301	-1.20226	0.0169978	0.058106	0.303819	-3.29143	-1.71872	0.00180383	0.00945212	0.816327	-1.225	-0.292781	0.516022	0.738263	0.673039	-1.4858	-0.571238	0.215635	0.435706	0.699086	-1.43044
1433699_at	Tnfaip3	tumor necrosis factor, alpha-induced protein 3	NM_001166402 /// NM_009397	chr10:19000909-19001584 (-) // 96.44 // qA3 chr10:19000909-19001584 (-) // 96.44 // qA3	NCBI 38	792.05	671.683	1144.27	686.97	564.047	934.545	7759.71	7584.53	712.491	606.502	1564.86	644.017	552.892	1826.61	7766.11	2494.75	847.524	712.778	7671.54	877.752	866.436	4401.56	0.110474	-9.05194	-3.17822	8.37776e-05	0.000826433	0.0929091	-10.7632	-3.42804	4.0588e-05	0.000465436	0.199416	-5.01463	-2.32615	0.00121219	0.00817693	0.196846	-5.08013	-2.34486	0.00113965	0.00797128	0.841008	-1.18905
1429784_at	Mapk1ip1l	mitogen-activated protein kinase 1 interacting protein 1-like	NM_178684	chr14:47315954-47317490 (+) // 64.02 // qC1 chr14:47315954-47317490 (+) // 64.02 // qC1	NCBI 38	196.799	318.007	329.252	145.47	255.444	211.112	286.944	402.295	190.579	296.2	333.854	237.576	308.282	286.782	179.164	212.156	274.155	198.7	339.764	266.105	275.909	194.963	0.806899	-1.23931	-0.30954	0.325091	0.529656	0.584818	-1.70993	-0.77394	0.0239836	0.0757057	1.3649	1.3649	0.448795	0.161972	0.359322	1.41519	1.41519	0.500996	0.12189	0.296121	0.724773	-1.37974
1449993_at	Vamp5	vesicle-associated membrane protein 5	NM_001080742 /// NM_016872	chr6:72369033-72380468 (-) // 95.87 // qC1 chr6:72368162-72368643 (-) // 21.49 // qC1 c	NCBI 38	64.8155	78.7635	100.991	83.7006	74.882	67.0485	125.297	289.063	78.3573	92.2093	72.7482	82.9834	85.9113	85.0742	117.337	101.688	80.1855	74.9029	190.313	80.7035	84.6472	109.233	0.421335	-2.37341	-1.24696	0.000663279	0.0042543	0.393578	-2.54079	-1.34528	0.000352221	0.00256053	0.738822	-1.35351	-0.436701	0.142766	0.329145	0.774927	-1.29044	-0.367868	0.211465	0.430052	0.934121	-1.07052
1456229_at	Hoxb3	homeobox B3	NM_001079869 /// NM_010458	chr11:96343768-96347110 (+) // 94.34 // qD chr11:96347310-96347929 (+) // 99.04 // qD c	NCBI 38	923.464	866.799	629.176	914.62	874.538	800.235	411.025	526.295	918.293	839.223	527.087	937.159	739.907	511.692	323.756	220.462	795.622	861.812	465.107	740.6	707.943	267.164	1.71061	1.71061	0.774511	0.0198162	0.0657105	1.85294	1.85294	0.889816	0.00931212	0.035707	2.77208	2.77208	1.47097	0.000230124	0.00214971	2.64986	2.64986	1.40592	0.000341054	0.00302972	1.0832	1.0832
1444463_at	Arhgap12	Rho GTPase activating protein 12	NM_001039692 /// NM_029277	chr18:6039400-6136094 (-) // 98.48 // qA1 chr18:6037334-6037992 (-) // 77.24 // qA1 chr	NCBI 38	26.6563	27.5076	29.7043	27.2132	26.6541	32.5201	38.693	63.0854	28.0709	23.1914	31.7219	33.4976	29.1828	31.9747	27.3223	29.4819	27.927	28.6791	49.4062	27.4357	31.5004	28.3815	0.565254	-1.76912	-0.823029	0.000984409	0.00581733	0.580476	-1.72272	-0.784692	0.00142085	0.00780435	0.96667	-1.03448	-0.0489046	0.804958	0.917704	1.10989	1.10989	0.150417	0.452161	0.684655	1.02693	1.02693
1448656_at	Cacnb3	calcium channel, voltage-dependent, beta 3 subunit	NM_001044741 /// NM_007581	chr15:98635060-98644529 (+) // 94.38 // qF1 chr15:98635060-98644529 (+) // 94.38 // qF1	NCBI 38	830.208	827.682	956.671	835.043	805.839	959.429	152.422	234.788	627.894	1010.97	689.833	685.033	1154.78	733.562	125.631	94.0068	869.463	864.271	189.17	759.355	834.067	108.672	4.5962	4.5962	2.20044	1.61805e-06	3.94249e-05	4.56875	4.56875	2.1918	1.6897e-06	4.11042e-05	6.98759	6.98759	2.80479	1.04025e-07	5.2715e-06	7.67507	7.67507	2.94018	6.00141e-08	3.44802e-06	0.994028	-1.00601
1443947_at	Lims1	LIM and senescent cell antigen-like domains 1	NM_001193303 /// NM_026148 /// NM_201242	chr10:58323465-58424691 (+) // 83.34 // qB4 chr10:58323465-58424691 (+) // 83.34 // qB4	NCBI 38	30.5889	32.1853	45.4116	25.4588	28.471	46.1494	50.6733	64.3516	31.6753	34.5268	34.9066	29.362	34.5688	45.4527	37.5201	28.7149	35.4819	32.2078	57.0949	33.6658	35.8634	32.8181	0.621457	-1.60912	-0.686274	0.0232863	0.0748084	0.564113	-1.77269	-0.825944	0.00859009	0.0334301	1.02583	1.02583	0.0367917	0.892348	0.95772	1.0928	1.0928	0.128029	0.6395	0.822087	0.907727	-1.10165
1443184_at	Cdc14a	CDC14 cell division cycle 14A	NM_001080818 /// NM_001173553	chr3:116272535-116273538 (-) // 90.77 // qG1 chr3:116419708-116420380 (-) // 76.83 // q	NCBI 38	29.1301	24.8294	24.6861	26.6114	26.5376	24.8084	43.996	42.1509	29.4282	23.9792	22.2001	27.698	27.9049	23.857	26.758	22.9245	26.137	25.9723	43.0637	25.0217	26.4189	24.7672	0.606937	-1.64762	-0.720381	0.000286231	0.00217438	0.603113	-1.65806	-0.7295	0.000256497	0.00198801	1.01028	1.01028	0.0147552	0.921205	0.969844	1.06669	1.06669	0.093141	0.535345	0.751185	0.9937	-1.00634
1459807_x_at	P4htm	prolyl 4-hydroxylase, transmembrane (endoplasmic reticulum)	NM_028944	chr9:108578825-108597667 (-) // 99.15 // qF2 chr9:108578867-108579140 (-) // 95.6 // qF	NCBI 38	216.372	225.584	164.517	270.762	325.183	188.195	164.092	202.717	198.263	300.57	125.186	226.151	227.961	151.38	130.735	84.3054	200.25	254.943	182.385	195.395	198.355	104.984	1.09795	1.09795	0.134812	0.704043	0.840606	1.39782	1.39782	0.483179	0.187491	0.360629	1.86119	1.86119	0.896225	0.0229285	0.0840868	1.88938	1.88938	0.917913	0.0203734	0.078088	1.27312	1.27312
1440403_at	Arhgef1	Rho guanine nucleotide exchange factor (GEF) 1	NM_001130150 /// NM_001130151 /// NM_001130152 /// NM_001130153 /// NM_008488	chr7:24902988-24926589 (+) // 98.26 // qA3 chr7:24909234-24909966 (+) // 51.36 // qA3 c	NCBI 38	130.349	119.068	158.643	121.515	146.693	202.11	212.29	336.707	107.68	153.078	175.604	165.447	166.225	191.971	128.367	184.61	135.033	153.3	267.356	142.515	174.126	153.941	0.505069	-1.97993	-0.985448	0.00330342	0.0153992	0.573392	-1.74401	-0.802406	0.011852	0.0432752	0.925777	-1.08017	-0.111263	0.691298	0.854204	1.13112	1.13112	0.177752	0.527824	0.745596	1.13527	1.13527
1449925_at	Cxcr3	chemokine (C-X-C motif) receptor 3	NM_009910	chrX:101731535-101734147 (-) // 99.32 // qD chrX:101731535-101734147 (-) // 99.32 // qD	NCBI 38	119.252	86.4446	93.4758	102.486	105.787	95.9813	1950.9	2507.01	97.5712	73.2046	106.996	99.8813	88.4375	103.73	1731.18	937.689	98.7706	101.334	2211.49	91.4277	97.1249	1274.04	0.0446623	-22.3903	-4.4848	1.28526e-10	3.46102e-08	0.0458215	-21.8238	-4.44783	1.4243e-10	3.82364e-08	0.0717602	-13.9353	-3.80067	9.90287e-10	1.514e-07	0.076232	-13.1179	-3.71346	1.31581e-09	1.91434e-07	1.02595	1.02595
1456002_at	Xpa	xeroderma pigmentosum, complementation group A	NM_011728	chr4:46175096-46175777 (-) // 100.0 // qB1 chr4:46175096-46175777 (-) // 100.0 // qB1 c	NCBI 38	13.3308	17.5592	22.7633	17.5071	17.3593	23.477	15.9612	38.1209	13.674	17.2609	17.2921	15.3129	21.3505	20.3668	11.1893	18.069	17.4663	19.2514	24.6668	15.9809	18.8132	14.219	0.708083	-1.41226	-0.49801	0.16871	0.338439	0.780456	-1.2813	-0.357611	0.314253	0.514004	1.12391	1.12391	0.168527	0.629941	0.817088	1.3231	1.3231	0.403922	0.25825	0.489312	1.10221	1.10221
1437797_at	Atp2a2	ATPase, Ca++ transporting, cardiac muscle, slow twitch 2	NM_001110140 /// NM_009722 /// NR_027838	chr5:122453513-122501895 (-) // 98.6 // qF chr5:122454033-122501895 (-) // 99.17 // qF	NCBI 38	170.729	152.921	218.363	184.123	155.35	319.816	404.001	202.362	156.224	179.355	206.725	229.284	189.155	199.122	160.266	169.547	178.642	209.142	285.926	179.591	205.165	164.842	0.624782	-1.60056	-0.678575	0.0484589	0.132723	0.731451	-1.36715	-0.451167	0.171169	0.337791	1.08948	1.08948	0.12364	0.697735	0.858156	1.24462	1.24462	0.315705	0.329173	0.569402	1.17073	1.17073
1416708_a_at	Gramd1a	GRAM domain containing 1A	NM_027898	chr7:31130124-31151033 (-) // 96.98 // qB1 chr7:31130124-31151033 (-) // 96.98 // qB1	NCBI 38	692.922	796.092	1050.83	770.916	752.963	1245.43	1942.17	2569.32	617.114	832.091	1207.51	781.294	918.339	1193.36	1668.26	994.256	833.801	897.489	2233.82	852.727	949.589	1287.9	0.373265	-2.67906	-1.42173	0.000878841	0.00534186	0.401776	-2.48895	-1.31554	0.00159657	0.00856004	0.662116	-1.51031	-0.594844	0.095232	0.246502	0.737328	-1.35625	-0.439622	0.206331	0.42295	1.07638	1.07638
1424824_at	Slain1	SLAIN motif family, member 1	NM_198014	chr14:103656931-103704912 (+) // 95.73 // qE2.3 chr14:103656931-103704912 (+) // 95.73	NCBI 38	31.9442	34.7697	25.8228	29.9379	27.9275	29.4206	470.743	366.852	28.6098	24.1468	33.8588	25.7692	24.7475	41.2692	366.255	156.808	30.6102	29.0827	415.565	28.5987	29.7453	239.649	0.0736593	-13.576	-3.76299	2.30931e-08	1.56385e-06	0.0699838	-14.289	-3.83684	1.83286e-08	1.34631e-06	0.119336	-8.37969	-3.0669	2.51087e-07	1.05834e-05	0.12412	-8.05669	-3.01019	3.10689e-07	1.26432e-05	0.950102	-1.05252
1418415_at	Hoxb5	homeobox B5	NM_008268	chr11:96303511-96306121 (+) // 97.38 // qD chr11:96303511-96306121 (+) // 97.38 // qD	NCBI 38	339.35	308.945	229.933	327.528	263.585	261.286	993.854	876.726	345.338	284.537	183.001	307.346	259.433	167.11	698.337	415.248	288.873	282.55	933.457	261.989	237.075	538.499	0.309465	-3.23138	-1.69215	0.000131742	0.00116939	0.302692	-3.30369	-1.72408	0.000110926	0.0010262	0.486514	-2.05544	-1.03945	0.00581419	0.0286805	0.44025	-2.27144	-1.18361	0.00243143	0.0145921	0.978112	-1.02238
1439034_at	Spn	sialophorin	NM_001037810 /// NM_009259	chr7:127134149-127137817 (-) // 96.85 // qF3 chr7:127133706-127136223 (-) // 88.84 // q	NCBI 38	56.135	88.1181	66.0952	66.4765	73.0822	65.7831	435.999	756.134	76.7036	36.8302	61.9695	83.8093	53.5483	54.2299	390.187	281.199	68.8822	68.3467	574.172	55.9412	62.4349	331.242	0.119968	-8.33555	-3.05928	4.41878e-07	1.47187e-05	0.119036	-8.40085	-3.07053	4.244e-07	1.44459e-05	0.168884	-5.92121	-2.5659	3.08239e-06	7.11244e-05	0.188488	-5.30538	-2.40746	6.07834e-06	0.00012427	0.992227	-1.00783
1437122_at	Bcl2	B cell leukemia/lymphoma 2	NM_009741 /// NM_177410	chr1:106543027-106713542 (-) // 96.53 // qE2.1 chr1:106541290-106543082 (-) // 98.83 //	NCBI 38	175.632	211.157	222.223	166.86	161.146	264.672	402.11	518.329	155.165	148.137	222.36	153.503	137.11	273.358	301.882	229.88	201.991	192.351	456.522	172.255	179.187	263.433	0.442457	-2.26011	-1.17639	0.00205896	0.0105011	0.421339	-2.37338	-1.24695	0.00133611	0.00742759	0.653885	-1.52932	-0.612891	0.0665827	0.189508	0.680199	-1.47016	-0.555971	0.0924207	0.242844	0.952272	-1.05012
1432582_at	3110054G05Rik	RIKEN cDNA 3110054G05 gene	XM_001472971 /// XM_001478109	chr6:38532559-38533879 (+) // 90.26 // qB1 chr6:38532559-38533879 (-) // 90.26 // qB1 c	NCBI 38	81.8668	61.7531	67.6162	71.438	64.7404	66.1908	135.905	162.331	72.0027	70.7435	66.6226	78.0446	66.3417	55.9521	98.5702	74.5569	69.9198	67.3955	148.53	69.7504	66.167	85.7259	0.470744	-2.1243	-1.08699	3.32583e-05	0.000399357	0.453749	-2.20386	-1.14003	2.06943e-05	0.000278774	0.813646	-1.22904	-0.297527	0.113153	0.279163	0.771847	-1.29559	-0.373613	0.0526088	0.160167	0.963896	-1.03746
1424130_a_at	Ptrf	polymerase I and transcript release factor	NM_008986	chr11:100958511-100970615 (-) // 98.56 // qD chr11:100956732-100970604 (-) // 92.33 //	NCBI 38	6348.46	4572.47	5074.2	4816.22	4222.49	5383.76	4005.33	3065.42	4534.1	6691.91	4008.41	4505.7	6941.78	4057.75	3283.27	1245.9	5281.02	4783.99	3504.03	4954.42	5025.32	2022.61	1.50716	1.50716	0.591833	0.124854	0.272153	1.36529	1.36529	0.449207	0.23496	0.421563	2.44961	2.44961	1.29255	0.00337778	0.0185105	2.48469	2.48469	1.31307	0.00303185	0.0174464	0.905866	-1.10392
1450753_at	Nkg7	natural killer cell group 7 sequence	NM_024253	chr7:43437092-43438249 (+) // 96.58 // qB3 chr7:43437092-43438249 (+) // 96.58 // qB3	NCBI 38	52.5013	37.2354	37.2154	40.7119	43.0536	45.0021	4264.08	4916.17	41.3223	46.4122	34.0851	53.2756	36.8493	35.9724	3271.92	2137.2	41.7285	42.871	4578.63	40.2654	41.318	2644.35	0.00911407	-109.721	-6.77769	3.77957e-13	4.26156e-10	0.00936357	-106.797	-6.73873	4.0655e-13	4.54555e-10	0.015227	-65.6727	-6.03722	1.63417e-12	1.18875e-09	0.015625	-63.9998	-6	1.76664e-12	1.18354e-09	1.02738	1.02738
1428564_at	Zfp579	zinc finger protein 579	NM_026741	chr7:4992853-4994077 (-) // 98.87 // qA1 chr7:4992853-4994077 (-) // 98.87 // qA1	NCBI 38	632.044	719.378	856.29	703.657	744.928	833.86	402.532	610.582	607.794	850.876	629.33	716.297	895.781	572.471	274.27	298.945	730.201	758.907	495.761	687.859	716.171	286.341	1.47289	1.47289	0.55865	0.0297519	0.0908799	1.53079	1.53079	0.614276	0.0188031	0.0624478	2.40224	2.40224	1.26438	0.000101069	0.00112241	2.5011	2.5011	1.32256	6.61923e-05	0.00082619	1.03932	1.03932
1441001_at	AI225934	expressed sequence AI225934	---	chr2:84642333-84643029 (-) // 73.04 // qD chr2:84642333-84643029 (-) // 73.04 // qD chr	NCBI 38	52.6542	47.9952	67.9158	46.0434	37.917	39.2995	73.8299	139.383	48.2848	49.4346	55.0816	51.7839	50.7434	37.8445	60.069	57.1708	55.5737	40.9383	101.443	50.8491	46.3295	58.6021	0.547829	-1.82539	-0.868202	0.00319162	0.0149615	0.403559	-2.47795	-1.30915	0.000115457	0.00105854	0.867702	-1.15247	-0.204728	0.409502	0.650888	0.790581	-1.26489	-0.339015	0.18176	0.389952	0.736652	-1.35749
1455247_at	Amotl1	angiomotin-like 1	NM_001081395	chr9:14543449-14547219 (-) // 96.12 // qA2 chr9:14547354-14643529 (-) // 96.9 // qA2 ch	NCBI 38	1886.21	1798.3	1880.49	1906	1658.11	2073.83	2528.8	2913.69	1629.81	2026.97	1323.89	1704.74	2284.91	1570.37	1900.47	1294.04	1854.61	1871.4	2714.37	1635.37	1828.82	1568.21	0.683222	-1.46365	-0.549574	0.0246796	0.0782589	0.689424	-1.45049	-0.536537	0.0276471	0.0845193	1.04284	1.04284	0.0605178	0.784006	0.906531	1.16622	1.16622	0.22184	0.323596	0.563472	1.00908	1.00908
1438747_at	A930006K02Rik	RIKEN cDNA A930006K02 gene	NR_077219 /// XR_105795 /// XR_107020	chr16:91468502-91469555 (+) // 53.32 // qC3.3 chr16:91468502-91469555 (+) // 53.32 // q	NCBI 38	42.3994	40.7497	53.4826	40.0487	39.6938	49.3602	59.7222	99.3276	37.9411	43.9997	51.4208	49.7142	47.364	55.9356	40.0015	49.5374	45.2097	42.8116	77.0199	44.1132	50.8791	44.5147	0.586988	-1.70361	-0.768597	0.00383172	0.017398	0.555853	-1.79904	-0.847225	0.00193695	0.0100113	0.990976	-1.00911	-0.013078	0.953148	0.983525	1.14297	1.14297	0.192788	0.39356	0.633452	0.946958	-1.05601
1430554_at	Lrig3	leucine-rich repeats and immunoglobulin-like domains 3	NM_177152	chr10:126011630-126015356 (+) // 98.65 // qD3 chr10:125997603-126015058 (+) // 99.26 //	NCBI 38	310.672	521.529	307.556	293.543	538.956	298.514	153.572	265.84	298.018	424.797	247.268	273.605	470.485	264.494	112.925	120.795	367.989	361.462	202.053	315.16	324.112	116.794	1.82125	1.82125	0.864929	0.0352546	0.103652	1.78894	1.78894	0.839105	0.0401512	0.113052	2.69843	2.69843	1.43212	0.00187973	0.0116214	2.77508	2.77508	1.47253	0.00152957	0.0100914	0.982264	-1.01806
1420606_at	Npff	neuropeptide FF-amide peptide precursor	NM_018787 /// NR_033409	chr15:102523840-102524621 (-) // 91.13 // qF3 chr15:102523840-102524621 (-) // 91.13 //	NCBI 38	122.104	90.5503	103.425	113.442	97.1281	101.571	185.039	270.094	109.846	95.2652	99.6978	115.42	100.716	98.0619	152.585	109.467	104.572	103.824	223.557	101.422	104.462	129.24	0.467762	-2.13784	-1.09615	7.99898e-05	0.000795506	0.464416	-2.15324	-1.10651	7.31925e-05	0.00073783	0.78476	-1.27428	-0.349677	0.0938926	0.243959	0.80828	-1.23719	-0.307073	0.136441	0.320034	0.992846	-1.00721
1457357_at	Tlk2	tousled-like kinase 2 (Arabidopsis)	NM_001112705 /// NM_011903	chr11:105178806-105282221 (+) // 92.82 // qE1 chr11:105282629-105283959 (+) // 88.81 //	NCBI 38	38.8269	35.803	55.9121	32.8987	32.3493	39.984	63.1753	106.996	35.3349	38.8454	44.5008	30.4889	29.9961	49.1962	52.6129	42.94	42.6762	34.9122	82.2162	39.3827	35.5668	47.5311	0.519072	-1.92652	-0.945993	0.00423077	0.0188755	0.424638	-2.35495	-1.23569	0.000582164	0.00381946	0.828566	-1.2069	-0.271311	0.338335	0.579011	0.748289	-1.33638	-0.418333	0.149415	0.341462	0.818071	-1.22239
1457593_at	2610202C22Rik	RIKEN cDNA 2610202C22 gene	---	chr10:58284630-58285177 (+) // 100.0 // qB4 chr10:58284630-58285177 (+) // 100.0 // qB4	NCBI 38	73.5698	70.9242	156.97	77.8771	78.7861	166.153	153.185	265.485	75.0316	82.0212	162.346	87.4261	101.548	160.596	71.9066	189.077	93.5632	100.644	201.664	99.9705	112.551	116.601	0.463955	-2.15538	-1.10794	0.0539572	0.14426	0.499069	-2.00373	-1.00269	0.0773942	0.187332	0.857368	-1.16636	-0.222014	0.677855	0.846461	0.965262	-1.03599	-0.0510075	0.92372	0.967863	1.07569	1.07569
[truncated: 20,849 more rows]
[truncated: 38 more columns]
