# Supplementary material for: Circadian Disruption Primes Myofibroblasts for Accelerated Activation as a Mechanism Underpinning Fibrotic Progression in Non-Alcoholic Fatty Liver Disease
Source: Cells. 2023 Jun 8;12(12):1582. doi: 10.3390/cells12121582 (PMC10297459; doi:10.3390/cells12121582)
Supplement: Supplementary file 1 [file cells-12-01582-s001.zip › Supplementary Table S2 upregulated extracellular genes.xlsx]

## Sheet: extracellular upregulated
MOUSE|MGI=MGI=98280|UniProtKB=Q01102	Selp	P-selectin;Selp;PTN000449262;orthologs	P-SELECTIN (PTHR19325:SF484)	complement component(PC00078)	Mus musculus
MOUSE|MGI=MGI=1888992|UniProtKB=Q61468	Msln	Mesothelin;Msln;PTN000601865;orthologs	MESOTHELIN (PTHR23412:SF6)	cell adhesion molecule(PC00069)	Mus musculus
MOUSE|MGI=MGI=88461|UniProtKB=E9PWQ3	Col6a3	Collagen, type VI, alpha 3;Col6a3;PTN000615806;orthologs	COLLAGEN ALPHA-3(VI) CHAIN (PTHR24020:SF13)	extracellular matrix structural protein(PC00103)	Mus musculus
MOUSE|MGI=MGI=88554|UniProtKB=P12399	Ctla2a	Protein CTLA-2-alpha;Ctla2a;;orthologs			Mus musculus
MOUSE|MGI=MGI=96441|UniProtKB=P47880	Igfbp6	Insulin-like growth factor-binding protein 6;Igfbp6;PTN000167619;orthologs	INSULIN-LIKE GROWTH FACTOR-BINDING PROTEIN 6 (PTHR11551:SF14)	protease inhibitor(PC00191)	Mus musculus
MOUSE|MGI=MGI=107557|UniProtKB=Q62181	Sema3c	Semaphorin-3C;Sema3c;PTN000112411;orthologs	SEMAPHORIN-3C (PTHR11036:SF25)	membrane-bound signaling molecule(PC00152)	Mus musculus
MOUSE|MGI=MGI=96561|UniProtKB=P10168	Il7	Interleukin-7;Il7;;orthologs			Mus musculus
MOUSE|MGI=MGI=98726|UniProtKB=P27090	Tgfb2	Transforming growth factor beta-2 proprotein;Tgfb2;PTN000218738;orthologs	TRANSFORMING GROWTH FACTOR BETA-2 PROPROTEIN (PTHR11848:SF141)	growth factor(PC00112)	Mus musculus
MOUSE|MGI=MGI=98384|UniProtKB=P15702	Spn	Leukosialin;Spn;PTN002173935;orthologs	LEUKOSIALIN (PTHR35265:SF1)		Mus musculus
MOUSE|MGI=MGI=1354952|UniProtKB=Q9QUN9	Dkk3	Dickkopf-related protein 3;Dkk3;PTN000787775;orthologs	DICKKOPF-RELATED PROTEIN 3 (PTHR12113:SF8)	membrane trafficking regulatory protein(PC00151)	Mus musculus
MOUSE|MGI=MGI=97479|UniProtKB=Q8R4K8	Pappa	Pappalysin-1;Pappa;PTN000449520;orthologs	PAPPALYSIN-1 (PTHR46130:SF2)		Mus musculus
MOUSE|MGI=MGI=88476|UniProtKB=Q61147	Cp	Ceruloplasmin;Cp;PTN000014605;orthologs	CERULOPLASMIN (PTHR11709:SF226)	oxidase(PC00175)	Mus musculus
MOUSE|MGI=MGI=88469|UniProtKB=Q9R0G6	Comp	Cartilage oligomeric matrix protein;Comp;PTN000023713;orthologs	CARTILAGE OLIGOMERIC MATRIX PROTEIN (PTHR10199:SF88)	cell adhesion molecule(PC00069)	Mus musculus
MOUSE|MGI=MGI=94872|UniProtKB=P28654	Dcn	Decorin;Dcn;PTN000689221;orthologs	DECORIN (PTHR45712:SF14)		Mus musculus
MOUSE|MGI=MGI=88454|UniProtKB=P02463	Col4a1	Collagen alpha-1(IV) chain;Col4a1;PTN000614372;orthologs	COLLAGEN ALPHA-1(IV) CHAIN (PTHR24023:SF854)	extracellular matrix structural protein(PC00103)	Mus musculus
MOUSE|MGI=MGI=1343044|UniProtKB=Q9WV02	Rbmx	RNA-binding motif protein, X chromosome;Rbmx;PTN002366952;orthologs	RNA-BINDING MOTIF PROTEIN, X CHROMOSOME (PTHR48034:SF18)	RNA metabolism protein(PC00031)	Mus musculus
MOUSE|MGI=MGI=1339468|UniProtKB=P08207	S100a10	Protein S100-A10;S100a10;PTN000181856;orthologs	PROTEIN S100-A10 (PTHR11639:SF74)	calmodulin-related(PC00061)	Mus musculus
MOUSE|MGI=MGI=101925|UniProtKB=P08730	Krt13	Keratin, type I cytoskeletal 13;Krt13;PTN000581435;orthologs	KERATIN, TYPE I CYTOSKELETAL 13 (PTHR23239:SF121)	intermediate filament(PC00129)	Mus musculus
MOUSE|MGI=MGI=88297|UniProtKB=P09240	Cck	Cholecystokinin;Cck;PTN000082143;orthologs	CHOLECYSTOKININ (PTHR10786:SF0)		Mus musculus
MOUSE|MGI=MGI=95851|UniProtKB=P13020	Gsn	Gelsolin;Gsn;PTN000240182;orthologs	GELSOLIN (PTHR11977:SF29)	non-motor actin binding protein(PC00165)	Mus musculus
MOUSE|MGI=MGI=2183426|UniProtKB=Q9Z132	Rspo1	R-spondin-1;Rspo1;PTN000588916;orthologs	R-SPONDIN-1 (PTHR46987:SF5)		Mus musculus
MOUSE|MGI=MGI=1891344|UniProtKB=Q9JM99	Prg4	Proteoglycan 4;Prg4;PTN000531417;orthologs	PROTEOGLYCAN 4 (PTHR22917:SF1)		Mus musculus
MOUSE|MGI=MGI=98727|UniProtKB=P17125	Tgfb3	Transforming growth factor beta-3 proprotein;Tgfb3;PTN000218780;orthologs	TRANSFORMING GROWTH FACTOR BETA-3 PROPROTEIN (PTHR11848:SF34)	growth factor(PC00112)	Mus musculus
MOUSE|MGI=MGI=88487|UniProtKB=Q8R4V4	Cpz	Carboxypeptidase Z;Cpz;PTN000164068;orthologs	CARBOXYPEPTIDASE Z (PTHR11532:SF63)	protease(PC00190)	Mus musculus
MOUSE|MGI=MGI=1913936|UniProtKB=Q9D4J3	Dcbld1	Discoidin, CUB and LCCL domain-containing protein 1;Dcbld1;;orthologs			Mus musculus
MOUSE|MGI=MGI=106923|UniProtKB=Q62381	Tll1	Tolloid-like protein 1;Tll1;PTN000013571;orthologs	TOLLOID-LIKE PROTEIN 1 (PTHR10127:SF860)	metalloprotease(PC00153)	Mus musculus
MOUSE|MGI=MGI=105938|UniProtKB=P61021	Rab5b	Ras-related protein Rab-5B;Rab5b;PTN000634757;orthologs	RAS-RELATED PROTEIN RAB-5B (PTHR24073:SF555)	small GTPase(PC00208)	Mus musculus
MOUSE|MGI=MGI=88468|UniProtKB=Q01149	Col1a2	Collagen alpha-2(I) chain;Col1a2;PTN000615787;orthologs	COLLAGEN ALPHA-2(I) CHAIN (PTHR24023:SF568)	extracellular matrix structural protein(PC00103)	Mus musculus
MOUSE|MGI=MGI=98754|UniProtKB=P39876	Timp3	Metalloproteinase inhibitor 3;Timp3;PTN000217685;orthologs	METALLOPROTEINASE INHIBITOR 3 (PTHR11844:SF22)	protease inhibitor(PC00191)	Mus musculus
MOUSE|MGI=MGI=107656|UniProtKB=P01580	Ifng	Interferon gamma;Ifng;PTN000152047;orthologs	INTERFERON GAMMA (PTHR11419:SF0)	interferon superfamily(PC00127)	Mus musculus
MOUSE|MGI=MGI=1916925|UniProtKB=Q3UQ28	Pxdn	Peroxidasin homolog;Pxdn;PTN000158888;orthologs	PEROXIDASIN HOMOLOG (PTHR11475:SF75)	peroxidase(PC00180)	Mus musculus
MOUSE|MGI=MGI=2444418|UniProtKB=Q8C850	Scara3	Scavenger receptor class A member 3;Scara3;PTN000707277;orthologs	SCAVENGER RECEPTOR CLASS A MEMBER 3 (PTHR24023:SF1047)	extracellular matrix structural protein(PC00103)	Mus musculus
MOUSE|MGI=MGI=98725|UniProtKB=P04202	Tgfb1	Transforming growth factor beta-1 proprotein;Tgfb1;PTN000218767;orthologs	TRANSFORMING GROWTH FACTOR BETA-1 PROPROTEIN (PTHR11848:SF125)	growth factor(PC00112)	Mus musculus
MOUSE|MGI=MGI=103022|UniProtKB=Q60841	Reln	Reelin;Reln;PTN000217402;orthologs	REELIN (PTHR11841:SF1)	extracellular matrix glycoprotein(PC00100)	Mus musculus
MOUSE|MGI=MGI=2449923|UniProtKB=Q9QXT5	Egfl7	Epidermal growth factor-like protein 7;Egfl7;PTN000383663;orthologs	EPIDERMAL GROWTH FACTOR-LIKE PROTEIN 7 (PTHR14949:SF21)	intercellular signal molecule(PC00207)	Mus musculus
MOUSE|MGI=MGI=892014|UniProtKB=Q8C4U3	Sfrp1	Secreted frizzled-related protein 1;Sfrp1;PTN000139818;orthologs	SECRETED FRIZZLED-RELATED PROTEIN 1 (PTHR11309:SF87)	transmembrane signal receptor(PC00197)	Mus musculus
MOUSE|MGI=MGI=1915213|UniProtKB=Q9Z0J0	Npc2	NPC intracellular cholesterol transporter 2;Npc2;PTN000139342;orthologs	NPC INTRACELLULAR CHOLESTEROL TRANSPORTER 2 (PTHR11306:SF0)		Mus musculus
MOUSE|MGI=MGI=99551|UniProtKB=Q9WTR5	Cdh13	Cadherin-13;Cdh13;PTN000616672;orthologs	CADHERIN-13 (PTHR24027:SF80)	cadherin(PC00057)	Mus musculus
MOUSE|MGI=MGI=107286|UniProtKB=O09159	Man2b1	Lysosomal alpha-mannosidase;Man2b1;PTN000176532;orthologs	ALPHA-MANNOSIDASE 2-RELATED (PTHR11607:SF3)	glycosidase(PC00110)	Mus musculus
MOUSE|MGI=MGI=97010|UniProtKB=P28862	Mmp3	Stromelysin-1;Mmp3;PTN000024091;orthologs	STROMELYSIN-1 (PTHR10201:SF215)	metalloprotease(PC00153)	Mus musculus
MOUSE|MGI=MGI=103576|UniProtKB=P48298	Ccl11	Eotaxin;Ccl11;PTN000245964;orthologs	C-C MOTIF CHEMOKINE 13 (PTHR12015:SF147)	cytokine(PC00083)	Mus musculus
MOUSE|MGI=MGI=104687|UniProtKB=Q9QZR9	Col4a4	Collagen alpha-4(IV) chain;Col4a4;PTN000613726;orthologs	COLLAGEN ALPHA-4(IV) CHAIN (PTHR24023:SF714)	extracellular matrix structural protein(PC00103)	Mus musculus
MOUSE|MGI=MGI=109347|UniProtKB=P51885	Lum	Lumican;Lum;PTN000689707;orthologs	LUMICAN (PTHR45712:SF6)		Mus musculus
MOUSE|MGI=MGI=1339752|UniProtKB=P01587	Csf2	Granulocyte-macrophage colony-stimulating factor;Csf2;PTN000006651;orthologs	GRANULOCYTE-MACROPHAGE COLONY-STIMULATING FACTOR (PTHR10059:SF0)	cytokine(PC00083)	Mus musculus
MOUSE|MGI=MGI=96548|UniProtKB=P04351	Il2	Interleukin-2;Il2;;orthologs			Mus musculus
MOUSE|MGI=MGI=88459|UniProtKB=Q04857	Col6a1	Collagen alpha-1(VI) chain;Col6a1;PTN000614650;orthologs	COLLAGEN ALPHA-1(VI) CHAIN (PTHR24020:SF18)	extracellular matrix structural protein(PC00103)	Mus musculus
MOUSE|MGI=MGI=105382|UniProtKB=Q61001	Lama5	Laminin subunit alpha-5;Lama5;PTN000742971;orthologs	LAMININ SUBUNIT ALPHA-5 (PTHR10574:SF261)	extracellular matrix protein(PC00102)	Mus musculus
MOUSE|MGI=MGI=2138563|UniProtKB=Q8K007	Sulf1	Extracellular sulfatase Sulf-1;Sulf1;PTN000038221;orthologs	EXTRACELLULAR SULFATASE SULF-1 (PTHR43108:SF1)	hydrolase(PC00121)	Mus musculus
MOUSE|MGI=MGI=95684|UniProtKB=P97737	Gdf10	Growth/differentiation factor 10;Gdf10;PTN000218228;orthologs	GROWTH/DIFFERENTIATION FACTOR 10 (PTHR11848:SF145)	growth factor(PC00112)	Mus musculus
MOUSE|MGI=MGI=95936|UniProtKB=P14429	H2-Q7	H-2 class I histocompatibility antigen, Q7 alpha chain;H2-Q7;PTN000422689;orthologs	CLASS IB MHC ANTIGEN QA-2-RELATED (PTHR16675:SF251)	major histocompatibility complex protein(PC00149)	Mus musculus
MOUSE|MGI=MGI=96556|UniProtKB=P07750	Il4	Interleukin-4;Il4;PTN000156017;orthologs	INTERLEUKIN-4 (PTHR47401:SF1)	interleukin superfamily(PC00128)	Mus musculus
MOUSE|MGI=MGI=1891708|UniProtKB=Q9WVA8	Npff	Pro-FMRFamide-related neuropeptide FF;Npff;PTN000385968;orthologs	PRO-FMRFAMIDE-RELATED NEUROPEPTIDE FF (PTHR15044:SF0)		Mus musculus
MOUSE|MGI=MGI=88455|UniProtKB=P08122	Col4a2	Collagen alpha-2(IV) chain;Col4a2;PTN000615605;orthologs	COLLAGEN ALPHA-2(IV) CHAIN (PTHR24023:SF588)	extracellular matrix structural protein(PC00103)	Mus musculus
MOUSE|MGI=MGI=1923703|UniProtKB=Q9D6X6	Prss23	Serine protease 23;Prss23;PTN000397523;orthologs	SERINE PROTEASE 23 (PTHR15462:SF10)	serine protease(PC00203)	Mus musculus
MOUSE|MGI=MGI=96941|UniProtKB=P21844	Cma1	Chymase;Cma1;PTN000668253;orthologs	CHYMASE (PTHR24271:SF24)	serine protease(PC00203)	Mus musculus
MOUSE|MGI=MGI=1913945|UniProtKB=Q99MQ4	Aspn	Asporin;Aspn;PTN000689475;orthologs	ASPORIN (PTHR45712:SF2)		Mus musculus
MOUSE|MGI=MGI=96765|UniProtKB=P35951	Ldlr	Low-density lipoprotein receptor;Ldlr;PTN000056422;orthologs	LOW-DENSITY LIPOPROTEIN RECEPTOR (PTHR24270:SF21)	apolipoprotein(PC00052)	Mus musculus
MOUSE|MGI=MGI=1860118|UniProtKB=Q8BH34	Sema3d	Semaphorin-3D;Sema3d;PTN000112786;orthologs	SEMAPHORIN-3D (PTHR11036:SF36)	membrane-bound signaling molecule(PC00152)	Mus musculus
MOUSE|MGI=MGI=1202890|UniProtKB=O35608	Angpt2	Angiopoietin-2;Angpt2;PTN000441689;orthologs	ANGIOPOIETIN-2 (PTHR19143:SF199)	intercellular signal molecule(PC00207)	Mus musculus
MOUSE|MGI=MGI=2384806|UniProtKB=Q8VE43	Metrnl	Meteorin-like protein;Metrnl;PTN002006104;orthologs	METEORIN-LIKE PROTEIN (PTHR28593:SF1)		Mus musculus
MOUSE|MGI=MGI=1196389|UniProtKB=P54099	Polg	DNA polymerase subunit gamma-1;Polg;PTN000030216;orthologs	DNA POLYMERASE SUBUNIT GAMMA-1 (PTHR10267:SF0)	DNA-directed DNA polymerase(PC00018)	Mus musculus
MOUSE|MGI=MGI=3046463|UniProtKB=Q7TPG6	Fam19a3	Chemokine-like protein TAFA-3;Tafa3;PTN000788788;orthologs	CHEMOKINE-LIKE PROTEIN TAFA-3 (PTHR31770:SF3)	chemokine(PC00074)	Mus musculus
MOUSE|MGI=MGI=109608|UniProtKB=P97321	Fap	Prolyl endopeptidase FAP;Fap;PTN000198456;orthologs	PROLYL ENDOPEPTIDASE FAP (PTHR11731:SF136)	serine protease(PC00203)	Mus musculus
MOUSE|MGI=MGI=1932137|UniProtKB=A0A5F8MPH8	Tnxb	Tenascin XB;Tnxb;PTN000441620;orthologs	TENASCIN-X (PTHR46708:SF3)	extracellular matrix protein(PC00102)	Mus musculus
MOUSE|MGI=MGI=98419|UniProtKB=Q6P069	Sri	Sorcin;Sri;PTN000022299;orthologs	SORCIN (PTHR46735:SF7)		Mus musculus
MOUSE|MGI=MGI=1306797|UniProtKB=O70423	Aoc3	Membrane primary amine oxidase;Aoc3;PTN000067366;orthologs	MEMBRANE PRIMARY AMINE OXIDASE (PTHR10638:SF23)	oxidase(PC00175)	Mus musculus
MOUSE|MGI=MGI=95489|UniProtKB=Q61554	Fbn1	Fibrillin-1;Fbn1;PTN000620855;orthologs	FIBRILLIN-1 (PTHR24039:SF22)	extracellular matrix structural protein(PC00103)	Mus musculus
MOUSE|MGI=MGI=101780|UniProtKB=Q07235	Serpine2	Glia-derived nexin;Serpine2;PTN000156238;orthologs	GLIA-DERIVED NEXIN (PTHR11461:SF48)	protease inhibitor(PC00191)	Mus musculus
MOUSE|MGI=MGI=97610|UniProtKB=P11214	Plat	Tissue-type plasminogen activator;Plat;PTN000667077;orthologs	TISSUE-TYPE PLASMINOGEN ACTIVATOR (PTHR24264:SF42)	serine protease(PC00203)	Mus musculus
MOUSE|MGI=MGI=108110|UniProtKB=P70663	Sparcl1	SPARC-like protein 1;Sparcl1;PTN000355740;orthologs	SPARC-LIKE PROTEIN 1 (PTHR13866:SF16)	extracellular matrix glycoprotein(PC00100)	Mus musculus
MOUSE|MGI=MGI=96817|UniProtKB=P28301	Lox	Protein-lysine 6-oxidase;Lox;PTN000450120;orthologs	PROTEIN-LYSINE 6-OXIDASE (PTHR45817:SF6)	oxidase(PC00175)	Mus musculus
MOUSE|MGI=MGI=95942|UniProtKB=F6T1I5	H2-T10	Histocompatibility 2, T region locus 10;H2-T10;PTN000422692;orthologs	HISTOCOMPATIBILITY 2, T REGION LOCUS 10-RELATED (PTHR16675:SF264)	major histocompatibility complex protein(PC00149)	Mus musculus
MOUSE|MGI=MGI=88453|UniProtKB=P08121	Col3a1	Collagen alpha-1(III) chain;Col3a1;PTN000615705;orthologs	COLLAGEN ALPHA-1(III) CHAIN (PTHR24023:SF604)	extracellular matrix structural protein(PC00103)	Mus musculus
MOUSE|MGI=MGI=1919293|UniProtKB=Q8CFG0	Sulf2	Extracellular sulfatase Sulf-2;Sulf2;PTN000038189;orthologs	EXTRACELLULAR SULFATASE SULF-2 (PTHR43108:SF4)	hydrolase(PC00121)	Mus musculus
MOUSE|MGI=MGI=87916|UniProtKB=P03958	Ada	Adenosine deaminase;Ada;PTN000150957;orthologs	ADENOSINE DEAMINASE (PTHR11409:SF43)	deaminase(PC00088)	Mus musculus
MOUSE|MGI=MGI=95487|UniProtKB=Q08879	Fbln1	Fibulin-1;Fbln1;PTN000621700;orthologs	FIBULIN-1 (PTHR24034:SF97)	extracellular matrix structural protein(PC00103)	Mus musculus
MOUSE|MGI=MGI=3045252|UniProtKB=Q4ZJN1	C1qtnf9	Complement C1q and tumor necrosis factor-related protein 9;C1qtnf9;PTN002369259;orthologs	COMPLEMENT C1Q AND TUMOR NECROSIS FACTOR-RELATED PROTEIN 9A (PTHR15427:SF21)	scaffold/adaptor protein(PC00226)	Mus musculus
MOUSE|MGI=MGI=88158|UniProtKB=P28653	Bgn	Biglycan;Bgn;PTN000689494;orthologs	BIGLYCAN (PTHR45712:SF11)		Mus musculus
MOUSE|MGI=MGI=1888504|UniProtKB=Q9EP95	Retnla	Resistin-like alpha;Retnla;PTN000473646;orthologs	RESISTIN-LIKE ALPHA (PTHR21101:SF5)		Mus musculus
MOUSE|MGI=MGI=1197012|UniProtKB=Q640N1	Aebp1	Adipocyte enhancer-binding protein 1;Aebp1;PTN000164018;orthologs	ADIPOCYTE ENHANCER-BINDING PROTEIN 1 (PTHR11532:SF48)	protease(PC00190)	Mus musculus
MOUSE|MGI=MGI=1349183|UniProtKB=P84444	Ccl21a	C-C motif chemokine 21a;Ccl21a;PTN000245765;orthologs	C-C MOTIF CHEMOKINE 21 (PTHR12015:SF72)	cytokine(PC00083)	Mus musculus
MOUSE|MGI=MGI=96976|UniProtKB=P19788	Mgp	Matrix Gla protein;Mgp;PTN000011598;orthologs	MATRIX GLA PROTEIN (PTHR10109:SF0)		Mus musculus
MOUSE|MGI=MGI=96743|UniProtKB=P02469	Lamb1	Laminin subunit beta-1;Lamb1;PTN000742536;orthologs	LAMININ SUBUNIT BETA-1 (PTHR10574:SF233)	extracellular matrix protein(PC00102)	Mus musculus
MOUSE|MGI=MGI=88457|UniProtKB=O88207	Col5a1	Collagen alpha-1(V) chain;Col5a1;PTN000615269;orthologs	COLLAGEN ALPHA-1(V) CHAIN (PTHR24023:SF387)	extracellular matrix structural protein(PC00103)	Mus musculus
MOUSE|MGI=MGI=95660|UniProtKB=Q61592	Gas6	Growth arrest-specific protein 6;Gas6;PTN000620708;orthologs	GROWTH ARREST-SPECIFIC PROTEIN 6 (PTHR24040:SF14)		Mus musculus
MOUSE|MGI=MGI=1930088|UniProtKB=Q9QZM3	Clcf1	Cardiotrophin-like cytokine factor 1;Clcf1;PTN000482592;orthologs	CARDIOTROPHIN-LIKE CYTOKINE FACTOR 1 (PTHR21353:SF7)		Mus musculus
MOUSE|MGI=MGI=108078|UniProtKB=P97299	Sfrp2	Secreted frizzled-related protein 2;Sfrp2;PTN000139793;orthologs	SECRETED FRIZZLED-RELATED PROTEIN 2 (PTHR11309:SF45)	transmembrane signal receptor(PC00197)	Mus musculus
MOUSE|MGI=MGI=96440|UniProtKB=Q07079	Igfbp5	Insulin-like growth factor-binding protein 5;Igfbp5;PTN000167745;orthologs	INSULIN-LIKE GROWTH FACTOR-BINDING PROTEIN 5 (PTHR11551:SF4)	protease inhibitor(PC00191)	Mus musculus
MOUSE|MGI=MGI=1349645|UniProtKB=Q6GU68	Islr	Immunoglobulin superfamily containing leucine-rich repeat protein;Islr;PTN000688052;orthologs	IMMUNOGLOBULIN SUPERFAMILY CONTAINING LEUCINE-RICH REPEAT PROTEIN (PTHR24366:SF14)	immunoglobulin superfamily cell adhesion molecule(PC00125)	Mus musculus
MOUSE|MGI=MGI=1328364|UniProtKB=P50608	Fmod	Fibromodulin;Fmod;PTN000689754;orthologs	FIBROMODULIN (PTHR45712:SF4)		Mus musculus
MOUSE|MGI=MGI=95558|UniProtKB=P35969	Flt1	Vascular endothelial growth factor receptor 1;Flt1;PTN000699235;orthologs	VASCULAR ENDOTHELIAL GROWTH FACTOR RECEPTOR 1 (PTHR24416:SF390)	transmembrane signal receptor(PC00197)	Mus musculus
MOUSE|MGI=MGI=88467|UniProtKB=P11087	Col1a1	Collagen alpha-1(I) chain;Col1a1;PTN000615857;orthologs	COLLAGEN ALPHA-1(I) CHAIN (PTHR24023:SF569)	extracellular matrix structural protein(PC00103)	Mus musculus
MOUSE|MGI=MGI=97380|UniProtKB=P20181	Ntf3	Neurotrophin-3;Ntf3;PTN000173540;orthologs	NEUROTROPHIN-3 (PTHR11589:SF4)	neurotrophic factor(PC00163)	Mus musculus
MOUSE|MGI=MGI=2670967|UniProtKB=Q8R0S6	Wfikkn1	WAP, Kazal, immunoglobulin, Kunitz and NTR domain-containing protein 1;Wfikkn1;PTN000009229;orthologs	WAP, KAZAL, IMMUNOGLOBULIN, KUNITZ AND NTR DOMAIN-CONTAINING PROTEIN 1 (PTHR45938:SF6)		Mus musculus
MOUSE|MGI=MGI=88182|UniProtKB=P20722	Bmp6	Bone morphogenetic protein 6;Bmp6;PTN000218652;orthologs	BONE MORPHOGENETIC PROTEIN 6 (PTHR11848:SF137)	growth factor(PC00112)	Mus musculus
MOUSE|MGI=MGI=1315202|UniProtKB=Q9WVB4	Slit3	Slit homolog 3 protein;Slit3;PTN000690547;orthologs	SLIT HOMOLOG 3 PROTEIN (PTHR45836:SF9)		Mus musculus
MOUSE|MGI=MGI=95896|UniProtKB=P14427	H2-D1	H-2 class I histocompatibility antigen, D-P alpha chain;H2-D1;PTN000422680;orthologs	CLASS IB MHC ANTIGEN QA-2-RELATED (PTHR16675:SF251)	major histocompatibility complex protein(PC00149)	Mus musculus
MOUSE|MGI=MGI=1100089|UniProtKB=O35235	Tnfsf11	Tumor necrosis factor ligand superfamily member 11;Tnfsf11;PTN000158076;orthologs	TUMOR NECROSIS FACTOR LIGAND SUPERFAMILY MEMBER 11 (PTHR11471:SF3)	intercellular signal molecule(PC00207)	Mus musculus
MOUSE|MGI=MGI=88460|UniProtKB=Q02788	Col6a2	Collagen alpha-2(VI) chain;Col6a2;PTN000614507;orthologs	COLLAGEN ALPHA-2(VI) CHAIN (PTHR24020:SF29)	extracellular matrix structural protein(PC00103)	Mus musculus
MOUSE|MGI=MGI=1096550|UniProtKB=O35728	Cyp4a14	Cytochrome P450 4A14;Cyp4a14;PTN000669800;orthologs	CYTOCHROME P450 4A14-RELATED (PTHR24291:SF47)	oxygenase(PC00177)	Mus musculus
MOUSE|MGI=MGI=1339998|UniProtKB=Q8BPB5	Efemp1	EGF-containing fibulin-like extracellular matrix protein 1;Efemp1;PTN000621725;orthologs	EGF-CONTAINING FIBULIN-LIKE EXTRACELLULAR MATRIX PROTEIN 1 (PTHR24034:SF102)	extracellular matrix structural protein(PC00103)	Mus musculus
MOUSE|MGI=MGI=95935|UniProtKB=P79568	H2-Q6	Class Ib MHC antigen Qa-2;H2-Q6;PTN000422688;orthologs	CLASS IB MHC ANTIGEN QA-2-RELATED (PTHR16675:SF251)	major histocompatibility complex protein(PC00149)	Mus musculus
MOUSE|MGI=MGI=2442987|UniProtKB=Q8C8N3	Vwc2	Brorin;Vwc2;PTN002259682;orthologs	BRORIN (PTHR46252:SF4)		Mus musculus
MOUSE|MGI=MGI=97231|UniProtKB=Q02496	Muc1	Mucin-1;Muc1;PTN000000435;orthologs	MUCIN-1 (PTHR10006:SF19)	cell adhesion molecule(PC00069)	Mus musculus
MOUSE|MGI=MGI=104796|UniProtKB=P41155	Ltb	Lymphotoxin-beta;Ltb;PTN000157976;orthologs	LYMPHOTOXIN-BETA (PTHR11471:SF29)	intercellular signal molecule(PC00207)	Mus musculus
MOUSE|MGI=MGI=95933|UniProtKB=Q8HWB2	H2-Q4	Histocompatibility 2, Q region locus 4;H2-Q4;PTN001047532;orthologs	CLASS IB MHC ANTIGEN QA-2-RELATED (PTHR16675:SF251)	major histocompatibility complex protein(PC00149)	Mus musculus
MOUSE|MGI=MGI=106096|UniProtKB=P97873	Loxl1	Lysyl oxidase homolog 1;Loxl1;PTN000450138;orthologs	LYSYL OXIDASE HOMOLOG 1 (PTHR45817:SF8)	oxidase(PC00175)	Mus musculus
MOUSE|MGI=MGI=1270855|UniProtKB=O54824	Il16	Pro-interleukin-16;Il16;PTN000140331;orthologs	PRO-INTERLEUKIN-16 (PTHR11324:SF2)	interleukin superfamily(PC00128)	Mus musculus
MOUSE|MGI=MGI=97009|UniProtKB=P33434	Mmp2	72 kDa type IV collagenase;Mmp2;PTN000024239;orthologs	72 KDA TYPE IV COLLAGENASE (PTHR10201:SF29)	metalloprotease(PC00153)	Mus musculus
MOUSE|MGI=MGI=1316648|UniProtKB=E9Q616	Ahnak	AHNAK nucleoprotein (desmoyokin);Ahnak;PTN000598174;orthologs	NEUROBLAST DIFFERENTIATION-ASSOCIATED PROTEIN AHNAK (PTHR23348:SF41)		Mus musculus
MOUSE|MGI=MGI=1858418|UniProtKB=Q9WTJ5	Ramp1	Receptor activity-modifying protein 1;Ramp1;PTN000362912;orthologs	RECEPTOR ACTIVITY-MODIFYING PROTEIN 1 (PTHR14076:SF3)	transmembrane signal receptor(PC00197)	Mus musculus
MOUSE|MGI=MGI=1346091|UniProtKB=Q9WVH9	Fbln5	Fibulin-5;Fbln5;PTN000621760;orthologs	FIBULIN-5 (PTHR24034:SF107)	extracellular matrix structural protein(PC00103)	Mus musculus
MOUSE|MGI=MGI=2180196|UniProtKB=Q8K4Z0	Lgi2	Leucine-rich repeat LGI family member 2;Lgi2;PTN000688431;orthologs	LEUCINE-RICH REPEAT LGI FAMILY MEMBER 2 (PTHR24367:SF21)		Mus musculus
MOUSE|MGI=MGI=108427|UniProtKB=O09107	Rlf	Insulin-like 3;Insl3;PTN000046212;orthologs	INSULIN-LIKE 3 (PTHR10423:SF3)		Mus musculus
MOUSE|MGI=MGI=1914123|UniProtKB=Q9DBY4	Tril	TLR4 interactor with leucine rich repeats;Tril;PTN000688512;orthologs	TLR4 INTERACTOR WITH LEUCINE RICH REPEATS (PTHR24373:SF307)	transmembrane signal receptor(PC00197)	Mus musculus
MOUSE|MGI=MGI=104688|UniProtKB=Q9QZS0	Col4a3	Collagen alpha-3(IV) chain;Col4a3;PTN000614387;orthologs	COLLAGEN ALPHA-3(IV) CHAIN (PTHR24023:SF1077)	extracellular matrix structural protein(PC00103)	Mus musculus
MOUSE|MGI=MGI=105384|UniProtKB=P63017	Hspa8	Heat shock cognate 71 kDa protein;Hspa8;PTN000453071;orthologs	HEAT SHOCK COGNATE 71 KDA PROTEIN (PTHR19375:SF379)	Hsp70 family chaperone(PC00027)	Mus musculus
MOUSE|MGI=MGI=1926142|UniProtKB=Q8BZQ2	Crispld2	Cysteine-rich secretory protein LCCL domain-containing 2;Crispld2;PTN000036338;orthologs	CYSTEINE-RICH SECRETORY PROTEIN LCCL DOMAIN-CONTAINING 2 (PTHR10334:SF64)	defense/immunity protein(PC00090)	Mus musculus
MOUSE|MGI=MGI=109278|UniProtKB=Q62000	Ogn	Mimecan;Ogn;PTN000689679;orthologs	MIMECAN (PTHR46269:SF1)		Mus musculus
MOUSE|MGI=MGI=1921749|UniProtKB=Q99P68	Sost	Sclerostin;Sost;PTN000382775;orthologs	SCLEROSTIN (PTHR14903:SF4)	intercellular signal molecule(PC00207)	Mus musculus
MOUSE|MGI=MGI=1860139|UniProtKB=Q9WV18	Gabbr1	Gamma-aminobutyric acid type B receptor subunit 1;Gabbr1;PTN000055015;orthologs	GAMMA-AMINOBUTYRIC ACID TYPE B RECEPTOR SUBUNIT 1 (PTHR10519:SF76)	G-protein coupled receptor(PC00021)	Mus musculus
MOUSE|MGI=MGI=1859310|UniProtKB=Q9JHE3	Asah2	Neutral ceramidase;Asah2;PTN000292685;orthologs	NEUTRAL CERAMIDASE (PTHR12670:SF1)		Mus musculus
MOUSE|MGI=MGI=2151110|UniProtKB=Q9JK53	Prelp	Prolargin;Prelp;PTN000689804;orthologs	PROLARGIN (PTHR45712:SF8)		Mus musculus
MOUSE|MGI=MGI=1920962|UniProtKB=Q6P253	Dmkn	Dermokine;Dmkn;PTN002199133;orthologs	DERMOKINE (PTHR36881:SF1)		Mus musculus
MOUSE|MGI=MGI=1316731|UniProtKB=O88452	Stc2	Stanniocalcin-2;Stc2;PTN000133680;orthologs	STANNIOCALCIN-2 (PTHR11245:SF2)	peptide hormone(PC00179)	Mus musculus
MOUSE|MGI=MGI=97609|UniProtKB=P12388	Serpinb2	Plasminogen activator inhibitor 2, macrophage;Serpinb2;PTN000156941;orthologs	PLASMINOGEN ACTIVATOR INHIBITOR 2 (PTHR11461:SF61)	protease inhibitor(PC00191)	Mus musculus
MOUSE|MGI=MGI=1890474|UniProtKB=Q9ES17	Il21	Interleukin-21;Il21;PTN000372083;orthologs	INTERLEUKIN-21 (PTHR14356:SF2)	interleukin superfamily(PC00128)	Mus musculus
MOUSE|MGI=MGI=107558|UniProtKB=O08665	Sema3a	Semaphorin-3A;Sema3a;PTN000112600;orthologs	SEMAPHORIN-3A (PTHR11036:SF23)	membrane-bound signaling molecule(PC00152)	Mus musculus
MOUSE|MGI=MGI=102793|UniProtKB=Q62356	Fstl1	Follistatin-related protein 1;Fstl1;PTN000099300;orthologs	FOLLISTATIN-RELATED PROTEIN 1 (PTHR10913:SF13)	protease inhibitor(PC00191)	Mus musculus
MOUSE|MGI=MGI=97011|UniProtKB=P41245	Mmp9	Matrix metalloproteinase-9;Mmp9;PTN000024263;orthologs	MATRIX METALLOPROTEINASE-9 (PTHR10201:SF30)	metalloprotease(PC00153)	Mus musculus
MOUSE|MGI=MGI=109297|UniProtKB=P97430	Slpi	Antileukoproteinase;Slpi;PTN000455299;orthologs	ANTILEUKOPROTEINASE (PTHR19441:SF44)	protease inhibitor(PC00191)	Mus musculus
MOUSE|MGI=MGI=98427|UniProtKB=P14719	Il1rl1	Interleukin-1 receptor-like 1;Il1rl1;PTN000223830;orthologs	INTERLEUKIN-1 RECEPTOR-LIKE 1 (PTHR11890:SF7)	transmembrane signal receptor(PC00197)	Mus musculus
MOUSE|MGI=MGI=2444507|UniProtKB=Q66K08	Cilp	Cartilage intermediate layer protein 1;Cilp;PTN000385678;orthologs	CARTILAGE INTERMEDIATE LAYER PROTEIN 1 (PTHR15031:SF3)		Mus musculus
MOUSE|MGI=MGI=104641|UniProtKB=P48759	Ptx3	Pentraxin-related protein PTX3;Ptx3;PTN000444312;orthologs	PENTRAXIN-RELATED PROTEIN PTX3 (PTHR46943:SF1)		Mus musculus
MOUSE|MGI=MGI=1926321|UniProtKB=Q62009	Postn	Periostin;Postn;PTN000096397;orthologs	PERIOSTIN (PTHR10900:SF12)	cell adhesion molecule(PC00069)	Mus musculus
MOUSE|MGI=MGI=1347361|UniProtKB=O88676	Mmp23	Matrix metalloproteinase-23;Mmp23;PTN000023958;orthologs	MATRIX METALLOPROTEINASE-23 (PTHR10201:SF7)	metalloprotease(PC00153)	Mus musculus
