# Supplementary material for: Circadian Disruption Primes Myofibroblasts for Accelerated Activation as a Mechanism Underpinning Fibrotic Progression in Non-Alcoholic Fatty Liver Disease
Source: Cells. 2023 Jun 8;12(12):1582. doi: 10.3390/cells12121582 (PMC10297459; doi:10.3390/cells12121582)
Supplement: Supplementary file 1 [file cells-12-01582-s001.zip › Supplementary Table S3 circadian rhythm gene expression changes.xlsx]

## Sheet: Sheet1
		WT aHSCs v qHSCs		CLOCKΔ19 aHSCs v qHSCs		T12 vs T0 WT aHSCs		T12 vs T0 CLOCKΔ19 aHSCs		CLOCKΔ19 v WT qHSCs		CLOCKΔ19 v WT aHSCs (T12)
Gene	Name on array	Ratio	FDR	Ratio	FDR	Ratio	FDR	Ratio	FDR	Ratio	FDR	Ratio	FDR
Clock	Clock	1.0623	0.828	0.7787	0.1832	1.0757	0.9205	0.9238	0.7925	1.3237	0.694	0.8334	0.8821
Bmal1	Arntl	0.7425	0.394	0.9731	0.9528	1.1657	0.9177	1.057	0.7958	1.0373	0.9713	1.2328	0.8821
Per1	Per1	0.4451	0.0854	0.3013	0.0111	1.1077	0.9205	1.0311	0.8848	1.0781	0.9294	0.6792	0.8821
Per2	Per2	1.4144	0.0992	1.2258	0.3415	0.8448	0.9177	1.0327	0.8863	0.8576	0.7981	0.9086	0.8986
Cry1	Cry1	0.7893	0.5871	0.6403	0.2095	0.7054	0.9177	1.019	0.9357	1.0163	0.9904	1.1911	0.8821
Cry2	Cry2	1.3269	0.3335	1.2691	0.4011	1.0616	0.9319	1.072	0.7207	0.6653	0.6132	0.6425	0.8821
Rev-erba	Nr1d1	0.6452	0.1747	0.596	0.0915	1.3177	0.9177	0.9496	0.7973	1.1508	0.8116	0.766	0.8821
Rev-erbb	Nr1d2	0.8556	0.8525	0.6648	0.5043	1.0472	0.9557	1.0019	0.9948	0.8964	0.868	0.6663	0.8821
Rora	Rora	1.1782	0.4288	1.0066	0.9818	0.9427	0.9337	0.8573	0.5248	1.1646	0.8374	0.9048	0.8821
Rorb	Rorb	0.9595	0.9294	0.8931	0.7379	1.095	0.9177	0.9579	0.869	1.1374	0.8549	0.9262	0.8912
Rory	Rorc	0.2813	0.0001	0.4041	0.0007	0.9823	0.9938	1.0918	0.7096	0.7279	0.6616	1.1623	0.8821
Dbp	Dbp	1.1881	0.8327	0.6923	0.5522	0.8463	0.9177	1.2584	0.5645	0.6643	0.6449	0.5756	0.8821
Nfil3	Nfil3	0.8541	0.8097	1.931	0.1423	1.0981	0.9177	1.1084	0.7025	0.5581	0.551	1.2736	0.8821
	Supplementary Table S3 - Relative expression of core circadian genes between treatment groups based on microarray
